# Supplementary material for: Dynamic genome-scale cell-specific metabolic models reveal novel inter-cellular and intra-cellular metabolic communications during ovarian follicle development
Source: BMC Bioinformatics. 2019 Jun 10;20:307. doi: 10.1186/s12859-019-2825-2 (PMC6558917; doi:10.1186/s12859-019-2825-2)
Supplement: Supplementary file 2 — Metabolic model functionalities. (XLSX 66 kb) [file 12859_2019_2825_MOESM3_ESM.xlsx]

## Sheet: NoRxLimits
Metabolic functions	MiceRecon2	MiceRecon2 before gap filling	MiceRecon1 updated	Follicle	Oocyte					Somatic cells					Mural cells		Cumulus cells
					Primordial	Primary	Secondary	Small Antral	Large Antral	Primordial	Primary	Secondary	Small Antral	Large Antral	Small Antral	Large Antral	Small Antral	Large Antral	NSN	SN
ATP max, aerobic, glc	1	1	1	1	1	1	1	1	1	1	1	1	1	1	1	1	1	1	1	1
ATP max, anaerobic, glc	1	1	1	1	0	0	1	0	1	0	1	0	1	1	1	1	0	1	1	1
ATP max, aerobic, citrate	1	1	1	1	1	1	1	1	1	1	1	1	1	1	1	1	1	1	1	1
ATP max, aerobic, etoh	1	1	1	1	1	1	1	1	1	1	1	1	1	1	1	1	1	1	1	1
ATP max, aerobic, glu_L	1	1	1	1	1	1	1	1	1	1	1	1	1	1	1	1	1	1	1	1
ATP max, aerobic, gln_L	1	1	1	1	1	1	1	1	1	1	1	1	1	1	1	1	1	1	1	1
ATP max, aerobic, gly	1	1	1	1	1	1	1	1	1	1	1	1	1	1	1	1	1	1	1	1
ATP max, aerobic, lac_L	1	1	1	1	1	1	1	1	1	1	1	1	1	1	1	1	1	1	1	1
ATP max, aerobic, pro-L	1	1	1	1	1	1	1	1	1	1	1	1	1	1	1	1	1	1	1	1
ATP max, aerobic, pyruvate	1	1	1	1	1	1	1	1	1	1	1	1	1	1	1	1	1	1	1	1
ATP production via electron transport chain	1	1	1	0	0	0	0	0	0	0	0	0	0	1	0	0	0	1	0	0
gthrd reduces h2o2, GTHP (c)	1	1	1	1	1	0	1	0	0	0	0	0	1	1	1	0	0	1	1	1
gthrd reduces h2o2, GTHP (e)	1	1	1	0	0	1	0	1	0	0	0	1	0	0	0	0	0	0	0	0
gthrd reduces h2o2, GTHP (m)	1	1	1	1	1	1	1	1	1	1	1	1	1	1	1	1	1	1	1	1
gly -> co2 + nh4	1	1	1	1	1	1	1	1	1	1	1	1	1	1	1	1	1	1	1	1
Biomass	1	1	1	1	1	1	1	1	1	1	1	1	1	1	1	1	1	1	1	1
Biomass from pyruvate	1	1	1	1	1	1	1	1	1	1	1	1	1	1	1	1	1	1	1	1
Test human biomass	0	0	0	0	0	0	0	0	0	0	0	0	0	0	0	0	0	0	0	0
12ppd_S[c] -> mthgxl[c]	1	1	0	1	0	1	1	1	1	1	0	1	1	1	1	1	1	1	1	1
12ppd_S[c] -> pyr[c]	1	1	0	1	1	1	1	1	1	1	1	1	1	1	1	1	1	1	1	1
3pg[c] -> gly[c]	1	1	1	1	0	0	1	1	1	0	1	1	1	1	1	1	0	1	1	1
3pg[c] -> ser_L[c]	1	1	1	1	0	0	1	0	1	0	1	1	1	1	1	1	0	1	1	1
4abut[c] -> succ[m]	1	1	1	1	0	1	0	1	0	1	1	1	1	1	1	0	1	1	1	1
4hpro_LT[m] -> glx[m]	1	1	1	1	0	0	0	0	0	0	0	0	0	0	1	1	0	0	0	0
5aop[c] -> pheme[c]	1	1	1	1	1	1	1	1	1	1	1	1	1	1	1	1	1	1	1	1
aact[c] -> mthgxl[c]	1	1	1	1	1	1	0	1	0	1	0	1	0	1	1	0	1	0	1	1
acac[m] -> acetone[m]	1	1	1	1	0	0	1	0	1	0	1	0	1	1	0	1	0	1	1	0
acac[m] -> bhb[m]	1	1	1	1	1	0	1	0	1	0	1	0	0	0	1	1	0	1	1	1
acald[c] -> ac[c]	1	1	1	1	1	1	1	1	1	1	1	1	1	1	1	1	1	1	1	1
accoa[c] -> pmtcoa[c]	1	1	0	1	0	1	1	0	1	0	1	0	1	1	1	1	0	1	1	1
pmtcoa[c] -> malcoa[m]	1	1	1	1	1	1	1	1	1	1	1	1	1	1	1	1	1	1	1	1
acetone[c] -> mthgxl[c]	1	1	1	1	0	0	1	0	1	0	1	0	1	1	1	1	0	1	1	1
acgal[c] -> udpacgal[c]	1	1	1	0	0	0	0	0	0	1	0	0	0	1	1	1	0	0	0	1
acgam[c] -> cmpacna[c]	1	1	1	1	0	0	1	0	0	0	0	0	0	1	1	1	0	0	0	1
acorn[c] -> orn[c]	1	1	1	0	0	0	0	0	0	0	0	0	0	0	0	0	0	0	0	0
adrnl[c] -> 34dhoxpeg[c]	1	1	0	1	0	1	0	1	0	1	0	1	1	1	1	0	1	1	1	1
akg[c] -> glu-L[c] (ALATA_L)	1	1	0	1	1	1	1	1	1	1	1	1	0	1	1	1	1	0	1	1
akg[c] -> glu-L[c] (ASPTA)	1	1	1	1	0	0	1	1	1	1	1	1	1	0	1	1	1	1	0	1
akg[m] -> oaa[m]	1	1	1	1	1	1	1	1	1	1	1	1	1	1	1	1	1	1	1	1
akg[m] -> glu_L[m]	1	1	1	1	1	0	1	0	1	0	1	1	1	1	1	1	1	1	1	1
akg[m] -> glu_L[m] (ASPTAm)	1	1	1	1	0	1	1	1	1	1	1	1	1	1	1	1	1	1	1	1
ala_B[c] -> msa[m]	1	1	1	1	0	1	1	1	1	1	1	1	1	1	1	1	1	1	1	1
ala_D[c] -> pyr[c]	1	1	1	1	1	0	1	0	1	0	1	1	1	1	1	1	1	1	1	1
ala_L[c] -> ala_D[c]	1	1	1	1	1	0	1	0	1	0	1	1	1	1	1	1	1	1	1	1
ala_L[c] -> pyr[c]	1	1	1	1	1	1	1	1	1	1	1	1	1	1	1	1	1	1	1	1
arachd[c] -> malcoa[m]	1	1	1	1	1	1	0	0	0	0	0	0	1	1	0	0	0	0	0	0
arachd[r] -> txa2[r]	1	1	1	1	0	0	0	0	0	0	0	0	0	0	1	0	0	0	0	1
arg_L[c] -> creat[c]	1	1	1	1	0	1	0	1	0	1	0	1	1	1	1	0	1	0	1	1
arg_L -> glu_L [m]	1	1	1	1	1	1	0	1	1	1	1	1	1	1	1	0	1	1	1	1
arg_L -> no	1	1	1	1	1	1	0	1	1	1	0	1	1	1	1	0	1	1	1	1
arg_L[c] -> pcreat[c]	1	1	1	1	0	0	0	0	0	0	0	0	1	1	1	0	0	0	1	1
ascb_L[c] -> eryth[c]	1	1	1	0	0	0	0	0	0	0	0	0	0	0	0	0	0	0	0	0
ascb_L[c] -> lyxnt[c]	1	1	1	0	0	0	0	0	0	0	0	0	0	0	0	0	0	0	0	0
ascb_L[c] -> thrnt[c]	1	1	1	0	0	0	0	0	0	0	0	0	0	0	0	0	0	0	0	0
ascb_L[c] -> xylnt[c]	1	1	1	0	0	0	0	0	0	0	0	0	0	0	0	0	0	0	0	0
asn_L[c] -> oaa[c]	1	1	1	1	1	1	1	1	1	1	1	1	1	1	1	1	1	1	1	1
asp_L[c] + hco3[c] -> arg_L[c]	1	1	1	1	0	1	0	1	0	1	0	1	1	1	1	0	1	1	1	1
asp_L[c] -> ala_B[c]	1	1	1	1	1	1	1	1	1	1	1	1	1	1	1	1	1	1	1	1
asp-L[c] -> asn-L[c]	1	1	1	1	1	0	1	0	0	0	1	0	1	1	0	1	0	1	1	0
asp_L[c] -> argsuc[c], asp-L -> fum (via argsuc), 1	1	1	1	1	0	1	0	1	0	1	0	1	1	1	1	0	1	1	1	1
argsuc[c] -> fum[c], asp-L -> fum (via argsuc), 2	1	1	1	1	0	1	0	1	0	1	0	1	1	1	1	0	1	1	1	1
asp_L[c] -> dcamp[c], asp_L -> fum (via dcamp), 1	1	1	1	1	1	1	1	0	1	0	1	0	1	1	1	1	0	1	1	1
dcamp[c] -> fum[c], asp_L -> fum (via dcamp), 2	1	1	1	1	1	1	1	1	1	1	1	1	1	1	1	1	1	1	1	1
dcamp[c] -> fum[c], asp_L -> fum (via dcamp), 3	1	1	1	1	1	0	1	0	1	0	1	1	1	1	1	1	0	1	1	1
asp_L[c] -> oaa[c]	1	1	1	1	1	1	1	1	1	1	1	1	1	1	1	1	1	1	1	1
carn -> ala_B	1	1	1	1	0	0	1	1	1	1	1	1	1	1	1	1	0	1	1	1
chol[c] + dag_hs[c] -> pe_hs[c]	1	1	1	0	0	0	1	0	0	0	0	0	0	0	0	0	0	0	0	0
choline -> betaine (glyb) -> glycine, 1 [m]	1	1	1	1	1	0	1	0	1	0	1	0	0	0	1	1	0	1	0	1
choline -> betaine (glyb) -> glycine, 2 [m]	1	1	1	0	0	0	1	0	1	0	0	0	0	0	1	0	0	1	0	1
coke[r] -> pecgoncoa[r]	1	1	1	0	0	0	0	0	0	0	0	0	0	0	0	0	0	0	0	0
core2[g] -> ksii_core2[g]	1	1	1	1	1	1	0	0	0	0	0	1	1	1	1	0	0	1	0	1
core4[g] -> ksii_core4[g]	1	1	1	1	0	0	0	0	0	0	0	0	1	1	1	0	0	1	0	1
cspg_a[ly] -> gal[ly] + glcur[ly] + xyl_D[ly]	1	1	1	1	1	1	0	1	0	0	0	1	1	1	1	0	1	1	1	1
cspg_b[ly] -> gal[ly] + glcur[ly] + xyl_D[ly]	1	1	1	0	0	0	0	0	0	0	0	0	0	0	0	0	0	0	0	0
cspg_c[ly] -> gal[ly] + glcur[ly] + xyl_D[ly]	1	1	1	0	0	1	0	0	0	0	0	1	0	0	0	0	1	0	0	1
cspg_d[ly] -> gal[ly] + glcur[ly] + xyl_D[ly]	1	1	1	0	0	1	0	0	0	0	0	1	0	0	0	0	1	0	0	1
cspg_e[ly] -> gal[ly] + glcur[ly] + xyl_D[ly]	1	1	1	0	0	1	0	0	0	0	0	1	0	0	0	0	1	0	0	1
cys-L + glu-L + gly -> ghtrd	1	1	1	1	1	1	1	1	1	1	1	1	1	1	1	1	1	1	1	1
cys-L -> 3sala -> so4, 1	1	1	1	1	1	1	1	1	1	1	1	1	1	1	1	1	1	1	1	1
cys-L -> 3sala -> so4, 2	1	1	1	1	1	1	1	1	1	1	1	1	1	1	1	1	1	1	1	1
cys_L[c] -> hyptaur[c]	1	1	1	1	1	1	1	1	1	1	1	1	1	1	1	1	1	1	1	1
cystine (Lcystin) -> cys-L	1	1	1	1	1	1	1	1	1	1	1	1	1	1	1	1	1	1	1	1
dhap[c] -> mthgxl[c]	1	1	1	1	0	0	1	1	1	0	1	1	1	1	1	1	0	1	1	1
dmpp[c] -> ggdp[c]	1	1	0	0	0	0	0	0	0	0	0	0	0	0	0	0	0	0	0	0
dna[n] -> dna5mtc[n]	1	1	1	0	0	0	0	0	0	0	0	0	0	0	0	0	0	0	0	0
dolichol_L[c] -> dolmanp_L[r]	1	1	1	0	0	0	0	0	0	0	0	0	0	0	0	0	0	0	0	0
dolichol_L[c] -> g3m8mpdol_L[r]	1	1	1	0	0	0	0	0	0	0	0	0	0	0	0	0	0	0	0	0
dolichol_U[c] -> dolmanp_U[r]	1	1	1	0	0	0	0	0	0	0	0	0	0	0	0	0	0	0	0	0
dolichol_U[c] -> g3m8mpdol_U[r]	1	1	1	0	0	0	0	0	0	0	0	0	0	0	0	0	0	0	0	0
dopa[c] -> homoval[c]	1	1	1	0	0	0	0	0	0	0	0	0	0	0	0	0	0	0	0	0
etoh[c] -> acald[c]	1	1	1	1	1	1	1	1	1	1	1	1	1	1	1	1	1	1	1	1
f6p[c] + g3p[c] -> r5p[c]	1	1	1	1	1	1	1	1	1	1	1	1	1	1	1	1	1	1	1	1
frdp[c] -> dolichol_L[r]	1	1	1	0	0	0	0	0	0	0	0	0	0	0	0	0	0	0	0	0
frdp[c] -> dolichol_U[r]	1	1	1	0	0	0	0	0	0	0	0	0	0	0	0	0	0	0	0	0
ade[c] -> amp[c]	1	1	1	0	0	0	0	0	1	0	0	0	0	0	1	1	0	0	0	1
adn[c] -> urate[x]	1	1	1	1	0	1	1	0	1	0	1	0	0	0	1	0	0	0	0	1
adp[c] -> datp[n]	1	1	1	0	0	0	0	0	0	0	0	0	0	0	0	0	0	0	0	0
cdp[c] -> dctp[n]	1	1	1	1	1	0	1	0	1	0	1	0	1	1	1	1	0	1	1	1
cmp[c] -> cytd[c]	1	1	1	1	1	1	1	1	1	1	1	1	1	1	1	1	1	1	1	1
cytd[c] -> ala_B[c]	1	1	1	1	0	0	0	0	1	0	1	1	1	1	1	0	0	1	1	1
dcmp[c] -> ala_B[c]	1	1	1	0	0	0	0	0	0	1	1	0	1	1	1	0	0	1	0	1
gdp[c] -> dgtp[n]	1	1	1	0	0	0	0	0	0	0	0	0	0	0	0	0	0	0	0	0
gln-L + HCO3 -> UMP[c]	1	1	1	1	1	1	1	1	1	1	1	1	0	1	1	1	1	0	1	1
gsn[c] -> urate[x]	1	1	1	1	0	0	1	0	1	0	1	0	0	0	1	0	1	0	0	1
gua[c] -> gmp[c]	1	1	1	1	0	0	0	0	1	0	0	0	0	0	0	0	0	0	0	0
hxan[c] -> imp[c]	1	1	1	1	0	0	0	0	0	0	0	1	0	0	0	0	0	0	0	0
imp[c] -> atp[c]	1	1	1	0	0	0	0	0	0	0	0	0	0	0	0	0	0	0	0	0
imp[c] -> gtp[c]	1	1	1	1	1	1	1	1	1	1	1	1	1	1	1	1	1	1	1	1
imp[c] -> urate[x]	1	1	1	1	0	0	1	0	1	0	1	0	0	0	1	0	0	0	0	1
prpp[c] -> imp[c]	1	1	1	1	0	1	1	0	1	0	1	0	1	1	1	1	0	1	1	1
pydx[c] -> pydx5p[c]	1	1	1	1	0	0	1	0	1	0	0	0	1	1	1	0	0	1	1	1
thm[c] -> thmpp[c]	1	1	1	1	1	1	1	1	1	1	1	1	1	1	1	1	1	1	1	1
thm[e] -> thmpp[m]	0	0	0	0	0	0	0	0	0	0	0	0	0	0	0	0	0	0	0	0
thmmp[e] -> thmpp[c]	0	0	0	0	0	0	0	0	0	0	0	0	0	0	0	0	0	0	0	0
thmmp[e] -> thmpp[m]	0	0	0	0	0	0	0	0	0	0	0	0	0	0	0	0	0	0	0	0
tyr_L[m] -> q10[m]	0	0	0	0	0	0	0	0	0	0	0	0	0	0	0	0	0	0	0	0
udp[c] -> dttp[n]	1	1	1	0	0	0	0	0	0	0	0	0	0	0	0	0	0	0	0	0
ump[c] -> ala_B[c]	1	1	1	1	0	1	1	0	1	0	1	1	1	1	1	0	0	1	1	1
fru[c] -> dhap[c]	1	1	1	1	1	1	1	1	1	1	1	1	1	1	1	1	1	1	1	1
fru[c] -> g3p[c]	1	1	1	1	1	1	1	1	1	1	1	1	1	1	1	1	1	1	1	1
fuc_L[c] -> gdpfuc[c]	1	1	1	1	0	0	0	0	0	0	0	0	0	1	1	0	0	1	1	1
fum[m] -> oaa[m]	1	1	1	1	1	1	1	1	1	1	1	1	1	1	1	1	1	1	1	1
g1p[c] -> dtdprmn[c]	1	1	1	0	0	0	0	0	0	0	0	0	0	0	0	0	0	0	0	0
g3p[c] -> mthgxl[c]	1	1	1	1	0	0	1	1	1	0	1	1	1	1	1	1	0	1	1	1
g6p[c] -> r5p[c]	1	1	1	1	1	1	1	1	1	1	1	1	1	1	1	1	1	1	1	1
g6p[c] -> ru5p_D[c]	1	1	1	1	1	1	1	1	1	1	1	1	1	1	1	1	1	1	1	1
gal[c] -> glc_D[c]	1	1	1	1	1	1	1	1	1	1	0	1	1	1	1	0	1	1	1	1
gal[c] -> udpgal[c]	1	1	1	1	0	0	1	0	1	0	0	0	0	1	1	0	0	0	1	1
galgluside_hs[g] -> galgalgalthcrm_hs[g]	1	1	1	1	0	0	0	0	0	0	0	0	0	0	0	0	0	0	0	0
galgluside_hs[g] -> acgagbside_hs[g]	1	1	1	1	0	0	0	0	0	1	0	0	0	1	1	0	0	0	0	1
galgluside_hs[g] -> acnacngalgbside_hs[g]	1	1	1	1	0	0	0	0	0	0	0	0	0	1	1	1	0	0	1	1
galgluside_hs[g] -> gd1b2_hs[g]	1	1	1	1	0	0	0	0	0	0	0	0	0	0	1	0	0	0	0	1
galgluside_hs[g] -> gd1c_hs[g]	1	1	1	1	0	0	0	0	0	0	0	0	0	1	0	0	0	0	1	1
galgluside_hs[g] -> gp1c_hs[g]	1	1	1	1	0	0	0	0	0	0	0	0	0	0	1	0	0	0	0	1
galgluside_hs[g] -> gq1balpha_hs[g]	1	1	1	1	0	0	0	0	0	0	0	0	0	1	1	0	0	0	0	1
gam6p[c] -> uacgam[c]	1	1	1	1	0	0	1	0	1	0	1	0	0	1	1	1	0	0	1	1
gdpmann[c] -> gdpfuc[c]	1	1	1	1	1	1	1	1	1	1	1	1	1	1	1	1	1	1	1	1
glc_D[c] -> inost[c]	1	1	1	1	0	1	1	1	0	1	0	1	1	1	1	0	1	1	1	1
glc_D[c] -> lac_L[c] + atp[c] + h2o[c]	1	1	0	1	0	0	1	0	1	0	1	0	1	1	1	1	0	1	1	1
glc_D[c] -> lac_D[c]	1	1	1	1	0	0	1	1	1	0	1	1	1	1	1	1	0	1	1	1
glc_D[c] -> lcts[g]	1	1	1	1	1	1	1	1	1	1	1	1	1	1	1	1	1	1	1	1
glc_D[c] -> pyr[c]	1	1	1	1	1	1	1	1	1	1	1	1	1	1	1	1	1	1	1	1
gln_L[c] -> nh4[c]	1	1	1	1	1	1	1	1	1	1	1	1	1	1	1	1	1	1	1	1
gln_L[m] -> glu_L[m]	1	1	0	1	1	1	1	1	1	1	1	1	1	1	1	1	1	1	1	1
glu5sa[c] -> pro_L[c]	1	1	1	0	0	0	0	0	0	0	0	0	0	0	0	0	0	0	0	0
glu_L[c] -> 4abut[c]	1	1	1	1	1	1	1	1	1	1	1	1	1	1	1	1	1	1	1	1
glu_L[c] -> gln_L[c]	1	1	1	1	1	0	1	0	1	0	1	0	1	1	1	1	0	1	1	1
glu-L -> pro-L	1	1	1	0	0	0	0	0	0	0	0	0	0	0	0	0	0	0	0	0
glu_L[m] -> akg[m]	1	1	1	1	1	1	1	1	1	1	1	1	1	1	1	1	1	1	1	1
gluside_hs[g] -> galgluside_hs[g]	1	1	1	1	1	1	1	1	0	1	0	1	1	1	1	0	1	1	1	1
glx[m] -> glyclt[m]	1	1	1	0	0	0	0	0	0	0	0	0	0	0	0	0	0	0	0	0
gly[c] -> ser_L[c] -> pyr[c], 1	1	1	1	1	0	0	0	0	0	0	1	1	0	1	1	0	0	1	1	1
gly[c] -> ser_L[c] -> pyr[c], 2	1	1	1	1	1	1	1	1	1	1	1	1	1	1	1	1	1	1	1	1
glyc[c] -> glc_D[c]	1	1	1	1	1	1	1	1	1	1	1	1	1	1	1	1	1	1	1	1
glyc[c] + Rtotal[c] + Rtotal2[c] -> dag_hs[c]	1	1	1	1	0	1	1	1	0	1	0	1	1	1	1	0	1	1	1	1
glyc[c] + Rtotal[c] -> tag_hs[c]	1	1	1	0	0	0	0	0	0	0	0	0	0	0	0	0	0	0	0	0
glyclt[c] -> gly[c]	1	1	1	0	0	0	0	0	0	0	0	1	1	1	1	0	0	1	0	1
glygn2[c] -> glc_D[c]	1	1	1	1	1	1	1	1	1	1	1	1	1	1	1	1	1	1	1	1
glygn2[e] -> glc_D[e] - via AMY2e	1	1	1	1	1	0	1	1	1	0	1	1	1	1	1	1	1	1	1	1
glx[c] -> oxa[c]	1	1	1	1	1	1	1	1	1	1	0	1	1	1	1	1	1	1	1	1
ha[l] -> acgam[l] + glcur[l]	1	1	1	1	1	1	1	1	1	1	1	1	1	1	1	1	1	1	1	1
his_L[c] -> glu_L[c]	1	1	1	1	0	0	0	0	0	0	0	1	0	1	1	0	0	1	0	1
his_L[c] -> hista[c]	1	1	1	1	1	1	1	1	1	1	1	1	1	1	1	0	1	1	1	1
hista[c] -> 3mlda[c]	1	1	1	0	0	0	0	0	0	0	0	1	0	0	0	0	0	1	1	0
hista[c] -> im4ac[c]	1	1	1	0	0	0	0	0	0	0	0	0	0	0	0	0	0	0	0	0
hmgcoa[x] -> chsterol[r]	1	1	0	1	1	1	1	1	1	1	1	1	1	1	1	1	1	1	1	1
hmgcoa[x] -> frdp[x]	1	1	0	1	1	1	1	1	1	1	1	1	1	1	1	1	1	1	1	1
hmgcoa[x] -> xoldiolone[r]	1	1	0	1	0	0	0	0	0	0	0	0	0	0	0	0	0	0	0	1
hmgcoa(x) -> xoltriol[c]	1	1	0	1	1	1	1	1	1	1	1	1	1	1	1	1	1	1	1	1
hpyr[c] -> 2pg[c]	1	1	1	1	1	1	1	1	1	1	1	1	1	1	1	1	1	1	1	1
hpyr[c] -> glyclt[c]	1	1	1	1	1	1	1	1	1	0	0	1	0	1	1	1	1	1	1	1
hpyr[c] -> glyc_S[c]	1	1	1	1	1	1	1	1	1	1	1	1	1	1	1	1	1	1	1	1
hspg[l] -> gal[l] + glcur[l] + xyl_D[l]	0	0	0	0	0	0	0	0	0	0	0	0	0	0	0	0	0	0	0	0
hyptaur[c] -> taur[x]	1	1	1	1	0	1	0	1	0	1	0	1	1	1	1	0	1	1	1	1
ile_L[c] -> accoa[c]	1	1	1	0	0	0	0	0	1	0	0	0	0	1	0	0	0	0	0	0
inost[c] -> pail_hs[c]	1	1	1	0	0	0	0	0	0	0	0	0	0	0	0	0	0	0	0	0
inost[c] -> pail45p_hs[c]	1	1	1	0	0	0	0	0	0	0	0	0	0	0	0	0	0	0	0	0
inost[c] -> pail4p_hs[c]	1	1	1	0	0	0	0	0	0	0	0	0	0	0	0	0	0	0	0	0
inost[c] -> xu5p_D[c]	1	1	1	1	0	1	1	0	1	0	1	0	0	1	1	1	0	1	0	1
ipdp[x] -> sql[r]	1	1	1	1	1	1	1	1	1	1	1	1	1	1	1	1	1	1	1	0
itacon[m] -> pyr[m]	1	1	1	0	0	0	0	0	0	0	0	0	0	0	0	0	0	0	0	0
ksi[l] -> man[l] + acgam[l]	1	1	1	1	0	0	0	0	0	0	0	0	0	1	1	0	0	0	1	1
ksii_core2[l] -> Ser_Thr[l]	1	1	1	1	1	1	1	1	0	0	0	1	1	1	1	0	1	1	1	1
ksii_core4[l] -> Ser/Thr[l]	1	1	1	1	1	1	1	0	0	0	0	1	1	1	1	0	0	1	1	1
l2fn2m2masn(g) -> ksi(g)	1	1	1	1	0	0	0	0	0	0	0	0	0	0	1	0	0	0	0	1
lac_L[c] -> glc_D[c]	1	1	1	1	1	1	1	1	1	1	1	1	1	1	1	1	1	1	1	1
Lcyst[c] -> taur[x]	1	1	1	1	0	0	0	0	0	0	0	0	1	1	1	0	0	1	1	1
leu_L[c] -> accoa[c]	1	1	1	1	0	0	0	0	0	0	0	0	0	0	0	0	0	0	0	0
lys_L[c] -> accoa[m] (via saccrp-L pathway)	1	1	1	0	0	0	0	0	0	0	0	0	0	0	0	0	0	0	0	0
lys_L[x] -> aacoa[m] (via Lpipecol pathway)	1	1	1	0	0	0	0	0	0	0	0	0	1	0	1	0	0	0	0	0
m8masn[r] -> nm4masn[g]	1	1	1	1	0	0	0	0	0	0	0	0	0	1	1	0	0	0	1	1
man[c] -> gdpmann[c]	1	1	1	1	0	0	0	0	0	1	0	1	0	1	1	0	0	1	1	1
man6p[c] -> kdn[c] - via ACNAM9PL2	1	1	1	0	0	0	1	0	0	0	0	0	0	1	0	0	0	0	0	0
mescon[m] -> pyr[m]	1	1	1	0	0	0	0	0	0	0	0	0	0	0	0	0	0	0	0	0
met_L[c] -> cys_L[c]	1	1	1	0	0	0	0	0	0	0	0	1	0	1	1	0	0	1	1	1
mi145p[c] -> inost[c]	1	1	1	1	1	1	1	1	1	1	1	1	1	1	1	1	1	1	1	1
msa[m] -> ala_B[m]	1	1	1	1	0	0	0	0	0	0	1	1	0	0	1	1	0	1	1	1
mthgxl[c] -> 12ppd_S[c]	1	1	1	1	1	1	1	1	1	1	1	1	1	1	1	1	1	1	1	1
mthgxl[c] -> lac_D[c]	1	1	1	1	1	1	1	1	1	1	1	1	1	1	1	1	1	1	1	1
n2m2nmasn[l] -> man[l] + acgam[l]	1	1	1	0	0	0	0	0	0	0	0	0	0	0	0	0	0	0	0	0
nm4masn[g] -> l2fn2m2masn[g]	1	1	1	0	0	0	0	0	0	0	0	0	0	0	0	0	0	0	0	0
nm4masn[g] -> n2m2nmasn[g]	1	1	1	0	0	0	0	0	0	0	0	0	0	0	0	0	0	0	0	0
nm4masn[g] -> s2l2fn2m2masn[g]	1	1	1	0	0	0	0	0	0	0	0	0	0	0	0	0	0	0	0	0
o2- -> h2o2 -> o2 + h2o, 1	1	1	1	1	1	1	1	1	1	1	1	1	1	1	1	1	1	1	1	1
o2- -> h2o2 -> o2 + h2o, 2	1	1	1	1	1	1	1	1	1	1	1	1	1	1	1	1	1	1	1	1
orn[c] -> nh4[c]	1	1	1	1	1	1	1	1	1	1	1	1	1	1	1	1	1	1	1	1
orn[c] -> ptrc[c]	1	1	1	1	1	1	1	1	1	1	1	1	1	1	1	1	1	1	1	1
orn[c] -> spmd[c]	1	1	1	1	1	1	0	1	1	1	1	1	1	1	1	0	1	1	1	1
orn[c] -> sprm[c]	1	1	1	1	1	0	0	0	1	0	1	0	1	1	1	0	0	1	1	1
pail_hs[c] -> gpi_prot_hs[r]	1	1	1	0	0	0	1	0	0	0	0	0	0	0	0	0	0	0	0	0
pail45p[c] -> mi145p[c]	1	1	1	1	0	1	1	1	0	1	1	1	1	1	1	1	1	1	1	1
phe_L[c] -> pac[c]	1	1	1	1	1	1	1	1	1	1	1	1	1	1	1	1	1	1	1	1
phe_L[c] -> pacald[c]	1	1	1	1	1	1	1	1	1	1	1	1	1	1	1	1	1	1	1	1
phe_L[c] -> peamn[c]	1	1	1	1	1	1	1	1	1	1	1	1	1	1	1	1	1	1	1	1
phe_L[c] -> phaccoa[c]	1	1	1	0	0	0	0	0	0	0	0	0	0	0	0	0	0	0	0	0
phe_L[c] -> pheacgln[c]	1	1	1	1	0	0	0	0	0	0	0	0	0	1	1	1	0	1	0	1
phe_L[c] -> phpyr[c]	1	1	1	0	0	0	0	0	0	0	0	0	0	0	0	0	0	0	0	0
phe_L[c] -> tyr_L[c]	1	1	1	1	0	0	0	0	0	0	0	0	0	0	1	0	0	0	0	1
pheme[c] -> bilirub[c]	1	1	0	1	1	1	0	1	0	1	1	1	1	1	1	1	1	1	1	1
phytcoa[x] -> dmnoncoa[m]	1	1	1	1	1	1	1	1	1	1	1	1	1	1	1	1	1	1	1	1
pmtcoa[c] -> crmp_hs[c]	1	1	0	1	0	0	0	0	0	0	0	1	0	0	1	0	0	0	0	1
pmtcoa[c] -> sphmyln_hs[c]	1	1	0	1	1	0	0	0	0	0	0	1	1	1	1	0	0	0	1	1
ppcoa[m] -> succoa[m]	1	1	1	1	1	1	1	1	1	1	1	1	1	1	1	1	1	1	1	1
pro_L[c] -> glu_L[c]	1	1	1	1	0	0	1	0	1	0	1	1	0	1	1	1	0	1	0	1
ptrc[c] -> ala_B[c]	1	1	1	1	0	1	0	1	0	1	1	1	0	1	1	0	1	1	1	1
ptrc[c] -> spmd[c]	1	1	1	1	0	1	0	1	1	1	1	1	0	1	1	0	1	1	1	1
pyr[c] -> fad[m] + h[m]	0	0	0	0	0	0	0	0	0	0	0	0	0	0	0	0	0	0	0	0
pyr[c] -> lac_D[c]	1	1	1	1	0	0	1	1	1	0	1	1	1	1	1	1	0	1	1	1
pyr -> nad[m] + h[m]	0	0	0	0	0	0	0	0	0	0	0	0	0	0	0	0	0	0	0	0
pyr[c] -> accoa[m] + co2[c] + nadh[m]	0	0	0	0	0	0	0	0	0	0	0	0	0	0	0	0	0	0	0	0
pyr[c] -> ala_L[c], 1	1	1	1	1	0	0	1	0	1	0	1	1	1	1	1	1	0	1	1	1
pyr[c] -> ala_L[c], 2	1	1	1	1	1	1	1	1	1	1	1	1	1	1	1	1	1	1	1	1
s2l2fn2m2masn[l] -> man[l] + acgam[l]	1	1	1	0	0	0	0	0	0	0	0	0	0	1	1	0	0	0	1	1
Ser/Thr[g] + udpacgal[g] -> core2[g] - via GALNTg and DM_core4[g]	0	0	0	0	0	0	0	0	0	0	0	0	0	0	0	0	0	0	0	0
Ser/Thr[g] + udpacgal[g] -> core4[g] - via GALNTg and DM_core4[g]	1	1	0	1	1	1	1	1	1	1	1	1	1	1	1	1	1	1	1	1
Ser/Thr[g] + udpacgal[g] -> Tn_antigen[g] - via GALNTg	0	0	0	0	0	0	0	0	0	0	0	0	0	0	0	0	0	0	0	0
Ser_Thr[g] + udpacgal[g] -> sTn_antigen[g] - via GALNTg and DM_sTn_antigen[g]	0	0	0	0	0	0	0	0	0	0	0	0	0	0	0	0	0	0	0	0
Ser-Gly/Ala-X-Gly[r] -> cs_pre[g]	1	1	0	0	0	0	0	0	0	0	0	0	0	0	0	0	0	0	0	0
Ser_Gly_Ala_X_Gly[r] -> cspg_a[g]	1	1	0	0	0	0	0	0	0	0	0	0	0	0	0	0	0	0	0	0
Ser-Gly/Ala-X-Gly[r] -> cspg_c[g]	1	1	0	0	0	0	0	0	0	0	0	0	0	0	0	0	0	0	0	0
Ser_Gly_Ala_X_Gly[r] -> cspg_d[g]	1	1	0	0	0	0	0	0	0	0	0	0	0	0	0	0	0	0	0	0
Ser_Gly_Ala_X_Gly[r] -> cspg_e[g]	1	1	0	0	0	0	0	0	0	0	0	0	0	0	0	0	0	0	0	0
Ser_Gly_Ala_X_Gly[r] -> hspg[g]	1	1	0	0	0	0	0	0	0	0	0	0	0	0	0	0	0	0	0	0
Ser_Gly_Ala_X_Gly[r] -> cspg_b[g]	1	1	0	0	0	0	0	0	0	0	0	0	0	0	0	0	0	0	0	0
ser_L[c] -> cys_L[c]	0	0	0	0	0	0	0	0	0	0	0	0	0	0	0	0	0	0	0	0
so4[c] -> paps[c]	1	1	1	1	0	0	0	0	0	0	0	0	0	1	0	0	0	1	1	1
spmd[c] -> sprm[c]	1	1	1	1	0	0	0	0	0	0	0	0	0	0	1	0	0	1	0	1
srtn[c] -> f5hoxkyn[c]	1	1	1	0	0	0	0	0	0	0	0	0	0	0	0	0	0	0	0	0
srtn[c] -> fna5moxam[c]	0	0	0	0	0	0	0	0	0	0	0	0	0	0	0	0	0	0	0	0
srtn[c] -> nmthsrtn[c]	1	1	1	1	0	0	0	0	0	0	0	0	0	0	1	0	0	0	0	1
strch1[e] -> glc_D[e] via AMY1e	1	1	1	1	1	0	1	1	1	0	1	1	1	1	1	1	1	1	1	1
succoa[m] -> oaa[m]	1	1	0	1	1	1	1	1	1	1	1	1	1	1	1	1	1	1	1	1
taur[x] -> tchola[x]	1	1	1	0	0	1	0	0	0	0	0	1	0	1	0	0	0	0	0	0
thcholstoic[x] -> gchola[x]	1	1	1	0	0	0	1	0	0	0	0	0	1	0	1	0	0	1	1	0
thcholstoic[x] -> tchola[x]	1	1	1	1	0	0	0	0	0	0	0	0	0	0	0	0	0	0	0	1
trp_L[c] -> ppcoa[c]	1	0	0	0	0	0	0	0	0	0	0	0	0	0	1	0	0	0	0	0
trp_L[c] -> accoa[c]	1	1	1	0	0	0	0	0	0	0	0	0	0	0	1	0	0	0	0	1
trp_L[c] -> anth[c]	1	1	1	1	0	0	0	0	0	0	0	0	0	0	1	0	0	0	0	0
trp_L[c] -> id3acald[c]	1	1	1	0	0	0	0	0	0	0	0	0	0	0	0	0	0	0	0	0
trp_L[c] -> kynate[c]	1	1	1	1	0	1	0	0	0	0	0	0	0	0	1	0	0	0	0	1
trp_L[c] -> melatn[c]	0	0	0	0	0	0	0	0	0	0	0	0	0	0	0	0	0	0	0	0
trp_L[c] -> Lfmkynr[c]	1	1	1	1	1	1	1	0	1	0	1	0	1	1	1	0	0	1	1	1
trp_L[c] -> Lkynr[c]	1	1	1	1	1	1	1	0	1	0	1	0	1	1	1	0	0	1	1	1
trp_L[c] -> nformanth[c]	1	1	1	1	0	0	0	0	0	0	0	0	0	0	1	0	0	0	0	0
srtn[c] -> 5moxact[c]	0	0	0	0	0	0	0	0	0	0	0	0	0	0	0	0	0	0	0	0
srtn[c] -> 6hoxmelatn[c]	0	0	0	0	0	0	0	0	0	0	0	0	0	0	0	0	0	0	0	0
trp_L[c] -> quln[c]	1	1	1	1	0	1	1	0	1	0	1	0	0	0	1	0	0	0	0	1
trp_L[c] -> srtn[c]	1	1	1	1	0	0	0	1	0	1	0	1	1	1	1	0	1	1	1	1
Tyr_ggn[c] -> glygn2[c]	0	0	0	0	0	0	0	0	0	0	0	0	0	0	0	0	0	0	0	0
tyr_L[c] -> 34hpp[c]	1	1	1	1	0	1	1	1	1	1	1	1	1	1	1	1	1	1	1	1
tyr_L[c] -> 4hphac[c]	1	1	1	1	1	1	1	1	1	1	1	1	1	1	1	1	1	1	1	1
tyr_L[c] -> adrnl[c]	1	1	1	1	0	0	0	0	0	0	0	0	0	0	1	0	0	0	0	1
tyr_L[c] -> dopa[c]	1	1	1	1	0	0	0	1	0	0	0	0	0	0	1	0	0	0	0	1
tyr_L[c] -> fum[c] + acac[c]	1	1	1	1	0	1	1	1	1	1	1	1	1	1	1	1	1	1	1	1
tyr_L[c] -> melanin[c]	1	1	1	1	0	0	0	0	0	0	0	0	0	0	1	0	0	0	0	1
tyr_L[c] -> nrpphr[c]	1	1	1	1	0	0	0	0	0	0	0	0	0	0	1	0	0	0	0	1
uacgamv[c] + udpglcur[c] -> ha[e] - via HAS2	1	1	1	0	0	0	0	0	0	0	0	0	0	0	0	0	0	0	1	0
uacgam[c] -> m8masn[r]	1	1	1	1	1	1	1	1	1	1	1	1	1	1	1	1	1	1	1	1
udpglcur[c] -> xu5p_D[c]	1	1	1	1	1	1	1	0	1	0	1	0	1	1	1	1	0	1	1	1
ura[c] -> ala_B[c]	1	1	1	1	1	1	1	1	1	1	1	1	1	1	1	1	1	1	1	1
val_L[c] -> 3aib[c]	1	1	1	1	0	1	0	1	0	1	0	1	0	0	1	0	1	1	1	1
val_L[c] -> succoa[m]	1	1	1	0	0	0	0	0	0	0	0	0	0	1	0	0	0	0	0	1
xoltriol[m] -> thcholstoic[m]	1	1	1	1	1	1	1	1	1	1	1	1	1	1	1	1	1	1	1	1
xylu_D[c] -> glyclt[c]	1	1	1	1	1	1	1	1	1	1	1	1	1	1	1	1	1	1	1	1
glucose to lactate conversion	1	1	0	1	0	1	0	0	0	0	1	1	0	1	0	0	0	1	0	0
glutamine to glucose conversion - ASPTAm	1	1	1	1	0	1	1	1	1	1	1	1	1	1	1	1	1	1	1	1
glutamine to glucose conversion - FUM	1	1	1	1	1	1	1	1	1	1	1	1	1	1	1	1	1	1	1	1
glutamine to glucose conversion - MDH	1	1	1	1	0	0	1	1	1	1	1	1	1	0	1	1	1	1	0	1
glutamine to glucose conversion - G6PPer	1	1	1	1	0	1	0	1	0	1	0	1	0	0	1	0	1	0	1	1
glutamine to proline conversion - P5CRm	1	1	1	1	1	0	1	0	0	0	0	0	1	1	0	1	0	0	0	1
glutamine to proline conversion - P5CRxm	1	1	1	1	1	1	1	1	0	0	0	1	1	1	0	0	1	0	0	0
glutamine to ornithine conversion - ORNTArm	1	1	1	0	0	1	0	0	0	0	0	1	0	1	0	0	0	1	0	0
glutamine to citrulline converion - OCBTm	1	1	1	1	0	0	0	0	0	0	0	1	0	1	1	0	0	1	1	1
glutamine to lactate - LDH_L	1	1	0	1	0	0	1	0	1	0	0	1	0	0	1	1	0	1	0	1
glutamine to aspartate - ASPTA	1	1	1	1	0	0	1	1	1	1	1	1	1	0	1	1	1	1	0	1
glutamine to co2 - AKGDm	1	1	1	1	0	1	0	0	1	1	0	1	0	1	0	0	0	1	0	0
glutamine to ammonia - GLUNm	1	1	1	1	1	0	1	0	1	0	1	0	1	1	1	1	0	1	1	1
putriscine to methionine (depends on oxygen uptake) - UNK2	1	1	1	0	0	0	0	0	0	0	0	0	0	1	0	0	0	0	0	0
basolateral secretion of alanine	0	0	0	0	0	0	0	0	0	0	0	0	0	0	0	0	0	0	0	0
basolateral secretion of lactate	1	1	0	0	0	1	0	1	0	0	0	1	1	1	1	0	0	1	1	0
synthesis of arginine from glutamine - ARGSL	1	1	1	1	0	1	0	0	0	0	0	1	1	1	1	0	0	1	1	1
synthesis of proline from glutamine - P5CR	1	1	1	1	1	1	1	1	1	1	1	1	1	1	1	0	1	1	1	1
synthesis of proline from glutamine - P5CRm	1	1	1	1	1	0	1	0	0	0	0	0	1	1	0	1	0	0	0	1
synthesis of proline from glutamine - P5CRxm	1	1	1	1	1	1	1	1	0	0	0	1	1	1	0	0	1	0	0	0
synthesis of alanine from glutamine - ALATA_L	1	1	0	1	1	1	1	1	1	1	1	1	0	1	1	1	1	0	1	1
basolateral secretion of proline	1	1	1	0	0	0	0	0	0	0	0	0	0	0	0	0	0	0	0	0
basolateral secretion of arginine	1	1	1	0	0	1	0	0	0	0	0	1	0	1	0	0	0	1	0	0
basolateral secretion of ornithine	1	1	0	0	0	0	0	0	0	0	0	0	0	0	0	0	0	0	0	0
synthesis of spermine from ornithine - SPRMS	1	1	1	0	0	0	0	0	0	0	0	0	0	1	0	0	0	1	1	0
synthesis of spermidine from ornithine - SPMS	1	1	1	0	0	0	0	0	0	0	0	1	0	1	1	0	0	1	1	0
synthesis of nitric oxide from arginine - NOS2	1	1	1	1	1	1	1	1	1	1	1	1	0	0	1	1	1	1	0	1
synthesis of cholesterol - DSREDUCr	1	1	0	0	0	1	0	0	1	0	0	1	0	1	0	0	0	1	0	0
de novo purine synthesis - ADSL1	1	1	1	1	1	0	1	0	1	0	1	1	1	1	1	1	0	1	1	1
de novo purine synthesis - GMPS2	1	1	1	1	1	0	1	0	1	0	1	0	1	1	1	1	0	1	1	1
salvage of purine bases - ADPT	1	1	1	1	1	0	0	0	0	0	0	1	1	1	1	0	0	1	1	1
salvage of purine bases - GUAPRT	1	1	1	1	1	0	1	0	1	0	1	0	1	1	1	0	0	1	0	1
salvage of purine bases - HXPRT	1	1	1	1	1	0	1	0	1	0	1	0	1	1	1	0	0	1	1	1
purine catabolism - XAOx	1	1	1	1	0	1	1	0	1	0	1	0	0	0	1	1	1	0	0	1
pyrimidine synthesis (with hco3 uptake) - TMDS	1	1	1	1	0	0	0	0	0	0	0	0	0	1	1	0	0	0	0	1
pyrimidine synthesis (with hco3 uptake) - CTPS2	1	1	1	1	0	0	0	0	1	0	1	0	0	1	1	0	0	1	1	1
pyrimidine catabolism - UPPN	1	1	1	1	0	0	1	0	1	0	1	0	0	1	1	0	0	0	1	1
pyrimidine catabolism - BUP2	1	1	1	1	0	0	0	0	0	0	0	0	0	0	0	0	0	0	0	0
fructose to glucose conversion - TRIOK	1	1	1	0	1	0	1	1	1	1	1	1	0	0	0	1	1	0	0	0
uptake and secretion of cholic acid - CHOLATEt3	1	1	1	1	0	1	1	0	1	0	1	1	0	1	1	1	0	0	0	1
uptake and secretion of cholic glycocholate - GCHOLAt3	1	1	1	1	0	1	1	1	1	1	1	1	0	1	1	1	1	0	0	1
uptake and secretion of tauro-cholate - TCHOLAt3	1	1	1	1	0	1	1	1	1	1	1	1	0	0	1	1	1	0	1	1
Synthesis of fructose-6-phosphate from erythrose-4-phosphate (HMP shunt) - TKT2	1	1	1	1	0	1	0	0	0	0	1	0	0	1	0	0	0	1	0	0
Malate to pyruvate (malic enzyme) - ME2	1	1	1	1	0	1	1	1	1	1	1	1	1	0	1	1	1	1	0	1
Malate to pyruvate (malic enzyme) - ME2m	1	1	1	1	0	1	0	1	0	1	0	1	1	1	1	0	1	1	1	1
Synthesis of urea (urea cycle) - ARGN	1	1	1	1	0	0	0	0	0	0	0	1	0	0	1	0	0	1	1	1
Cysteine to pyruvate - 3SPYRSP	0	0	0	0	0	0	0	0	0	0	0	0	0	0	0	0	0	0	0	0
Methionine to cysteine - CYSTGL	0	0	0	0	0	0	0	0	0	0	0	0	0	0	0	0	0	0	0	0
Synthesis of triacylglycerol (TAG reformation) - DGAT	1	1	1	1	1	1	1	1	1	1	1	1	1	1	1	1	1	1	1	1
Phosphatidylcholine synthesis - PETOHMm_hs	1	1	1	0	0	0	0	0	0	0	0	1	0	1	0	0	0	1	0	0
Synthesis of FMN from riboflavin - RBFK	1	1	0	1	1	0	1	0	1	0	1	0	1	1	0	1	0	1	1	0
synthesis of FAD from riboflavin - FMNAT	1	1	1	1	0	1	1	1	1	1	1	1	1	1	1	1	1	1	1	1
Synthesis of 5-methyl-tetrahydrofolate from folic acid - MTHFR3	1	1	1	1	1	0	0	0	0	0	1	0	1	1	1	1	0	1	1	1
Putriscine to GABA - ABUTD	1	1	1	1	0	0	0	0	0	0	0	1	1	1	0	0	0	1	1	0
Superoxide dismutase - SPODMm	0	0	0	0	0	0	0	0	0	0	0	0	0	0	0	0	0	0	0	0
Availability of bicarbonate from Carbonic anhydrase reaction - H2CO3Dm	1	1	1	1	1	1	1	1	1	1	1	1	1	1	1	1	1	1	1	1
Regeneration of citrate (TCA cycle) - CSm	1	1	1	1	1	1	1	1	1	1	1	1	1	1	1	1	1	1	1	1
Imidazolone to N-Formimidoyl-L-glutamate (IZPN)	0	0	0	0	0	0	0	0	0	0	0	0	0	0	0	0	0	0	0	0
binding of guar gum fiber to bile acids - EX_GUMGCHOL(e)	1	1	1	0	0	0	0	0	0	0	0	0	0	0	0	0	0	0	0	0
binding of guar gum fiber to bile acids - GUMTCHOLe	0	0	0	0	0	0	0	0	0	0	0	0	0	0	0	0	0	0	0	0
binding of psyllium fiber to bile acids - PSYGCHe	1	1	1	0	0	0	0	0	0	0	0	0	0	0	0	0	0	0	0	0
binding of psyllium fiber to bile acids - PSYTCHe	1	1	1	0	0	0	0	0	0	0	0	0	0	0	0	0	0	0	0	0
binding of psyllium fiber to bile acids - PSYTDECHe	1	1	1	0	0	0	0	0	0	0	0	0	0	0	0	0	0	0	0	0
binding to beta glucan fibers to bile acids - BGLUGCHe	1	1	1	0	0	0	0	0	0	0	0	0	0	0	0	0	0	0	0	0
binding to beta glucan fibers to bile acids - BGLUTCHLe	1	1	1	0	0	0	0	0	0	0	0	0	0	0	0	0	0	0	0	0
binding to beta glucan fibers to bile acids - BGLUTDECHOe	1	1	1	0	0	0	0	0	0	0	0	0	0	0	0	0	0	0	0	0
binding of pectin fiber to bile acids - PECGCHLe	1	1	1	0	0	0	0	0	0	0	0	0	0	0	0	0	0	0	0	0
binding of pectin fiber to bile acids - PECTCHLe	1	1	1	0	0	0	0	0	0	0	0	0	0	0	0	0	0	0	0	0
binding of pectin fiber to bile acids - PECDCHe	0	0	0	0	0	0	0	0	0	0	0	0	0	0	0	0	0	0	0	0
heme synthesis - FCLTm	0	0	0	0	0	0	0	0	0	0	0	0	0	0	0	0	0	0	0	0
heme degradation - HOXG	1	1	1	0	0	0	0	0	0	0	0	1	0	1	0	0	0	1	0	0
secretion of lactate	1	1	0	1	1	1	1	1	1	1	1	1	1	1	1	1	1	1	1	1
secretion of hyaluronic acid	1	1	1	1	1	0	0	1	0	0	0	0	0	0	1	0	0	0	1	1
secretion of fructuose	1	1	1	1	1	1	1	1	1	1	1	1	1	1	1	1	1	1	1	1
secretion of sorbitol	1	1	1	1	1	1	1	1	1	1	1	1	1	1	1	1	1	1	1	1
secretion of estradiol	1	1	1	1	0	1	0	1	0	1	0	1	1	1	1	0	1	1	1	1
secretion of androgen	1	1	1	1	0	1	0	1	0	1	0	1	1	1	1	0	1	1	1	1
secretion of testosterone	1	1	1	1	0	0	0	1	0	1	0	1	1	1	1	0	1	1	1	1
secretion of pyruvate	1	1	1	1	1	1	1	1	1	1	1	1	1	1	1	1	1	1	1	1
secretion of progesterone	1	1	1	1	0	1	0	1	0	1	1	1	1	1	1	1	1	1	1	1
Total number of functions that carry flow	338	337	305	246	136	160	173	149	168	138	166	188	180	223	238	154	147	206	198	239

## Sheet: Plasma Composition
Metabolic functions	Oocyte					Somatic cells					Mural cells		Cumulus cells
	Primordial	Primary	Secondary	Small Antral	Large Antral	Primordial	Primary	Secondary	Small Antral	Large Antral	Small Antral	Large Antral	Small Antral	Large Antral	NSN	SN
ATP max, aerobic, glc	1	1	1	1	1	1	1	1	1	1	1	1	1	1	1	1
ATP max, anaerobic, glc	0	0	1	0	1	0	1	0	1	1	1	1	0	1	1	1
ATP max, aerobic, citrate	1	1	1	1	1	1	1	1	1	1	1	1	1	1	1	1
ATP max, aerobic, etoh	1	1	1	1	1	1	1	1	1	1	1	1	1	1	1	1
ATP max, aerobic, glu_L	1	1	1	1	1	1	1	1	1	1	1	1	1	1	1	1
ATP max, aerobic, gln_L	1	1	1	1	1	1	1	1	1	1	1	1	1	1	1	1
ATP max, aerobic, gly	1	1	1	1	1	1	1	1	1	1	1	1	1	1	1	1
ATP max, aerobic, lac_L	1	1	1	1	1	1	1	1	1	1	1	1	1	1	1	1
ATP max, aerobic, pro-L	1	1	1	1	1	1	1	1	1	1	1	1	1	1	1	1
ATP max, aerobic, pyruvate	1	1	1	1	1	1	1	1	1	1	1	1	1	1	1	1
ATP production via electron transport chain	0	0	0	0	0	0	0	0	0	1	0	0	0	1	0	0
gthrd reduces h2o2, GTHP (c)	1	0	1	0	0	0	0	0	1	1	1	0	0	1	1	1
gthrd reduces h2o2, GTHP (e)	0	1	0	1	0	0	0	1	0	0	0	0	0	0	0	0
gthrd reduces h2o2, GTHP (m)	1	1	1	1	1	1	1	1	1	1	1	1	1	1	1	1
gly -> co2 + nh4	1	1	1	1	1	1	1	1	1	1	1	1	1	1	1	1
Biomass	1	1	1	1	1	1	1	1	1	1	1	1	1	1	1	1
Biomass from pyruvate	1	1	1	1	1	1	1	1	1	1	1	1	1	1	1	1
Test human biomass	0	0	0	0	0	0	0	0	0	0	0	0	0	0	0	0
12ppd_S[c] -> mthgxl[c]	0	1	1	1	1	1	0	1	1	1	1	1	1	1	1	1
12ppd_S[c] -> pyr[c]	1	1	1	1	1	1	1	1	1	1	1	1	1	1	1	1
3pg[c] -> gly[c]	0	0	1	1	1	0	1	1	1	1	1	1	0	1	1	1
3pg[c] -> ser_L[c]	0	0	1	0	1	0	1	1	1	1	1	1	0	1	1	1
4abut[c] -> succ[m]	0	1	0	1	0	1	1	1	1	1	1	0	1	1	1	1
4hpro_LT[m] -> glx[m]	0	0	0	0	0	0	0	0	0	0	1	1	0	0	0	0
5aop[c] -> pheme[c]	1	1	1	1	1	1	1	1	1	1	1	1	1	1	1	1
aact[c] -> mthgxl[c]	1	1	0	1	0	1	0	1	0	1	1	0	1	0	1	1
acac[m] -> acetone[m]	0	0	1	0	1	0	1	0	1	1	0	1	0	1	1	0
acac[m] -> bhb[m]	1	0	1	0	1	0	1	0	0	0	1	1	0	1	1	1
acald[c] -> ac[c]	1	1	1	1	1	1	1	1	1	1	1	1	1	1	1	1
accoa[c] -> pmtcoa[c]	0	1	1	0	1	0	1	0	1	1	1	1	0	1	1	1
pmtcoa[c] -> malcoa[m]	1	1	1	1	1	1	1	1	1	1	1	1	1	1	1	1
acetone[c] -> mthgxl[c]	0	0	1	0	1	0	1	0	1	1	1	1	0	1	1	1
acgal[c] -> udpacgal[c]	0	0	0	0	0	1	0	0	0	1	1	1	0	0	0	1
acgam[c] -> cmpacna[c]	0	0	1	0	0	0	0	0	0	1	1	1	0	0	0	1
acorn[c] -> orn[c]	0	0	0	0	0	0	0	0	0	0	0	0	0	0	0	0
adrnl[c] -> 34dhoxpeg[c]	0	1	0	1	0	1	0	1	1	1	1	0	1	1	1	1
akg[c] -> glu-L[c] (ALATA_L)	1	1	1	1	1	1	1	1	0	1	1	1	1	0	1	1
akg[c] -> glu-L[c] (ASPTA)	0	0	1	1	1	1	1	1	1	0	1	1	1	1	0	1
akg[m] -> oaa[m]	1	1	1	1	1	1	1	1	1	1	1	1	1	1	1	1
akg[m] -> glu_L[m]	1	0	1	0	1	0	1	1	1	1	1	1	1	1	1	1
akg[m] -> glu_L[m] (ASPTAm)	0	1	1	1	1	1	1	1	1	1	1	1	1	1	1	1
ala_B[c] -> msa[m]	0	1	1	1	1	1	1	1	1	1	1	1	1	1	1	1
ala_D[c] -> pyr[c]	1	0	1	0	1	0	1	1	1	1	1	1	1	1	1	1
ala_L[c] -> ala_D[c]	1	0	1	0	1	0	1	1	1	1	1	1	1	1	1	1
ala_L[c] -> pyr[c]	1	1	1	1	1	1	1	1	1	1	1	1	1	1	1	1
arachd[c] -> malcoa[m]	1	1	0	0	0	0	0	0	1	1	0	0	0	0	0	0
arachd[r] -> txa2[r]	0	0	0	0	0	0	0	0	0	0	1	0	0	0	0	1
arg_L[c] -> creat[c]	0	1	0	1	0	1	0	1	1	1	1	0	1	0	1	1
arg_L -> glu_L [m]	1	1	0	1	1	1	1	1	1	1	1	0	1	1	1	1
arg_L -> no	1	1	0	1	1	1	0	1	1	1	1	0	1	1	1	1
arg_L[c] -> pcreat[c]	0	0	0	0	0	0	0	0	1	1	1	0	0	0	1	1
ascb_L[c] -> eryth[c]	0	0	0	0	0	0	0	0	0	0	0	0	0	0	0	0
ascb_L[c] -> lyxnt[c]	0	0	0	0	0	0	0	0	0	0	0	0	0	0	0	0
ascb_L[c] -> thrnt[c]	0	0	0	0	0	0	0	0	0	0	0	0	0	0	0	0
ascb_L[c] -> xylnt[c]	0	0	0	0	0	0	0	0	0	0	0	0	0	0	0	0
asn_L[c] -> oaa[c]	1	1	1	1	1	1	1	1	1	1	1	1	1	1	1	1
asp_L[c] + hco3[c] -> arg_L[c]	0	1	0	1	0	1	0	1	1	1	1	0	1	1	1	1
asp_L[c] -> ala_B[c]	1	1	1	1	1	1	1	1	1	1	1	1	1	1	1	1
asp-L[c] -> asn-L[c]	1	0	1	0	0	0	1	0	1	1	0	1	0	1	1	0
asp_L[c] -> argsuc[c], asp-L -> fum (via argsuc), 1	0	1	0	1	0	1	0	1	1	1	1	0	1	1	1	1
argsuc[c] -> fum[c], asp-L -> fum (via argsuc), 2	0	1	0	1	0	1	0	1	1	1	1	0	1	1	1	1
asp_L[c] -> dcamp[c], asp_L -> fum (via dcamp), 1	1	1	1	0	1	0	1	0	1	1	1	1	0	1	1	1
dcamp[c] -> fum[c], asp_L -> fum (via dcamp), 2	1	1	1	1	1	1	1	1	1	1	1	1	1	1	1	1
dcamp[c] -> fum[c], asp_L -> fum (via dcamp), 3	1	0	1	0	1	0	1	1	1	1	1	1	0	1	1	1
asp_L[c] -> oaa[c]	1	1	1	1	1	1	1	1	1	1	1	1	1	1	1	1
carn -> ala_B	0	0	1	1	1	1	1	1	1	1	1	1	0	1	1	1
chol[c] + dag_hs[c] -> pe_hs[c]	0	0	1	0	0	0	0	0	0	0	0	0	0	0	0	0
choline -> betaine (glyb) -> glycine, 1 [m]	1	0	1	0	1	0	1	0	0	0	1	1	0	1	0	1
choline -> betaine (glyb) -> glycine, 2 [m]	0	0	1	0	1	0	0	0	0	0	1	0	0	1	0	1
coke[r] -> pecgoncoa[r]	0	0	0	0	0	0	0	0	0	0	0	0	0	0	0	0
core2[g] -> ksii_core2[g]	1	1	0	0	0	0	0	1	1	1	1	0	0	1	0	1
core4[g] -> ksii_core4[g]	0	0	0	0	0	0	0	0	1	1	1	0	0	1	0	1
cspg_a[ly] -> gal[ly] + glcur[ly] + xyl_D[ly]	1	1	0	1	0	0	0	1	1	1	1	0	1	1	1	1
cspg_b[ly] -> gal[ly] + glcur[ly] + xyl_D[ly]	0	0	0	0	0	0	0	0	0	0	0	0	0	0	0	0
cspg_c[ly] -> gal[ly] + glcur[ly] + xyl_D[ly]	0	1	0	0	0	0	0	1	0	0	0	0	1	0	0	1
cspg_d[ly] -> gal[ly] + glcur[ly] + xyl_D[ly]	0	1	0	0	0	0	0	1	0	0	0	0	1	0	0	1
cspg_e[ly] -> gal[ly] + glcur[ly] + xyl_D[ly]	0	1	0	0	0	0	0	1	0	0	0	0	1	0	0	1
cys-L + glu-L + gly -> ghtrd	1	1	1	1	1	1	1	1	1	1	1	1	1	1	1	1
cys-L -> 3sala -> so4, 1	1	1	1	1	1	1	1	1	1	1	1	1	1	1	1	1
cys-L -> 3sala -> so4, 2	1	1	1	1	1	1	1	1	1	1	1	1	1	1	1	1
cys_L[c] -> hyptaur[c]	1	1	1	1	1	1	1	1	1	1	1	1	1	1	1	1
cystine (Lcystin) -> cys-L	1	1	1	1	1	1	1	1	1	1	1	1	1	1	1	1
dhap[c] -> mthgxl[c]	0	0	1	1	1	0	1	1	1	1	1	1	0	1	1	1
dmpp[c] -> ggdp[c]	0	0	0	0	0	0	0	0	0	0	0	0	0	0	0	0
dna[n] -> dna5mtc[n]	0	0	0	0	0	0	0	0	0	0	0	0	0	0	0	0
dolichol_L[c] -> dolmanp_L[r]	0	0	0	0	0	0	0	0	0	0	0	0	0	0	0	0
dolichol_L[c] -> g3m8mpdol_L[r]	0	0	0	0	0	0	0	0	0	0	0	0	0	0	0	0
dolichol_U[c] -> dolmanp_U[r]	0	0	0	0	0	0	0	0	0	0	0	0	0	0	0	0
dolichol_U[c] -> g3m8mpdol_U[r]	0	0	0	0	0	0	0	0	0	0	0	0	0	0	0	0
dopa[c] -> homoval[c]	0	0	0	0	0	0	0	0	0	0	0	0	0	0	0	0
etoh[c] -> acald[c]	1	1	1	1	1	1	1	1	1	1	1	1	1	1	1	1
f6p[c] + g3p[c] -> r5p[c]	1	1	1	1	1	1	1	1	1	1	1	1	1	1	1	1
frdp[c] -> dolichol_L[r]	0	0	0	0	0	0	0	0	0	0	0	0	0	0	0	0
frdp[c] -> dolichol_U[r]	0	0	0	0	0	0	0	0	0	0	0	0	0	0	0	0
ade[c] -> amp[c]	0	0	0	0	1	0	0	0	0	0	1	1	0	0	0	1
adn[c] -> urate[x]	0	1	1	0	1	0	1	0	0	0	1	0	0	0	0	1
adp[c] -> datp[n]	0	0	0	0	0	0	0	0	0	0	0	0	0	0	0	0
cdp[c] -> dctp[n]	1	0	1	0	1	0	1	0	1	1	1	1	0	1	1	1
cmp[c] -> cytd[c]	1	1	1	1	1	1	1	1	1	1	1	1	1	1	1	1
cytd[c] -> ala_B[c]	0	0	0	0	1	0	1	1	1	1	1	0	0	1	1	1
dcmp[c] -> ala_B[c]	0	0	0	0	0	1	1	0	1	1	1	0	0	1	0	1
gdp[c] -> dgtp[n]	0	0	0	0	0	0	0	0	0	0	0	0	0	0	0	0
gln-L + HCO3 -> UMP[c]	1	1	1	1	1	1	1	1	0	1	1	1	1	0	1	1
gsn[c] -> urate[x]	0	0	1	0	1	0	1	0	0	0	1	0	1	0	0	1
gua[c] -> gmp[c]	0	0	0	0	1	0	0	0	0	0	0	0	0	0	0	0
hxan[c] -> imp[c]	0	0	0	0	0	0	0	1	0	0	0	0	0	0	0	0
imp[c] -> atp[c]	0	0	0	0	0	0	0	0	0	0	0	0	0	0	0	0
imp[c] -> gtp[c]	1	1	1	1	1	1	1	1	1	1	1	1	1	1	1	1
imp[c] -> urate[x]	0	0	1	0	1	0	1	0	0	0	1	0	0	0	0	1
prpp[c] -> imp[c]	0	1	1	0	1	0	1	0	1	1	1	1	0	1	1	1
pydx[c] -> pydx5p[c]	0	0	1	0	1	0	0	0	1	1	1	0	0	1	1	1
thm[c] -> thmpp[c]	1	1	1	1	1	1	1	1	1	1	1	1	1	1	1	1
thm[e] -> thmpp[m]	0	0	0	0	0	0	0	0	0	0	0	0	0	0	0	0
thmmp[e] -> thmpp[c]	0	0	0	1	0	0	0	0	0	0	0	0	0	0	0	0
thmmp[e] -> thmpp[m]	0	0	0	0	0	0	0	0	0	0	0	0	0	0	0	0
tyr_L[m] -> q10[m]	0	0	0	0	0	0	0	0	0	0	0	0	0	0	0	0
udp[c] -> dttp[n]	0	0	0	0	0	0	0	0	0	0	0	0	0	0	0	0
ump[c] -> ala_B[c]	0	1	1	0	1	0	1	1	1	1	1	0	0	1	1	1
fru[c] -> dhap[c]	1	1	1	1	1	1	1	1	1	1	1	1	1	1	1	1
fru[c] -> g3p[c]	1	1	1	1	1	1	1	1	1	1	1	1	1	1	1	1
fuc_L[c] -> gdpfuc[c]	0	0	0	0	0	0	0	0	0	1	1	0	0	1	1	1
fum[m] -> oaa[m]	1	1	1	1	1	1	1	1	1	1	1	1	1	1	1	1
g1p[c] -> dtdprmn[c]	0	0	0	0	0	0	0	0	0	0	0	0	0	0	0	0
g3p[c] -> mthgxl[c]	0	0	1	1	1	0	1	1	1	1	1	1	0	1	1	1
g6p[c] -> r5p[c]	1	1	1	1	1	1	1	1	1	1	1	1	1	1	1	1
g6p[c] -> ru5p_D[c]	1	1	1	1	1	1	1	1	1	1	1	1	1	1	1	1
gal[c] -> glc_D[c]	1	1	1	1	1	1	0	1	1	1	1	0	1	1	1	1
gal[c] -> udpgal[c]	0	0	1	0	1	0	0	0	0	1	1	0	0	0	1	1
galgluside_hs[g] -> galgalgalthcrm_hs[g]	0	0	0	0	0	0	0	0	0	0	0	0	0	0	0	0
galgluside_hs[g] -> acgagbside_hs[g]	0	0	0	0	0	1	0	0	0	1	1	0	0	0	0	1
galgluside_hs[g] -> acnacngalgbside_hs[g]	0	0	0	0	0	0	0	0	0	1	1	1	0	0	1	1
galgluside_hs[g] -> gd1b2_hs[g]	0	0	0	0	0	0	0	0	0	0	1	0	0	0	0	1
galgluside_hs[g] -> gd1c_hs[g]	0	0	0	0	0	0	0	0	0	1	0	0	0	0	1	1
galgluside_hs[g] -> gp1c_hs[g]	0	0	0	0	0	0	0	0	0	0	1	0	0	0	0	1
galgluside_hs[g] -> gq1balpha_hs[g]	0	0	0	0	0	0	0	0	0	1	1	0	0	0	0	1
gam6p[c] -> uacgam[c]	0	0	1	0	1	0	1	0	0	1	1	1	0	0	1	1
gdpmann[c] -> gdpfuc[c]	1	1	1	1	1	1	1	1	1	1	1	1	1	1	1	1
glc_D[c] -> inost[c]	0	1	1	1	0	1	0	1	1	1	1	0	1	1	1	1
glc_D[c] -> lac_L[c] + atp[c] + h2o[c]	0	0	1	0	1	0	1	0	1	1	1	1	0	1	1	1
glc_D[c] -> lac_D[c]	0	0	1	1	1	0	1	1	1	1	1	1	0	1	1	1
glc_D[c] -> lcts[g]	1	1	1	1	1	1	1	1	1	1	1	1	1	1	1	1
glc_D[c] -> pyr[c]	1	1	1	1	1	1	1	1	1	1	1	1	1	1	1	1
gln_L[c] -> nh4[c]	1	1	1	1	1	1	1	1	1	1	1	1	1	1	1	1
gln_L[m] -> glu_L[m]	1	1	1	1	1	1	1	1	1	1	1	1	1	1	1	1
glu5sa[c] -> pro_L[c]	0	0	0	0	0	0	0	0	0	0	0	0	0	0	0	0
glu_L[c] -> 4abut[c]	1	1	1	1	1	1	1	1	1	1	1	1	1	1	1	1
glu_L[c] -> gln_L[c]	1	0	1	0	1	0	1	0	1	1	1	1	0	1	1	1
glu-L -> pro-L	0	0	0	0	0	0	0	0	0	0	0	0	0	0	0	0
glu_L[m] -> akg[m]	1	1	1	1	1	1	1	1	1	1	1	1	1	1	1	1
gluside_hs[g] -> galgluside_hs[g]	1	1	1	1	0	1	0	1	1	1	1	0	1	1	1	1
glx[m] -> glyclt[m]	0	0	0	0	0	0	0	0	0	0	0	0	0	0	0	0
gly[c] -> ser_L[c] -> pyr[c], 1	0	0	0	0	0	0	1	1	0	1	1	0	0	1	1	1
gly[c] -> ser_L[c] -> pyr[c], 2	1	1	1	1	1	1	1	1	1	1	1	1	1	1	1	1
glyc[c] -> glc_D[c]	1	1	1	1	1	1	1	1	1	1	1	1	1	1	1	1
glyc[c] + Rtotal[c] + Rtotal2[c] -> dag_hs[c]	0	1	1	1	0	1	0	1	1	1	1	0	1	1	1	1
glyc[c] + Rtotal[c] -> tag_hs[c]	0	0	0	0	0	0	0	0	0	0	0	0	0	0	0	0
glyclt[c] -> gly[c]	0	0	0	0	0	0	0	1	1	1	1	0	0	1	0	1
glygn2[c] -> glc_D[c]	1	1	1	1	1	1	1	1	1	1	1	1	1	1	1	1
glygn2[e] -> glc_D[e] - via AMY2e	0	0	0	0	0	0	0	0	0	0	0	0	0	0	0	0
glx[c] -> oxa[c]	1	1	1	1	1	1	0	1	1	1	1	1	1	1	1	1
ha[l] -> acgam[l] + glcur[l]	1	1	1	1	1	1	1	1	1	1	1	1	1	1	1	1
his_L[c] -> glu_L[c]	0	0	0	0	0	0	0	1	0	1	1	0	0	1	0	1
his_L[c] -> hista[c]	1	1	1	1	1	1	1	1	1	1	1	0	1	1	1	1
hista[c] -> 3mlda[c]	0	0	0	0	0	0	0	1	0	0	0	0	0	1	1	0
hista[c] -> im4ac[c]	0	0	0	0	0	0	0	0	0	0	0	0	0	0	0	0
hmgcoa[x] -> chsterol[r]	1	1	1	1	1	1	1	1	1	1	1	1	1	1	1	1
hmgcoa[x] -> frdp[x]	1	1	1	1	1	1	1	1	1	1	1	1	1	1	1	1
hmgcoa[x] -> xoldiolone[r]	0	0	0	0	0	0	0	0	0	0	0	0	0	0	0	1
hmgcoa(x) -> xoltriol[c]	1	1	1	1	1	1	1	1	1	1	1	1	1	1	1	1
hpyr[c] -> 2pg[c]	1	1	1	1	1	1	1	1	1	1	1	1	1	1	1	1
hpyr[c] -> glyclt[c]	1	1	1	1	1	0	0	1	0	1	1	1	1	1	1	1
hpyr[c] -> glyc_S[c]	1	1	1	1	1	1	1	1	1	1	1	1	1	1	1	1
hspg[l] -> gal[l] + glcur[l] + xyl_D[l]	0	0	0	0	0	0	0	0	0	0	0	0	0	0	0	0
hyptaur[c] -> taur[x]	0	1	0	1	0	1	0	1	1	1	1	0	1	1	1	1
ile_L[c] -> accoa[c]	0	0	0	0	1	0	0	0	0	1	0	0	0	0	0	0
inost[c] -> pail_hs[c]	0	0	0	0	0	0	0	0	0	0	0	0	0	0	0	0
inost[c] -> pail45p_hs[c]	0	0	0	0	0	0	0	0	0	0	0	0	0	0	0	0
inost[c] -> pail4p_hs[c]	0	0	0	0	0	0	0	0	0	0	0	0	0	0	0	0
inost[c] -> xu5p_D[c]	0	1	1	0	1	0	1	0	0	1	1	1	0	1	0	1
ipdp[x] -> sql[r]	1	1	1	1	1	1	1	1	1	1	1	1	1	1	1	0
itacon[m] -> pyr[m]	0	0	0	0	0	0	0	0	0	0	0	0	0	0	0	0
ksi[l] -> man[l] + acgam[l]	0	0	0	0	0	0	0	0	0	1	1	0	0	0	1	1
ksii_core2[l] -> Ser_Thr[l]	1	1	1	1	0	0	0	1	1	1	1	0	1	1	1	1
ksii_core4[l] -> Ser/Thr[l]	1	1	1	0	0	0	0	1	1	1	1	0	0	1	1	1
l2fn2m2masn(g) -> ksi(g)	0	0	0	0	0	0	0	0	0	0	1	0	0	0	0	1
lac_L[c] -> glc_D[c]	1	1	1	1	1	1	1	1	1	1	1	1	1	1	1	1
Lcyst[c] -> taur[x]	0	0	0	0	0	0	0	0	1	1	1	0	0	1	1	1
leu_L[c] -> accoa[c]	0	0	0	0	0	0	0	0	0	0	0	0	0	0	0	0
lys_L[c] -> accoa[m] (via saccrp-L pathway)	0	0	0	0	0	0	0	0	0	0	0	0	0	0	0	0
lys_L[x] -> aacoa[m] (via Lpipecol pathway)	0	0	0	0	0	0	0	0	1	0	1	0	0	0	0	0
m8masn[r] -> nm4masn[g]	0	0	0	0	0	0	0	0	0	1	1	0	0	0	1	1
man[c] -> gdpmann[c]	0	0	0	0	0	1	0	1	0	1	1	0	0	1	1	1
man6p[c] -> kdn[c] - via ACNAM9PL2	0	0	1	0	0	0	0	0	0	1	0	0	0	0	0	0
mescon[m] -> pyr[m]	0	0	0	0	0	0	0	0	0	0	0	0	0	0	0	0
met_L[c] -> cys_L[c]	0	0	0	0	0	0	0	1	0	1	1	0	0	1	1	1
mi145p[c] -> inost[c]	1	1	1	1	1	1	1	1	1	1	1	1	1	1	1	1
msa[m] -> ala_B[m]	0	0	0	0	0	0	1	1	0	0	1	1	0	1	1	1
mthgxl[c] -> 12ppd_S[c]	1	1	1	1	1	1	1	1	1	1	1	1	1	1	1	1
mthgxl[c] -> lac_D[c]	1	1	1	1	1	1	1	1	1	1	1	1	1	1	1	1
n2m2nmasn[l] -> man[l] + acgam[l]	0	0	0	0	0	0	0	0	0	0	0	0	0	0	0	0
nm4masn[g] -> l2fn2m2masn[g]	0	0	0	0	0	0	0	0	0	0	0	0	0	0	0	0
nm4masn[g] -> n2m2nmasn[g]	0	0	0	0	0	0	0	0	0	0	0	0	0	0	0	0
nm4masn[g] -> s2l2fn2m2masn[g]	0	0	0	0	0	0	0	0	0	0	0	0	0	0	0	0
o2- -> h2o2 -> o2 + h2o, 1	1	1	1	1	1	1	1	1	1	1	1	1	1	1	1	1
o2- -> h2o2 -> o2 + h2o, 2	1	1	1	1	1	1	1	1	1	1	1	1	1	1	1	1
orn[c] -> nh4[c]	1	1	1	1	1	1	1	1	1	1	1	1	1	1	1	1
orn[c] -> ptrc[c]	1	1	1	1	1	1	1	1	1	1	1	1	1	1	1	1
orn[c] -> spmd[c]	1	1	0	1	1	1	1	1	1	1	1	0	1	1	1	1
orn[c] -> sprm[c]	1	0	0	0	1	0	1	0	1	1	1	0	0	1	1	1
pail_hs[c] -> gpi_prot_hs[r]	0	0	1	0	0	0	0	0	0	0	0	0	0	0	0	0
pail45p[c] -> mi145p[c]	0	1	1	1	0	1	1	1	1	1	1	1	1	1	1	1
phe_L[c] -> pac[c]	1	1	1	1	1	1	1	1	1	1	1	1	1	1	1	1
phe_L[c] -> pacald[c]	1	1	1	1	1	1	1	1	1	1	1	1	1	1	1	1
phe_L[c] -> peamn[c]	1	1	1	1	1	1	1	1	1	1	1	1	1	1	1	1
phe_L[c] -> phaccoa[c]	0	0	0	0	0	0	0	0	0	0	0	0	0	0	0	0
phe_L[c] -> pheacgln[c]	0	0	0	0	0	0	0	0	0	1	1	1	0	1	0	1
phe_L[c] -> phpyr[c]	0	0	0	0	0	0	0	0	0	0	0	0	0	0	0	0
phe_L[c] -> tyr_L[c]	0	0	0	0	0	0	0	0	0	0	1	0	0	0	0	1
pheme[c] -> bilirub[c]	1	1	0	1	0	1	1	1	1	1	1	1	1	1	1	1
phytcoa[x] -> dmnoncoa[m]	1	0	1	0	1	1	1	1	1	1	1	1	0	0	0	0
pmtcoa[c] -> crmp_hs[c]	0	0	0	0	0	0	0	1	0	0	1	0	0	0	0	1
pmtcoa[c] -> sphmyln_hs[c]	1	0	0	0	0	0	0	1	1	1	1	0	0	0	1	1
ppcoa[m] -> succoa[m]	1	1	1	1	1	1	1	1	1	1	1	1	1	1	1	1
pro_L[c] -> glu_L[c]	0	0	1	0	1	0	1	1	0	1	1	1	0	1	0	1
ptrc[c] -> ala_B[c]	0	1	0	1	0	1	1	1	0	1	1	0	1	1	1	1
ptrc[c] -> spmd[c]	0	1	0	1	1	1	1	1	0	1	1	0	1	1	1	1
pyr[c] -> fad[m] + h[m]	0	0	0	0	0	0	0	0	0	0	0	0	0	0	0	0
pyr[c] -> lac_D[c]	0	0	1	1	1	0	1	1	1	1	1	1	0	1	1	1
pyr -> nad[m] + h[m]	0	0	0	0	0	0	0	0	0	0	0	0	0	0	0	0
pyr[c] -> accoa[m] + co2[c] + nadh[m]	0	0	0	0	0	0	0	0	0	0	0	0	0	0	0	0
pyr[c] -> ala_L[c], 1	0	0	1	0	1	0	1	1	1	1	1	1	0	1	1	1
pyr[c] -> ala_L[c], 2	1	1	1	1	1	1	1	1	1	1	1	1	1	1	1	1
s2l2fn2m2masn[l] -> man[l] + acgam[l]	0	0	0	0	0	0	0	0	0	1	1	0	0	0	1	1
Ser/Thr[g] + udpacgal[g] -> core2[g] - via GALNTg and DM_core4[g]	0	0	0	0	0	0	0	0	0	0	0	0	0	0	0	0
Ser/Thr[g] + udpacgal[g] -> core4[g] - via GALNTg and DM_core4[g]	0	0	0	0	0	0	0	0	0	0	0	0	0	0	0	0
Ser/Thr[g] + udpacgal[g] -> Tn_antigen[g] - via GALNTg	0	0	0	0	0	0	0	0	0	0	0	0	0	0	0	0
Ser_Thr[g] + udpacgal[g] -> sTn_antigen[g] - via GALNTg and DM_sTn_antigen[g]	0	0	0	0	0	0	0	0	0	0	0	0	0	0	0	0
Ser-Gly/Ala-X-Gly[r] -> cs_pre[g]	0	0	0	0	0	0	0	0	0	0	0	0	0	0	0	0
Ser_Gly_Ala_X_Gly[r] -> cspg_a[g]	0	0	0	0	0	0	0	0	0	0	0	0	0	0	0	0
Ser-Gly/Ala-X-Gly[r] -> cspg_c[g]	0	0	0	0	0	0	0	0	0	0	0	0	0	0	0	0
Ser_Gly_Ala_X_Gly[r] -> cspg_d[g]	0	0	0	0	0	0	0	0	0	0	0	0	0	0	0	0
Ser_Gly_Ala_X_Gly[r] -> cspg_e[g]	0	0	0	0	0	0	0	0	0	0	0	0	0	0	0	0
Ser_Gly_Ala_X_Gly[r] -> hspg[g]	0	0	0	0	0	0	0	0	0	0	0	0	0	0	0	0
Ser_Gly_Ala_X_Gly[r] -> cspg_b[g]	0	0	0	0	0	0	0	0	0	0	0	0	0	0	0	0
ser_L[c] -> cys_L[c]	0	0	0	0	0	0	0	0	0	0	0	0	0	0	0	0
so4[c] -> paps[c]	0	0	0	0	0	0	0	0	0	1	0	0	0	1	1	1
spmd[c] -> sprm[c]	0	0	0	0	0	0	0	0	0	0	1	0	0	1	0	1
srtn[c] -> f5hoxkyn[c]	0	0	0	0	0	0	0	0	0	0	0	0	0	0	0	0
srtn[c] -> fna5moxam[c]	0	0	0	0	0	0	0	0	0	0	0	0	0	0	0	0
srtn[c] -> nmthsrtn[c]	0	0	0	0	0	0	0	0	0	0	1	0	0	0	0	1
strch1[e] -> glc_D[e] via AMY1e	1	0	1	1	1	0	1	1	1	1	1	1	1	1	1	1
succoa[m] -> oaa[m]	1	1	1	1	1	1	1	1	1	1	1	1	1	1	1	1
taur[x] -> tchola[x]	0	1	0	0	0	0	0	1	0	1	0	0	0	0	0	0
thcholstoic[x] -> gchola[x]	0	0	1	0	0	0	0	0	1	0	1	0	0	1	1	0
thcholstoic[x] -> tchola[x]	0	0	0	0	0	0	0	0	0	0	0	0	0	0	0	1
trp_L[c] -> ppcoa[c]	0	0	0	0	0	0	0	0	0	0	1	0	0	0	0	0
trp_L[c] -> accoa[c]	0	0	0	0	0	0	0	0	0	0	1	0	0	0	0	1
trp_L[c] -> anth[c]	0	0	0	0	0	0	0	0	0	0	1	0	0	0	0	0
trp_L[c] -> id3acald[c]	0	0	0	0	0	0	0	0	0	0	0	0	0	0	0	0
trp_L[c] -> kynate[c]	0	1	0	0	0	0	0	0	0	0	1	0	0	0	0	1
trp_L[c] -> melatn[c]	0	0	0	0	0	0	0	0	0	0	0	0	0	0	0	0
trp_L[c] -> Lfmkynr[c]	1	1	1	0	1	0	1	0	1	1	1	0	0	1	1	1
trp_L[c] -> Lkynr[c]	1	1	1	0	1	0	1	0	1	1	1	0	0	1	1	1
trp_L[c] -> nformanth[c]	0	0	0	0	0	0	0	0	0	0	1	0	0	0	0	0
srtn[c] -> 5moxact[c]	0	0	0	0	0	0	0	0	0	0	0	0	0	0	0	0
srtn[c] -> 6hoxmelatn[c]	0	0	0	0	0	0	0	0	0	0	0	0	0	0	0	0
trp_L[c] -> quln[c]	0	1	1	0	1	0	1	0	0	0	1	0	0	0	0	1
trp_L[c] -> srtn[c]	0	0	0	1	0	1	0	1	1	1	1	0	1	1	1	1
Tyr_ggn[c] -> glygn2[c]	0	0	0	0	0	0	0	0	0	0	0	0	0	0	0	0
tyr_L[c] -> 34hpp[c]	0	1	1	1	1	1	1	1	1	1	1	1	1	1	1	1
tyr_L[c] -> 4hphac[c]	1	1	1	1	1	1	1	1	1	1	1	1	1	1	1	1
tyr_L[c] -> adrnl[c]	0	0	0	0	0	0	0	0	0	0	1	0	0	0	0	1
tyr_L[c] -> dopa[c]	0	0	0	1	0	0	0	0	0	0	1	0	0	0	0	1
tyr_L[c] -> fum[c] + acac[c]	0	1	1	1	1	1	1	1	1	1	1	1	1	1	1	1
tyr_L[c] -> melanin[c]	0	0	0	0	0	0	0	0	0	0	1	0	0	0	0	1
tyr_L[c] -> nrpphr[c]	0	0	0	0	0	0	0	0	0	0	1	0	0	0	0	1
uacgamv[c] + udpglcur[c] -> ha[e] - via HAS2	0	0	0	0	0	0	0	0	0	0	0	0	0	0	1	0
uacgam[c] -> m8masn[r]	0	0	1	0	0	1	0	1	1	1	1	1	0	1	1	1
udpglcur[c] -> xu5p_D[c]	0	0	1	0	1	0	0	0	0	1	1	1	0	0	1	1
ura[c] -> ala_B[c]	1	1	1	1	1	1	1	1	1	1	1	1	1	1	1	1
val_L[c] -> 3aib[c]	0	1	0	1	0	1	0	1	0	0	1	0	1	1	1	1
val_L[c] -> succoa[m]	0	0	0	0	0	0	0	0	0	1	0	0	0	0	0	1
xoltriol[m] -> thcholstoic[m]	1	1	1	1	1	1	1	1	1	1	1	1	1	1	1	1
xylu_D[c] -> glyclt[c]	1	1	1	1	1	1	1	1	1	1	1	1	1	1	1	1
glucose to lactate conversion	0	1	0	0	0	0	1	1	0	1	0	0	0	1	0	0
glutamine to glucose conversion - ASPTAm	0	1	1	1	1	1	1	1	1	1	1	1	1	1	1	1
glutamine to glucose conversion - FUM	1	1	1	1	1	1	1	1	1	1	1	1	1	1	1	1
glutamine to glucose conversion - MDH	0	0	1	1	1	1	1	1	1	0	1	1	1	1	0	1
glutamine to glucose conversion - G6PPer	0	1	0	1	0	1	0	1	0	0	1	0	1	0	1	1
glutamine to proline conversion - P5CRm	1	0	1	0	0	0	0	0	1	1	0	1	0	0	0	1
glutamine to proline conversion - P5CRxm	1	1	1	1	0	0	0	1	1	1	0	0	1	0	0	0
glutamine to ornithine conversion - ORNTArm	0	1	0	0	0	0	0	1	0	1	0	0	0	1	0	0
glutamine to citrulline converion - OCBTm	0	0	0	0	0	0	0	1	0	1	1	0	0	1	1	1
glutamine to lactate - LDH_L	0	0	1	0	1	0	0	1	0	0	1	1	0	1	0	1
glutamine to aspartate - ASPTA	0	0	1	1	1	1	1	1	1	0	1	1	1	1	0	1
glutamine to co2 - AKGDm	0	1	0	0	1	1	0	1	0	1	0	0	0	1	0	0
glutamine to ammonia - GLUNm	1	0	1	0	1	0	1	0	1	1	1	1	0	1	1	1
putriscine to methionine (depends on oxygen uptake) - UNK2	0	0	0	0	0	0	0	0	0	1	0	0	0	0	0	0
basolateral secretion of alanine	0	0	0	0	0	0	0	0	0	0	0	0	0	0	0	0
basolateral secretion of lactate	0	1	0	1	0	0	0	1	1	1	1	0	0	1	1	0
synthesis of arginine from glutamine - ARGSL	0	1	0	0	0	0	0	1	1	1	1	0	0	1	1	1
synthesis of proline from glutamine - P5CR	1	1	1	1	1	1	1	1	1	1	1	0	1	1	1	1
synthesis of proline from glutamine - P5CRm	1	0	1	0	0	0	0	0	1	1	0	1	0	0	0	1
synthesis of proline from glutamine - P5CRxm	1	1	1	1	0	0	0	1	1	1	0	0	1	0	0	0
synthesis of alanine from glutamine - ALATA_L	1	1	1	1	1	1	1	1	0	1	1	1	1	0	1	1
basolateral secretion of proline	0	0	0	0	0	0	0	0	0	0	0	0	0	0	0	0
basolateral secretion of arginine	0	1	0	0	0	0	0	1	0	1	0	0	0	1	0	0
basolateral secretion of ornithine	0	0	0	0	0	0	0	0	0	0	0	0	0	0	0	0
synthesis of spermine from ornithine - SPRMS	0	0	0	0	0	0	0	0	0	1	0	0	0	1	1	0
synthesis of spermidine from ornithine - SPMS	0	0	0	0	0	0	0	1	0	1	1	0	0	1	1	0
synthesis of nitric oxide from arginine - NOS2	1	1	1	1	1	1	1	1	0	0	1	1	1	1	0	1
synthesis of cholesterol - DSREDUCr	0	1	0	0	1	0	0	1	0	1	0	0	0	1	0	0
de novo purine synthesis - ADSL1	1	0	1	0	1	0	1	1	1	1	1	1	0	1	1	1
de novo purine synthesis - GMPS2	1	0	1	0	1	0	1	0	1	1	1	1	0	1	1	1
salvage of purine bases - ADPT	1	0	0	0	0	0	0	1	1	1	1	0	0	1	1	1
salvage of purine bases - GUAPRT	1	0	1	0	1	0	1	0	1	1	1	0	0	1	0	1
salvage of purine bases - HXPRT	1	0	1	0	1	0	1	0	1	1	1	0	0	1	1	1
purine catabolism - XAOx	0	1	1	0	1	0	1	0	0	0	1	1	1	0	0	1
pyrimidine synthesis (with hco3 uptake) - TMDS	0	0	0	0	0	0	0	0	0	1	1	0	0	0	0	1
pyrimidine synthesis (with hco3 uptake) - CTPS2	0	0	0	0	1	0	1	0	0	1	1	0	0	1	1	1
pyrimidine catabolism - UPPN	0	0	1	0	1	0	1	0	0	1	1	0	0	0	1	1
pyrimidine catabolism - BUP2	0	0	0	0	0	0	0	0	0	0	0	0	0	0	0	0
fructose to glucose conversion - TRIOK	1	0	1	1	1	1	1	1	0	0	0	1	1	0	0	0
uptake and secretion of cholic acid - CHOLATEt3	0	1	1	0	1	0	1	1	0	1	1	1	0	0	0	1
uptake and secretion of cholic glycocholate - GCHOLAt3	0	1	1	1	1	1	1	1	0	1	1	1	1	0	0	1
uptake and secretion of tauro-cholate - TCHOLAt3	0	1	1	1	1	1	1	1	0	0	1	1	1	0	1	1
Synthesis of fructose-6-phosphate from erythrose-4-phosphate (HMP shunt) - TKT2	0	1	0	0	0	0	1	0	0	1	0	0	0	1	0	0
Malate to pyruvate (malic enzyme) - ME2	0	1	1	1	1	1	1	1	1	0	1	1	1	1	0	1
Malate to pyruvate (malic enzyme) - ME2m	0	1	0	1	0	1	0	1	1	1	1	0	1	1	1	1
Synthesis of urea (urea cycle) - ARGN	0	0	0	0	0	0	0	1	0	0	1	0	0	1	1	1
Cysteine to pyruvate - 3SPYRSP	0	0	0	0	0	0	0	0	0	0	0	0	0	0	0	0
Methionine to cysteine - CYSTGL	0	0	0	0	0	0	0	0	0	0	0	0	0	0	0	0
Synthesis of triacylglycerol (TAG reformation) - DGAT	1	1	1	1	1	1	1	1	1	1	1	1	1	1	1	1
Phosphatidylcholine synthesis - PETOHMm_hs	0	0	0	0	0	0	0	1	0	1	0	0	0	1	0	0
Synthesis of FMN from riboflavin - RBFK	1	0	1	0	1	0	1	0	1	1	0	1	0	1	1	0
synthesis of FAD from riboflavin - FMNAT	0	1	1	1	1	1	1	1	1	1	1	1	1	1	1	1
Synthesis of 5-methyl-tetrahydrofolate from folic acid - MTHFR3	1	0	0	0	0	0	1	0	1	1	1	1	0	1	1	1
Putriscine to GABA - ABUTD	0	0	0	0	0	0	0	1	1	1	0	0	0	1	1	0
Superoxide dismutase - SPODMm	0	0	0	0	0	0	0	0	0	0	0	0	0	0	0	0
Availability of bicarbonate from Carbonic anhydrase reaction - H2CO3Dm	1	1	1	1	1	1	1	1	1	1	1	1	1	1	1	1
Regeneration of citrate (TCA cycle) - CSm	1	1	1	1	1	1	1	1	1	1	1	1	1	1	1	1
Imidazolone to N-Formimidoyl-L-glutamate (IZPN)	0	0	0	0	0	0	0	0	0	0	0	0	0	0	0	0
binding of guar gum fiber to bile acids - EX_GUMGCHOL(e)	0	0	0	0	0	0	0	0	0	0	0	0	0	0	0	0
binding of guar gum fiber to bile acids - GUMTCHOLe	0	0	0	0	0	0	0	0	0	0	0	0	0	0	0	0
binding of psyllium fiber to bile acids - PSYGCHe	0	0	0	0	0	0	0	0	0	0	0	0	0	0	0	0
binding of psyllium fiber to bile acids - PSYTCHe	0	0	0	0	0	0	0	0	0	0	0	0	0	0	0	0
binding of psyllium fiber to bile acids - PSYTDECHe	0	0	0	0	0	0	0	0	0	0	0	0	0	0	0	0
binding to beta glucan fibers to bile acids - BGLUGCHe	0	0	0	0	0	0	0	0	0	0	0	0	0	0	0	0
binding to beta glucan fibers to bile acids - BGLUTCHLe	0	0	0	0	0	0	0	0	0	0	0	0	0	0	0	0
binding to beta glucan fibers to bile acids - BGLUTDECHOe	0	0	0	0	0	0	0	0	0	0	0	0	0	0	0	0
binding of pectin fiber to bile acids - PECGCHLe	0	0	0	0	0	0	0	0	0	0	0	0	0	0	0	0
binding of pectin fiber to bile acids - PECTCHLe	0	0	0	0	0	0	0	0	0	0	0	0	0	0	0	0
binding of pectin fiber to bile acids - PECDCHe	0	0	0	0	0	0	0	0	0	0	0	0	0	0	0	0
heme synthesis - FCLTm	0	0	0	0	0	0	0	0	0	0	0	0	0	0	0	0
heme degradation - HOXG	0	0	0	0	0	0	0	1	0	1	0	0	0	1	0	0
secretion of lactate	1	1	1	1	1	1	1	1	1	1	1	1	1	1	1	1
secretion of hyaluronic acid	0	0	0	1	0	0	0	0	0	0	1	0	0	0	1	1
secretion of fructuose	1	1	1	1	1	1	1	1	1	1	1	1	1	1	1	1
secretion of sorbitol	1	1	1	1	1	1	1	1	1	1	1	1	1	1	1	1
secretion of estradiol	0	0	0	1	0	1	0	1	1	1	1	0	1	1	1	1
secretion of androgen	0	0	0	0	0	1	0	1	0	0	0	0	1	0	0	0
secretion of testosterone	0	0	0	1	0	1	0	1	1	1	1	0	1	1	1	1
secretion of pyruvate	1	1	1	1	1	1	1	1	1	1	1	1	1	1	1	1
secretion of progesterone	0	0	0	1	0	1	1	1	1	1	1	1	1	1	1	1
Total number of functions that carry flow	131	153	171	145	165	137	162	186	176	220	235	152	143	201	194	235
