# Supplementary material for: Dynamic genome-scale cell-specific metabolic models reveal novel inter-cellular and intra-cellular metabolic communications during ovarian follicle development
Source: BMC Bioinformatics. 2019 Jun 10;20:307. doi: 10.1186/s12859-019-2825-2 (PMC6558917; doi:10.1186/s12859-019-2825-2)
Supplement: Supplementary file 4 — Entrez ID, gene symbol, the community that the gene belongs to according to Infomap and the flow of information that is transferred through the enzymatic node. (XLSX 110 kb) [file 12859_2019_2825_MOESM6_ESM.xlsx]

## Sheet: FileS6. Correlationbetweennodes
EntrezID	Community	Flow	Ensembl GeneID	Gene Symbol
74847	1	0.000713222	ENSMUSG00000020332	4930404A10Rik
66763	1	0.000616629	ENSMUSG00000021718	4933425L06Rik
78894	1	0.0011796	ENSMUSG00000029482	Aacs
23923	1	6.53705e-05	ENSMUSG00000057228	Aadat
11298	1	0.000723954	ENSMUSG00000020804	Aanat
30956	1	0.000361977	ENSMUSG00000029695	Aass
268860	1	4.68326e-05	ENSMUSG00000057880	Abat
11303	1	0.00188794	ENSMUSG00000015243	Abca1
27413	1	0.00167719	ENSMUSG00000027048	Abcb11
18670	1	0.00166451	ENSMUSG00000042476	Abcb4
17250	1	0.00166158	ENSMUSG00000023088	Abcc1
76408	1	0.00167719	ENSMUSG00000020865	Abcc3
27416	1	0.00170256	ENSMUSG00000022822	Abcc5
11666	1	0.0020099	ENSMUSG00000031378	Abcd1
26874	1	0.00167719	ENSMUSG00000055782	Abcd2
19299	1	0.00166158	ENSMUSG00000028127	Abcd3
27409	1	0.0016567	ENSMUSG00000040505	Abcg5
67470	1	0.0016567	ENSMUSG00000024254	Abcg8
99382	1	0.000505402	ENSMUSG00000032724	Abtb2
52538	1	0.002046	ENSMUSG00000036880	Acaa2
11363	1	0.00055321	ENSMUSG00000026003	Acadl
11364	1	0.000749322	ENSMUSG00000062908	Acadm
11409	1	0.000683951	ENSMUSG00000029545	Acads
11370	1	0.00116106	ENSMUSG00000018574	Acadvl
224530	1	7.41516e-05	ENSMUSG00000062480	Acat3
11428	1	0.000789325	ENSMUSG00000028405	Aco1
11429	1	0.000792252	ENSMUSG00000022477	Aco2
26897	1	0.00118643	ENSMUSG00000072949	Acot1
74156	1	0.00111618	ENSMUSG00000021620	Acot12
171210	1	0.0014401	ENSMUSG00000021226	Acot2
217700	1	0.00118643	ENSMUSG00000043487	Acot6
70025	1	0.00146937	ENSMUSG00000028937	Acot7
11431	1	0.00054638	ENSMUSG00000044573	Acp1
11433	1	0.00145181	ENSMUSG00000001348	Acp5
66659	1	0.00145181	ENSMUSG00000028093	Acp6
56318	1	0.00145181	ENSMUSG00000032561	Acpp
14081	1	0.000658583	ENSMUSG00000018796	Acsl1
74205	1	0.000539551	ENSMUSG00000032883	Acsl3
50790	1	0.00047418	ENSMUSG00000031278	Acsl4
68738	1	0.00060297	ENSMUSG00000027452	Acss1
60525	1	0.00131131	ENSMUSG00000027605	Acss2
380660	1	0.0012157	ENSMUSG00000035948	Acss3
71670	1	0.000416615	ENSMUSG00000024866	Acy3
66204	1	0.00121472	ENSMUSG00000008822	Acyp1
75572	1	0.00121472	ENSMUSG00000060923	Acyp2
11486	1	0.00128107	ENSMUSG00000017697	Ada
432530	1	0.000347342	ENSMUSG00000020431	Adcy1
104110	1	0.000799081	ENSMUSG00000022220	Adcy4
11512	1	0.000347342	ENSMUSG00000022994	Adcy6
11513	1	0.000347342	ENSMUSG00000031659	Adcy7
11514	1	0.000347342	ENSMUSG00000022376	Adcy8
11515	1	0.000347342	ENSMUSG00000005580	Adcy9
11522	1	0.000873233	ENSMUSG00000074207	Adh1
26876	1	0.000873233	ENSMUSG00000037797	Adh4
11532	1	0.000832254	ENSMUSG00000028138	Adh5
11529	1	0.00141766	ENSMUSG00000055301	Adh7
76187	1	0.000873233	ENSMUSG00000025911	Adhfe1
11534	1	0.00118252	ENSMUSG00000039197	Adk
11564	1	7.02489e-05	ENSMUSG00000022407	Adsl
11566	1	0.000895674	ENSMUSG00000015961	Adss
11565	1	0.000895674	ENSMUSG00000011148	Adssl1
71562	1	0.00127814	ENSMUSG00000017718	Afmid
77559	1	0.000416615	ENSMUSG00000033400	Agl
55979	1	8.78111e-05	ENSMUSG00000034254	Agpat1
67512	1	8.78111e-05	ENSMUSG00000026922	Agpat2
28169	1	8.78111e-05	ENSMUSG00000001211	Agpat3
68262	1	8.78111e-05	ENSMUSG00000023827	Agpat4
52123	1	8.78111e-05	ENSMUSG00000031467	Agpat5
11628	1	0.0011191	ENSMUSG00000040627	Aicda
11636	1	0.000519061	ENSMUSG00000026817	Ak1
11637	1	0.00121179	ENSMUSG00000028792	Ak2
56248	1	6.24435e-05	ENSMUSG00000024782	Ak3
11639	1	0.00121179	ENSMUSG00000028527	Ak4
78801	1	0.000519061	ENSMUSG00000041323	Ak7
68870	1	0.000482961	ENSMUSG00000026807	Ak8
11648	1	0.000521988	ENSMUSG00000036500	Akp3
58810	1	0.0010752	ENSMUSG00000028692	Akr1a1
11677	1	0.00144596	ENSMUSG00000001642	Akr1b3
77337	1	0.000885917	ENSMUSG00000021207	Akr1c21
17025	1	0.00102837	ENSMUSG00000028393	Alad
11655	1	0.000270263	ENSMUSG00000032786	Alas1
11656	1	0.000270263	ENSMUSG00000025270	Alas2
56454	1	0.000384418	ENSMUSG00000025007	Aldh18a1
11668	1	0.00136302	ENSMUSG00000053279	Aldh1a1
19378	1	0.00159524	ENSMUSG00000013584	Aldh1a2
56847	1	0.00215332	ENSMUSG00000015134	Aldh1a3
72535	1	0.00222894	ENSMUSG00000035561	Aldh1b1
11669	1	0.00222894	ENSMUSG00000029455	Aldh2
11670	1	0.00221382	ENSMUSG00000019102	Aldh3a1
11671	1	0.00209527	ENSMUSG00000010025	Aldh3a2
67689	1	0.00215332	ENSMUSG00000024885	Aldh3b1
56752	1	0.00211869	ENSMUSG00000026687	Aldh9a1
56737	1	0.000682975	ENSMUSG00000039740	Alg2
66248	1	5.1711e-05	ENSMUSG00000036632	Alg5
11684	1	0.000109276	ENSMUSG00000000320	Alox12
11689	1	0.000113179	ENSMUSG00000025701	Alox5
11702	1	0.000709319	ENSMUSG00000075232	Amd1
11717	1	0.0011474	ENSMUSG00000005686	Ampd3
16790	1	0.000520037	ENSMUSG00000039062	Anpep
76507	1	0.000839084	ENSMUSG00000029811	Aoc1
237940	1	0.000593213	ENSMUSG00000078651	Aoc2
11754	1	0.000594189	ENSMUSG00000019326	Aoc3
11761	1	0.00117277	ENSMUSG00000063558	Aox1
71724	1	0.00117082	ENSMUSG00000064294	Aox3
71872	1	0.00117082	ENSMUSG00000038242	Aox4
11821	1	0.000142449	ENSMUSG00000006589	Aprt
11833	1	0.000459545	ENSMUSG00000030762	Aqp8
11846	1	0.000412712	ENSMUSG00000019987	Arg1
11847	1	9.07382e-05	ENSMUSG00000021125	Arg2
117590	1	0.000992266	ENSMUSG00000038204	Asb10
27053	1	0.0015123	ENSMUSG00000029752	Asns
11484	1	0.000416615	ENSMUSG00000020774	Aspa
66514	1	9.65922e-05	ENSMUSG00000024654	Asrgl1
11898	1	0.00106154	ENSMUSG00000076441	Ass1
11982	1	0.00167329	ENSMUSG00000025324	Atp10a
11928	1	0.00189087	ENSMUSG00000033161	Atp1a1
98660	1	0.00189087	ENSMUSG00000007097	Atp1a2
27222	1	0.00189087	ENSMUSG00000007107	Atp1a4
11931	1	0.00189087	ENSMUSG00000026576	Atp1b1
11932	1	0.00189087	ENSMUSG00000041329	Atp1b2
11933	1	0.00189087	ENSMUSG00000032412	Atp1b3
67821	1	0.00189087	ENSMUSG00000016327	Atp1b4
67972	1	0.00111423	ENSMUSG00000019943	Atp2b1
11941	1	0.00111423	ENSMUSG00000030302	Atp2b2
381290	1	0.00111423	ENSMUSG00000026463	Atp2b4
11944	1	0.00114545	ENSMUSG00000005553	Atp4a
11945	1	0.00114545	ENSMUSG00000031449	Atp4b
11946	1	0.00102739	ENSMUSG00000025428	Atp5a1
11947	1	0.00102739	ENSMUSG00000025393	Atp5b
11949	1	0.00102739	ENSMUSG00000025781	Atp5c1
66043	1	0.00102739	ENSMUSG00000003072	Atp5d
67126	1	0.00102739	ENSMUSG00000016252	Atp5e
11950	1	0.00102739	ENSMUSG00000000563	Atp5f1
11951	1	0.00102739	ENSMUSG00000006057	Atp5g1
67942	1	0.00102739	ENSMUSG00000062683	Atp5g2
71679	1	0.00102739	ENSMUSG00000034566	Atp5h
11957	1	0.00102739	ENSMUSG00000022890	Atp5j
57423	1	0.00102739	ENSMUSG00000038690	Atp5j2
11958	1	0.00102739	ENSMUSG00000050856	Atp5k
27425	1	0.00102739	ENSMUSG00000038717	Atp5l
11975	1	0.0016811	ENSMUSG00000019302	Atp6v0a1
21871	1	0.0016811	ENSMUSG00000038023	Atp6v0a2
11984	1	0.0016811	ENSMUSG00000024121	Atp6v0c
11972	1	0.0016811	ENSMUSG00000013160	Atp6v0d1
11974	1	0.0016811	ENSMUSG00000015575	Atp6v0e
11964	1	0.0016811	ENSMUSG00000052459	Atp6v1a
11966	1	0.0016811	ENSMUSG00000006273	Atp6v1b2
66335	1	0.0016811	ENSMUSG00000022295	Atp6v1c1
68775	1	0.0016811	ENSMUSG00000020566	Atp6v1c2
73834	1	0.0016811	ENSMUSG00000021114	Atp6v1d
11973	1	0.0016811	ENSMUSG00000019210	Atp6v1e1
74915	1	0.0016811	ENSMUSG00000053375	Atp6v1e2
66144	1	0.0016811	ENSMUSG00000004285	Atp6v1f
66290	1	0.0016811	ENSMUSG00000039105	Atp6v1g1
66237	1	0.0016811	ENSMUSG00000024403	Atp6v1g2
11980	1	0.00166353	ENSMUSG00000037685	Atp8a1
11992	1	0.000119033	ENSMUSG00000021460	Auh
12012	1	0.00119423	ENSMUSG00000039653	Baat
170770	1	0.00167817	ENSMUSG00000002083	Bbc3
12036	1	4.97596e-05	ENSMUSG00000030826	Bcat2
12039	1	0.000287825	ENSMUSG00000060376	Bckdha
12040	1	0.000293679	ENSMUSG00000032263	Bckdhb
63857	1	0.000113179	ENSMUSG00000031845	Bcmo1
71911	1	0.000364904	ENSMUSG00000046598	Bdh1
12183	1	0.00122253	ENSMUSG00000038871	Bpgm
23827	1	0.000621508	ENSMUSG00000026617	Bpnt1
12182	1	0.00110349	ENSMUSG00000029082	Bst1
26363	1	0.000561991	ENSMUSG00000021900	Btd
69719	1	0.00184891	ENSMUSG00000013629	Cad
12346	1	0.00043125	ENSMUSG00000027556	Car1
76459	1	0.00043125	ENSMUSG00000032373	Car12
71934	1	0.00043125	ENSMUSG00000027555	Car13
23831	1	0.00043125	ENSMUSG00000038526	Car14
12349	1	0.00043125	ENSMUSG00000027562	Car2
12350	1	0.00043125	ENSMUSG00000027559	Car3
12351	1	0.00043125	ENSMUSG00000000805	Car4
12352	1	0.000116106	ENSMUSG00000025317	Car5a
56078	1	0.000116106	ENSMUSG00000031373	Car5b
12354	1	0.00043125	ENSMUSG00000031883	Car7
170720	1	0.000252701	ENSMUSG00000013483	Card14
192160	1	0.000686878	ENSMUSG00000078676	Casc3
12408	1	0.000892747	ENSMUSG00000051483	Cbr1
12411	1	0.000409785	ENSMUSG00000024039	Cbs
70266	1	0.000441983	ENSMUSG00000039648	Ccbl1
12491	1	3.41488e-05	ENSMUSG00000002944	Cd36
72269	1	0.00110642	ENSMUSG00000028755	Cda
52858	1	0.000713222	ENSMUSG00000030682	Cdipt
12583	1	0.000780543	ENSMUSG00000033022	Cdo1
74596	1	0.000755176	ENSMUSG00000029330	Cds1
99712	1	0.000709319	ENSMUSG00000040774	Cept1
12647	1	7.70787e-05	ENSMUSG00000021919	Chat
269610	1	0.00174647	ENSMUSG00000005045	Chd5
12660	1	0.00112593	ENSMUSG00000024843	Chka
12651	1	0.00113276	ENSMUSG00000022617	Chkb
12709	1	0.000461496	ENSMUSG00000001270	Ckb
12715	1	0.000461496	ENSMUSG00000030399	Ckm
76722	1	8.68355e-05	ENSMUSG00000021622	Ckmt2
69634	1	3.12217e-05	ENSMUSG00000025545	Clybl
12764	1	9.75679e-05	ENSMUSG00000030282	Cmas
66588	1	0.000716149	ENSMUSG00000028719	Cmpk1
22169	1	0.000504426	ENSMUSG00000020638	Cmpk2
66054	1	0.000497596	ENSMUSG00000024644	Cndp2
71743	1	0.00166548	ENSMUSG00000001755	Coasy
12846	1	0.000695659	ENSMUSG00000000326	Comt
12846	1	0.000695659	ENSMUSG00000098892	COMT
69156	1	0.000690781	ENSMUSG00000021773	Comtd1
12892	1	0.00117764	ENSMUSG00000022742	Cpox
12894	1	0.00148108	ENSMUSG00000024900	Cpt1a
12895	1	0.00148108	ENSMUSG00000078937	Cpt1b
78070	1	0.00148108	ENSMUSG00000007783	Cpt1c
12896	1	0.00128107	ENSMUSG00000028607	Cpt2
66586	1	0.000665413	ENSMUSG00000027357	Crls1
12974	1	0.000327828	ENSMUSG00000005683	Cs
51797	1	0.00136888	ENSMUSG00000028633	Ctps
55936	1	0.00176891	ENSMUSG00000031360	Ctps2
66445	1	0.000966898	ENSMUSG00000022551	Cyc1
13070	1	0.000332707	ENSMUSG00000032323	Cyp11a1
13072	1	0.000332707	ENSMUSG00000022589	Cyp11b2
13085	1	0.00142547	ENSMUSG00000060407	Cyp2a12
13087	1	0.00142547	ENSMUSG00000005547	Cyp2a5
13089	1	0.00142547	ENSMUSG00000040583	Cyp2b13
13090	1	0.00142547	ENSMUSG00000066704	Cyp2b19
13094	1	0.00142547	ENSMUSG00000040660	Cyp2b9
13095	1	0.00142547	ENSMUSG00000003053	Cyp2c29
13096	1	0.00142547	ENSMUSG00000042248	Cyp2c37
13097	1	0.00136498	ENSMUSG00000032808	Cyp2c38
13098	1	0.00142547	ENSMUSG00000025003	Cyp2c39
13099	1	0.00142547	ENSMUSG00000025004	Cyp2c40
72303	1	0.00142547	ENSMUSG00000067231	Cyp2c65
69888	1	0.00136498	ENSMUSG00000067229	Cyp2c66
13101	1	0.00142547	ENSMUSG00000094806	Cyp2d10
56448	1	0.00136595	ENSMUSG00000061740	Cyp2d22
76279	1	0.00142547	ENSMUSG00000022445	Cyp2d26
71754	1	0.00142547	ENSMUSG00000068083	Cyp2d40
13105	1	0.00136595	ENSMUSG00000068086	Cyp2d9
13106	1	0.00140108	ENSMUSG00000025479	Cyp2e1
13107	1	0.00136302	ENSMUSG00000052974	Cyp2f2
13109	1	0.00142547	ENSMUSG00000052520	Cyp2j5
74519	1	0.00142547	ENSMUSG00000015224	Cyp2j9
13112	1	0.00142547	ENSMUSG00000056035	Cyp3a11
13114	1	0.00142547	ENSMUSG00000038656	Cyp3a16
53973	1	0.00142547	ENSMUSG00000075551	Cyp3a41a
53973	1	0.00142547	ENSMUSG00000075552	Cyp3a41b
13117	1	0.00137376	ENSMUSG00000066072	Cyp4a10
70101	1	0.00142547	ENSMUSG00000048440	Cyp4f16
13121	1	0.00157865	ENSMUSG00000001467	Cyp51
13124	1	0.00157084	ENSMUSG00000050445	Cyp8b1
13166	1	0.000522964	ENSMUSG00000000889	Dbh
13167	1	1.07325e-05	ENSMUSG00000026385	Dbi
13171	1	0.000287825	ENSMUSG00000000340	Dbt
13178	1	0.0011435	ENSMUSG00000029366	Dck
67880	1	0.000885917	ENSMUSG00000039450	Dcxr
13195	1	0.000774689	ENSMUSG00000020182	Ddc
67460	1	0.000254652	ENSMUSG00000028223	Decr1
13244	1	0.000896649	ENSMUSG00000038633	Degs1
13350	1	9.46409e-05	ENSMUSG00000022555	Dgat1
67800	1	9.46409e-05	ENSMUSG00000030747	Dgat2
13139	1	0.0011552	ENSMUSG00000025357	Dgka
217480	1	0.0011552	ENSMUSG00000036095	Dgkb
56077	1	0.0011552	ENSMUSG00000000276	Dgke
27369	1	0.00143035	ENSMUSG00000014554	Dguok
74754	1	0.000528818	ENSMUSG00000034926	Dhcr24
13360	1	0.00103422	ENSMUSG00000058454	Dhcr7
13361	1	0.00155035	ENSMUSG00000021707	Dhfr
56749	1	0.00012196	ENSMUSG00000031730	Dhodh
13382	1	0.000689805	ENSMUSG00000020664	Dld
78920	1	0.000304412	ENSMUSG00000004789	Dlst
13478	1	3.51245e-05	ENSMUSG00000032123	Dpagt1
13479	1	0.000433202	ENSMUSG00000019278	Dpep1
13480	1	4.29299e-05	ENSMUSG00000078919	Dpm1
13481	1	0.000786397	ENSMUSG00000026810	Dpm2
68563	1	4.29299e-05	ENSMUSG00000042737	Dpm3
99586	1	0.000894698	ENSMUSG00000033308	Dpyd
64705	1	0.00103422	ENSMUSG00000022304	Dpys
12934	1	0.00103422	ENSMUSG00000022048	Dpysl2
22240	1	0.00103422	ENSMUSG00000024501	Dpysl3
21915	1	0.00167719	ENSMUSG00000026281	Dtymk
99439	1	0.00100983	ENSMUSG00000033268	Duox1
13177	1	3.41488e-05	ENSMUSG00000024132	Eci1
81701	1	0.00112398	ENSMUSG00000015467	Egfl8
268780	1	2.92704e-05	ENSMUSG00000042961	Egflam
83603	1	0.00150742	ENSMUSG00000032262	Elovl4
13806	1	0.000392223	ENSMUSG00000063524	Eno1
13806	1	0.000392223	ENSMUSG00000059040	Eno1b
13807	1	0.000392223	ENSMUSG00000004267	Eno2
13808	1	0.000392223	ENSMUSG00000060600	Eno3
18605	1	0.00164353	ENSMUSG00000037370	Enpp1
18606	1	0.00145669	ENSMUSG00000022425	Enpp2
12495	1	0.00170549	ENSMUSG00000048120	Entpd1
72090	1	0.00217869	ENSMUSG00000036813	Entpd8
13885	1	0.00105568	ENSMUSG00000021996	Esd
56226	1	0.00112398	ENSMUSG00000028943	Espn
66841	1	0.000122936	ENSMUSG00000027809	Etfdh
75320	1	0.00111618	ENSMUSG00000030275	Etnk1
71760	1	2.92704e-05	ENSMUSG00000019232	Etnppl
14080	1	2.53677e-05	ENSMUSG00000054422	Fabp1
76267	1	0.0012918	ENSMUSG00000010663	Fads1
56473	1	0.001324	ENSMUSG00000024665	Fads2
14085	1	0.00104105	ENSMUSG00000030630	Fah
108160	1	0.00191331	ENSMUSG00000001962	Fam50a
14104	1	0.00229089	ENSMUSG00000025153	Fasn
14121	1	0.000578578	ENSMUSG00000069805	Fbp1
14120	1	0.000578578	ENSMUSG00000021456	Fbp2
434440	1	0.000563943	ENSMUSG00000061701	Fbxw20
14151	1	0.00017172	ENSMUSG00000024588	Fech
14194	1	0.000485888	ENSMUSG00000026526	Fh1
14287	1	0.00165573	ENSMUSG00000009566	Fpgs
75540	1	0.000749322	ENSMUSG00000053870	Fpgt
14317	1	0.000752249	ENSMUSG00000001155	Ftcd
234730	1	0.00110837	ENSMUSG00000033703	Fuk
14381	1	0.000895674	ENSMUSG00000031400	G6pdx
14415	1	0.000765908	ENSMUSG00000070880	Gad1
14417	1	0.000765908	ENSMUSG00000026787	Gad2
73748	1	0.00072493	ENSMUSG00000056880	Gadl1
53897	1	0.000830303	ENSMUSG00000049721	Gal3st1
74246	1	2.7319e-05	ENSMUSG00000028671	Gale
14635	1	0.00111715	ENSMUSG00000020766	Galk1
69976	1	0.00111715	ENSMUSG00000027207	Galk2
14430	1	0.00076103	ENSMUSG00000036073	Galt
14431	1	0.00067517	ENSMUSG00000020150	Gamt
76051	1	0.000411737	ENSMUSG00000062646	Ganc
14433	1	0.000973728	ENSMUSG00000057666	Gapdh
14447	1	0.000973728	ENSMUSG00000061099	Gapdhs
14450	1	0.00132205	ENSMUSG00000022962	Gart
14466	1	0.000446861	ENSMUSG00000028048	Gba
74185	1	5.85408e-06	ENSMUSG00000022707	Gbe1
26912	1	0.000296606	ENSMUSG00000006378	Gcat
14528	1	0.0010391	ENSMUSG00000037580	Gch1
14629	1	0.00133766	ENSMUSG00000032350	Gclc
14630	1	0.00133766	ENSMUSG00000028124	Gclm
68133	1	0.000446861	ENSMUSG00000034424	Gcsh
14544	1	0.00108203	ENSMUSG00000058624	Gda
14583	1	0.000102446	ENSMUSG00000029992	Gfpt1
14584	1	0.000102446	ENSMUSG00000020363	Gfpt2
14593	1	7.41516e-05	ENSMUSG00000021302	Ggps1
14626	1	0.00111715	ENSMUSG00000050553	Gk2
93692	1	0.000904455	ENSMUSG00000021591	Glrx
69367	1	0.000904455	ENSMUSG00000018196	Glrx2
14660	1	0.000114154	ENSMUSG00000026103	Gls
14661	1	0.000558089	ENSMUSG00000021794	Glud1
14645	1	0.00138546	ENSMUSG00000026473	Glul
67942	1	0.00102739	ENSMUSG00000066724	Gm10175
27425	1	0.00102739	ENSMUSG00000067719	Gm10221
15495	1	0.000800057	ENSMUSG00000095388	Gm10681
380920	1	0.0011552	ENSMUSG00000075512	Gm1587
18103	1	0.000750297	ENSMUSG00000091228	Gm20390
13480	1	4.29299e-05	ENSMUSG00000093752	Gm20716
69080	1	0.000849817	ENSMUSG00000033021	Gmppa
66355	1	0.000966898	ENSMUSG00000000253	Gmpr
50798	1	0.00165865	ENSMUSG00000028479	Gne
14711	1	0.000703465	ENSMUSG00000002769	Gnmt
26384	1	0.000457594	ENSMUSG00000052102	Gnpda1
67980	1	0.000457594	ENSMUSG00000029209	Gnpda2
54342	1	0.00109861	ENSMUSG00000037722	Gnpnat1
14718	1	0.000132692	ENSMUSG00000025190	Got1
14719	1	8.09814e-05	ENSMUSG00000031672	Got2
14732	1	7.51273e-05	ENSMUSG00000024978	Gpam
14555	1	0.000800057	ENSMUSG00000023019	Gpd1
14751	1	3.70758e-05	ENSMUSG00000036427	Gpi1
76282	1	0.000811765	ENSMUSG00000022546	Gpt
14775	1	0.000428323	ENSMUSG00000063856	Gpx1
14776	1	0.000428323	ENSMUSG00000042808	Gpx2
69590	1	0.000406858	ENSMUSG00000021760	Gpx8
76238	1	0.00107032	ENSMUSG00000035637	Grhpr
14782	1	0.00134058	ENSMUSG00000031584	Gsr
14854	1	0.00132497	ENSMUSG00000027610	Gss
14874	1	1.95136e-06	ENSMUSG00000021033	Gstz1
60596	1	0.000122936	ENSMUSG00000033910	Gucy1a3
54195	1	0.000122936	ENSMUSG00000028005	Gucy1b3
14917	1	0.000122936	ENSMUSG00000042638	Gucy2c
14918	1	0.000122936	ENSMUSG00000074003	Gucy2d
14919	1	0.000122936	ENSMUSG00000020890	Gucy2e
245650	1	0.000122936	ENSMUSG00000042282	Gucy2f
14923	1	0.000525891	ENSMUSG00000020444	Guk1
27357	1	0.000703465	ENSMUSG00000019528	Gyg
14933	1	0.00111715	ENSMUSG00000025059	Gyk
14625	1	0.00111715	ENSMUSG00000053624	Gykl1
14936	1	0.000703465	ENSMUSG00000003865	Gys1
14979	1	0.000917138	ENSMUSG00000073422	H2-Ke6
15107	1	0.0006098	ENSMUSG00000027984	Hadh
97212	1	0.000891771	ENSMUSG00000025745	Hadha
14651	1	0.00106349	ENSMUSG00000024158	Hagh
68977	1	0.00106349	ENSMUSG00000061046	Haghl
15109	1	6.04921e-05	ENSMUSG00000020017	Hal
15116	1	0.000713222	ENSMUSG00000003665	Has1
15117	1	0.000713222	ENSMUSG00000022367	Has2
15118	1	0.000713222	ENSMUSG00000031910	Has3
23900	1	0.00132302	ENSMUSG00000064109	Hcst
15186	1	0.000715173	ENSMUSG00000027360	Hdc
15203	1	0.00113471	ENSMUSG00000031209	Heph
15233	1	0.000755176	ENSMUSG00000022821	Hgd
58875	1	0.000360026	ENSMUSG00000029776	Hibadh
233020	1	0.000887868	ENSMUSG00000040424	Hipk4
15275	1	0.00122448	ENSMUSG00000037012	Hk1
15277	1	0.00122448	ENSMUSG00000000628	Hk2
15288	1	0.000425396	ENSMUSG00000032126	Hmbs
15356	1	4.29299e-05	ENSMUSG00000028672	Hmgcl
15357	1	0.00102349	ENSMUSG00000021670	Hmgcr
15360	1	0.000842011	ENSMUSG00000027875	Hmgcs2
15368	1	0.00137181	ENSMUSG00000005413	Hmox1
15369	1	0.00137181	ENSMUSG00000004070	Hmox2
15445	1	0.00015123	ENSMUSG00000029445	Hpd
15452	1	0.000123911	ENSMUSG00000025630	Hprt
15485	1	0.000917138	ENSMUSG00000019301	Hsd17b1
15108	1	0.000613702	ENSMUSG00000025260	Hsd17b10
15488	1	0.00185086	ENSMUSG00000024507	Hsd17b4
15493	1	0.000795179	ENSMUSG00000063730	Hsd3b2
15494	1	0.000795179	ENSMUSG00000062410	Hsd3b3
15495	1	0.000800057	ENSMUSG00000095143	Hsd3b4
15496	1	0.000800057	ENSMUSG00000038092	Hsd3b5
15497	1	0.000800057	ENSMUSG00000027869	Hsd3b6
15926	1	0.00100007	ENSMUSG00000025950	Idh1
67834	1	0.000252701	ENSMUSG00000032279	Idh3a
15929	1	0.000252701	ENSMUSG00000002010	Idh3g
55980	1	0.000569797	ENSMUSG00000027531	Impa1
23917	1	0.00118252	ENSMUSG00000003500	Impdh1
23918	1	0.00118252	ENSMUSG00000062867	Impdh2
21743	1	0.000676146	ENSMUSG00000003477	Inmt
16329	1	0.000573699	ENSMUSG00000026102	Inpp1
269180	1	0.000751273	ENSMUSG00000026113	Inpp4a
16330	1	0.000723954	ENSMUSG00000028894	Inpp5b
16331	1	0.0006459	ENSMUSG00000026288	Inpp5d
64436	1	0.000723954	ENSMUSG00000026925	Inpp5e
16332	1	0.0006459	ENSMUSG00000032737	Inppl1
64602	1	1.46352e-05	ENSMUSG00000032293	Ireb2
71780	1	2.92704e-05	ENSMUSG00000019139	Isyna1
16434	1	0.00116984	ENSMUSG00000074797	Itpa
228550	1	0.00113959	ENSMUSG00000027296	Itpka
70750	1	0.000885917	ENSMUSG00000009905	Kdsr
16548	1	0.00112593	ENSMUSG00000029162	Khk
16591	1	0.00119618	ENSMUSG00000058488	Kl
98256	1	0.00136693	ENSMUSG00000039783	Kmo
70789	1	0.00106349	ENSMUSG00000026866	Kynu
66988	1	0.000400028	ENSMUSG00000039682	Lap3
16828	1	0.00114252	ENSMUSG00000063229	Ldha
16832	1	0.00114252	ENSMUSG00000030246	Ldhb
16833	1	0.00114252	ENSMUSG00000030851	Ldhc
52815	1	0.000829327	ENSMUSG00000031958	Ldhd
13590	1	0.000658583	ENSMUSG00000038793	Lefty1
56401	1	0.000209771	ENSMUSG00000028641	Lepre1
210530	1	0.000209771	ENSMUSG00000038168	Leprel1
14789	1	0.000209771	ENSMUSG00000023191	Leprel2
16881	1	0.000387345	ENSMUSG00000056394	Lig1
16882	1	0.000387345	ENSMUSG00000020697	Lig3
16956	1	0.00106447	ENSMUSG00000015568	Lpl
16993	1	0.000379539	ENSMUSG00000015889	Lta4h
17161	1	0.000601018	ENSMUSG00000025037	Maoa
11720	1	0.000892747	ENSMUSG00000037798	Mat1a
72039	1	0.000306363	ENSMUSG00000027709	Mccc1
78038	1	0.000306363	ENSMUSG00000021646	Mccc2
17449	1	0.00080396	ENSMUSG00000020321	Mdh1
76668	1	0.00080396	ENSMUSG00000025963	Mdh1b
17448	1	0.000369782	ENSMUSG00000019179	Mdh2
17436	1	0.000303436	ENSMUSG00000032418	Me1
26922	1	0.00101763	ENSMUSG00000028910	Mecr
23945	1	0.0010352	ENSMUSG00000033174	Mgll
56727	1	0.00114057	ENSMUSG00000022613	Miox
170790	1	0.00117082	ENSMUSG00000035805	Mlc1
56690	1	0.00096202	ENSMUSG00000074064	Mlycd
105450	1	0.000966898	ENSMUSG00000041445	Mmrn2
68393	1	9.75679e-05	ENSMUSG00000012187	Mogat1
59012	1	0.000522964	ENSMUSG00000020000	Moxd1
17711	1	0.000966898	ENSMUSG00000064370	mt-Cytb
17716	1	0.00112691	ENSMUSG00000064341	mt-Nd1
17717	1	0.00112691	ENSMUSG00000064345	mt-Nd2
17718	1	0.00112691	ENSMUSG00000064360	mt-Nd3
17719	1	0.00112691	ENSMUSG00000064363	mt-Nd4
17720	1	0.00112691	ENSMUSG00000065947	mt-Nd4l
17721	1	0.00112691	ENSMUSG00000064367	mt-Nd5
17722	1	0.00112691	ENSMUSG00000064368	mt-Nd6
66902	1	0.000168793	ENSMUSG00000062937	Mtap
17768	1	0.000520037	ENSMUSG00000005667	Mthfd2
17769	1	0.000891771	ENSMUSG00000029009	Mthfr
74302	1	0.000635167	ENSMUSG00000034354	Mtmr3
17855	1	0.00114057	ENSMUSG00000041939	Mvk
17919	1	0.0018694	ENSMUSG00000025885	Myo5b
100070	1	0.00142547	NA	NA
100160	1	0.00105276	NA	NA
100680	1	0.00121862	NA	NA
100700	1	0.00164695	NA	NA
102250	1	8.78111e-05	NA	NA
102450	1	0.00111325	NA	NA
103150	1	0.00128009	NA	NA
103990	1	0.00122448	NA	NA
104020	1	0.000723954	NA	NA
104090	1	0.00190843	NA	NA
104170	1	0.000537599	NA	NA
104780	1	0.000305388	NA	NA
105010	1	0.000926895	NA	NA
105240	1	0.000999096	NA	NA
105350	1	0.00102641	NA	NA
105660	1	0.00119326	NA	NA
106530	1	0.000903479	NA	NA
106560	1	0.00156011	NA	NA
107030	1	0.000310266	NA	NA
107140	1	0.00142547	NA	NA
107270	1	0.000712246	NA	NA
107480	1	0.00131814	NA	NA
107570	1	0.00058931	NA	NA
107600	1	0.000811765	NA	NA
107750	1	0.00146742	NA	NA
107870	1	0.00120692	NA	NA
107880	1	0.000627362	NA	NA
108040	1	0.000450764	NA	NA
108080	1	0.00127033	NA	NA
108640	1	0.000892747	NA	NA
108680	1	0.000811765	NA	NA
108840	1	0.000926895	NA	NA
109260	1	0.000122936	NA	NA
109670	1	0.0011474	NA	NA
109730	1	0.00139815	NA	NA
109780	1	0.000892747	NA	NA
109800	1	3.31731e-05	NA	NA
109860	1	0.000887868	NA	NA
110070	1	0.000278069	NA	NA
110080	1	0.000597116	NA	NA
110100	1	0.000597116	NA	NA
110120	1	0.000367831	NA	NA
110200	1	0.00161768	NA	NA
110210	1	0.000281971	NA	NA
110390	1	0.000900552	NA	NA
110420	1	0.000743468	NA	NA
110450	1	9.07382e-05	NA	NA
110520	1	0.0011552	NA	NA
110640	1	0.000979582	NA	NA
110700	1	0.00236944	NA	NA
110820	1	0.000320023	NA	NA
110860	1	0.00108008	NA	NA
110900	1	0.000940555	NA	NA
110910	1	0.000178549	NA	NA
110940	1	0.0016811	NA	NA
110950	1	0.00126643	NA	NA
111180	1	0.00101763	NA	NA
114140	1	0.0016811	NA	NA
114660	1	0.000569797	NA	NA
114880	1	0.00123911	NA	NA
116910	1	0.000750297	NA	NA
140480	1	0.000699562	NA	NA
140490	1	0.0016811	NA	NA
140920	1	0.00170354	NA	NA
170440	1	0.000882014	NA	NA
170840	1	0.0006459	NA	NA
171280	1	0.00124009	NA	NA
171570	1	0.00070444	NA	NA
192180	1	0.00129668	NA	NA
207180	1	0.000512232	NA	NA
207730	1	0.00116691	NA	NA
208210	1	0.000682975	NA	NA
208280	1	0.00137278	NA	NA
208450	1	4.29299e-05	NA	NA
208660	1	0.000885917	NA	NA
208720	1	0.00123716	NA	NA
208980	1	3.61001e-05	NA	NA
209030	1	0.000429299	NA	NA
209560	1	0.00145669	NA	NA
209690	1	0.000242944	NA	NA
210040	1	0.000347342	NA	NA
210110	1	0.000729808	NA	NA
211350	1	0.00174647	NA	NA
211390	1	0.00143815	NA	NA
212030	1	0.00122448	NA	NA
212110	1	0.0006459	NA	NA
212650	1	0.00180988	NA	NA
212860	1	0.00070444	NA	NA
213040	1	0.00117082	NA	NA
213950	1	0.00109618	NA	NA
214080	1	0.00169866	NA	NA
214250	1	0.00111618	NA	NA
214590	1	0.00100983	NA	NA
215340	1	0.00094153	NA	NA
215450	1	0.00170549	NA	NA
216020	1	0.00122448	NA	NA
216130	1	0.00111715	NA	NA
216230	1	0.00170354	NA	NA
216340	1	0.000131717	NA	NA
216460	1	0.000114154	NA	NA
217840	1	0.0011074	NA	NA
218140	1	0.000386369	NA	NA
223710	1	0.00142547	NA	NA
223750	1	0.0011113	NA	NA
224130	1	0.000347342	NA	NA
225330	1	0.00120106	NA	NA
225580	1	0.000445398	NA	NA
225790	1	0.000866403	NA	NA
225890	1	0.00112691	NA	NA
225990	1	0.00111032	NA	NA
226100	1	0.00142547	NA	NA
226140	1	0.00142547	NA	NA
226410	1	0.000511256	NA	NA
226520	1	0.00105861	NA	NA
226650	1	0.00112691	NA	NA
227000	1	0.000999096	NA	NA
227100	1	0.000478083	NA	NA
227200	1	0.00112691	NA	NA
227230	1	0.000404907	NA	NA
227330	1	0.00168695	NA	NA
227660	1	0.000804935	NA	NA
228030	1	0.00102739	NA	NA
228370	1	3.12217e-05	NA	NA
229360	1	0.00162158	NA	NA
229660	1	0.0011474	NA	NA
229710	1	0.000405883	NA	NA
229950	1	0.000643948	NA	NA
230080	1	0.00112691	NA	NA
230100	1	0.000554186	NA	NA
230460	1	0.00142547	NA	NA
230720	1	0.000616629	NA	NA
231090	1	0.000633216	NA	NA
231330	1	0.000524915	NA	NA
231690	1	0.000788349	NA	NA
232090	1	0.000892747	NA	NA
232490	1	0.000703465	NA	NA
232980	1	0.00242261	NA	NA
233010	1	0.00113959	NA	NA
233550	1	9.75679e-05	NA	NA
234520	1	0.00054638	NA	NA
234780	1	0.00123911	NA	NA
234890	1	0.000122936	NA	NA
235030	1	0.000922017	NA	NA
235340	1	0.000429299	NA	NA
235500	1	0.000691757	NA	NA
236540	1	0.000802008	NA	NA
237820	1	0.00171915	NA	NA
238500	1	0.000687854	NA	NA
238870	1	0.00111423	NA	NA
239020	1	0.000716149	NA	NA
239130	1	0.000122936	NA	NA
239270	1	0.00172012	NA	NA
239610	1	0.000813716	NA	NA
240750	1	0.00126546	NA	NA
242200	1	0.00108008	NA	NA
242280	1	0.000926895	NA	NA
242340	1	0.0016811	NA	NA
242550	1	0.00142547	NA	NA
242610	1	0.00106837	NA	NA
243540	1	0.000378564	NA	NA
245850	1	0.000409785	NA	NA
246220	1	0.000911284	NA	NA
246280	1	0.000716149	NA	NA
266640	1	0.000696635	NA	NA
266740	1	0.00138546	NA	NA
268660	1	0.000796154	NA	NA
269380	1	0.000405883	NA	NA
269440	1	0.00123911	NA	NA
269620	1	0.00123911	NA	NA
269950	1	0.00078347	NA	NA
270080	1	0.000972752	NA	NA
270200	1	0.00167817	NA	NA
270680	1	0.000464423	NA	NA
271640	1	0.000347342	NA	NA
277970	1	0.000940555	NA	NA
319580	1	0.000387345	NA	NA
319940	1	0.00098446	NA	NA
320210	1	0.00197673	NA	NA
320400	1	0.00113959	NA	NA
320450	1	0.000202941	NA	NA
320630	1	0.000619556	NA	NA
320680	1	0.00108496	NA	NA
320710	1	0.00111423	NA	NA
320950	1	0.000208795	NA	NA
327940	1	0.000403931	NA	NA
327950	1	0.000709319	NA	NA
330060	1	0.00185477	NA	NA
331030	1	0.000849817	NA	NA
337920	1	0.00142547	NA	NA
338380	1	0.0016811	NA	NA
338400	1	0.000473204	NA	NA
381000	1	0.00142547	NA	NA
382980	1	0.00121082	NA	NA
407780	1	0.00112691	NA	NA
433020	1	0.00123911	NA	NA
433250	1	0.00142547	NA	NA
433260	1	0.000490767	NA	NA
433920	1	0.000544429	NA	NA
435820	1	0.000820546	NA	NA
545120	1	0.00142547	NA	NA
595140	1	0.00112691	NA	NA
619650	1	0.00113081	NA	NA
625250	1	0.000522964	NA	NA
626570	1	0.000709319	NA	NA
628000	1	0.00102739	NA	NA
629200	1	0.000680048	NA	NA
633980	1	0.000475156	NA	NA
665100	1	0.00142547	NA	NA
665560	1	0.00103617	NA	NA
667030	1	0.000888844	NA	NA
100040000	1	0.00227138	NA	NA
100860000	1	0.00124106	NA	NA
102220000	1	0.000482961	NA	NA
102640000	1	0.00106642	NA	NA
68646	1	0.00129668	ENSMUSG00000022253	Nadk2
78914	1	0.00155718	ENSMUSG00000031090	Nadsyn1
56174	1	0.0011152	ENSMUSG00000034744	Nagk
338370	1	0.00048101	ENSMUSG00000000197	Nalcn
94181	1	0.000562967	ENSMUSG00000028334	Nans
54405	1	0.00112691	ENSMUSG00000016427	Ndufa1
67273	1	0.00112691	ENSMUSG00000026260	Ndufa10
69875	1	0.00112691	ENSMUSG00000002379	Ndufa11
66414	1	0.00112691	ENSMUSG00000020022	Ndufa12
67184	1	0.00112691	ENSMUSG00000036199	Ndufa13
17991	1	0.00112691	ENSMUSG00000014294	Ndufa2
66091	1	0.00112691	ENSMUSG00000035674	Ndufa3
17992	1	0.00112691	ENSMUSG00000029632	Ndufa4
68202	1	0.00112691	ENSMUSG00000023089	Ndufa5
67130	1	0.00112691	ENSMUSG00000022450	Ndufa6
66416	1	0.00112691	ENSMUSG00000041881	Ndufa7
68375	1	0.00112691	ENSMUSG00000026895	Ndufa8
66108	1	0.00112691	ENSMUSG00000000399	Ndufa9
70316	1	0.00112691	ENSMUSG00000030869	Ndufab1
68342	1	0.00112691	ENSMUSG00000040048	Ndufb10
68198	1	0.00112691	ENSMUSG00000002416	Ndufb2
66495	1	0.00112691	ENSMUSG00000026032	Ndufb3
68194	1	0.00112691	ENSMUSG00000022820	Ndufb4
66046	1	0.00112691	ENSMUSG00000027673	Ndufb5
66916	1	0.00112691	ENSMUSG00000033938	Ndufb7
67264	1	0.00112691	ENSMUSG00000025204	Ndufb8
66218	1	0.00112691	ENSMUSG00000022354	Ndufb9
66377	1	0.00112691	ENSMUSG00000037152	Ndufc1
68197	1	0.00112691	ENSMUSG00000030647	Ndufc2
68349	1	0.00112691	ENSMUSG00000005510	Ndufs3
17993	1	0.00112691	ENSMUSG00000021764	Ndufs4
75406	1	0.00112691	ENSMUSG00000020153	Ndufs7
17995	1	0.00112691	ENSMUSG00000037916	Ndufv1
72900	1	0.00112691	ENSMUSG00000024099	Ndufv2
78330	1	0.00112691	ENSMUSG00000024038	Ndufv3
243880	1	0.00142547	ENSMUSG00000040601	Nlrp4a
18102	1	0.000750297	ENSMUSG00000037601	Nme1
18103	1	0.000750297	ENSMUSG00000020857	Nme2
79059	1	0.00070444	ENSMUSG00000073435	Nme3
56520	1	0.000114154	ENSMUSG00000024177	Nme4
75533	1	0.000475156	ENSMUSG00000035984	Nme5
54369	1	0.00070444	ENSMUSG00000032478	Nme6
66454	1	0.000999096	ENSMUSG00000028992	Nmnat1
74080	1	0.00105861	ENSMUSG00000032456	Nmnat3
18113	1	2.34163e-05	ENSMUSG00000032271	Nnmt
18125	1	0.00139522	ENSMUSG00000029361	Nos1
18126	1	0.00139522	ENSMUSG00000020826	Nos2
18127	1	0.00139522	ENSMUSG00000028978	Nos3
18160	1	0.000122936	ENSMUSG00000027931	Npr1
18195	1	0.00102739	ENSMUSG00000034187	Nsf
50773	1	0.000580529	ENSMUSG00000020736	Nt5c
70881	1	0.000646875	ENSMUSG00000020622	Nt5c1b
76952	1	0.000607848	ENSMUSG00000025041	Nt5c2
68106	1	0.000616629	ENSMUSG00000017176	Nt5c3b
103850	1	0.000124887	ENSMUSG00000032615	Nt5m
67993	1	9.85436e-05	ENSMUSG00000024228	Nudt12
66401	1	0.00133961	ENSMUSG00000028443	Nudt2
53893	1	0.00110154	ENSMUSG00000025817	Nudt5
18242	1	4.58569e-05	ENSMUSG00000030934	Oat
18263	1	0.00071127	ENSMUSG00000011179	Odc1
18293	1	0.000304412	ENSMUSG00000020456	Ogdh
75475	1	0.0016928	ENSMUSG00000022562	Oplah
18416	1	0.000922017	ENSMUSG00000031173	Otc
71147	1	0.000454667	ENSMUSG00000021786	Oxsm
18472	1	0.00105276	ENSMUSG00000020745	Pafah1b1
18475	1	0.00105276	ENSMUSG00000003131	Pafah1b2
18476	1	0.00105276	ENSMUSG00000005447	Pafah1b3
67054	1	0.00133766	ENSMUSG00000029247	Paics
75735	1	0.00174647	ENSMUSG00000033610	Pank1
74450	1	0.00174647	ENSMUSG00000037514	Pank2
23971	1	0.00120789	ENSMUSG00000028032	Papss1
23972	1	0.00120789	ENSMUSG00000024899	Papss2
13180	1	0.000386369	ENSMUSG00000020098	Pcbd1
72562	1	4.8784e-06	ENSMUSG00000021496	Pcbd2
66904	1	0.000320023	ENSMUSG00000032527	Pccb
18534	1	0.0001083	ENSMUSG00000027513	Pck1
74551	1	5.1711e-05	ENSMUSG00000040618	Pck2
18563	1	0.000319047	ENSMUSG00000024892	Pcx
13026	1	0.000743468	ENSMUSG00000005615	Pcyt1a
68671	1	0.000742492	ENSMUSG00000025137	Pcyt2
23984	1	0.00116691	ENSMUSG00000023868	Pde10a
18573	1	0.00116691	ENSMUSG00000059173	Pde1a
18574	1	0.00116691	ENSMUSG00000022489	Pde1b
18575	1	0.00116691	ENSMUSG00000004347	Pde1c
54611	1	0.00116691	ENSMUSG00000041741	Pde3a
18576	1	0.00116691	ENSMUSG00000030671	Pde3b
18577	1	0.00111423	ENSMUSG00000032177	Pde4a
18578	1	0.00111423	ENSMUSG00000028525	Pde4b
225600	1	0.00108008	ENSMUSG00000024575	Pde6a
18587	1	0.00108008	ENSMUSG00000029491	Pde6b
18582	1	0.00108008	ENSMUSG00000026239	Pde6d
18588	1	0.00108008	ENSMUSG00000025386	Pde6g
78600	1	0.00108008	ENSMUSG00000064330	Pde6h
18583	1	0.00111423	ENSMUSG00000069094	Pde7a
29863	1	0.00111423	ENSMUSG00000019990	Pde7b
18584	1	0.00111423	ENSMUSG00000025584	Pde8a
18585	1	0.00108008	ENSMUSG00000041119	Pde9a
18597	1	0.00119716	ENSMUSG00000031299	Pdha1
18598	1	0.00119716	ENSMUSG00000047674	Pdha2
68263	1	0.00119716	ENSMUSG00000021748	Pdhb
27402	1	0.000344415	ENSMUSG00000010914	Pdhx
236900	1	0.000743468	ENSMUSG00000035232	Pdk3
18618	1	0.000249774	ENSMUSG00000000301	Pemt
18624	1	0.000428323	ENSMUSG00000063931	Pepd
18639	1	0.00167817	ENSMUSG00000025271	Pfkfb1
18640	1	0.00167817	ENSMUSG00000026409	Pfkfb2
18641	1	0.00113959	ENSMUSG00000020277	Pfkl
18642	1	0.00113959	ENSMUSG00000033065	Pfkm
56421	1	0.00113959	ENSMUSG00000021196	Pfkp
18648	1	0.00122253	ENSMUSG00000011752	Pgam1
56012	1	0.00122253	ENSMUSG00000020475	Pgam2
18655	1	0.00048101	ENSMUSG00000062070	Pgk1
18655	1	0.00048101	ENSMUSG00000066632	Pgk1-rs7
18663	1	0.00048101	ENSMUSG00000031233	Pgk2
66171	1	0.00102934	ENSMUSG00000031807	Pgls
66681	1	3.70758e-05	ENSMUSG00000029171	Pgm1
72157	1	3.51245e-05	ENSMUSG00000025791	Pgm2
74451	1	0.000671267	ENSMUSG00000017715	Pgs1
84095	1	0.0012879	ENSMUSG00000025178	Pi4k2a
224020	1	0.00154938	ENSMUSG00000041720	Pi4ka
107650	1	0.00165085	ENSMUSG00000038861	Pi4kb
18700	1	0.000743468	ENSMUSG00000031381	Piga
67292	1	0.000743468	ENSMUSG00000026698	Pigc
56176	1	0.000743468	ENSMUSG00000022940	Pigp
14755	1	0.000743468	ENSMUSG00000025728	Pigq
70325	1	7.31759e-05	ENSMUSG00000045140	Pigw
18704	1	0.00126546	ENSMUSG00000030660	Pik3c2a
18705	1	0.00126546	ENSMUSG00000030228	Pik3c2g
18706	1	0.00132302	ENSMUSG00000027665	Pik3ca
74769	1	0.00132302	ENSMUSG00000032462	Pik3cb
18707	1	0.00132302	ENSMUSG00000039936	Pik3cd
30955	1	0.00132302	ENSMUSG00000020573	Pik3cg
18708	1	0.00132302	ENSMUSG00000041417	Pik3r1
18709	1	0.00132302	ENSMUSG00000031834	Pik3r2
18710	1	0.00132302	ENSMUSG00000028698	Pik3r3
18711	1	0.00118545	ENSMUSG00000025949	Pikfyve
18718	1	0.00127033	ENSMUSG00000026737	Pip4k2a
117150	1	0.00138839	ENSMUSG00000025417	Pip4k2c
18720	1	0.00132302	ENSMUSG00000028126	Pip5k1a
18719	1	0.00132302	ENSMUSG00000024867	Pip5k1b
18717	1	0.00132302	ENSMUSG00000034902	Pip5k1c
18770	1	0.00164792	ENSMUSG00000041237	Pklr
18746	1	0.00166646	ENSMUSG00000032294	Pkm
18783	1	0.00103032	ENSMUSG00000056220	Pla2g4a
53357	1	0.00103812	ENSMUSG00000042632	Pla2g6
18795	1	0.00125277	ENSMUSG00000051177	Plcb1
18796	1	0.00123911	ENSMUSG00000040061	Plcb2
18797	1	0.00123911	ENSMUSG00000024960	Plcb3
18798	1	0.00123911	ENSMUSG00000039943	Plcb4
18799	1	0.00123911	ENSMUSG00000010660	Plcd1
72469	1	0.00123911	ENSMUSG00000020937	Plcd3
18802	1	0.00123911	ENSMUSG00000026173	Plcd4
74055	1	0.00123911	ENSMUSG00000024998	Plce1
18803	1	0.00123911	ENSMUSG00000016933	Plcg1
227120	1	0.00123911	ENSMUSG00000038349	Plcl1
18806	1	0.00113667	ENSMUSG00000020828	Pld2
18822	1	0.000859573	ENSMUSG00000019055	Plod1
26432	1	0.000859573	ENSMUSG00000032374	Plod2
26433	1	0.000859573	ENSMUSG00000004846	Plod3
29858	1	1.56109e-05	ENSMUSG00000022474	Pmm1
54128	1	1.56109e-05	ENSMUSG00000022711	Pmm2
68603	1	0.000470277	ENSMUSG00000027952	Pmvk
18948	1	0.000687854	ENSMUSG00000038216	Pnmt
18950	1	0.000179525	ENSMUSG00000021871	Pnp
67895	1	0.00126253	ENSMUSG00000020089	Ppa1
74776	1	0.000296606	ENSMUSG00000028013	Ppa2
19012	1	0.00058931	ENSMUSG00000021759	Ppap2a
67916	1	0.00058931	ENSMUSG00000028517	Ppap2b
50784	1	0.00058931	ENSMUSG00000052151	Ppap2c
66812	1	0.000709319	ENSMUSG00000063849	Ppcdc
19044	1	9.36652e-05	ENSMUSG00000062729	Ppox
19063	1	0.00112398	ENSMUSG00000028657	Ppt1
54397	1	0.00112398	ENSMUSG00000015474	Ppt2
18477	1	0.000428323	ENSMUSG00000028691	Prdx1
21672	1	0.000428323	ENSMUSG00000005161	Prdx2
11757	1	9.46409e-05	ENSMUSG00000024997	Prdx3
19125	1	0.000403931	ENSMUSG00000003526	Prodh
56189	1	0.000817619	ENSMUSG00000036892	Prodh2
19139	1	0.000979582	ENSMUSG00000031432	Prps1
75456	1	0.000979582	ENSMUSG00000092305	Prps1l1
214580	1	0.000463448	ENSMUSG00000063179	Pstk
19211	1	0.000603945	ENSMUSG00000013663	Pten
19224	1	0.00156792	ENSMUSG00000047250	Ptgs1
19225	1	0.00156792	ENSMUSG00000032487	Ptgs2
19286	1	0.000362953	ENSMUSG00000032067	Pts
69051	1	0.0010391	ENSMUSG00000026520	Pycr2
66194	1	0.0010391	ENSMUSG00000022571	Pycrl
19309	1	0.000597116	ENSMUSG00000032648	Pygm
67375	1	0.000800057	ENSMUSG00000030674	Qprt
71336	1	0.00112203	ENSMUSG00000029136	Rbks
241490	1	0.00116691	ENSMUSG00000042369	Rbm45
98711	1	0.00090543	ENSMUSG00000025921	Rdh10
17252	1	0.000926895	ENSMUSG00000066441	Rdh11
77974	1	0.000926895	ENSMUSG00000021123	Rdh12
19682	1	0.00083323	ENSMUSG00000025350	Rdh5
54150	1	0.000811765	ENSMUSG00000040134	Rdh7
19703	1	2.92704e-06	ENSMUSG00000031387	Renbp
54391	1	0.00111227	ENSMUSG00000024712	Rfk
19743	1	0.000805911	ENSMUSG00000023926	Rhag
58176	1	0.000805911	ENSMUSG00000001417	Rhbg
108660	1	0.0016811	ENSMUSG00000020496	Rnf187
19982	1	0.000782495	ENSMUSG00000079435	Rpl36a
19982	1	0.000782495	ENSMUSG00000049751	Rpl36al
20133	1	0.00070444	ENSMUSG00000030978	Rrm1
20135	1	0.00070444	ENSMUSG00000020649	Rrm2
69519	1	0.00121472	ENSMUSG00000032417	Rwdd2a
20249	1	0.00132205	ENSMUSG00000037071	Scd1
110880	1	0.00169866	ENSMUSG00000001027	Scn4a
20397	1	0.00123033	ENSMUSG00000020097	Sgpl1
57028	1	0.000551259	ENSMUSG00000022436	Sh3bp1
20425	1	0.000450764	ENSMUSG00000020534	Shmt1
110380	1	0.00111423	ENSMUSG00000045180	Shroom2
69983	1	0.000810789	ENSMUSG00000027790	Sis
18174	1	0.000755176	ENSMUSG00000023030	Slc11a2
56643	1	0.000758103	ENSMUSG00000025557	Slc15a1
57738	1	0.000752249	ENSMUSG00000022899	Slc15a2
20501	1	0.00120594	ENSMUSG00000032902	Slc16a1
80879	1	0.000815668	ENSMUSG00000025161	Slc16a3
20503	1	0.000848841	ENSMUSG00000020102	Slc16a7
57274	1	0.000782495	ENSMUSG00000032988	Slc16a8
72961	1	0.00170354	ENSMUSG00000070570	Slc17a7
20508	1	0.00165085	ENSMUSG00000100241	Slc18a3
20509	1	0.000468326	ENSMUSG00000001436	Slc19a1
80721	1	0.000757127	ENSMUSG00000038496	Slc19a3
20510	1	0.00106837	ENSMUSG00000024935	Slc1a1
20511	1	0.00106837	ENSMUSG00000005089	Slc1a2
20512	1	0.00106837	ENSMUSG00000005360	Slc1a3
20513	1	0.00106837	ENSMUSG00000005357	Slc1a6
102570	1	0.000751273	ENSMUSG00000074028	Slc22a13
30805	1	0.000764933	ENSMUSG00000020334	Slc22a4
20522	1	0.00186257	ENSMUSG00000024354	Slc23a1
54338	1	0.00186257	ENSMUSG00000027340	Slc23a2
13358	1	0.00186843	ENSMUSG00000003528	Slc25a1
27376	1	0.000287825	ENSMUSG00000025792	Slc25a10
67863	1	5.4638e-05	ENSMUSG00000014606	Slc25a11
78830	1	0.000909333	ENSMUSG00000027010	Slc25a12
50799	1	0.000909333	ENSMUSG00000015112	Slc25a13
20523	1	0.000820546	ENSMUSG00000031105	Slc25a14
18408	1	0.000885917	ENSMUSG00000031482	Slc25a15
73132	1	9.56166e-05	ENSMUSG00000071253	Slc25a16
71803	1	0.000880063	ENSMUSG00000004902	Slc25a18
67283	1	0.000658583	ENSMUSG00000020744	Slc25a19
83885	1	0.000885917	ENSMUSG00000050304	Slc25a2
68267	1	0.000880063	ENSMUSG00000019082	Slc25a22
67582	1	2.34163e-05	ENSMUSG00000045100	Slc25a26
74011	1	0.000820546	ENSMUSG00000023912	Slc25a27
11739	1	0.000544429	ENSMUSG00000031633	Slc25a4
11740	1	0.000544429	ENSMUSG00000016319	Slc25a5
26458	1	0.000693708	ENSMUSG00000027359	Slc27a2
26569	1	0.000716149	ENSMUSG00000059316	Slc27a4
26459	1	0.00066834	ENSMUSG00000030382	Slc27a5
20525	1	0.000854695	ENSMUSG00000028645	Slc2a1
20526	1	0.000852744	ENSMUSG00000027690	Slc2a2
20527	1	0.000845914	ENSMUSG00000003153	Slc2a3
20528	1	0.000828352	ENSMUSG00000018566	Slc2a4
56485	1	0.000820546	ENSMUSG00000028976	Slc2a5
56017	1	0.00083323	ENSMUSG00000026791	Slc2a8
22348	1	0.00171817	ENSMUSG00000037771	Slc32a1
11416	1	1.75622e-05	ENSMUSG00000027822	Slc33a1
103710	1	0.0016811	ENSMUSG00000048807	Slc35e4
14385	1	1.65865e-05	ENSMUSG00000032114	Slc37a4
76257	1	0.00107422	ENSMUSG00000010064	Slc38a3
52466	1	0.000756151	ENSMUSG00000020829	Slc46a1
94229	1	0.0010469	ENSMUSG00000026904	Slc4a10
59033	1	0.0010469	ENSMUSG00000023032	Slc4a8
52710	1	0.00165085	ENSMUSG00000022560	Slc52a2
26570	1	6.14678e-05	ENSMUSG00000027737	Slc7a11
20544	1	0.000999096	ENSMUSG00000028854	Slc9a1
20603	1	0.000654681	ENSMUSG00000071708	Sms
20652	1	6.34192e-05	ENSMUSG00000026600	Soat1
223920	1	7.02489e-05	ENSMUSG00000023045	Soat2
20655	1	0.000836157	ENSMUSG00000022982	Sod1
20656	1	0.000188306	ENSMUSG00000006818	Sod2
20322	1	0.000802008	ENSMUSG00000027227	Sord
56632	1	0.00111032	ENSMUSG00000057342	Sphk2
433180	1	0.000392223	ENSMUSG00000055095	Spink6
20751	1	0.000892747	ENSMUSG00000033735	Spr
20773	1	0.000796154	ENSMUSG00000021036	Sptlc2
20810	1	0.000658583	ENSMUSG00000006442	Srm
20916	1	0.000203917	ENSMUSG00000022110	Sucla2
56451	1	0.000217576	ENSMUSG00000052738	Suclg1
20917	1	0.000130741	ENSMUSG00000061838	Suclg2
20887	1	0.000680048	ENSMUSG00000030711	Sult1a1
20860	1	0.000683951	ENSMUSG00000029272	Sult1e1
20859	1	0.000682	ENSMUSG00000078798	Sult2a1
54200	1	0.000689805	ENSMUSG00000003271	Sult2b1
20975	1	0.000663462	ENSMUSG00000023805	Synj2
27060	1	0.0016811	ENSMUSG00000001750	Tcirg1
56720	1	0.00011513	ENSMUSG00000028011	Tdo2
21823	1	0.000134644	ENSMUSG00000000214	Th
21877	1	0.00112008	ENSMUSG00000025574	Tk1
57813	1	0.00139717	ENSMUSG00000035824	Tk2
107770	1	0.000755176	ENSMUSG00000036151	Tm6sf2
66260	1	0.00113374	ENSMUSG00000028786	Tmem54
21990	1	0.000131717	ENSMUSG00000040046	Tph1
29807	1	0.000964947	ENSMUSG00000029735	Tpk1
22018	1	0.0010752	ENSMUSG00000020673	Tpo
12751	1	0.000410761	ENSMUSG00000030894	Tpp1
22117	1	0.000174647	ENSMUSG00000044986	Tst
22122	1	0.000888844	ENSMUSG00000022570	Tsta3
80286	1	0.00112691	ENSMUSG00000039530	Tusc3
353170	1	0.000804935	ENSMUSG00000038344	Txlng
50493	1	0.000887868	ENSMUSG00000020250	Txnrd1
72962	1	0.000177574	ENSMUSG00000022615	Tymp
22171	1	1.85379e-05	ENSMUSG00000025747	Tyms
22173	1	0.000500523	ENSMUSG00000004651	Tyr
227620	1	0.00078347	ENSMUSG00000026956	Uap1l1
22245	1	0.00120887	ENSMUSG00000002550	Uck1
80914	1	0.00120887	ENSMUSG00000026558	Uck2
68556	1	0.00135815	ENSMUSG00000089917	Uckl1
22227	1	0.000820546	ENSMUSG00000031710	Ucp1
22228	1	0.000820546	ENSMUSG00000033685	Ucp2
22229	1	0.000820546	ENSMUSG00000032942	Ucp3
54122	1	0.00121277	ENSMUSG00000043262	Uevld
22235	1	0.00118935	ENSMUSG00000029201	Ugdh
22247	1	0.000789325	ENSMUSG00000022814	Umps
22271	1	0.000183428	ENSMUSG00000020407	Upp1
76654	1	0.00019416	ENSMUSG00000026839	Upp2
66152	1	0.000966898	ENSMUSG00000059534	Uqcr10
66594	1	0.000966898	ENSMUSG00000020163	Uqcr11
67530	1	0.000966898	ENSMUSG00000021520	Uqcrb
22273	1	0.000966898	ENSMUSG00000025651	Uqcrc1
67003	1	0.000966898	ENSMUSG00000030884	Uqcrc2
66694	1	0.000966898	ENSMUSG00000038462	Uqcrfs1
66576	1	0.000361001	ENSMUSG00000063882	Uqcrh
22272	1	0.000966898	ENSMUSG00000044894	Uqcrq
22275	1	0.000749322	ENSMUSG00000028684	Urod
22276	1	0.000379539	ENSMUSG00000030979	Uros
22305	1	0.000524915	ENSMUSG00000066828	Vmn2r37
22361	1	0.000966898	ENSMUSG00000037440	Vnn1
26464	1	0.000391247	ENSMUSG00000020010	Vnn3
216560	1	0.000755176	ENSMUSG00000020319	Wdpcp
218460	1	0.00111423	ENSMUSG00000042015	Wdr41
22436	1	0.00106642	ENSMUSG00000024066	Xdh
67184	1	0.00112691	ENSMUSG00000048967	Yjefn3
70008	2	0.000441007	ENSMUSG00000015405	Ace2
109900	2	2.4392e-05	ENSMUSG00000025533	Asl
12035	2	9.85436e-05	ENSMUSG00000030268	Bcat1
12116	2	2.53677e-05	ENSMUSG00000074768	Bhmt
64918	2	2.53677e-05	ENSMUSG00000042118	Bhmt2
67092	2	6.24435e-05	ENSMUSG00000027199	Gatm
14598	2	5.4638e-05	ENSMUSG00000006345	Ggt1
12116	2	2.53677e-05	ENSMUSG00000069324	Gm5096
14863	2	9.75679e-07	ENSMUSG00000040562	Gstm2
102860	2	0.000196112	NA	NA
105360	2	0.000384418	NA	NA
105730	2	0.000529794	NA	NA
109340	2	0.00025075	NA	NA
110180	2	3.51245e-05	NA	NA
110890	2	0.000210747	NA	NA
114300	2	0.000274166	NA	NA
114480	2	0.000205868	NA	NA
114860	2	3.51245e-05	NA	NA
142680	2	0.000384418	NA	NA
209840	2	0.00120692	NA	NA
214110	2	0.000318071	NA	NA
215110	2	0.000119033	NA	NA
218760	2	0.00025075	NA	NA
230610	2	0.00025075	NA	NA
232160	2	0.000293679	NA	NA
232330	2	0.000205868	NA	NA
233840	2	0.000201966	NA	NA
237830	2	0.00020099	NA	NA
238380	2	0.000259531	NA	NA
240330	2	0.000219528	NA	NA
241610	2	0.00025075	NA	NA
243620	2	0.000205868	NA	NA
243760	2	0.000216601	NA	NA
246790	2	0.00025075	NA	NA
269350	2	0.00025075	NA	NA
319850	2	0.000384418	NA	NA
330840	2	0.00150938	NA	NA
434200	2	0.000253677	NA	NA
19210	2	4.48812e-05	ENSMUSG00000021518	Ptdss1
27388	2	3.70758e-05	ENSMUSG00000025495	Ptdss2
114640	2	0.000209771	ENSMUSG00000038300	Pth2
20495	2	0.000349293	ENSMUSG00000027202	Slc12a1
20496	2	0.000349293	ENSMUSG00000024597	Slc12a2
20497	2	0.000241968	ENSMUSG00000031766	Slc12a3
55961	2	0.000217576	ENSMUSG00000029700	Slc13a1
20500	2	0.000217576	ENSMUSG00000001095	Slc13a2
72472	2	6.92732e-05	ENSMUSG00000019838	Slc16a10
20504	2	0.000384418	ENSMUSG00000021335	Slc17a1
55963	2	0.000447837	ENSMUSG00000020142	Slc1a4
20514	2	0.000399053	ENSMUSG00000001918	Slc1a5
20515	2	0.000384418	ENSMUSG00000027397	Slc20a1
20516	2	0.000384418	ENSMUSG00000037656	Slc20a2
20520	2	0.000271239	ENSMUSG00000018900	Slc22a5
76376	2	0.000318071	ENSMUSG00000037996	Slc24a2
94249	2	0.000259531	ENSMUSG00000063873	Slc24a3
57279	2	0.000581505	ENSMUSG00000032602	Slc25a20
26457	2	0.000217576	ENSMUSG00000031808	Slc27a1
26568	2	0.000204893	ENSMUSG00000027932	Slc27a3
63959	2	8.19571e-05	ENSMUSG00000023942	Slc29a1
13340	2	9.95193e-05	ENSMUSG00000024891	Slc29a2
20505	2	0.000384418	ENSMUSG00000021490	Slc34a1
20531	2	0.000384418	ENSMUSG00000029188	Slc34a2
67760	2	0.000552234	ENSMUSG00000022462	Slc38a2
69354	2	0.000551259	ENSMUSG00000022464	Slc38a4
20532	2	0.000506378	ENSMUSG00000024131	Slc3a1
17254	2	0.00163134	ENSMUSG00000010095	Slc3a2
72401	2	0.000110252	ENSMUSG00000027075	Slc43a1
54403	2	0.00025075	ENSMUSG00000060961	Slc4a4
20537	2	0.00020099	ENSMUSG00000011034	Slc5a1
53881	2	0.000201966	ENSMUSG00000089774	Slc5a3
63993	2	0.000202941	ENSMUSG00000023945	Slc5a7
14411	2	0.00020782	ENSMUSG00000030109	Slc6a12
14412	2	0.000205868	ENSMUSG00000030108	Slc6a13
56774	2	0.000550283	ENSMUSG00000031089	Slc6a14
74338	2	0.000441007	ENSMUSG00000021565	Slc6a19
20538	2	0.000222455	ENSMUSG00000055368	Slc6a2
102680	2	0.000285874	ENSMUSG00000036814	Slc6a20a
13162	2	0.000222455	ENSMUSG00000021609	Slc6a3
15567	2	0.000248798	ENSMUSG00000020838	Slc6a4
21366	2	0.000277093	ENSMUSG00000030096	Slc6a6
14664	2	0.000285874	ENSMUSG00000028542	Slc6a9
11987	2	0.000407834	ENSMUSG00000041313	Slc7a1
53896	2	0.000232212	ENSMUSG00000030495	Slc7a10
11988	2	0.000385393	ENSMUSG00000031596	Slc7a2
11989	2	0.000385393	ENSMUSG00000031297	Slc7a3
20539	2	0.000773714	ENSMUSG00000040010	Slc7a5
20540	2	0.00123033	ENSMUSG00000000958	Slc7a7
50934	2	7.51273e-05	ENSMUSG00000022180	Slc7a8
30962	2	0.000958117	ENSMUSG00000030492	Slc7a9
20541	2	0.000210747	ENSMUSG00000054640	Slc8a1
71776	2	6.14678e-05	ENSMUSG00000017713	Tha1
57394	2	0.000601994	ENSMUSG00000015401	Tmem27
218100	2	0.000384418	ENSMUSG00000046351	Zfp322a
80908	3	0.000210747	ENSMUSG00000015787	Abo
26879	3	0.000193184	ENSMUSG00000043300	B3galnt1
54218	3	0.000192209	ENSMUSG00000067370	B3galt4
93961	3	0.000188306	ENSMUSG00000074892	B3galt5
76898	3	0.00018733	ENSMUSG00000045994	B3gat1
72727	3	0.00018733	ENSMUSG00000071649	B3gat3
53625	3	0.000542478	ENSMUSG00000051650	B3gnt2
72297	3	0.00058931	ENSMUSG00000031803	B3gnt3
14421	3	0.000203917	ENSMUSG00000006731	B4galnt1
14595	3	0.000500523	ENSMUSG00000028413	B4galt1
53418	3	0.000500523	ENSMUSG00000028541	B4galt2
57370	3	0.000495645	ENSMUSG00000052423	B4galt3
56336	3	0.000495645	ENSMUSG00000017929	B4galt5
56386	3	0.000185379	ENSMUSG00000056124	B4galt6
108100	3	0.000313193	ENSMUSG00000025372	Baiap2
94192	3	0.000201966	ENSMUSG00000042460	C1galt1
231600	3	0.000215625	ENSMUSG00000014668	Chfr
74241	3	0.000278069	ENSMUSG00000032997	Chpf
100910	3	0.000219528	ENSMUSG00000038181	Chpf2
76969	3	0.000199039	ENSMUSG00000027221	Chst1
58250	3	0.00020782	ENSMUSG00000034612	Chst11
59031	3	0.00020782	ENSMUSG00000036599	Chst12
71797	3	0.00020782	ENSMUSG00000056643	Chst13
72136	3	0.00020782	ENSMUSG00000074916	Chst14
54371	3	0.000176598	ENSMUSG00000033350	Chst2
53374	3	0.000217576	ENSMUSG00000057337	Chst3
26887	3	0.000381491	ENSMUSG00000035930	Chst4
56773	3	0.000381491	ENSMUSG00000031952	Chst5
60322	3	0.000215625	ENSMUSG00000037347	Chst7
78923	3	0.000278069	ENSMUSG00000058152	Chsy3
78752	3	0.000279044	ENSMUSG00000042042	Csgalnact2
67464	3	0.000184403	ENSMUSG00000095463	Entpd4
14042	3	0.000238066	ENSMUSG00000061731	Ext1
14043	3	0.000238066	ENSMUSG00000027198	Ext2
56219	3	0.000226358	ENSMUSG00000028838	Extl1
58193	3	0.00020782	ENSMUSG00000027963	Extl2
54616	3	0.000235139	ENSMUSG00000021978	Extl3
108900	3	0.000531745	ENSMUSG00000055184	Fam72a
14343	3	0.000131717	ENSMUSG00000008461	Fut1
53618	3	0.000120984	ENSMUSG00000021065	Fut8
14348	3	0.00012879	ENSMUSG00000055373	Fut9
14423	3	0.000215625	ENSMUSG00000000420	Galnt1
231050	3	0.000215625	ENSMUSG00000038072	Galnt11
71685	3	0.000215625	ENSMUSG00000024064	Galnt14
78754	3	0.000215625	ENSMUSG00000021903	Galnt15
14425	3	0.000215625	ENSMUSG00000026994	Galnt3
14426	3	0.000215625	ENSMUSG00000090035	Galnt4
108150	3	0.000622483	ENSMUSG00000031608	Galnt7
14537	3	0.000214649	ENSMUSG00000038843	Gcnt1
14538	3	0.000204893	ENSMUSG00000021360	Gcnt2
72077	3	0.000203917	ENSMUSG00000032226	Gcnt3
93683	3	4.8784e-06	ENSMUSG00000032252	Glce
67464	3	0.000184403	ENSMUSG00000022066	Gm21685
23908	3	0.000165865	ENSMUSG00000040151	Hs2st1
15476	3	0.000169768	ENSMUSG00000051022	Hs3st1
15478	3	0.000169768	ENSMUSG00000047759	Hs3st3a1
54710	3	0.000169768	ENSMUSG00000070407	Hs3st3b1
50785	3	0.000169768	ENSMUSG00000045216	Hs6st1
50786	3	0.000169768	ENSMUSG00000062184	Hs6st2
50787	3	0.000169768	ENSMUSG00000053465	Hs6st3
16770	3	0.000188306	ENSMUSG00000022991	Lalba
17308	3	0.000203917	ENSMUSG00000020346	Mgat1
17309	3	0.000202941	ENSMUSG00000042428	Mgat3
103530	3	0.000204893	NA	NA
107900	3	0.00020099	NA	NA
195650	3	0.000169768	NA	NA
207840	3	0.000215625	NA	NA
210000	3	0.000531745	NA	NA
217660	3	0.000204893	NA	NA
218270	3	0.000184403	NA	NA
218480	3	0.000205868	NA	NA
225740	3	0.000153182	NA	NA
227670	3	0.000191233	NA	NA
230140	3	0.000215625	NA	NA
231730	3	0.000531745	NA	NA
234360	3	0.000279044	NA	NA
239560	3	0.000189282	NA	NA
241390	3	0.000215625	NA	NA
269940	3	0.000278069	NA	NA
271790	3	0.000215625	NA	NA
272410	3	0.000215625	NA	NA
280640	3	0.00018733	NA	NA
319420	3	0.000174647	NA	NA
333420	3	0.000205868	NA	NA
338360	3	0.000177574	NA	NA
628780	3	0.000177574	NA	NA
15531	3	0.00018733	ENSMUSG00000054008	Ndst1
17423	3	0.00018733	ENSMUSG00000039308	Ndst2
83398	3	0.00018733	ENSMUSG00000027977	Ndst3
64580	3	0.00018733	ENSMUSG00000027971	Ndst4
328780	3	0.000169768	ENSMUSG00000056399	Prss34
24060	3	4.48812e-05	ENSMUSG00000028293	Slc35a1
22232	3	5.1711e-05	ENSMUSG00000031156	Slc35a2
73836	3	3.70758e-05	ENSMUSG00000037089	Slc35b2
58246	3	1.75622e-05	ENSMUSG00000018999	Slc35b4
70484	3	5.95164e-05	ENSMUSG00000033114	Slc35d2
58994	3	0.000176598	ENSMUSG00000031906	Smpd3
20442	3	0.000163914	ENSMUSG00000013846	St3gal1
20444	3	0.000176598	ENSMUSG00000031749	St3gal2
20441	3	0.000147328	ENSMUSG00000028538	St3gal3
20443	3	0.000160011	ENSMUSG00000032038	St3gal4
20454	3	0.000141473	ENSMUSG00000056091	St3gal5
54613	3	0.000146352	ENSMUSG00000022747	St3gal6
20440	3	0.000140498	ENSMUSG00000022885	St6gal1
20445	3	0.000152206	ENSMUSG00000009588	St6galnac1
20446	3	0.000145376	ENSMUSG00000057286	St6galnac2
20447	3	0.000143425	ENSMUSG00000052544	St6galnac3
26938	3	0.000143425	ENSMUSG00000039037	St6galnac5
50935	3	0.000147328	ENSMUSG00000026811	St6galnac6
20449	3	0.000142449	ENSMUSG00000030283	St8sia1
67883	3	0.000118057	ENSMUSG00000057363	Uxs1
83702	4	8.87868e-05	ENSMUSG00000021210	Akr1c6
223770	4	9.75679e-05	ENSMUSG00000022387	Brd1
12642	4	0.00019416	ENSMUSG00000050370	Ch25h
68018	4	8.78111e-06	ENSMUSG00000021669	Col4a3bp
13074	4	0.000231236	ENSMUSG00000003555	Cyp17a1
13075	4	0.000141473	ENSMUSG00000032274	Cyp19a1
13078	4	0.000192209	ENSMUSG00000024087	Cyp1b1
13079	4	0.000193184	ENSMUSG00000024365	Cyp21a1
56050	4	0.000190257	ENSMUSG00000023963	Cyp39a1
13113	4	0.000195136	ENSMUSG00000029727	Cyp3a13
13116	4	0.00019416	ENSMUSG00000021259	Cyp46a1
64385	4	0.000189282	ENSMUSG00000024292	Cyp4f14
13122	4	0.00019416	ENSMUSG00000028240	Cyp7a1
13123	4	0.000190257	ENSMUSG00000039519	Cyp7b1
13135	4	8.87868e-05	ENSMUSG00000022174	Dad1
13200	4	8.87868e-05	ENSMUSG00000028757	Ddost
234130	4	4.97596e-05	ENSMUSG00000031535	Dkk4
57170	4	0.000131717	ENSMUSG00000026856	Dolpp1
13595	4	1.26838e-05	ENSMUSG00000031168	Ebp
93747	4	0.000327828	ENSMUSG00000025465	Echs1
14137	4	0.000149279	ENSMUSG00000021273	Fdft1
14377	4	0.000118057	ENSMUSG00000078650	G6pc
14378	4	0.000118057	ENSMUSG00000005232	G6pc2
68401	4	0.000118057	ENSMUSG00000034793	G6pc3
23887	4	3.51245e-05	ENSMUSG00000006344	Ggt5
15483	4	0.000140498	ENSMUSG00000016194	Hsd11b1
15484	4	8.39084e-05	ENSMUSG00000031891	Hsd11b2
15486	4	9.95193e-05	ENSMUSG00000031844	Hsd17b2
15487	4	0.000150255	ENSMUSG00000033122	Hsd17b3
15490	4	0.000200014	ENSMUSG00000026675	Hsd17b7
15492	4	0.000202941	ENSMUSG00000027871	Hsd3b1
16987	4	1.95136e-06	ENSMUSG00000033105	Lss
57377	4	3.90272e-05	ENSMUSG00000030036	Mogs
66234	4	0.000212698	ENSMUSG00000031604	Msmo1
100200	4	0.000190257	NA	NA
101500	4	0.000156109	NA	NA
103960	4	8.87868e-05	NA	NA
208620	4	9.75679e-05	NA	NA
217120	4	7.41516e-05	NA	NA
230800	4	0.000105373	NA	NA
233780	4	7.41516e-05	NA	NA
235290	4	0.00020099	NA	NA
239830	4	0.000133668	NA	NA
241060	4	0.000110252	NA	NA
320440	4	9.17138e-05	NA	NA
380960	4	9.95193e-05	NA	NA
381900	4	9.36652e-05	NA	NA
18194	4	0.000177574	ENSMUSG00000031349	Nsdhl
55981	4	0.0001083	ENSMUSG00000079469	Pigb
67556	4	0.000101471	ENSMUSG00000050229	Pigm
72084	4	0.000101471	ENSMUSG00000023791	Pigx
20014	4	8.87868e-05	ENSMUSG00000027642	Rpn2
81535	4	3.90272e-05	ENSMUSG00000021054	Sgpp1
20775	4	0.000192209	ENSMUSG00000022351	Sqle
78925	4	0.000154157	ENSMUSG00000021594	Srd5a1
94224	4	0.000154157	ENSMUSG00000038541	Srd5a2
73166	4	0.00014684	ENSMUSG00000024799	Tm7sf2
22234	4	7.41516e-05	ENSMUSG00000028381	Ugcg
11423	5	0.000165865	ENSMUSG00000023328	Ache
11722	5	0.000106349	ENSMUSG00000074264	Amy1
76025	5	0.000199039	ENSMUSG00000025575	Cant1
12494	5	0.000161963	ENSMUSG00000029084	Cd38
12799	5	0.000160987	ENSMUSG00000006782	Cnp
12870	5	0.000174647	ENSMUSG00000003617	Cp
73649	5	0.000112203	ENSMUSG00000027015	Cybrd1
12496	5	0.000201966	ENSMUSG00000015085	Entpd2
12499	5	0.000201966	ENSMUSG00000021236	Entpd5
12497	5	0.000201966	ENSMUSG00000033068	Entpd6
14319	5	0.000174647	ENSMUSG00000024661	Fth1
67634	5	0.000174647	ENSMUSG00000024510	Ftmt
66848	5	6.24435e-05	ENSMUSG00000019810	Fuca2
14590	5	7.70787e-05	ENSMUSG00000073987	Ggh
14778	5	6.92732e-05	ENSMUSG00000018339	Gpx3
75512	5	6.92732e-05	ENSMUSG00000004341	Gpx6
12807	5	0.000174647	ENSMUSG00000027615	Hps3
16816	5	1.75622e-05	ENSMUSG00000035237	Lcat
16889	5	0.000163914	ENSMUSG00000024781	Lipa
15450	5	0.000175622	ENSMUSG00000032207	Lipc
67717	5	0.000175622	ENSMUSG00000024768	Lipf
16891	5	0.000175622	ENSMUSG00000053846	Lipg
109960	5	9.75679e-05	NA	NA
232710	5	9.56166e-05	NA	NA
237620	5	0.000167817	NA	NA
667300	5	9.75679e-05	NA	NA
52633	5	0.000279044	ENSMUSG00000022751	Nit2
23959	5	0.000120009	ENSMUSG00000032420	Nt5e
26565	5	0.000182452	ENSMUSG00000022683	Pla2g10
66350	5	0.000182452	ENSMUSG00000027999	Pla2g12a
18778	5	0.000182452	ENSMUSG00000029522	Pla2g1b
18782	5	0.000182452	ENSMUSG00000041202	Pla2g2d
26970	5	0.000182452	ENSMUSG00000028751	Pla2g2e
26971	5	0.000182452	ENSMUSG00000028749	Pla2g2f
18784	5	0.000182452	ENSMUSG00000041193	Pla2g5
27226	5	0.000161963	ENSMUSG00000023913	Pla2g7
69060	5	0.000175622	ENSMUSG00000046008	Pnlip
18946	5	0.000175622	ENSMUSG00000042179	Pnliprp1
18947	5	0.000175622	ENSMUSG00000025091	Pnliprp2
57782	5	8.78111e-06	ENSMUSG00000061898	Rbak
19895	5	9.75679e-05	ENSMUSG00000053604	Rpia
53945	5	5.85408e-06	ENSMUSG00000025993	Slc40a1
20657	5	0.000105373	ENSMUSG00000072941	Sod3
58866	5	8.68355e-05	ENSMUSG00000032098	Treh
11430	6	0.000291728	ENSMUSG00000020777	Acox1
93732	6	4.29299e-05	ENSMUSG00000021751	Acox2
80911	6	0.000124887	ENSMUSG00000029098	Acox3
17117	6	4.39056e-05	ENSMUSG00000022244	Amacr
12359	6	0.000147328	ENSMUSG00000027187	Cat
12908	6	0.000130741	ENSMUSG00000026853	Crat
74114	6	3.41488e-05	ENSMUSG00000003623	Crot
13142	6	4.97596e-05	ENSMUSG00000042096	Dao
26378	6	4.39056e-05	ENSMUSG00000036775	Decr2
51798	6	1.95136e-06	ENSMUSG00000053898	Ech1
23986	6	8.29327e-05	ENSMUSG00000021417	Eci2
74147	6	0.00114837	ENSMUSG00000022853	Ehhadh
56794	6	6.14678e-05	ENSMUSG00000021884	Hacl1
15112	6	0.000211722	ENSMUSG00000027261	Hao1
56185	6	0.000211722	ENSMUSG00000027870	Hao2
76429	6	4.09785e-05	ENSMUSG00000030946	Lhpp
113870	6	0.000297582	NA	NA
216740	6	2.63433e-05	NA	NA
16922	6	2.82947e-05	ENSMUSG00000026664	Phyh
19193	6	5.1711e-05	ENSMUSG00000017453	Pipox
20280	6	7.31759e-05	ENSMUSG00000028603	Scp2
11432	7	2.14649e-05	ENSMUSG00000002103	Acp2
11593	7	2.24406e-05	ENSMUSG00000031521	Aga
11883	7	6.24435e-05	ENSMUSG00000022620	Arsa
11881	7	8.00057e-05	ENSMUSG00000042082	Arsb
11886	7	2.34163e-05	ENSMUSG00000031591	Asah1
19025	7	0.000351245	ENSMUSG00000017760	Ctsa
71665	7	2.24406e-05	ENSMUSG00000028673	Fuca1
14420	7	3.02461e-05	ENSMUSG00000021003	Galc
50917	7	0.000351245	ENSMUSG00000015027	Galns
11605	7	2.7319e-05	ENSMUSG00000031266	Gla
12091	7	0.000770787	ENSMUSG00000045594	Glb1
75612	7	0.000169768	ENSMUSG00000034707	Gns
15211	7	0.00034539	ENSMUSG00000025232	Hexa
15212	7	0.00034539	ENSMUSG00000021665	Hexb
17159	7	2.4392e-05	ENSMUSG00000005142	Man2b1
17523	7	2.04893e-05	ENSMUSG00000009350	Mpo
110010	7	4.97596e-05	NA	NA
110170	7	2.53677e-05	NA	NA
17939	7	3.21974e-05	ENSMUSG00000022453	Naga
18010	7	0.000351245	ENSMUSG00000007038	Neu1
18669	8	6.14678e-05	ENSMUSG00000028970	Abcb1b
320720	8	0.000129765	ENSMUSG00000027086	Fastkd1
231580	8	8.78111e-05	ENSMUSG00000062234	Gak
101490	8	6.82975e-05	ENSMUSG00000042105	Inpp5f
268510	8	8.09814e-05	ENSMUSG00000043857	Mgat5b
107720	8	0.000156109	NA	NA
108120	8	7.02489e-05	NA	NA
171430	8	0.00015123	NA	NA
216220	8	4.8784e-06	NA	NA
224660	8	0.000129765	NA	NA
240220	8	0.000106349	NA	NA
20498	8	0.000156109	ENSMUSG00000017765	Slc12a4
57138	8	9.75679e-05	ENSMUSG00000017740	Slc12a5
20499	8	0.000156109	ENSMUSG00000017756	Slc12a7
20502	8	1.56109e-05	ENSMUSG00000033965	Slc16a2
13521	8	0.000136595	ENSMUSG00000034320	Slc26a2
13487	8	0.000136595	ENSMUSG00000001225	Slc26a3
23985	8	0.000120984	ENSMUSG00000020651	Slc26a4
208890	8	0.000129765	ENSMUSG00000040569	Slc26a7
20533	8	0.000106349	ENSMUSG00000006574	Slc4a1
20535	8	0.000106349	ENSMUSG00000028962	Slc4a2
20536	8	0.000106349	ENSMUSG00000006576	Slc4a3
28250	8	7.02489e-05	ENSMUSG00000030237	Slco1a4
28253	8	9.56166e-05	ENSMUSG00000030236	Slco1b2
58807	8	8.29327e-05	ENSMUSG00000030235	Slco1c1
24059	8	7.51273e-05	ENSMUSG00000032548	Slco2a1
71985	9	0.000102446	ENSMUSG00000029456	Acad10
71985	9	0.000102446	ENSMUSG00000042647	Acad12
66948	9	0.000112203	ENSMUSG00000031969	Acad8
66885	9	0.000113179	ENSMUSG00000030861	Acadsb
74129	9	0.000125863	ENSMUSG00000042102	Dmgdh
192170	9	6.82975e-05	ENSMUSG00000025580	Eif4a3
14571	9	5.4638e-05	ENSMUSG00000026827	Gpd2
56357	9	8.78111e-05	ENSMUSG00000027332	Ivd
102630	9	0.000102446	NA	NA
110830	9	4.68326e-05	NA	NA
110840	9	4.68326e-05	NA	NA
218860	9	4.39056e-05	NA	NA
229210	9	0.000102446	NA	NA
66945	9	6.73219e-05	ENSMUSG00000021577	Sdha
67680	9	6.73219e-05	ENSMUSG00000009863	Sdhb
66052	9	6.73219e-05	ENSMUSG00000058076	Sdhc
66925	9	6.73219e-05	ENSMUSG00000000171	Sdhd
13649	10	6.43948e-05	ENSMUSG00000020122	Egfr
54326	10	6.43948e-05	ENSMUSG00000021364	Elovl2
68801	10	6.43948e-05	ENSMUSG00000032349	Elovl5
77805	10	6.43948e-05	ENSMUSG00000024293	Esco1
71988	10	6.43948e-05	ENSMUSG00000022034	Esco2
67216	10	6.43948e-05	ENSMUSG00000020646	Mboat2
77582	10	6.43948e-05	ENSMUSG00000035596	Mboat7
109680	10	6.43948e-05	NA	NA
226860	10	6.43948e-05	NA	NA
66826	10	6.43948e-05	ENSMUSG00000009995	Taz
116940	10	6.43948e-05	ENSMUSG00000028233	Tgs1
112420	11	6.04921e-05	NA	NA
231400	11	6.04921e-05	NA	NA
242580	11	2.92704e-05	NA	NA
243080	11	1.36595e-05	NA	NA
394440	11	4.97596e-05	NA	NA
552900	11	6.04921e-05	NA	NA
394430	11	8.29327e-05	ENSMUSG00000090165	Ugt1a10
94284	11	6.04921e-05	ENSMUSG00000054545	Ugt1a6a
94284	11	6.04921e-05	ENSMUSG00000090124	Ugt1a7c
94215	11	6.04921e-05	ENSMUSG00000029268	Ugt2a1
72094	11	6.04921e-05	ENSMUSG00000035780	Ugt2a3
71773	11	1.36595e-05	ENSMUSG00000035836	Ugt2b1
22238	11	6.04921e-05	ENSMUSG00000054630	Ugt2b5
18805	12	0.000476131	ENSMUSG00000027695	Pld1
14731	13	5.4638e-05	ENSMUSG00000022561	Gpaa1
228810	13	5.4638e-05	NA	NA
276850	13	5.4638e-05	NA	NA
329780	13	5.4638e-05	NA	NA
433930	13	4.29299e-05	NA	NA
18701	13	5.1711e-05	ENSMUSG00000024145	Pigf
27392	13	4.39056e-05	ENSMUSG00000056536	Pign
56703	13	3.61001e-05	ENSMUSG00000028454	Pigo
78928	13	4.58569e-05	ENSMUSG00000017721	Pigt
11674	14	4.29299e-05	ENSMUSG00000030695	Aldoa
11676	14	4.29299e-05	ENSMUSG00000017390	Aldoc
230160	14	4.39056e-05	NA	NA
66646	14	7.80543e-06	ENSMUSG00000026005	Rpe
21351	14	4.48812e-05	ENSMUSG00000025503	Taldo1
21881	14	3.21974e-05	ENSMUSG00000021957	Tkt
83553	14	6.04921e-05	ENSMUSG00000031397	Tktl1
74419	14	6.04921e-05	ENSMUSG00000025519	Tktl2
21991	14	1.65865e-05	ENSMUSG00000023456	Tpi1
73724	15	3.90272e-06	ENSMUSG00000033429	Mcee
17850	15	1.46352e-05	ENSMUSG00000023921	Mut
353370	15	8.09814e-05	NA	NA
67041	15	8.09814e-05	ENSMUSG00000022186	Oxct1
64059	15	8.09814e-05	ENSMUSG00000076436	Oxct2a
17155	16	3.80515e-05	ENSMUSG00000003746	Man1a
17156	16	3.80515e-05	ENSMUSG00000008763	Man1a2
17158	16	1.95136e-05	ENSMUSG00000024085	Man2a1
230820	16	3.80515e-05	NA	NA
20517	17	2.24406e-05	ENSMUSG00000023829	Slc22a1
20518	17	7.22003e-05	ENSMUSG00000040966	Slc22a2
20519	17	3.80515e-05	ENSMUSG00000023828	Slc22a3
53332	18	1.65865e-05	ENSMUSG00000015214	Mtmr1
77116	18	1.65865e-05	ENSMUSG00000031918	Mtmr2
433320	18	1.65865e-05	NA	NA
75454	18	1.65865e-05	ENSMUSG00000036504	Phpt1
72198	18	1.65865e-05	ENSMUSG00000016018	Skiv2l2
219140	18	1.65865e-05	ENSMUSG00000021990	Spata13
70047	18	1.65865e-05	ENSMUSG00000013736	Trnt1
79235	19	2.34163e-05	ENSMUSG00000028003	Lrat
19659	19	1.65865e-05	ENSMUSG00000046402	Rbp1
19660	19	1.65865e-05	ENSMUSG00000032454	Rbp2
19662	19	1.65865e-05	ENSMUSG00000024990	Rbp4
20897	19	1.65865e-05	ENSMUSG00000032327	Stra6
104420	20	2.04893e-05	NA	NA
320130	20	2.04893e-05	NA	NA
93835	21	5.85408e-06	ENSMUSG00000021278	Amn
65969	21	9.75679e-06	ENSMUSG00000026726	Cubn
14473	21	3.90272e-06	ENSMUSG00000035540	Gc
14603	21	5.85408e-06	ENSMUSG00000024682	Gif
14725	21	3.90272e-06	ENSMUSG00000027070	Lrp2
14780	22	2.92704e-06	ENSMUSG00000004344	Gpx5
67305	22	2.92704e-06	ENSMUSG00000028597	Gpx7
64008	23	5.85408e-06	ENSMUSG00000032204	Aqp9
108050	23	7.80543e-06	NA	NA
27411	23	7.80543e-06	ENSMUSG00000024552	Slc14a2
17001	24	6.82975e-06	ENSMUSG00000020377	Ltc4s
66447	24	6.82975e-06	ENSMUSG00000026688	Mgst3
211670	24	6.82975e-06	NA	NA
14275	25	6.82975e-06	ENSMUSG00000001827	Folr1
14276	25	5.85408e-06	ENSMUSG00000032725	Folr2
54486	26	4.8784e-06	ENSMUSG00000029919	Hpgds
19215	26	4.8784e-06	ENSMUSG00000015090	Ptgds
319550	27	4.8784e-06	NA	NA
320580	27	4.8784e-06	NA	NA
19223	28	2.92704e-06	ENSMUSG00000017969	Ptgis
21391	28	2.92704e-06	ENSMUSG00000029925	Tbxas1
237640	29	2.92704e-06	NA	NA
20778	29	2.92704e-06	ENSMUSG00000037936	Scarb1
13190	30	1.95136e-06	ENSMUSG00000022129	Dct
22178	30	9.75679e-07	ENSMUSG00000005994	Tyrp1
