# Supplementary material for: Dynamic genome-scale cell-specific metabolic models reveal novel inter-cellular and intra-cellular metabolic communications during ovarian follicle development
Source: BMC Bioinformatics. 2019 Jun 10;20:307. doi: 10.1186/s12859-019-2825-2 (PMC6558917; doi:10.1186/s12859-019-2825-2)
Supplement: Supplementary file 5 — Z-scores for each metabolic pathway using Infomap information for Mice Recon 2 and OvoFol 1. (XLSX 92 kb) [file 12859_2019_2825_MOESM7_ESM.xlsx]

## Sheet: Zscore OvoFol
Subsytems	community	Z-score
transport, extracellular	1	23.7785
keratan sulfate synthesis	1	23.326
bile acid synthesis	1	21.1785
fatty acid oxidation, peroxisome	1	20.7861
fatty acid oxidation	1	18.3978
carnitine shuttle	1	17.958
fatty acid elongation	1	17.1056
folate metabolism	1	14.9093
transport, peroxisomal	1	14.8773
transport, lysosomal	1	13.9673
unassigned	1	13.2009
pyruvate metabolism	1	12.1651
glycolysis/gluconeogenesis	1	11.8853
inositol phosphate metabolism	1	11.8593
glyoxylate and dicarboxylate metabolism	1	10.6673
ascorbate and aldarate metabolism	1	10.1336
tyrosine metabolism	1	9.77848
purine catabolism	1	9.18659
limonene and pinene degradation	1	9.13637
phenylalanine metabolism	1	8.99302
histidine metabolism	1	8.32967
oxidative phosphorylation	1	7.56699
coa synthesis	1	7.2562
fatty acid metabolism	1	6.79203
pentose phosphate pathway	1	5.98044
cyp metabolism	1	5.65953
fructose and mannose metabolism	1	5.60002
beta-alanine metabolism	1	5.33212
coa catabolism	1	5.11085
pyrimidine synthesis	1	5.08489
vitamin d metabolism	1	4.5064
glycerophospholipid metabolism	1	4.4679
phosphatidylinositol phosphate metabolism	1	4.21639
nad metabolism	1	4.19173
eicosanoid metabolism	1	3.72089
imp synthesis	1	3.64067
arginine and proline metabolism	1	3.59605
pentose and glucuronate interconversions	1	2.58163
vitamin b2 metabolism	1	2.4899
heme degradation	1	2.44235
selenoamino acid metabolism	1	2.28385
o-glycan synthesis	1	2.02983
glutathione metabolism	1	2.02896
vitamin b6 metabolism	1	1.92866
tryptophan metabolism	1	1.73606
fatty acid synthesis	1	1.7213
cholesterol metabolism	1	1.6462
tetrahydrobiopterin metabolism	1	1.27133
nucleotide interconversion	1	1.19276
transport, lumen	1	1.17855
riboflavin metabolism	1	1.15867
thiamine metabolism	1	0.863376
pyrimidine catabolism	1	0.594341
d-alanine metabolism	1	0.558332
biotin metabolism	1	0.423029
starch and sucrose metabolism	1	0.37327
glutamate metabolism	1	0.349596
chondroitin / heparan sulfate synthesis	1	0.340733
propanoate metabolism	1	0.204483
transport, mitochondrial	1	0.0636832
vitamin a metabolism	1	-0.400761
aminosugar metabolism	1	-0.630235
exchange/demand reaction	1	-0.655971
urea cycle/amino group metabolism	1	-0.656483
galactose metabolism	1	-0.673349
squalene and cholesterol synthesis	1	-0.98416
taurine and hypotaurine metabolism	1	-1.24958
sphingolipid metabolism	1	-1.75997
hyaluronan metabolism	1	-1.79369
methionine and cysteine metabolism	1	-1.8792
ros detoxification	1	-1.89111
butanoate metabolism	1	-2.00259
arachidonic acid metabolism	1	-2.02028
transport, endoplasmic reticular	1	-2.20537
transport, golgi apparatus	1	-2.44661
heme synthesis	1	-2.55088
glycosylphosphatidylinositol (gpi)-anchor synthesis	1	-2.78198
alanine and aspartate metabolism	1	-3.19723
steroid metabolism	1	-3.73276
nucleotides	1	-4.32395
salvage pathway	1	-4.63305
lysine metabolism	1	-4.64724
dipeptide degradation	1	-4.83776
glycine, serine, alanine and threonine metabolism	1	-5.65158
n-glycan synthesis	1	-6.59294
triacylglycerol synthesis	1	-7.19586
citric acid cycle	1	-7.55641
fatty acid activation	1	-8.29345
c5-branched dibasic acid metabolism	1	-8.31985
valine, leucine, and isoleucine metabolism	1	-10.5117
transport, extracellular	2	15.9826
tyrosine metabolism	2	1.41248
starch and sucrose metabolism	2	1.0833
transport, lysosomal	2	-0.696601
fatty acid oxidation	2	-1.04945
transport, peroxisomal	2	-1.60347
taurine and hypotaurine metabolism	2	-2.06916
vitamin a metabolism	2	-2.12002
transport, mitochondrial	2	-2.74302
urea cycle/amino group metabolism	2	-2.78842
alanine and aspartate metabolism	2	-3.27565
carnitine shuttle	2	-3.62526
glutathione metabolism	2	-3.82269
glycerophospholipid metabolism	2	-4.05973
valine, leucine, and isoleucine metabolism	2	-4.53511
glycine, serine, alanine and threonine metabolism	2	-5.76085
transport, lumen	2	-6.20308
imp synthesis	3	-1.25579
nucleotide sugar metabolism	3	-2.56256
nucleotides	3	-2.70613
galactose metabolism	3	-3.34122
transport, extracellular	3	-4.78011
transport, golgi apparatus	3	-6.53169
n-glycan synthesis	3	-7.53963
o-glycan synthesis	3	-11.9015
blood group synthesis	3	-14.391
sphingolipid metabolism	3	-16.9205
keratan sulfate synthesis	3	-23.295
chondroitin / heparan sulfate synthesis	3	-26.2295
beta-alanine metabolism	4	-1.6329
tryptophan metabolism	4	-1.65775
transport, extracellular	4	-1.83207
valine, leucine, and isoleucine metabolism	4	-2.3507
eicosanoid metabolism	4	-2.78655
transport, endoplasmic reticular	4	-2.95625
transport, golgi apparatus	4	-3.05768
cyp metabolism	4	-3.13798
fatty acid oxidation	4	-3.81397
phosphatidylinositol phosphate metabolism	4	-3.98861
chondroitin / heparan sulfate synthesis	4	-4.27677
unassigned	4	-4.36844
glycolysis/gluconeogenesis	4	-4.38186
pentose phosphate pathway	4	-4.394
sphingolipid metabolism	4	-5.0523
bile acid synthesis	4	-8.9291
cholesterol metabolism	4	-11.1149
glycosylphosphatidylinositol (gpi)-anchor synthesis	4	-13.4647
n-glycan synthesis	4	-13.5547
steroid metabolism	4	-15.2282
pentose phosphate pathway	5	-1.8702
urea cycle/amino group metabolism	5	-2.07267
ros detoxification	5	-2.57461
galactose metabolism	5	-2.6628
n-glycan degradation	5	-2.74172
keratan sulfate degradation	5	-2.75013
heme synthesis	5	-2.82332
purine catabolism	5	-2.92724
fatty acid metabolism	5	-2.95019
methionine and cysteine metabolism	5	-3.36236
transport, extracellular	5	-3.85923
nad metabolism	5	-3.93776
glutathione metabolism	5	-3.95775
unassigned	5	-5.88853
starch and sucrose metabolism	5	-7.04921
triacylglycerol synthesis	5	-7.28056
glycerophospholipid metabolism	5	-8.21915
folate metabolism	5	-9.09944
nucleotides	5	-10.0905
cholesterol metabolism	6	0.937855
unassigned	6	-0.724986
ros detoxification	6	-2.20566
glycolysis/gluconeogenesis	6	-2.39358
purine catabolism	6	-2.90925
lysine metabolism	6	-3.10411
d-alanine metabolism	6	-3.45915
carnitine shuttle	6	-3.73143
glyoxylate and dicarboxylate metabolism	6	-5.01164
transport, peroxisomal	6	-5.08974
fatty acid metabolism	6	-5.58493
bile acid synthesis	6	-6.68437
fatty acid oxidation, peroxisome	6	-13.0404
fatty acid oxidation	6	-16.8161
galactose metabolism	7	-2.86712
coa catabolism	7	-2.94623
unassigned	7	-2.96363
hyaluronan metabolism	7	-4.59626
sphingolipid metabolism	7	-7.07178
n-glycan degradation	7	-8.35773
chondroitin sulfate degradation	7	-15.6413
keratan sulfate degradation	7	-23.2263
transport, extracellular	8	-19.8488
bile acid synthesis	9	-2.7905
glycolysis/gluconeogenesis	9	-2.96867
urea cycle/amino group metabolism	9	-3.39349
fatty acid oxidation	9	-4.18946
glycine, serine, alanine and threonine metabolism	9	-4.27187
valine, leucine, and isoleucine metabolism	9	-4.79323
citric acid cycle	9	-5.51439
butanoate metabolism	9	-6.03534
propanoate metabolism	9	-6.04649
fatty acid oxidation	10	-9.24705
transport, endoplasmic reticular	11	-3.0916
unassigned	11	-4.04756
steroid metabolism	11	-6.68374
glycerophospholipid metabolism	12	-2.81396
glycosylphosphatidylinositol (gpi)-anchor synthesis	13	-17.4097
galactose metabolism	14	-2.58117
glyoxylate and dicarboxylate metabolism	14	-4.10553
fructose and mannose metabolism	14	-4.17786
glycolysis/gluconeogenesis	14	-4.77239
pentose phosphate pathway	14	-7.21026
valine, leucine, and isoleucine metabolism	15	-5.77069
n-glycan synthesis	16	-18.089
transport, extracellular	17	-7.49718
transport, extracellular	18	-5.50738
vitamin a metabolism	19	-2.9257
transport, lumen	19	-4.14457
glycerophospholipid metabolism	20	-4.62614
transport, lumen	21	-3.67837
transport, extracellular	21	-5.18553
arachidonic acid metabolism	22	-2.86943
exchange/demand reaction	22	-7.65053
urea cycle/amino group metabolism	23	-2.15833
transport, extracellular	23	-2.94598
eicosanoid metabolism	24	-4.60317
transport, extracellular	25	-2.08396
transport, lumen	25	-2.97953
eicosanoid metabolism	26	-2.92606
cholesterol metabolism	27	-2.97549
eicosanoid metabolism	28	-2.91531
transport, lumen	29	-2.92972
tyrosine metabolism	30	-2.97485

## Sheet: Zscore Content-specific models
Subsystems	Community	OPM	OPR	OSC	OSA	OLA	SPM	SPR	SSC	SSA	SLA	CcSA	CcLA	MrSA	MrLA	CcNSN	CcSN
transport, extracellular	2	-8.04141	0.58833	5.83132	5.89857	3.55244	8.30336	20.1265	8.68199	9.22029	-0.438587	-9.36408	-10.2761	-6.96406	-10.3026	-7.38464	-7.75565
keratan sulfate synthesis	3	-6.33581	-3.81986	-3.94613	-4.17802	-4.18082	-8.34095	-7.43065	-7.33466	-6.84105	-7.33078	-3.06494	-3.63995	-4.93195	-5.50395	-3.70216	-3.77197
fatty acid oxidation	6	-5.71576	-5.67179	-5.84693	-6.32022	-6.57273	-9.57371	-9.10866	-8.62555	-8.9436	-8.68278	-4.18274	-4.94223	-4.61913	-3.14294	-3.30767	-3.40025
nucleotides	1	9.40276	0.886526	-1.41788	-2.30677	-1.51016	9.83295	8.34352	18.5854	18.522	9.28931	-0.395386	-3.95109	-3.75004	-4.08782	-3.23589	-3.35222
keratan sulfate degradation	7	-1.59015	-4.13873	-5.25385	-5.52156	-5.69016	-6.23401	-6.52308	-5.97163	-5.1669	-6.2893	2.41845	-2.56755	-4.12547	-4.60598	-3.1878	-3.23306
transport, extracellular	1	8.58539	2.95397	1.26466	1.73538	2.43427	-2.68399	-3.09137	-1.91868	-2.09294	-2.6354	15.4409	2.44073	15.16	-0.82431	-2.91484	-2.71252
chondroitin / heparan sulfate synthesis	3	-4.46969	-4.46257	-4.6677	-4.26787	-4.22239	-5.29594	-5.65103	-5.0519	-3.1791	-3.80007	-2.95133	-3.84934	0.764293	-3.86265	-2.62228	-2.85958
fatty acid oxidation, peroxisome	6	-4.48387	-4.29171	-4.44985	-4.54429	-4.85362	-7.38673	-6.53608	-6.63432	-6.91192	-6.67143	-3.23353	-3.84836	-3.49633	-2.10892	-2.57423	-2.60651
inositol phosphate metabolism	1	-3.3518	0.778787	1.57376	2.49702	2.32148	0.359334	-0.891205	-1.23917	-2.04162	-2.57745	-1.36427	1.39672	-2.59378	-2.19002	-2.3039	-1.83337
carnitine shuttle	1	-0.602381	-2.77529	-3.91104	-4.00431	-2.74393	-6.56771	-5.96068	-5.99277	-5.85079	-5.95145	7.02143	14.9647	-3.10327	11.8354	-2.27197	-2.32712
oxidative phosphorylation	1	12.8628	3.55018	2.15136	1.75408	2.33278	8.73312	1.96263	4.42602	5.74113	2.99706	-0.756966	-0.787316	-3.03608	-3.23558	-2.23752	-2.5419
transport, lumen	2	-1.3985	1.99269	4.0623	4.86154	4.00742	-0.971185	1.07163	-0.670643	-0.51041	-1.72917	-2.58888	-2.13327	-2.40371	-2.53897	-2.11053	-2.21266
transport, mitochondrial	1	-3.60805	-0.857005	-1.63037	-2.37394	-2.31518	1.80345	3.5405	3.02682	3.31799	2.62096	6.94685	9.63321	4.76412	7.37007	-1.98948	-1.95998
chondroitin sulfate degradation	7	-0.850042	-2.62746	-3.26954	-3.53412	-3.72322	-3.90113	-4.25542	-3.64052	-3.13825	-3.75632	0.316969	-1.88142	-2.68894	-2.85047	-1.85877	-1.99361
keratan sulfate synthesis	1	-3.01179	-2.9266	-2.93636	-3.16281	-3.13061	-5.07683	-4.61578	-4.63494	-4.43579	-4.62612	-1.39586	-2.57347	-2.2469	-2.49445	-1.76418	-1.76892
folate metabolism	1	-1.64452	-1.87579	-1.78288	-1.52843	-1.72824	30.5623	52.9408	34.9571	23.9526	16.7869	-2.17142	-2.39233	-2.22296	-2.45467	-1.70798	-1.7585
sphingolipid metabolism	3	-2.7975	-2.68655	-2.80827	-3.04901	-2.86451	-4.53552	-4.32114	-3.99419	-4.03114	-4.23889	-1.92122	-2.42713	-1.89194	-2.27163	-1.64968	-1.75538
glycine, serine, alanine and threonine metabolism	1	-0.765338	0.78858	2.23381	2.13263	1.59418	-2.98718	-1.97329	-2.04412	-2.33148	-1.96189	-1.91461	-2.27009	1.77846	1.30661	-1.53446	-1.60219
valine, leucine, and isoleucine metabolism	1	-2.10487	-2.1724	-2.34367	-2.60256	-2.76641	-2.74599	-3.07225	-2.70804	-2.47327	-2.05732	-1.64778	-2.26699	-1.9369	-2.14983	-1.50918	-1.50269
fatty acid oxidation, peroxisome	1	38.4522	8.79013	9.61489	14.5016	17.8488	-4.16386	-3.91288	-3.83459	-3.7862	-3.59705	-1.77977	-2.07113	-2.0199	-2.23037	-1.48525	-1.49772
blood group synthesis	3	-2.53849	-2.43646	-2.44612	-2.52646	-2.67758	-3.80215	-3.59734	-3.54206	-3.70955	-3.65148	-1.11026	-2.10342	-1.71668	-2.0516	-1.42656	-1.51606
transport, extracellular	8	-2.66841	-2.48191	-2.41151	-2.83624	-2.93045	-4.23054	-3.83623	-3.94736	-3.90341	-4.03721	-1.87115	-2.08971	-2.09671	-2.02752	-1.41665	-1.47809
n-glycan synthesis	16	-2.35202	-2.33196	-2.43416	-2.54877	-2.59372	-3.87565	-3.83399	-3.76455	-3.65303	-3.68511	-1.80693	-2.07464	-1.72149	-2.12157	-1.4088	-1.53829
steroid metabolism	4	-2.41902	-2.25624	-2.39662	-2.367	-2.50031	-3.47529	-2.26829	-0.971007	-1.48784	3.62399	-1.37704	-0.855593	-0.317484	1.81489	-1.34941	-1.43972
glycosylphosphatidylinositol (gpi)-anchor synthesis	13	-2.26404	-2.24509	-2.29401	-2.4175	-2.49142	-3.54842	-3.28468	-3.31522	-3.30587	-3.34653	-1.71802	-1.90993	-1.77591	-1.9562	-1.31933	-1.41302
transport, lumen	1	-1.48007	1.45313	0.727082	1.31545	2.10308	-3.08172	-2.67325	-2.83122	-3.06971	-2.80953	-1.62406	-1.99659	-1.67183	-2.01926	-1.31623	-1.37407
transport, lysosomal	1	0.947572	-1.11894	-1.32856	-1.05726	-0.416656	10.0881	6.97668	7.33008	6.69585	8.86402	-1.67449	1.12918	-1.77751	-1.35879	-1.30902	-1.31749
tryptophan metabolism	1	-1.66638	-2.01049	-2.00984	-1.68604	-1.86492	-2.75388	-2.95854	-2.91623	-2.81792	-2.92208	-1.80779	-1.41539	3.78432	4.00199	-1.24327	-1.44536
bile acid synthesis	1	1.80096	4.76487	3.2056	3.64667	4.23013	-1.18897	-2.34324	-2.20239	-2.0581	-1.01338	8.5032	8.21845	6.97733	6.00539	-1.18521	-1.07436
glutamate metabolism	1	-0.343555	0.287089	0.648833	-0.55241	-1.65847	-3.25397	-3.02845	-2.94536	-2.99518	-3.09383	-1.42268	-1.63295	-1.57926	-1.66479	-1.18184	-1.23244
vitamin a metabolism	1	-1.64568	-0.905298	-0.115382	-0.328796	-0.0615473	-3.53215	-3.20642	-3.27434	-3.15523	-3.16444	-1.63078	-1.79039	-1.71084	-1.73218	-1.17711	-1.25255
fatty acid activation	1	-2.03691	-0.34781	-0.538834	-0.643718	-0.176802	-1.04264	-2.18463	-2.00625	-4.05595	-1.1162	-1.52334	-2.79809	6.02409	-2.5974	-1.16437	-0.0165398
fructose and mannose metabolism	1	-0.701893	0.768294	2.7351	1.98104	1.43615	-2.23466	-2.63443	-1.71369	-1.55498	-0.143191	0.116179	1.84107	1.29916	0.41257	-1.12695	-1.19062
n-glycan synthesis	4	-1.90475	-1.96716	-1.95132	-2.00119	-2.05192	-1.69074	-1.73952	-1.36403	-1.21445	-1.51451	-1.45962	-1.61153	-1.57372	-1.64785	-1.12529	-1.16307
methionine and cysteine metabolism	1	-0.767372	-1.44797	-1.33948	-1.30863	-1.13514	-2.83189	-2.71774	-2.61047	-2.56262	-2.62323	-1.42825	-1.56607	-1.4795	6.41451	-1.11083	-1.16049
glycosylphosphatidylinositol (gpi)-anchor synthesis	4	-1.88759	-1.76622	-2.00753	-1.99121	-2.09174	-3.13647	-2.93394	-2.75272	-2.8665	-2.89868	-1.42335	-1.62576	-1.53933	-1.56085	-1.1083	-1.13273
starch and sucrose metabolism	1	-1.06283	2.08346	1.76732	1.80312	2.71347	-2.45065	-2.60009	-2.53388	-2.68595	-2.75484	-1.33236	0.365741	-1.45571	-0.53131	-1.10193	-1.15757
aminosugar metabolism	1	-1.27583	-1.80924	-1.89176	-1.90269	-2.25376	-2.28565	-2.2209	-1.87571	-1.95156	-1.17233	0.177189	0.733116	-1.52265	-0.960312	-1.10168	-1.20225
nad metabolism	1	-1.84453	-1.96573	-1.93425	-2.02001	-1.35006	-1.87535	-2.41942	-2.27432	-2.48	-2.61485	-0.0785987	-1.66988	-1.18291	-1.21575	-1.09567	-1.1457
steroid metabolism	1	-1.99346	-1.97606	-1.95965	-1.91466	-1.95093	-2.3379	-0.0645687	3.66533	5.69488	3.58668	-1.42493	-1.63103	-1.5888	0.631639	-1.06916	0.536082
glutathione metabolism	1	-0.838973	0.387223	0.0938126	0.0447198	-0.119606	8.05372	4.21685	5.41132	5.65154	7.57961	-1.23722	-1.47685	-1.36372	-1.47687	-1.02822	-1.04696
fatty acid elongation	1	-2.61949	7.5974	7.25588	5.68863	5.21684	6.71584	4.36795	7.55836	6.71925	17.2132	28.4326	38.8311	24.9022	26.9139	-1.02795	-0.783257
n-glycan synthesis	1	-1.66625	-1.5637	-1.65428	-1.56513	-1.86726	-2.5201	-2.41236	-2.4532	-2.5433	-2.34524	-1.16032	-1.41598	-1.23263	-1.33813	-1.02671	-1.01836
transport, peroxisomal	1	-1.82025	-1.71998	-1.75344	-1.79894	-2.00694	-2.89424	-1.27178	-0.750295	-0.339385	-2.56264	5.66125	-1.47231	8.86569	-1.02149	-1.00882	-1.0895
o-glycan synthesis	3	-1.83614	-1.95585	-1.96545	-2.02885	-2.10148	-2.96343	-2.93825	-2.86788	-2.96311	-2.9267	-0.722757	-1.53799	-1.50475	-1.32666	-1.00765	-1.19665
citric acid cycle	1	-0.328595	-0.751611	-0.568003	-0.00885194	0.409298	0.0936655	-1.44764	-0.808426	-0.45776	7.74286	-1.53331	-1.76745	-0.418526	6.32318	-1.00259	-0.992323
sphingolipid metabolism	1	-1.19805	-1.58243	-1.65994	-1.70845	-1.6309	-2.17442	-2.07737	-1.92441	-1.62137	-1.77856	1.04772	-1.44305	1.34642	-1.41118	-0.986327	-1.05359
lysine metabolism	1	-1.43222	-0.0505543	0.599784	1.2807	1.86524	-1.9238	-2.0518	-1.01277	-0.253297	0.329297	-1.25131	-1.42099	1.67577	1.80602	-0.941459	-1.01341
nucleotides	5	-1.53388	-1.36291	-1.41564	-1.65097	-1.72938	-2.61215	-2.4636	-2.4978	-2.45795	-2.38418	-1.20007	-1.21542	-0.554858	-1.29528	-0.936309	-0.981136
n-glycan degradation	7	-0.958304	-1.32839	-1.64255	-1.62128	-1.71995	-2.12159	-1.94297	-1.90318	-1.71959	-1.88599	0.452252	-0.780437	-1.24206	-1.28966	-0.920094	-0.914759
nucleotide interconversion	1	-0.877356	-1.40953	-1.53587	-1.68134	-1.62013	-1.80158	-1.66114	-1.57596	-1.48945	-1.90488	1.54142	3.25243	-0.522586	1.68842	-0.916902	-0.968838
pyrimidine synthesis	1	6.7772	0.0561589	-1.48471	-1.6026	-1.07697	10.0652	7.08207	9.88664	11.1836	10.1561	0.701864	-1.39339	-0.847115	-1.3096	-0.914983	-0.969669
triacylglycerol synthesis	1	-1.4197	-1.05196	-0.917436	-0.710851	-0.88705	1.62314	0.779978	2.24969	2.9113	3.0397	-1.13787	-1.03094	-1.25838	-1.22534	-0.900195	-0.970507
beta-alanine metabolism	1	-1.52991	-1.47631	-1.18054	-0.471788	-0.49533	-0.101902	-1.4552	-0.730343	-1.14338	-1.23663	-1.22236	-0.26729	7.30014	7.6047	-0.880087	-0.932002
coa synthesis	1	-0.209538	-1.06648	-1.1458	-1.18101	-1.16627	2.62474	2.67724	2.67204	2.99594	4.33478	0.168017	-0.912413	-0.193747	-1.24623	-0.878125	-0.890836
urea cycle/amino group metabolism	1	-0.530479	2.73677	2.69991	2.05217	2.49657	8.25002	5.78296	6.35196	7.78386	12.5282	-1.47355	-1.64419	-1.52817	-1.67748	-0.852771	-0.772801
cyp metabolism	1	0.1537	-0.911095	-1.07737	-0.848874	-0.964092	-1.40789	-1.69162	-1.45731	-1.52342	-1.06327	-1.04684	-1.17771	-1.11918	-1.1966	-0.830837	-0.834486
n-glycan synthesis	3	-1.34229	-0.714141	-0.698301	-0.77506	-0.711474	-1.67515	-1.40597	-1.38378	-1.28376	-1.30653	-0.990837	-0.857432	-1.12134	-1.1929	-0.819684	-0.825505
carnitine shuttle	2	2.26554	-0.26876	0.0795257	0.0321432	0.0859795	4.31956	3.63715	3.85951	2.16153	1.83517	-0.990087	-1.10346	-1.10291	-1.07628	-0.794776	-0.801232
tetrahydrobiopterin metabolism	1	-1.33544	-0.957794	-1.03569	-1.15706	-1.25618	1.73667	0.288497	0.880949	1.00942	1.42982	1.31118	-1.12896	-1.12645	-1.16441	-0.79039	-0.853176
c5-branched dibasic acid metabolism	1	-0.447546	-1.06112	-1.09545	-1.17908	-1.21956	-0.535958	-1.07143	-0.390619	0.0253457	0.0143303	-0.784333	-1.07943	-0.871441	-1.07925	-0.778208	-0.790793
imp synthesis	1	3.75658	-0.103284	-0.374435	-0.31243	0.233894	-2.14913	-1.99278	-1.98438	-1.95494	-1.96364	48.5632	14.7696	-1.04985	-1.04547	-0.776937	-0.806533
eicosanoid metabolism	1	-1.2993	-1.268	-1.35235	-1.29847	-1.37871	-2.13619	-1.92335	-1.85719	-1.8687	-1.88444	-0.911163	-1.04939	-0.978208	-1.01939	-0.776798	-0.771346
fatty acid metabolism	1	-1.29491	-1.35857	-1.2904	-1.38817	-1.57558	-2.1393	-1.99332	-2.0266	-2.05013	-2.08339	-0.944003	-0.0256374	6.04983	-1.13559	-0.772408	-0.815187
alanine and aspartate metabolism	1	-1.24462	-0.960041	-0.801146	-0.938963	-0.851392	1.53413	2.89799	3.2731	3.98551	3.62182	1.89776	4.38492	6.91291	3.37676	-0.756435	-0.826745
bile acid synthesis	4	-1.30697	-1.36229	-1.39446	-1.39061	-1.506	-2.24132	-2.24988	-2.13129	-2.06484	-2.04681	-0.604161	-1.08665	-0.88918	-1.1308	-0.749021	-0.811551
phosphatidylinositol phosphate metabolism	1	-0.375528	-0.687312	0.216399	0.0229396	-0.152792	-1.09289	-1.56766	-1.49118	-1.50339	-1.58465	1.49814	-1.12228	0.360235	-0.746896	-0.747793	-0.769489
folate metabolism	5	-1.22506	-1.25265	-1.21123	-1.32465	-1.2192	-2.0522	-1.99806	-1.90982	-1.93263	-1.9558	-0.949522	-1.07983	-0.966669	-1.08626	-0.74307	-0.750662
vitamin b6 metabolism	1	-0.398415	1.17601	1.33121	1.47768	0.785354	-1.12759	-1.10465	-1.38985	-1.43898	-1.4774	-0.94507	-0.111472	-0.947354	-0.538255	-0.729855	-0.743755
fatty acid oxidation	10	-1.1276	-1.07688	-1.13272	-1.09294	-1.1814	-1.82807	-1.80278	-1.77036	-1.60443	-1.57768	-0.707113	-1.07689	-0.138751	-0.9121	-0.725095	-0.76003
dipeptide degradation	1	-0.235135	-1.27855	-1.22552	-1.35803	-1.24379	-2.04846	-1.8776	-1.92478	-1.94732	-1.92753	-0.926394	-1.03779	-1.0172	-1.06609	-0.722527	-0.703048
glycerophospholipid metabolism	5	-1.24154	-1.22125	-1.15222	-1.31934	-1.41353	-1.83305	-1.47537	-1.52452	-1.56755	-1.7222	-0.964271	-1.07424	-0.689735	-1.03628	-0.711692	-0.70421
exchange/demand reaction	1	-1.35712	-1.05688	-1.00556	-1.15486	-1.1908	-1.37241	-1.20351	-1.38278	-1.56694	-1.22866	0.200663	0.840276	-0.908307	-0.141898	-0.69096	-0.753654
glycosylphosphatidylinositol (gpi)-anchor synthesis	1	-1.1726	-1.12538	-1.23434	-1.15722	-1.25604	-1.44196	-1.1958	-1.16522	-1.09495	-1.25234	0.629162	-0.971817	-0.892153	-1.0113	-0.680593	-0.722133
biotin metabolism	1	-1.21598	-1.06462	-1.14748	-1.25259	-1.19053	-1.91283	-1.75306	-1.76383	-1.7335	-1.61586	-0.820934	-0.925834	-0.895146	-0.994633	-0.650943	-0.705679
galactose metabolism	1	-1.20712	-1.16325	-1.20728	-1.24895	-1.2365	0.630299	0.0747767	0.491779	1.1506	0.0253167	-0.800844	-1.01919	-0.925711	-1.02144	-0.650369	-0.70289
sphingolipid metabolism	7	-1.16539	-1.07014	-1.10416	-1.23145	-1.2321	-1.6937	-1.57531	-1.52407	-1.4614	-1.51709	0.235066	-0.630758	-0.940224	-1.00121	-0.634524	-0.701502
triacylglycerol synthesis	5	-1.0664	-1.11508	-1.07042	-1.06736	-1.20225	-1.61396	-1.6368	-1.63265	-1.77298	-1.6918	-0.880035	-0.949929	-0.925763	-0.912709	-0.62792	-0.690528
starch and sucrose metabolism	5	-1.00762	-1.01279	-1.09174	-1.08331	-1.15185	-1.75513	-1.61101	-1.6215	-1.64266	-1.5618	-0.796457	-0.889974	-0.872177	-0.887643	-0.619725	-0.618608
limonene and pinene degradation	1	-1.07499	-1.02166	-0.504966	0.735432	0.711942	1.04647	-0.44543	-0.047797	-0.469494	-0.402344	-0.801084	0.601336	12.3273	12.7753	-0.612733	-0.648997
heme synthesis	1	-0.94352	-0.955269	-1.03052	-1.06203	-1.12698	3.52847	7.51893	5.06063	3.21113	0.853234	-0.722692	-0.868947	-0.794669	0.133293	-0.608818	-0.619638
hyaluronan metabolism	1	-1.03367	-1.04066	-1.1356	-1.12794	-1.19071	-1.83662	-1.61349	-1.67957	-1.65482	-1.6482	-0.777255	-0.635452	-0.881657	-0.956785	-0.608645	-0.627819
heme degradation	1	-0.984992	-0.960922	-1.02327	-1.01954	-1.08847	-0.501996	-0.831312	-0.765597	-0.680388	-0.722657	-0.735412	-0.80136	-0.774033	-0.822831	-0.579567	-0.603364
taurine and hypotaurine metabolism	1	-0.72874	1.34585	1.5137	0.559837	0.394692	-1.59621	-1.49168	-1.55675	-1.49557	-1.53369	-0.793243	-0.854912	-0.787201	-0.83511	-0.575922	-0.632801
exchange/demand reaction	22	-1.0581	-0.962095	-0.983709	-1.01645	-1.19364	-1.61092	-1.57008	-1.52446	-1.55457	-1.57372	-0.713826	-0.850851	-0.788703	-0.790177	-0.57206	-0.614874
transport, extracellular	17	-1.05356	-1.04839	-1.01659	-0.980092	-1.05111	-1.63361	-1.6109	-1.54246	-1.5547	-1.57745	-0.739875	-0.849859	-0.782828	-0.816674	-0.558587	-0.593143
bile acid synthesis	6	-0.712919	-0.881124	-0.875978	-0.930125	-0.941853	-1.41651	-1.30294	-1.32607	-1.3129	-1.38076	-0.717458	-0.835798	-0.738487	-0.778894	-0.553843	-0.586528
pentose and glucuronate interconversions	1	2.21731	6.9706	10.3022	9.21248	9.69072	-1.54614	-1.46806	-1.45898	-1.41797	-1.45071	-0.742969	-0.832656	5.62688	5.45494	-0.549078	-0.583858
transport, extracellular	3	-0.868242	-0.863679	-0.90341	-0.971235	-0.97553	-1.4874	-1.41584	-1.3829	-1.41764	-1.449	-0.648662	-0.785932	-0.764864	-0.788656	-0.546265	-0.588796
starch and sucrose metabolism	2	0.934381	3.90586	5.6087	6.32952	5.76183	-1.46785	-1.42152	-1.47319	-1.42996	-1.44079	-0.668746	-0.754264	-0.726704	-0.766787	-0.545087	-0.561446
unassigned	5	-0.872739	-0.90008	-0.929564	-1.01659	-0.981802	-1.5288	-1.494	-1.36211	-1.4843	-1.46988	-0.660675	-0.780025	-0.756522	-0.762566	-0.542286	-0.549383
steroid metabolism	11	-0.896313	-0.88409	-0.984275	-0.960585	-0.94859	-1.52237	-1.39423	-1.40453	-1.41983	-1.3751	-0.643202	-0.789188	-0.699482	-0.74229	-0.525049	-0.571476
propanoate metabolism	9	-0.797956	-0.821946	-0.85834	-0.882276	-0.925515	-1.39386	-1.29298	-1.31726	-1.32076	-1.27153	-0.661472	-0.719715	-0.534106	-0.7221	-0.521398	-0.532978
transport, golgi apparatus	3	-0.824666	-0.802591	-0.882668	-0.880225	-0.94964	-1.54841	-1.32632	-1.28479	-1.32285	-1.36141	-0.668279	-0.727704	-0.703108	-0.74255	-0.513172	-0.582233
pentose phosphate pathway	14	-0.833957	-0.897598	-0.96232	-0.998765	-1.04889	-1.48892	-1.39146	-1.46506	-1.37204	-1.33978	-0.725053	-0.827548	-0.803469	-0.842974	-0.505485	-0.554078
fatty acid metabolism	6	-0.836845	-0.837726	-0.868657	-0.894592	-0.940949	-1.41354	-1.3044	-1.24392	-1.28478	-1.27805	-0.612997	-0.727674	-0.653209	-0.455317	-0.502604	-0.551325
selenoamino acid metabolism	1	-0.832923	-0.879937	-0.842842	-0.929898	-0.971307	-1.30101	-1.32622	-1.25797	-1.30891	-1.31422	-0.635137	-0.72308	-0.677822	-0.744564	-0.499704	-0.520613
ros detoxification	1	1.32623	0.44174	0.635955	-0.0830566	0.000411637	-0.516234	-0.645806	-0.446575	-0.495502	-0.264825	-0.161556	-0.683746	-0.0807875	-0.146901	-0.4765	-0.482632
galactose metabolism	7	-0.762277	-0.659847	-0.816017	-0.793717	-0.847028	-1.02554	-0.92927	-0.875432	-0.738592	-0.864403	1.19224	-0.0677209	-0.613343	-0.654828	-0.46152	-0.466523
butanoate metabolism	9	-0.79347	-0.82729	-0.820968	-0.871289	-0.929152	-1.35406	-1.29026	-1.2783	-1.32029	-1.27425	-0.684974	-0.711919	-0.568455	-0.705608	-0.456908	-0.555451
hyaluronan metabolism	7	-0.151113	-0.612423	-0.746449	-0.84236	-0.902927	-0.95767	-1.09608	-0.954232	-0.948426	-0.92865	-0.546529	-0.670901	-0.615441	-0.677719	-0.447002	-0.46159
citric acid cycle	9	-0.758454	-0.625597	-0.623602	-0.737734	-0.773966	-1.3577	-1.11314	-1.19881	-1.15093	-1.09304	-0.513852	-0.669527	-0.58574	-0.629683	-0.444047	-0.47334
vitamin b2 metabolism	1	0.547662	-0.246288	-0.268541	-0.0375703	0.0847783	-0.346085	-0.353488	0.388931	0.782607	-0.182903	-0.553773	-0.635446	-0.568002	-0.664624	-0.438977	-0.45565
valine, leucine, and isoleucine metabolism	15	-0.705723	-0.732156	-0.696825	-0.85917	-0.91269	-1.25266	-1.20906	-1.18499	-1.18912	-1.1587	-0.500062	-0.656482	-0.613522	-0.63419	-0.43834	-0.471562
glycerophospholipid metabolism	12	-0.499069	1.48201	2.77222	3.8467	5.59193	0.253513	0.8056	0.598449	0.217127	-0.298958	-0.51268	-0.587353	-0.52244	-0.672365	-0.436034	-0.46633
arachidonic acid metabolism	1	-0.777189	-0.703415	-0.81082	-0.768476	-0.802072	-1.2384	-1.13074	-1.16118	-1.12932	-1.1287	-0.565443	-0.65807	-0.592732	-0.633413	-0.429078	-0.448435
galactose metabolism	3	-0.763194	-0.763107	-0.72408	-0.823112	-0.856275	-1.264	-1.11091	-1.17459	-1.10053	-1.11398	-0.586259	0.0475522	-0.598291	-0.627213	-0.414521	-0.439007
salvage pathway	1	-0.629913	-0.635702	-0.702436	-0.730475	-0.679488	-1.05935	-1.00338	-0.977388	-0.997871	-0.9875	-0.496964	-0.552202	-0.524319	-0.57728	-0.412096	-0.414031
fatty acid oxidation	4	-0.796802	-0.699646	-0.769789	-0.780858	-0.835843	3.22014	2.72362	2.58156	2.5091	3.7602	-0.514823	-0.65756	-0.62051	-0.633463	-0.40891	-0.435875
riboflavin metabolism	1	-0.430591	-0.622613	-0.636196	-0.647538	-0.684832	-1.15368	-1.0925	-1.07496	-1.06649	-1.11447	0.088679	-0.562118	-0.588618	-0.604059	-0.407652	-0.43271
glycine, serine, alanine and threonine metabolism	2	-0.74774	-0.765343	-0.764216	-0.869216	-0.800309	-1.18587	-1.19079	-1.20241	-1.14433	-1.1246	-0.614377	-0.657551	-0.589243	-0.606819	-0.407144	-0.416845
pentose phosphate pathway	4	-0.733553	-0.696753	-0.718715	-0.800598	-0.835547	-1.15581	-1.12774	-1.10043	-1.09391	-1.07017	-0.498656	-0.609493	-0.561814	-0.601772	-0.402212	-0.464923
valine, leucine, and isoleucine metabolism	2	-0.700283	-0.652172	-0.718419	-0.737072	-0.728131	-1.04639	-0.934745	-0.858263	-0.935585	-0.847047	7.80274	2.17566	7.28724	0.40542	-0.389105	-0.378831
glycolysis/gluconeogenesis	4	-0.662647	-0.688168	-0.602433	-0.628479	-0.742312	-1.08103	-1.04837	-1.03792	-1.02708	-1.01065	-0.463114	-0.485941	-0.508767	-0.57469	-0.386493	-0.41866
transport, extracellular	21	-0.644258	-0.658525	-0.668414	-0.718739	-0.664829	-1.06346	-1.08384	-1.01165	-1.09306	-1.00452	-0.514351	-0.565457	-0.525423	-0.572478	-0.386403	-0.398949
transport, extracellular	18	-0.74983	-0.711781	-0.740061	-0.761198	-0.766065	-1.17348	-1.09025	-1.12057	-1.08099	-1.05506	-0.511535	-0.647014	-0.535597	-0.603754	-0.38582	-0.451302
sphingolipid metabolism	4	-0.627182	-0.645208	-0.652964	-0.650648	-0.676787	-1.11748	-1.03113	-1.04925	-1.08667	-1.08708	-0.454209	-0.602977	-0.14623	-0.0367659	-0.384314	-0.422849
valine, leucine, and isoleucine metabolism	9	-0.674125	-0.643497	-0.68128	-0.72109	-0.794998	-0.999461	-0.939342	-0.898662	-0.878598	-0.879458	-0.50761	-0.569248	-0.333854	-0.551945	-0.383352	-0.406763
butanoate metabolism	1	-0.675446	-0.703128	-0.678069	-0.671123	-0.765838	0.659844	0.340542	0.905568	0.973267	1.67793	-0.485311	0.319707	-0.538384	-0.0227991	-0.383264	-0.408078
transport, peroxisomal	6	-0.487822	-0.597696	-0.725806	-0.651837	-0.725136	-1.09394	-0.947577	-0.852799	-0.932534	-0.899563	-0.452279	-0.554071	-0.514178	-0.565526	-0.375566	-0.430915
unassigned	4	-0.657544	-0.654918	-0.717722	-0.676497	-0.778331	-1.07497	-1.03471	-1.07283	-1.01751	-1.03053	-0.473229	-0.499088	-0.49452	-0.571499	-0.373842	-0.418554
glyoxylate and dicarboxylate metabolism	6	-0.859893	-0.859324	-0.880679	-0.852557	-0.975554	-1.40146	-1.27295	-1.1423	-1.08971	-0.917783	-0.592966	-0.726729	0.758238	1.75655	-0.372004	-0.336644
glycerophospholipid metabolism	20	-0.605291	-0.548433	-0.621873	-0.568658	-0.651662	-0.94919	-0.967314	-0.934318	-0.8939	-0.913467	-0.445362	-0.475076	-0.459225	-0.49693	-0.361627	-0.356232
thiamine metabolism	1	-0.579728	-0.598118	-0.567651	-0.660874	-0.595042	-0.960242	-0.926673	-0.925707	-0.87456	-0.916969	-0.450135	-0.482845	-0.478094	-0.48396	-0.355796	-0.364171
glycine, serine, alanine and threonine metabolism	9	-0.571139	-0.62683	-0.618188	-0.688545	-0.72216	-1.01452	-0.890706	-0.91819	-0.882882	-0.897045	-0.384993	-0.468198	-0.472394	-0.502123	-0.354897	-0.343851
transport, mitochondrial	2	0.323334	-0.319071	-0.208057	-0.240755	-0.230596	0.915523	0.581439	0.717753	0.338274	0.165768	-0.364074	-0.502441	-0.468743	-0.502674	-0.350837	-0.36029
fatty acid synthesis	1	-0.592754	-0.590606	-0.553661	-0.655041	-0.733489	-1.01897	-0.941511	-0.89828	-0.945154	-0.914189	-0.432243	-0.51068	-0.492986	-0.486625	-0.347198	-0.371888
transport, lumen	19	-0.5461	-0.569025	-0.527737	-0.617669	-0.55489	-0.83025	-0.800722	-0.854129	-0.766603	-0.844733	-0.35325	-0.470577	-0.417065	-0.468543	-0.342506	-0.303211
chondroitin / heparan sulfate synthesis	4	-0.621165	-0.56868	-0.619704	-0.615645	-0.701685	-0.989179	-0.930232	-0.897693	-0.915186	-0.968243	-0.402435	-0.487531	-0.49488	-0.50682	-0.333291	-0.35921
glycolysis/gluconeogenesis	14	0.029052	-0.405372	-0.428156	-0.411107	-0.418336	-0.908194	-0.818798	-0.784256	-0.651071	-0.648444	-0.463203	-0.55426	-0.36141	-0.426404	-0.332829	-0.323176
d-alanine metabolism	1	-0.159664	0.1012	-0.075777	-0.569952	-0.615264	-0.872015	-0.823296	-0.81535	-0.847309	-0.774637	-0.387515	-0.459376	-0.43555	-0.443494	-0.327558	-0.313774
phosphatidylinositol phosphate metabolism	4	-0.527257	-0.520052	-0.575074	-0.590065	-0.633795	-0.881431	-0.85868	-0.815407	-0.817227	-0.783753	-0.390026	-0.452804	-0.442678	-0.450454	-0.32659	-0.343615
eicosanoid metabolism	24	-0.590202	-0.56243	-0.518848	-0.645304	-0.588478	-0.917701	-0.928888	-0.781872	-0.856907	-0.859202	-0.456974	-0.506899	-0.443605	-0.469642	-0.326503	-0.337211
glycerophospholipid metabolism	2	-0.526725	-0.524111	-0.584136	-0.605662	-0.539999	-0.893223	-0.846392	-0.829134	-0.852963	-0.81954	-0.395677	-0.456911	-0.439283	-0.442602	-0.324216	-0.338626
transport, extracellular	5	-0.64325	-0.538817	-0.547972	-0.64403	-0.659159	-0.915174	-0.890623	-0.85491	-0.858134	-0.819906	-0.380247	-0.48457	-0.419998	-0.508035	-0.32363	-0.357705
nad metabolism	5	-0.580478	-0.616676	-0.588336	-0.650381	-0.723301	-0.98424	-0.861955	-0.96817	-0.917309	-0.947976	-0.47225	-0.508821	-0.483657	-0.524322	-0.32286	-0.345476
glutathione metabolism	2	-0.517625	-0.498958	-0.4554	-0.49839	-0.479431	-0.799563	-0.774297	-0.765175	-0.759408	-0.797991	-0.334533	-0.422116	-0.390619	-0.431386	-0.318643	-0.283418
carnitine shuttle	6	-0.601823	-0.575836	-0.518243	-0.55907	-0.584187	-0.879026	-0.80592	-0.78636	-0.805284	-0.779674	-0.417145	-0.459666	-0.429799	-0.475932	-0.317335	-0.323719
glutathione metabolism	5	-0.558097	-0.471041	-0.420203	-0.461189	-0.461718	-0.839871	-0.806	-0.809944	-0.71914	-0.584812	-0.398527	-0.428631	0.039843	-0.448218	-0.315991	-0.322271
transport, peroxisomal	2	0.66777	-0.0914532	0.0394451	0.0130894	0.154702	1.59012	1.42844	1.67096	0.924438	0.590586	-0.410802	-0.445366	-0.414445	-0.441956	-0.309432	-0.33212
unassigned	11	-0.579244	-0.542375	-0.530323	-0.566939	-0.594953	-0.936364	-0.853203	-0.82442	-0.872967	-0.737682	-0.402279	-0.464609	-0.421213	-0.478783	-0.304545	-0.331296
imp synthesis	3	-0.465805	-0.498741	-0.55075	-0.51084	-0.521895	-0.854723	-0.772269	-0.796039	-0.741895	-0.73702	1.66999	-0.44236	-0.309056	1.65551	-0.303744	-0.305415
tyrosine metabolism	2	0.889833	2.84231	4.46857	4.59095	4.98027	2.53692	3.85965	2.5823	2.63965	1.21636	-0.398972	-0.470385	-0.40079	-0.464046	-0.3019	-0.303381
glyoxylate and dicarboxylate metabolism	14	0.0365967	-0.326164	-0.354792	-0.390893	-0.384824	-0.854326	-0.77234	-0.743873	-0.619752	-0.606054	-0.402708	-0.486146	-0.315174	-0.368588	-0.301688	-0.301406
cyp metabolism	4	-0.466752	-0.497235	-0.523506	-0.561354	-0.544385	-0.802362	-0.716355	-0.766998	-0.793757	-0.800137	-0.386167	-0.405684	-0.366974	-0.419156	-0.299425	-0.30573
methionine and cysteine metabolism	5	-0.443412	-0.465779	-0.430025	-0.533248	-0.510588	-0.707804	-0.711899	-0.729436	-0.713189	-0.77119	-0.34512	-0.398925	-0.391952	-0.377455	-0.297803	-0.29161
fatty acid oxidation	9	-0.454246	-0.530195	-0.564152	-0.526949	-0.586232	-0.887427	-0.770144	-0.887644	-0.878091	-0.810976	-0.367785	-0.461518	-0.416401	-0.46986	-0.295838	-0.353764
unassigned	6	-0.344285	-0.469364	-0.424862	-0.546541	-0.536203	-0.855986	-0.750259	-0.783607	-0.787049	-0.742645	-0.379415	-0.444605	-0.370341	-0.421828	-0.293178	-0.318874
fructose and mannose metabolism	14	0.113735	-0.331178	-0.379377	-0.381025	-0.398636	-0.783531	-0.819876	-0.656543	-0.644398	-0.660057	-0.434556	-0.494126	-0.330586	-0.382117	-0.286016	-0.289277
chondroitin / heparan sulfate synthesis	1	-0.478111	-0.411579	-0.436359	-0.471754	-0.406993	-0.729293	-0.681473	-0.655842	-0.640771	-0.699595	-0.291034	-0.347095	-0.333917	-0.371889	-0.273909	-0.242388
transport, lumen	21	-0.525044	-0.447115	-0.459762	-0.461646	-0.527805	-0.776673	-0.699547	-0.704021	-0.681392	-0.717157	-0.366656	-0.398807	-0.376528	-0.403513	-0.273198	-0.283333
urea cycle/amino group metabolism	9	-0.465835	-0.454739	-0.487403	-0.531884	-0.525693	-0.755133	-0.703769	-0.739011	-0.699105	-0.681117	-0.316697	-0.399783	-0.347185	-0.402855	-0.269176	-0.27873
d-alanine metabolism	6	-0.443411	-0.473044	-0.510276	-0.499983	-0.502607	-0.777703	-0.699603	-0.706799	-0.708903	-0.741003	-0.401438	-0.406851	-0.367284	-0.409177	-0.266472	-0.279545
vitamin d metabolism	1	-0.46449	-0.483677	-0.474235	-0.570695	-0.490571	-0.776601	-0.844781	-0.770405	-0.789145	-0.786107	-0.349348	-0.459438	-0.427975	-0.398932	-0.262235	-0.295729
valine, leucine, and isoleucine metabolism	4	-0.44125	-0.439735	-0.456246	-0.458161	-0.51818	1.88459	1.55603	1.62523	1.61645	2.52322	-0.368577	-0.402435	-0.376866	-0.383622	-0.261315	-0.288318
heme synthesis	5	-0.431157	-0.437507	-0.453697	-0.441462	-0.44606	-0.690829	-0.643391	-0.66412	-0.653267	-0.631157	-0.358935	-0.373128	-0.349808	-0.365614	-0.25959	-0.248699
transport, golgi apparatus	1	-0.532429	-0.112823	-0.00506906	-0.172128	-0.0620748	-0.0140954	0.144089	0.0779616	-0.00931488	0.155544	1.51845	2.13155	-0.155057	1.10859	-0.259055	-0.299361
o-glycan synthesis	1	-0.432474	-0.377888	-0.413527	-0.393476	-0.553533	-0.680102	-0.670128	-0.68346	-0.678715	-0.668559	-0.286992	-0.341644	9.84282	-0.354803	-0.25853	-0.263512
cholesterol metabolism	6	-0.434426	-0.435117	-0.472367	-0.465531	-0.397262	-0.724417	-0.659483	-0.681961	-0.640879	-0.660905	-0.307814	-0.370135	-0.344482	-0.334892	-0.257532	-0.260323
eicosanoid metabolism	26	-0.429971	-0.392897	-0.414441	-0.303408	-0.394436	-0.61793	-0.566782	-0.592147	-0.55662	-0.612883	-0.340715	-0.344488	-0.293194	-0.336267	-0.240247	-0.236682
nucleotides	3	-0.101491	-0.404427	-0.40761	-0.420127	-0.556965	0.674158	-0.0349492	0.445658	0.764252	0.495691	-0.308211	-0.357811	-0.325876	0.61844	-0.239119	-0.238591
unassigned	7	-0.424147	-0.411152	-0.410347	-0.394706	-0.469757	-0.631232	-0.631321	-0.5847	-0.575214	-0.646515	-0.282167	-0.342882	-0.294906	-0.326764	-0.235756	-0.261023
urea cycle/amino group metabolism	5	-0.390977	-0.334578	-0.359958	-0.442041	-0.417331	-0.634615	-0.597908	-0.513554	-0.622672	-0.614394	-0.259387	-0.309257	-0.291889	-0.311523	-0.234872	-0.239348
eicosanoid metabolism	4	-0.367	-0.388691	-0.320226	-0.402425	-0.349577	-0.575558	-0.626674	-0.615912	-0.601281	-0.603857	-0.270005	-0.337978	-0.28044	-0.320876	-0.232893	-0.25647
transport, lumen	29	-0.424611	-0.33554	-0.354806	-0.443612	-0.414863	-0.61405	-0.555917	-0.588704	-0.577751	-0.623352	-0.267833	-0.344976	-0.311503	-0.328966	-0.232886	-0.214358
transport, endoplasmic reticular	11	-0.382455	-0.385928	-0.381084	-0.375883	-0.432641	-0.638887	-0.58343	-0.609089	-0.635317	-0.589392	-0.299156	-0.328698	-0.286176	-0.305162	-0.232819	-0.240717
cholesterol metabolism	27	-0.360966	-0.425344	-0.345282	-0.360237	-0.426075	-0.651279	-0.622221	-0.573448	-0.580442	-0.60311	-0.23866	-0.335455	-0.323513	-0.326757	-0.232374	-0.248156
fatty acid oxidation	2	0.627567	-0.0752374	0.0154581	0.0145769	0.0938027	1.17539	1.00723	1.4955	0.598756	0.601997	-0.261083	-0.32197	-0.28474	-0.312108	-0.23173	-0.241776
transport, extracellular	23	-0.38612	-0.369747	-0.363757	-0.394058	-0.364746	-0.616133	-0.57108	-0.592341	-0.5632	-0.569602	-0.331185	-0.333603	-0.310294	-0.303423	-0.230924	-0.246581
transport, golgi apparatus	4	-0.353534	-0.398285	-0.439531	-0.421842	-0.400671	-0.575503	-0.607503	-0.56442	-0.564892	-0.604902	-0.283983	-0.301742	-0.336984	-0.256424	-0.230695	-0.217593
taurine and hypotaurine metabolism	2	-0.412204	-0.39034	-0.328771	-0.448084	-0.423879	0.870663	0.217585	0.986723	2.00015	3.27384	-0.301212	4.90383	-0.3175	2.32997	-0.22752	-0.236764
ros detoxification	5	-0.363019	-0.386606	-0.375333	-0.371564	-0.357087	-0.608653	-0.585741	-0.607053	-0.594796	-0.602146	-0.248584	-0.302164	-0.314759	-0.352787	-0.226352	-0.216781
transport, lumen	25	-0.383475	-0.348264	-0.380477	-0.403709	-0.409356	-0.676104	-0.557112	-0.573207	-0.552326	-0.622747	-0.262368	-0.274853	-0.281084	-0.310971	-0.226334	-0.222716
n-glycan degradation	5	-0.368215	-0.335267	-0.37735	-0.427929	-0.386875	-0.619583	-0.580954	-0.579923	-0.596124	-0.597728	-0.271033	-0.349973	-0.300522	-0.346757	-0.225658	-0.247079
keratan sulfate degradation	5	-0.414715	-0.404513	-0.346378	-0.407791	-0.451563	-0.597782	-0.587957	-0.568071	-0.581303	-0.570031	-0.316771	-0.294871	-0.28467	-0.312491	-0.224526	-0.233688
alanine and aspartate metabolism	2	-0.476899	-0.398808	-0.446555	-0.485658	-0.520662	-0.726031	-0.649308	-0.641843	-0.624232	-0.564786	-0.338501	-0.369983	-0.316835	-0.363551	-0.223923	-0.226141
coa catabolism	7	-0.434723	-0.383974	-0.445875	-0.427873	-0.370329	-0.621516	-0.572051	-0.551987	-0.601936	-0.538665	-0.310039	-0.331393	-0.332384	-0.300205	-0.221731	-0.252394
glycolysis/gluconeogenesis	6	-0.147058	-0.331386	-0.352341	-0.440726	-0.424143	-0.564493	-0.631111	-0.597284	-0.589458	-0.621119	-0.311391	-0.310418	-0.320935	-0.343135	-0.221195	-0.237712
arachidonic acid metabolism	22	-0.377891	-0.389694	-0.380661	-0.418865	-0.353315	-0.654962	-0.604116	-0.547005	-0.559071	-0.565318	-0.283369	-0.328285	-0.311104	-0.323091	-0.220503	-0.230788
tyrosine metabolism	30	-0.365814	-0.402446	-0.396613	-0.390355	-0.359077	-0.595988	-0.587957	-0.577891	-0.556673	-0.609301	-0.276739	-0.327915	-0.279446	-0.330258	-0.220471	-0.198649
bile acid synthesis	9	-0.384986	-0.408483	-0.393028	-0.387685	-0.456961	-0.457846	-0.399068	-0.409356	-0.363146	-0.30821	-0.308591	-0.330053	-0.33787	-0.286578	-0.220312	-0.241849
galactose metabolism	5	-0.39611	-0.33909	-0.374454	-0.480581	-0.371307	-0.661701	-0.549777	-0.547494	-0.552818	-0.567795	-0.342618	-0.320565	-0.305784	-0.287308	-0.214954	-0.236482
nucleotide sugar metabolism	3	-0.152686	0.0886036	-0.0150526	0.30975	0.415941	-0.607808	-0.60916	-0.5872	-0.638465	-0.554813	-0.297863	-0.329483	-0.286857	-0.301466	-0.213339	-0.25659
eicosanoid metabolism	28	-0.414371	-0.374226	-0.375563	-0.4316	-0.399217	-0.638652	-0.589532	-0.587353	-0.53991	-0.516574	-0.287845	-0.311415	-0.208029	-0.309574	-0.211761	-0.249946
vitamin a metabolism	19	-0.399404	-0.384982	-0.417257	-0.386762	-0.433651	-0.617061	-0.591311	-0.632195	-0.604107	-0.537964	-0.255768	-0.324929	-0.294675	-0.312232	-0.207305	-0.230022
transport, endoplasmic reticular	4	-0.348085	-0.381342	-0.352115	-0.355473	-0.450282	-0.624441	-0.57308	-0.584568	-0.630017	-0.560562	-0.286605	-0.331149	-0.272852	-0.326776	-0.204546	-0.213992
purine catabolism	5	-0.340376	-0.383192	-0.359996	-0.38	-0.475571	-0.621211	-0.564162	-0.600402	-0.585384	-0.620653	-0.285593	-0.31637	-0.282478	-0.351453	-0.204373	-0.249983
glycolysis/gluconeogenesis	9	-0.403614	-0.366817	-0.376301	-0.383975	-0.428633	-0.632878	-0.592078	-0.62989	-0.578881	-0.644679	-0.282441	-0.340951	-0.277188	-0.332654	-0.199177	-0.235002
fatty acid metabolism	5	-0.345153	-0.352114	-0.394117	-0.39309	-0.388955	-0.607131	-0.508524	-0.616416	-0.586003	-0.577038	-0.239577	-0.325755	-0.34974	-0.313468	-0.196372	-0.23028
purine catabolism	6	-0.418104	-0.35438	-0.3613	-0.423959	-0.35174	-0.604197	-0.586912	-0.576654	-0.556349	-0.549002	-0.263032	-0.326067	-0.218372	-0.332146	-0.192368	-0.250269
galactose metabolism	14	-0.29145	-0.301887	-0.311111	-0.325942	-0.367902	-0.563888	-0.491463	-0.501905	-0.457489	-0.518508	-0.286263	-0.276371	-0.24457	-0.294397	-0.19021	-0.182202
urea cycle/amino group metabolism	2	-0.382102	-0.369882	-0.399879	-0.390697	-0.402831	-0.651308	-0.572675	-0.592917	-0.579717	-0.602142	-0.0283228	-0.304383	-0.213742	-0.346353	-0.188027	-0.241469
beta-alanine metabolism	4	-0.291271	-0.333791	-0.334289	-0.324452	-0.361775	1.30629	1.31674	1.07808	0.955452	1.57484	-0.283742	-0.27894	-0.263204	-0.298832	-0.179476	-0.21402
tryptophan metabolism	4	-0.328127	-0.365749	-0.284032	-0.371635	-0.378993	1.20687	1.197	1.10703	1.03655	1.63548	-0.252562	-0.267174	-0.278586	-0.276459	-0.178622	-0.190735
ros detoxification	6	-0.126245	-0.34855	-0.296741	-0.352372	-0.413001	-0.571549	-0.481371	-0.546488	-0.547884	-0.528808	-0.263951	-0.281745	-0.257451	-0.28086	-0.176855	-0.152048
vitamin a metabolism	2	-0.246273	-0.270266	-0.261165	-0.286768	-0.349335	-0.428152	-0.424021	-0.402734	-0.366899	-0.398764	-0.185425	-0.208071	-0.190971	-0.221634	-0.173145	-0.172638
transport, lysosomal	2	0.531645	-0.0364584	0.116658	-0.0400253	0.0501826	0.755321	0.683795	0.921264	0.335052	0.244272	-0.231259	-0.243803	-0.211633	-0.242744	-0.154489	-0.166007
pentose phosphate pathway	5	-0.361639	-0.264443	-0.305182	-0.244819	-0.274171	-0.466182	-0.453655	-0.392149	-0.444758	-0.420612	-0.279227	-0.235724	-0.21335	-0.220359	-0.152049	-0.156867
transport, extracellular	25	-0.258707	-0.285127	-0.267836	-0.265297	-0.338809	-0.455888	-0.405591	-0.419657	-0.377902	-0.399349	-0.189604	-0.228795	-0.208386	-0.226917	-0.146431	-0.157327
urea cycle/amino group metabolism	23	-0.317178	-0.297318	-0.274241	-0.274768	-0.228293	-0.437303	-0.383413	-0.392356	-0.382553	-0.377431	-0.189885	-0.253135	-0.240072	-0.223598	-0.142738	-0.157938
lysine metabolism	6	-0.461749	-0.42483	-0.402147	-0.445095	-0.422811	-0.717794	-0.590296	-0.681311	-0.656698	-0.661157	-0.243094	-0.349729	-0.364358	-0.363925	-0.131112	-0.25707
transport, extracellular	4	-0.28887	-0.22168	-0.273023	-0.302924	-0.249223	-0.452998	-0.458164	-0.436459	-0.393597	-0.347469	0.303373	0.73014	0.299431	0.26597	-0.116461	-0.0720764
purine catabolism	1	0.175879	8.40713	9.05639	8.43442	8.39001	4.30635	2.1793	1.17859	-0.381287	0.0769557	2.76049	5.99631	4.92688	6.57978	-0.017069	0.286586
pyruvate metabolism	1	-0.591727	5.36125	9.52217	10.2267	9.04664	-2.03124	-2.60282	-1.73017	-1.26764	1.36923	-2.75068	3.90406	13.1518	20.9784	0.165312	0.920854
glycolysis/gluconeogenesis	1	-0.13547	2.99013	2.55079	3.69372	4.1063	3.99652	0.510334	1.91364	2.64922	6.2691	1.76251	6.72701	4.50848	7.63116	0.170308	0.774714
pyrimidine catabolism	1	-2.11167	-1.7179	-1.56375	-1.57928	-1.82179	-0.181953	-1.39905	-0.765827	-0.977582	-0.55751	1.47424	3.22381	-0.84252	0.462768	0.339107	0.226683
transport, endoplasmic reticular	1	-0.596352	-0.63981	-0.680869	-0.712122	-0.784763	-0.9305	-0.962154	-0.934295	-0.90578	-0.844128	0.427257	0.528627	-0.471146	0.30909	0.587876	0.680918
pentose phosphate pathway	1	0.0357705	2.3363	2.57649	2.18113	2.42277	-0.442748	-0.547797	-0.111655	-0.121633	0.439305	1.56449	4.35708	0.269733	2.00937	0.707788	1.26868
glyoxylate and dicarboxylate metabolism	1	-1.39504	0.61466	1.38393	1.09207	0.312499	3.06959	3.0699	4.94885	6.42241	4.98427	-1.39945	5.28008	5.86952	10.9098	0.76077	1.33255
glycerophospholipid metabolism	1	-1.62746	-0.408605	0.232384	-0.0469364	-0.0356169	0.0707102	0.00203583	-0.584551	-1.29357	-0.33619	-1.07765	1.23387	-1.73391	-0.164316	0.866684	1.25766
histidine metabolism	1	-1.78229	-1.85576	-1.53483	-0.932578	-0.990357	0.273774	-0.741718	0.0392462	-0.110027	1.47732	-1.41923	5.31931	5.80132	10.0302	0.932471	1.49259
squalene and cholesterol synthesis	1	-0.810149	-0.851749	-0.994498	-1.04432	-1.08945	-1.38253	-1.33726	-1.29854	-1.37152	-1.28745	1.90871	6.16105	0.681685	3.50434	0.966751	1.34322
ascorbate and aldarate metabolism	1	-1.20489	-0.571567	0.226472	1.42434	1.48223	1.15266	-0.0167054	0.347138	0.325022	1.94782	-1.03927	8.10456	8.25053	13.9362	1.78189	2.49206
propanoate metabolism	1	-1.37409	-1.33456	-1.45085	-1.42684	-1.54745	2.72207	0.511351	1.39821	1.43683	5.1468	0.143891	2.06801	-0.92521	0.314631	2.36971	3.21487
arginine and proline metabolism	1	25.4661	5.07689	2.17599	2.82663	3.11537	-1.92961	-2.88018	-2.23903	-2.40633	-2.38077	-1.33209	-1.56347	3.70315	4.04844	2.61669	-0.224299
cholesterol metabolism	4	-1.87244	-1.66682	-1.68156	-1.86766	-1.87437	-1.59091	-1.91764	-1.54468	-1.49506	-0.335949	0.0406987	0.993114	-0.721229	-0.298644	2.69917	3.91404
tyrosine metabolism	1	-3.22759	-3.35854	-3.45435	-3.4682	-3.50272	-2.17482	-2.17562	-1.7022	-1.03912	3.14273	-2.49388	13.0953	-2.34117	9.71422	3.34968	4.67173
phenylalanine metabolism	1	-1.54031	-1.51809	-1.51588	-1.60149	-1.59711	-0.260095	0.0256449	0.064901	0.744379	3.61315	-1.10652	13.2244	-1.19846	8.47401	3.47897	5.3699
unassigned	1	-0.715786	15.2007	10.466	8.6546	8.85773	3.0695	-2.04508	-1.55718	-0.983643	3.52298	6.17766	8.11839	3.48749	4.27405	4.79698	4.76272
cholesterol metabolism	1	-0.826175	5.79837	3.431	1.47861	1.48367	3.22194	4.47164	4.16997	2.24614	2.74796	0.285198	4.34836	-1.15414	2.4522	5.0126	5.45884
coa catabolism	1	-0.726094	23.7479	13.1985	8.80877	8.96465	3.26183	1.08817	1.54921	1.41422	2.39174	-0.620389	-0.69639	-0.672757	-0.681117	13.3003	12.9265
fatty acid oxidation	1	20.4998	3.19901	1.87614	3.40558	5.05818	16.8599	5.0894	10.6321	11.3314	18.611	-3.97152	-5.70071	-5.71537	-6.30905	46.0857	45.1819
