# Supplementary material for: Dynamic genome-scale cell-specific metabolic models reveal novel inter-cellular and intra-cellular metabolic communications during ovarian follicle development
Source: BMC Bioinformatics. 2019 Jun 10;20:307. doi: 10.1186/s12859-019-2825-2 (PMC6558917; doi:10.1186/s12859-019-2825-2)
Supplement: Supplementary file 6 — Mean fold change and fdr-corrected p-values for each follicle cell type during ovarian follicle development. (XLSX 6750 kb) [file 12859_2019_2825_MOESM8_ESM.xlsx]

## Sheet: Oocyte
ENTREZ_GENE_ID	Average intensity					Fold change					p-values (fdr-corrected)					Presence					Location
	PM	PR	SC	SA	LA	PRvsPM	SCvsPR	SAvsSC	LAvsSA	LAvsSC	PRvsPMp	SCvsPRp	SAvsSCp	LAvsSAp	LAvsSCp	PR.Pre	PM.Pre	SC.Pre	SA.Pre	LA.Pre
11303	8.70108	5.82902	5.27757	5.2902	5.42683	-7.321	-1.466	1.009	1.099	1.109	4.03344e-12	0.00934997	0.963866	0.583689	0.441328	1	1	1	1	1	OoCc
11306	7.49146	6.22068	5.80093	6.1671	6.01077	-2.6475	-1.361	0.533	-0.1475	0.413	0.000901811	0.293456	0.00246553	0.162668	2.60258e-06	1	1	1	0.5	0.5	OoCcMur
11307	7.27727	7.72142	8.24232	8.45013	8.42341	1.361	1.435	1.155	-1.019	1.134	0.0237173	0.0273036	0.426959	0.934763	0.412009	1	0	1	1	1	Oo
11308	7.2187	7.50162	7.55725	7.4996	7.80021	0.640667	0.373667	-0.377333	0.585333	0.532667	0.233576	0.768072	0.636164	0.306953	0.262983	1	1	1	1	1	OoMur
11352	10.7745	11.3144	11.2133	11.5205	11.6158	1.4545	-0.077	1.2415	1.0695	1.3225	0.000218768	0.499927	0.0855886	0.611629	0.00552374	1	1	1	1	1	Oo
11363	8.15336	5.5187	4.48062	5.20141	5.3506	-6.21	-2.053	1.648	1.109	1.828	2.5616e-09	0.00153816	0.0196192	0.689629	0.00300409	0	1	0	0	0	Oo
11364	8.57502	7.72726	7.73227	7.64669	7.80985	-1.8	1.003	-1.061	1.12	1.055	8.19329e-06	0.984156	0.692352	0.428948	0.659111	1	1	1	1	1	Oo
11416	5.23113	4.5051	4.84176	4.79282	4.6848	-1.654	1.263	-1.035	-1.078	-1.115	0.0116438	0.332671	0.913563	0.810259	0.635859	0	0	1	0	0	Oo
11426	7.68618	7.44709	6.86263	6.14071	6.39587	-1.18	-1.499	-1.649	1.193	-1.382	0.165934	0.00807961	0.00187948	0.281062	0.0186406	1	1	1	1	1	Oo
11428	8.54707	8.61138	8.34136	8.46161	8.63233	0.0525	-1.211	0.095	1.127	1.2435	0.199046	0.340492	0.479952	0.507244	0.46136	1	0.5	1	1	1	OoMur
11429	7.98683	8.32436	8.32904	8.08694	7.95499	1.264	0.0035	-1.1825	-1.096	-1.296	0.00825176	0.490341	0.119233	0.453269	0.00901127	1	1	1	1	1	Oo
11430	6.82494	6.69466	6.85969	6.04601	5.91067	-1.095	1.121	-1.758	-1.098	-1.931	0.461128	0.469199	0.000789974	0.60771	7.41164e-05	1	0	1	0	0	OoMur
11431	7.77392	6.95804	6.97144	7.10761	7.00225	-1.6832	-0.563	1.1006	-0.2954	0.2216	0.00327211	0.367439	0.630592	0.354566	0.149686	0.8	1	0.6	0.6	0.8	OoCc
11432	6.5685	6.17168	5.90697	6.29512	6.31028	-1.317	-1.201	1.309	1.011	1.323	0.100366	0.390701	0.214882	0.971543	0.136575	1	1	1	1	1	Oo
11441	8.58193	7.0707	6.76412	6.85612	6.61913	-2.851	-1.237	1.066	-1.179	-1.106	2.59197e-06	0.325143	0.813608	0.543018	0.632651	1	1	1	0	1	Oo
11449	4.2799	5.48198	6.00525	6.3574	6.54154	2.301	1.437	1.276	1.136	1.45	5.42951e-05	0.0772603	0.2699	0.613188	0.050895	0	0	0	0	1	Oo
11461	10.8823	10.2314	9.76618	8.91689	8.75681	-1.677	-1.398	-1.8475	-0.139	-2.219	0.272238	0.201819	0.0294549	0.347734	0.0711082	1	1	1	1	1	Oo
11465	12.0347	11.7159	10.934	10.0117	9.90333	-1.247	-1.719	-1.895	-1.078	-2.043	0.0139099	4.20551e-05	7.14466e-06	0.55755	5.46795e-07	1	1	1	1	1	Oo
11468	4.59187	5.02036	4.5156	5.28038	5.54397	1.346	-1.419	1.699	1.2	2.04	0.109772	0.121216	0.0241995	0.49634	0.00173458	0	0	0	1	1	Oo
11474	6.97253	8.0607	7.88394	8.08936	8.08375	2.126	-1.13	1.153	-1.004	1.149	2.90065e-06	0.422268	0.37115	0.984929	0.306256	1	1	1	1	1	Oo
11477	5.67613	6.03369	6.30652	6.3912	6.53414	1.2815	1.2275	0.077	0.1435	1.177	0.187549	0.518399	0.28615	0.200706	0.49207	1	0	1	1	1	Oo
11479	8.22338	9.25016	9.86471	9.43201	9.22081	2.037	1.531	-1.35	-1.158	-1.563	6.99184e-08	0.000347414	0.00602521	0.196535	8.72395e-05	1	1	1	1	1	Oo
11480	6.32923	5.61272	6.11183	5.80795	5.53184	-1.657	1.415	-1.2345	-1.217	-1.502	0.00159749	0.043213	0.246094	0.393669	0.0577599	0.5	0.5	1	0.5	0.5	OoCc
11481	6.66489	6.1641	5.91963	5.864	5.7771	-1.415	-1.185	-1.039	-1.062	-1.104	0.0304824	0.39787	0.876853	0.814671	0.599072	0	1	0	0	0	OoMur
11486	6.98404	8.01517	8.05401	7.7419	7.83141	2.044	1.027	-1.242	1.064	-1.167	2.34538e-06	0.870829	0.125476	0.719033	0.215897	1	1	1	1	1	Oo
11487	7.51626	7.39471	7.47698	7.28561	7.6894	-0.094	1.0595	-1.1425	1.335	1.1645	0.481262	0.712097	0.435228	0.175438	0.405273	1	0.5	0.5	0.5	1	Oo
11489	8.02579	6.52354	6.5361	6.44227	6.18611	-2.833	1.009	-1.067	-1.194	-1.275	2.43862e-08	0.963044	0.70057	0.248122	0.0574689	1	0	0	0	0	Oo
11491	6.72723	7.73521	7.7761	8.22249	8.34558	2.14867	-0.293667	1.37367	0.430333	1.48733	0.0165535	0.431833	0.149564	0.286521	0.0320617	1	0.666667	1	1	1	Oo
11496	8.85385	7.0662	6.80988	7.26372	7.44167	-3.453	-1.194	1.37	1.131	1.549	8.35667e-06	0.558295	0.262201	0.753917	0.0721528	0	1	0	0	0	Oo
11502	7.68945	7.89941	7.47954	7.67168	7.98425	1.157	-1.338	1.142	1.242	1.419	0.110356	0.0115005	0.264333	0.0785487	0.00173458	1	1	1	1	1	Oo
11512	5.30718	6.42646	6.95927	6.12631	5.70455	2.172	1.447	-1.781	-1.34	-2.386	4.11701e-05	0.0489793	0.00413829	0.153343	4.37274e-05	1	1	1	1	1	Oo
11515	6.55654	7.03627	6.81325	7.13459	7.35287	1.405	-1.171	1.25167	1.16667	1.46767	0.0570113	0.407751	0.218368	0.46772	0.0626665	1	1	1	1	1	Oo
11518	8.89147	9.78531	9.49425	9.58553	9.36741	1.858	-1.224	1.065	-1.163	-1.092	1.33392e-06	0.0707405	0.63651	0.223056	0.406272	1	1	1	1	1	Oo
11520	7.44752	7.34566	7.32282	7.17494	6.87234	-1.073	-1.016	-1.108	-1.233	-1.366	0.571182	0.935699	0.558825	0.208314	0.0263629	1	0	1	1	0	OoCcMur
11532	10.6124	10.7053	10.979	10.8263	10.669	1.066	1.209	-1.112	-1.115	-1.24	0.334102	0.0220355	0.223137	0.227044	0.00634842	1	1	1	1	1	Oo
11534	7.35104	6.8904	7.38028	7.69851	7.77098	-1.00267	1.44367	1.262	0.387333	1.326	0.429389	0.222093	0.478126	0.731778	0.390408	0.666667	0.666667	1	1	1	Oo
11536	5.28581	5.07768	5.16658	4.98732	5.17246	-1.155	1.064	-1.132	1.137	1.004	0.358341	0.783649	0.580967	0.584152	0.984015	1	1	1	1	0	OoCc
11541	5.67459	6.44822	6.75097	5.48962	5.26567	1.753	0.7715	-2.5725	-0.70075	-3.1955	0.189788	0.410287	0.00691509	0.550584	0.00344222	1	0.5	0.75	0.5	0.5	Oo
11544	9.16429	9.273	9.09088	8.83248	8.86307	1.078	-1.135	-1.196	1.021	-1.171	0.47495	0.341241	0.186138	0.905963	0.181159	1	1	1	1	1	Oo
11545	8.38659	8.10435	7.23904	6.54472	6.64386	-0.607	-1.83567	-1.62467	-0.242	-1.545	0.0495513	0.00824915	0.0214629	0.517077	0.134804	1	0.666667	1	0.333333	0.666667	OoCc
11546	8.61202	7.73122	7.93646	7.7093	7.5007	-1.841	1.153	-1.171	-1.156	-1.353	4.83811e-07	0.162839	0.141157	0.19967	0.00277601	1	1	1	1	1	Oo
11564	6.36975	6.74997	6.65314	5.71903	5.67875	1.302	-1.069	-1.911	-1.028	-1.965	0.0648734	0.735685	0.000865884	0.907776	0.000252114	1	1	1	0	0	Oo
11566	10.1971	10.9898	10.7834	10.5084	10.5236	1.732	-1.154	-1.21	1.011	-1.197	3.43331e-05	0.281378	0.164763	0.952686	0.1329	1	1	1	1	1	Oo
11569	8.18456	8.47254	8.53062	8.63109	8.5443	0.582667	0.375333	0.414333	-0.4	-0.313	0.188871	0.779283	0.621248	0.520678	0.222336	0.666667	0.333333	1	1	0.666667	Oo
11595	5.62939	5.24672	5.13044	5.25747	5.44116	-1.304	-1.084	1.092	1.136	1.24	0.0721901	0.689869	0.685014	0.558047	0.192103	0	1	0	0	0	Oo
11605	4.8888	4.05441	3.41292	3.94197	3.88314	-1.783	-1.56	1.443	-1.042	1.385	0.146436	0.3813	0.512023	0.951144	0.483751	0	1	0	0	0	Oo
11622	9.00874	8.90234	9.53094	9.55772	9.13353	-1.077	1.546	1.019	-1.342	-1.317	0.452177	0.0010954	0.907115	0.0295865	0.0145977	1	1	1	1	1	OoCcMur
11632	6.59142	7.45227	7.57589	7.65756	7.72015	1.816	1.089	1.058	1.044	1.105	0.000245792	0.65221	0.791232	0.855691	0.54395	1	0	1	1	1	Oo
11634	2.97709	5.51142	6.1277	7.10675	6.95967	5.793	1.533	1.971	-1.107	1.78	3.53268e-06	0.216053	0.0561153	0.827431	0.0678275	0	0	0	1	1	OoCc
11636	4.84369	5.41179	5.53555	5.73444	5.9094	1.483	1.09	1.148	1.129	1.296	0.027956	0.726269	0.582081	0.647807	0.188103	0	0	1	1	1	OoCc
11637	8.023	8.81253	8.9832	9.20616	9.16698	1.736	1.1265	1.1675	-0.0285	1.139	5.74778e-05	0.332327	0.188354	0.728354	0.321978	1	0.5	1	1	1	Oo
11639	9.77472	10.4349	10.0674	9.68561	9.87253	1.5905	-1.2975	-1.303	1.1405	-1.1465	0.000702825	0.111395	0.0220978	0.373049	0.274401	1	1	1	1	1	OoCcMur
11640	6.01491	7.57823	7.68083	8.00978	8.41193	3.268	1.074	1.2575	1.3265	1.6615	1.34526e-06	0.590722	0.0855014	0.0761616	0.000154925	0.5	0.5	1	1	1	OoCcMur
11641	6.65992	7.49233	7.49186	7.05532	7.29984	1.781	1	-1.353	1.185	-1.142	0.00268226	0.999082	0.186376	0.566165	0.548697	1	0	1	0	0	OoCc
11647	4.75699	5.24044	5.52569	5.44823	5.69074	1.398	1.219	-1.055	1.183	1.121	0.21771	0.588729	0.902891	0.68802	0.733198	0	0	0	0	1	Oo
11651	7.80467	8.03388	8.23092	8.39058	8.79272	1.172	1.146	1.117	1.321	1.476	0.231308	0.425546	0.558841	0.118339	0.0117882	1	0	1	1	1	Oo
11652	8.33798	8.26131	7.64366	7.55316	7.73672	-1.055	-1.534	-1.065	1.136	1.067	0.731929	0.0220942	0.784972	0.570773	0.727951	1	0	1	0	1	OoCcMur
11655	7.27008	7.91825	8.64796	8.40828	8.29114	1.567	1.658	-1.181	-1.085	-1.281	0.00284011	0.0050146	0.372929	0.706607	0.113226	1	0	1	1	1	OoMur
11666	7.03171	6.83051	6.88164	6.7162	6.82251	-1.15	1.036	-1.122	1.076	-1.042	0.342763	0.872445	0.586372	0.751954	0.826211	1	1	1	0	1	Oo
11669	7.30597	7.62707	7.21175	7.32028	6.83747	0.098	-1.34133	1.07867	-0.792667	-0.685667	0.396018	0.365715	0.734591	0.501995	0.256233	1	1	0.666667	0.666667	1	Oo
11671	5.74756	5.85988	6.32309	6.23395	6.63391	1.081	1.379	-1.064	1.319	1.24	0.430311	0.00992956	0.670706	0.0399557	0.0519008	1	0	1	1	1	OoCc
11674	8.91119	9.13507	8.85474	8.75608	8.76454	0.7248	-1.2194	-0.6722	-0.1934	-0.6658	0.0115481	0.254893	0.601725	0.607548	0.644759	1	0.8	1	1	1	Oo
11677	9.71933	10.3657	11.0098	10.969	10.9483	1.10367	1.56367	-1.02867	-0.344333	-0.378	0.0248765	0.00530774	0.861935	0.256331	0.125337	1	1	1	1	1	OoMur
11684	4.40795	5.60095	5.86209	5.94632	6.0903	2.286	1.198	1.06	1.105	1.171	0.000453801	0.502163	0.855506	0.760922	0.513581	0	0	1	1	1	Oo
11692	8.77065	9.54595	9.50936	9.43842	9.2276	1.7735	-1.026	-1.051	-1.158	-1.2185	0.000651702	0.811052	0.66859	0.180997	0.0663083	1	1	1	1	1	Oo
11702	7.95148	7.5249	7.95394	8.32022	8.33115	-1.371	1.372	1.2905	0.01	1.343	0.181762	0.232065	0.151267	0.11534	0.497421	1	0.5	1	1	1	Oo
11717	7.65458	8.87564	9.00874	7.97243	8.64956	2.331	1.097	-2.051	1.599	-1.283	2.92691e-07	0.529944	3.00912e-05	0.00451958	0.0477739	1	1	1	1	1	Oo
11720	3.26036	5.48161	6.25576	6.12832	6.18333	4.663	1.71	-1.092	1.039	-1.051	8.56227e-09	0.00699422	0.702182	0.884044	0.79752	0	0	1	1	1	Oo
11732	6.22399	7.2128	7.55323	7.10611	6.99521	1.985	1.266	-1.363	-1.08	-1.472	9.18243e-07	0.0503859	0.0138044	0.6034	0.00144767	1	0	1	1	1	OoMur
11733	6.8919	6.18332	6.40529	6.68734	6.62997	-1.634	1.166	1.216	-1.041	1.169	0.00300968	0.435759	0.338524	0.877306	0.377165	0	0	1	0	1	OoMur
11735	4.79934	4.51799	5.23023	5.77173	5.99032	-0.2645	1.6485	1.4555	1.164	1.694	0.150558	0.0628698	0.0790805	0.455143	0.00953549	0	0	0	0.5	1	OoCc
11736	8.36225	6.32461	6.3881	6.47226	5.82729	-4.106	1.045	1.06	-1.564	-1.475	7.03904e-10	0.797492	0.746778	0.0091008	0.00563342	1	1	1	1	0	Oo
11737	7.94172	7.19476	7.23786	7.42733	7.33762	-1.678	1.03	1.14	-1.064	1.072	1.67528e-05	0.82923	0.288943	0.667035	0.53343	0	1	0	0	0	OoMur
11739	9.55216	9.09311	9.19941	8.83118	8.50026	-1.37633	0.413667	-1.30133	-1.25833	-1.63767	0.00425766	0.319438	0.223142	0.0901182	0.00616758	1	1	1	1	1	Oo
11740	9.34966	8.98051	8.7296	8.48673	8.5711	-0.651375	-1.20687	-0.69875	0.563625	-0.3835	0.18106	0.434995	0.399665	0.678434	0.342106	1	1	1	1	1	Oo
11744	6.21506	6.04004	5.98664	5.75592	6.10388	-1.129	-1.038	-1.173	1.273	1.085	0.524255	0.898215	0.550753	0.357489	0.726453	1	1	1	1	1	OoCc
11747	5.6339	5.68017	7.01327	8.12864	8.72404	1.033	2.519	2.167	1.511	3.273	0.870643	0.000419268	0.00192036	0.0980597	1.1609e-05	0	0	1	1	1	Oo
11749	5.92356	7.31196	7.27749	7.11432	7.82449	2.618	-1.024	-1.12	1.636	1.461	8.05736e-07	0.911274	0.562045	0.0117369	0.0162517	1	0	1	1	1	OoMur
11750	8.37828	7.9696	7.82234	7.78714	7.41082	-1.055	-0.465	-0.365667	-0.731	-0.697667	0.153973	0.213783	0.517746	0.584408	0.311796	0.666667	1	0.666667	0.666667	0.666667	Oo
11758	6.40643	5.15519	4.87279	3.84952	4.72175	-2.38	-1.216	-2.033	1.83	-1.11	6.05445e-05	0.387595	0.00264721	0.0159213	0.623529	0	0	1	0	1	Oo
11764	8.43636	8.68854	8.67121	8.73208	8.71044	1.191	-1.012	1.043	-1.015	1.028	0.230854	0.959754	0.852883	0.951144	0.886011	1	1	1	1	1	OoCc
11765	7.81653	7.57104	7.36987	7.50316	7.58353	-1.19	-0.505333	0.44	0.393667	0.510667	0.300688	0.453755	0.549439	0.625965	0.228168	1	0.333333	0.333333	0.666667	1	Oo
11767	9.94398	10.5086	10.4423	10.3454	10.5981	1.481	-0.0505	-0.075	0.217	1.12	0.000686576	0.56147	0.505597	0.416511	0.5364	1	0.5	1	1	1	OoCc
11768	7.76176	8.05482	7.86819	8.40608	8.44992	1.225	-1.138	1.452	1.031	1.497	0.0530337	0.320876	0.00577743	0.863987	0.00156496	1	0	1	1	1	Oo
11772	7.28747	6.73329	6.25908	6.52717	6.41346	-1.468	-1.389	1.204	-1.082	1.113	0.00226971	0.0218714	0.215172	0.654024	0.423695	1	1	0	0	1	OoMur
11773	8.9369	7.68809	7.48192	7.57283	7.76381	-2.376	-1.154	1.065	1.142	1.216	3.4967e-06	0.421655	0.766071	0.510466	0.210289	1	1	1	1	1	Oo
11774	9.27874	8.74246	8.59025	8.6185	8.0706	-1.468	-1.113	0.02	-1.5525	-0.538	0.0127726	0.599096	0.839323	0.424783	0.430036	1	1	1	1	1	Oo
11776	9.10455	9.38577	8.94362	8.75325	8.90274	1.215	-1.359	-1.141	1.109	-1.029	0.164823	0.0730038	0.502204	0.623775	0.875664	1	1	1	1	1	Oo
11777	9.906	8.14741	7.47385	7.54739	8.26645	-3.384	-1.595	1.052	1.646	1.732	7.40875e-08	0.0107202	0.81902	0.0148529	0.00188327	1	1	1	1	1	Oo
11778	6.57542	6.95477	6.56074	6.60535	6.78155	1.3005	-1.314	1.0315	0.1385	1.1755	0.0268662	0.0460992	0.842171	0.516074	0.457171	1	1	1	0.5	1	Oo
11782	6.64428	6.04316	5.91169	6.07442	5.85869	-1.517	-1.095	1.119	-1.161	-1.037	0.00142314	0.563907	0.49426	0.363456	0.806228	1	1	1	1	1	Oo
11783	5.22877	5.33156	6.11889	6.63852	6.38407	1.074	1.726	1.434	-1.193	1.202	0.699094	0.015503	0.116026	0.498123	0.37472	1	0	1	1	1	Oo
11785	6.94423	6.92076	6.88447	6.86172	6.82583	-0.022	-1.0255	-0.0175	-1.0255	-0.046	0.0320547	0.90635	0.560638	0.918345	0.434693	1	1	1	1	1	Oo
11787	7.54362	7.21679	6.92539	6.79952	6.67901	-1.2765	-1.23	-0.109	-0.11	-0.282	0.384807	0.302623	0.251071	0.148613	0.0113577	1	0.5	1	0.5	0.5	Oo
11789	8.35385	8.28177	8.46001	8.88719	9.10689	-0.063	1.134	1.346	1.1715	1.5685	0.0420543	0.416968	0.0293939	0.441789	0.00124273	1	1	1	1	1	OoCc
11792	9.34268	8.80635	9.01768	9.20894	9.04322	-1.47933	1.159	1.14333	-0.461333	-0.310667	0.0137851	0.27199	0.369073	0.419337	0.385674	1	1	1	1	1	Oo
11793	5.75078	8.0387	8.21638	8.38054	8.3722	5.321	1.131	1.121	-0.006	1.117	1.4663e-10	0.385098	0.476565	0.766202	0.520222	1	0.5	1	1	1	Oo
11796	9.19768	11.0299	11.5685	11.6633	11.7679	3.561	1.453	1.068	1.075	1.148	7.23857e-07	0.0867165	0.813008	0.804482	0.510376	1	1	1	1	1	Oo
11797	7.82248	6.70808	6.86413	6.35181	6.61722	-2.165	1.114	-1.426	1.202	-1.187	9.56586e-06	0.542823	0.0362797	0.321564	0.26049	1	1	1	1	1	Oo
11798	6.35365	5.56171	5.07859	5.32273	5.18896	-1.60175	-1.0425	0.33275	-0.602	0.443	0.173448	0.312348	0.316964	0.384048	0.20618	0.5	0.5	0.5	0.25	0.75	Oo
11799	9.63888	10.252	10.6396	10.7699	11.0216	1.53	1.308	1.094	1.191	1.303	0.000715737	0.0493176	0.570781	0.248122	0.0363428	1	1	1	1	1	Oo
11800	9.80438	9.10753	8.58848	8.66943	8.83833	-0.956	-1.438	1.0595	0.147	0.231	0.0410865	0.0212147	0.731731	0.215709	0.151144	1	1	1	1	1	OoMur
11804	7.99671	7.7992	7.34808	6.97923	7.04095	-0.759	-1.0216	-0.7274	-0.3468	-1.2494	0.385189	0.175062	0.379364	0.159729	0.353265	1	1	0.8	0.6	0.8	Oo
11813	6.68519	4.23521	3.71521	3.15752	2.58557	-5.464	-1.434	-1.472	-1.487	-2.188	0.00288756	0.611365	0.610716	0.614816	0.187406	0	1	0	0	0	Oo
11818	8.96316	8.5881	8.36809	8.46794	8.60715	-1.297	-1.165	1.072	1.101	1.18	0.0646367	0.418612	0.75426	0.702346	0.311439	1	1	1	1	1	Oo
11821	8.22465	8.03671	7.90415	7.62254	7.60747	-0.16	-1.1005	-1.2265	-0.012	-1.2285	0.272979	0.578411	0.373899	0.342493	0.104747	1	1	1	1	1	Oo
11831	7.89567	7.66723	7.44797	7.55763	7.5837	-1.172	-1.164	1.079	1.018	1.099	0.165354	0.309399	0.657054	0.948995	0.503295	1	1	0	0	1	OoMur
11834	8.81192	8.10826	7.84827	7.75299	8.04659	-1.629	-1.197	-1.068	1.226	1.147	2.26159e-05	0.104289	0.616418	0.0970748	0.180928	1	1	1	1	1	Oo
11836	7.42627	6.24352	5.92448	5.96903	5.85587	-2.27	-1.248	1.031	-1.082	-1.049	3.13601e-07	0.0937445	0.854726	0.631551	0.721216	0	1	0	0	0	Oo
11837	10.5642	10.0445	9.84869	9.69024	10.0028	-1.434	-1.145	-1.116	1.242	1.113	0.00918647	0.422847	0.557372	0.22398	0.487566	1	1	1	1	1	Oo
11840	9.81702	10.4338	10.4289	10.3445	10.3726	1.5655	-0.0035	-1.0615	0.021	-0.044	0.0259261	0.574843	0.720415	0.56225	0.251611	1	1	1	1	1	Oo
11842	8.32621	8.39577	7.51807	7.53408	8.11473	-0.222667	-1.84533	0.345333	1.50233	1.51367	0.123597	0.0117735	0.81925	0.124295	0.0521374	0.666667	1	0.666667	0.666667	0.666667	OoCc
11843	7.60232	6.36844	6.32435	5.91212	5.6114	-2.3685	-0.032	-0.423	-1.2325	-1.7795	0.000167361	0.864473	0.322845	0.341022	0.306924	1	1	0.5	1	1	OoCc
11845	7.40929	7.52875	7.5559	7.48814	7.58028	0.448333	-0.303	-0.382333	0.407333	0.352	0.156599	0.271667	0.755396	0.613106	0.459231	1	0.666667	1	1	1	Oo
11847	6.61576	9.18606	9.77065	9.84555	9.89592	6.049	1.5005	1.0535	0.037	1.0935	2.56073e-09	0.0118217	0.673914	0.631033	0.494538	1	1	1	1	1	Oo
11848	8.52784	8.40208	7.88128	7.82412	7.91873	-1.0915	-1.4365	-0.0415	1.0685	0.028	0.371565	0.00425976	0.62305	0.676024	0.428001	1	1	1	1	1	Oo
11852	5.57599	6.50075	6.33284	5.43257	5.78238	1.898	-1.123	-1.866	1.274	-1.465	0.00178606	0.646915	0.00964837	0.3498	0.0695525	0	0	1	0	0	Oo
11855	6.93661	5.42176	4.97009	3.39385	2.37066	-3.06367	-1.37667	-3.09767	-2.243	-6.36367	0.0469314	0.467215	0.0510417	0.246296	0.000962151	0.333333	1	0.333333	0	0	Oo
11858	8.51918	6.99692	6.04025	5.25471	4.72106	-2.872	-1.941	-1.724	-1.448	-2.495	0.000594516	0.0463531	0.11473	0.324413	0.00461674	1	1	1	0	0	OoMur
11859	4.81847	5.17556	5.0377	4.87489	5.15432	1.281	-1.1	-1.119	1.214	1.084	0.137211	0.675273	0.644004	0.41	0.689695	1	0	0	0	0	Oo
11861	7.68963	8.5695	8.75018	8.51195	8.25299	1.2775	1.134	-0.2225	-1.208	-0.541	0.208291	0.393819	0.126076	0.441284	0.184974	1	1	1	1	1	Oo
11863	6.51137	7.15536	6.97406	7.1529	7.23914	1.6085	-0.149	1.137	0.067	0.227	0.0488788	0.419059	0.482866	0.528569	0.445136	1	1	0.5	1	1	Oo
11865	6.80622	8.14364	8.57619	8.77202	8.39363	2.527	1.35	1.145	-1.3	-1.135	1.30656e-06	0.0719602	0.47356	0.15237	0.424998	1	0	1	1	1	OoCc
11867	7.44007	8.74275	8.97987	8.79653	8.96174	2.467	1.179	-1.136	1.121	-1.013	7.46368e-07	0.303082	0.472224	0.543722	0.939493	1	0	1	1	1	Oo
11870	5.22502	5.99628	6.28584	5.96324	5.91255	1.707	1.222	-1.251	-1.036	-1.295	0.000494831	0.226068	0.200264	0.876979	0.0873807	1	0	1	1	1	Oo
11877	6.35154	5.91305	5.79829	5.59625	5.58665	-1.3735	-1.083	-1.156	-0.0065	-1.1615	0.189317	0.699872	0.547278	0.920218	0.443806	1	0	0.5	0.5	1	OoCcMur
11881	8.27196	7.9982	8.22626	8.89577	9.33686	-1.209	1.171	1.591	1.358	2.159	0.100166	0.293642	0.002149	0.0624818	5.8979e-06	0	0	0	0	1	Oo
11886	8.71837	8.19195	7.35129	6.99044	6.79992	-1.44	-1.791	-1.284	-1.141	-1.465	0.0102266	0.00147159	0.150414	0.501572	0.0146437	1	1	1	0	0	Oo
11890	5.39787	6.58348	6.93436	6.56705	6.8015	2.275	1.275	-1.29	1.176	-1.096	8.70255e-06	0.159223	0.162345	0.41748	0.584847	1	1	1	1	1	Oo
11891	6.20157	7.06052	7.08099	6.99082	7.04309	1.2705	0.015	-0.0695	0.0385	-0.031	0.237054	0.806751	0.660726	0.803727	0.360115	0.5	0.5	0.5	0.5	0.5	Oo
11905	6.12617	9.86957	10.2696	10.1754	9.51766	13.393	1.32	-1.067	-1.578	-1.684	2.97678e-15	0.0118954	0.60378	0.00092263	2.53073e-05	1	1	1	1	1	Oo
11906	7.05308	7.67039	7.30894	6.8987	6.32345	1.72	-0.82675	-0.8775	-1.5555	-1.806	0.229902	0.117853	0.136241	0.274012	0.0917129	1	0.75	0.75	0.5	0.5	OoMur
11907	8.08558	7.58806	7.50231	7.11963	6.83763	-0.845333	-1.06267	-0.707333	-1.216	-1.025	0.218088	0.777008	0.0811683	0.392267	0.293451	1	1	1	0.666667	0.666667	Oo
11908	9.04937	9.00457	8.72147	8.63108	8.68209	-1.032	-1.217	-1.065	1.036	-1.028	0.763231	0.107058	0.672611	0.832957	0.829939	1	1	1	1	1	Oo
11909	8.54104	8.21657	7.98407	8.30037	8.26517	-0.837667	-1.17833	1.246	-0.358333	1.21567	0.187025	0.405536	0.197369	0.888945	0.194032	1	1	1	1	1	Oo
11911	8.42598	8.93431	9.59094	9.60152	9.68535	0.6295	1.5805	0.0085	1.0615	0.079	0.0547657	0.0091347	0.402781	0.771178	0.205	1	0.5	1	1	1	Oo
11920	6.736	6.39127	5.95932	5.79295	6.09758	-1.27	-1.349	-1.122	1.235	1.101	0.201963	0.192795	0.678952	0.427752	0.673633	0	1	0	0	0	Oo
11921	5.63107	5.14862	5.44289	5.43254	5.78404	-1.397	1.226	-1.007	1.276	1.267	0.0430456	0.31763	0.978953	0.272422	0.197001	0	1	0	1	0	Oo
11925	5.35908	4.99577	5.53961	5.47816	5.67643	-1.286	1.458	-1.044	1.147	1.099	0.131939	0.0644264	0.872697	0.581486	0.637062	0	0	1	0	1	Oo
11927	9.07581	8.1604	8.35189	8.48686	8.39928	-1.886	1.142	1.098	-1.063	1.033	0.000334426	0.508459	0.680774	0.808376	0.867067	1	0	1	1	1	Oo
11928	6.50203	8.42476	7.28196	7.85099	8.90086	3.8065	-2.214	1.485	2.0715	3.0715	3.49859e-06	0.00715557	0.150037	0.0183557	0.000119597	1	0	0.5	0.5	1	Oo
11931	8.46523	8.04147	7.32516	6.84361	6.73032	-1.05275	-1.66475	-1.40525	-0.10325	-1.5335	0.207824	0.127463	0.243377	0.434254	0.0813851	1	1	1	1	1	OoMur
11933	9.40428	9.33362	9.55419	9.74021	9.96286	-1.05	1.165	1.138	1.167	1.327	0.636244	0.220636	0.341617	0.264324	0.0155615	1	1	1	1	1	Oo
11938	8.20488	8.85779	8.49165	8.53488	8.83355	1.60233	-1.29	0.365	1.24267	1.27	0.0763856	0.164887	0.641461	0.420706	0.159469	0.666667	0.666667	0.666667	0.666667	1	Oo
11944	6.91487	5.63563	5.58391	5.17138	4.51588	-2.427	-1.037	-1.331	-1.575	-2.097	7.80022e-05	0.900023	0.235958	0.0705977	0.00126485	0	1	0	0	0	Oo
11946	11.0154	10.8695	10.5864	10.5437	10.2555	-1.1065	-1.2205	-1.03	-1.223	-1.261	0.284961	0.199027	0.84002	0.118982	0.0365261	1	1	1	1	1	Oo
11947	9.74334	9.49173	9.37461	9.17307	9.17793	-1.191	-1.085	-1.15	1.003	-1.146	0.26752	0.712635	0.531039	0.990099	0.457786	1	0	1	1	1	Oo
11949	10.6345	10.0741	10.0466	9.99468	9.65122	-1.475	-1.019	-1.037	-1.269	-1.315	4.46012e-05	0.869486	0.760355	0.0265309	0.00319207	1	1	1	1	1	Oo
11950	9.57504	8.35205	8.295	8.47868	8.44255	-2.338	-0.043	1.136	-0.027	1.1105	1.44761e-06	0.584389	0.428825	0.728893	0.547042	1	1	1	1	1	Oo
11951	9.2163	8.28246	8.11395	8.03332	7.79574	-1.91	-1.124	-1.057	-1.179	-1.247	0.000169728	0.546405	0.803516	0.426174	0.179924	1	0	1	1	1	OoMur
11957	9.82717	9.17875	8.73085	8.56232	8.69112	-1.567	-1.364	-1.124	1.093	-1.028	0.0022863	0.0602167	0.542575	0.666858	0.874346	1	1	1	1	1	Oo
11958	9.93873	9.6839	9.82975	9.91818	10.0739	-1.19533	1.10833	0.4	1.11533	0.528333	0.264533	0.641223	0.627464	0.623621	0.392067	1	1	1	1	1	Oo
11964	7.93815	7.48358	7.47985	7.79376	7.71304	-0.4745	-0.003	1.244	-1.058	1.1755	0.219744	0.574316	0.100592	0.69851	0.135556	1	1	1	1	1	Oo
11966	7.85435	7.0581	7.05015	7.25914	7.48785	-1.737	-0.006	1.158	0.215	1.3935	0.00131384	0.825186	0.417847	0.160918	0.28907	0.5	0.5	0.5	0.5	1	Oo
11973	9.9361	10.8203	10.9492	10.7652	10.5107	1.846	1.093	-1.136	-1.193	-1.355	5.80273e-07	0.412564	0.250554	0.121379	0.00303409	1	1	1	1	1	Oo
11974	9.26674	9.05767	9.22378	9.19527	9.05372	-1.156	1.122	-1.02	-1.103	-1.125	0.0557476	0.210899	0.867254	0.344446	0.161603	1	1	1	1	1	Oo
11977	6.995	6.94193	7.02139	6.58538	6.3694	-0.0405	0.0625	-0.5085	-1.1665	-0.85	0.537435	0.567541	0.143806	0.544822	0.19221	1	1	1	1	1	Oo
11979	7.21634	6.75917	6.64338	6.84322	6.33742	-0.5865	-0.087	1.155	-1.4205	-1.2485	0.0400078	0.740598	0.581225	0.1352	0.400589	0.5	0.5	0	0.5	0	OoCc
11980	7.92226	8.71189	8.0331	7.67958	8.02127	1.28975	-1.2245	-0.90875	0.37875	-0.50625	0.201159	0.183659	0.282401	0.504674	0.529407	1	0.75	1	0.75	0.75	OoCc
11981	7.61503	7.80728	7.40197	7.18486	7.2326	1.1435	-1.325	-1.163	0.035	-1.1285	0.416367	0.154575	0.513684	0.818621	0.601293	1	0.5	1	1	1	Oo
11982	4.77664	3.95048	6.2414	6.21291	6.49896	-1.841	5.58133	0.274	1.23367	0.556667	0.171078	0.00279513	0.487969	0.744937	0.491895	0	0.333333	0.333333	0.666667	1	OoMur
11983	8.0856	8.10858	7.59775	7.43763	7.62971	1.016	-1.425	-1.117	1.142	1.022	0.88532	0.00753438	0.435113	0.354222	0.867183	1	1	1	1	1	OoCc
11984	10.6641	11.2933	11.2547	11.3952	11.156	1.592	0.305	0.439333	-0.548	-0.413333	0.053122	0.828118	0.549287	0.118362	0.0328451	1	1	1	1	1	Oo
11987	8.60844	10.0662	10.4736	10.4803	10.0494	3.1055	1.3395	0.0055	-1.35	-1.365	0.00248039	0.364143	0.667106	0.350438	0.350593	1	0	1	1	1	Oo
11988	7.74147	8.30719	7.78853	7.7704	7.73617	1.50933	-1.46233	0.300667	-0.357667	0.270667	0.0916533	0.0750608	0.147417	0.881947	0.206767	1	1	1	1	1	Oo
11989	4.28775	4.93677	5.24333	5.16441	5.02657	1.568	1.237	-1.056	-1.1	-1.162	0.00184847	0.188228	0.785484	0.631184	0.318873	1	0	0	0	0	Oo
11990	7.76642	8.67983	8.68234	8.71546	8.59038	1.883	1.002	1.023	-1.091	-1.066	5.48773e-05	0.993886	0.915085	0.709046	0.708979	1	0	0	0	0	OoMur
11991	8.2466	8.48246	8.07496	8.39986	8.44046	1.178	-1.326	1.253	1.029	1.288	0.331106	0.170563	0.311905	0.920797	0.182561	1	1	1	1	1	Oo
11992	7.63725	8.22954	8.59532	8.81802	8.60875	1.55367	1.29	1.18267	-1.15933	-0.322	0.143412	0.0880907	0.506313	0.355878	0.524294	1	1	1	1	1	Oo
11994	7.43415	5.87227	5.87288	5.77919	5.74361	-2.952	1	-1.067	-1.025	-1.094	1.91797e-05	0.999008	0.847474	0.960782	0.737019	0	1	1	0	0	Oo
12005	8.06428	8.07193	7.50271	7.62402	8.2166	1.005	-1.484	1.088	1.508	1.64	0.978977	0.0846576	0.769536	0.10392	0.0214717	1	1	1	0	1	Oo
12006	7.45673	8.95408	9.27342	9.28837	10.0039	2.823	1.248	1.01	1.642	1.659	2.34573e-07	0.177045	0.963415	0.0101442	0.00200906	1	1	1	1	1	Oo
12009	5.74016	6.6528	6.69124	6.77091	6.74745	1.882	1.027	1.057	-1.016	1.04	0.000202309	0.905732	0.804484	0.947445	0.832605	1	1	1	1	1	Oo
12010	7.92424	7.6337	7.38291	7.26489	7.50311	-0.2635	-1.197	-0.0945	1.181	0.0915	0.344735	0.371597	0.454275	0.3453	0.526529	1	0.5	1	0.5	1	Oo
12013	7.88447	6.09521	5.72899	5.3654	4.62796	-3.6465	-1.3215	-1.307	-1.6995	-2.299	6.4128e-07	0.475273	0.410084	0.0410552	0.00347819	0.5	1	0	0	0	Oo
12014	5.48527	5.74449	4.98826	4.28579	4.67529	1.197	-1.689	-1.627	1.31	-1.242	0.308412	0.0176771	0.0295867	0.262192	0.281388	1	1	0	0	0	Oo
12017	8.72131	6.72696	6.60786	6.69471	6.73345	-3.984	-1.086	1.062	1.027	1.091	1.9679e-07	0.739686	0.825227	0.928009	0.684298	1	1	1	1	1	Oo
12028	6.77228	6.60478	6.19504	6.42977	6.38504	-1.123	-1.328	1.177	-1.031	1.141	0.343303	0.057979	0.316161	0.880158	0.349066	1	0	1	1	1	Oo
12033	9.22574	8.82484	8.67704	8.63483	8.48426	-1.32	-1.108	-1.03	-1.11	-1.143	0.000757928	0.260419	0.79465	0.302164	0.105159	1	1	1	1	1	Oo
12034	9.30211	10.0004	10.0543	10.2295	9.94812	1.63467	0.373333	1.133	-1.22067	-1.07833	0.00114333	0.498562	0.47629	0.279932	0.592589	1	1	1	1	1	Oo
12035	7.80864	7.1785	7.22486	7.5532	7.6178	-1.644	0.0385	1.2705	1.046	1.331	0.274072	0.344236	0.381751	0.861913	0.273043	0.5	1	0.5	0.5	0.5	OoCcMur
12040	7.65062	7.33087	7.32021	7.93228	7.97025	-1.248	-1.007	1.528	1.027	1.569	0.09043	0.973198	0.0112816	0.906132	0.00386986	1	1	1	1	1	Oo
12042	7.82521	7.60648	7.93488	7.51403	7.32435	-0.543667	1.26867	-1.35033	-1.144	-1.56033	0.261049	0.296076	0.146258	0.444129	0.0791968	1	1	1	1	1	Oo
12048	8.02972	9.14143	8.61165	8.71607	9.02465	2.161	-1.444	1.075	1.238	1.331	1.28627e-05	0.0301711	0.726596	0.250094	0.063488	1	1	1	1	1	Oo
12049	10.1009	12.7523	12.8068	12.9018	12.9589	6.283	1.038	1.068	1.04	1.111	5.12426e-11	0.84158	0.733195	0.855759	0.479981	1	1	1	1	1	Oo
12050	4.98033	5.75448	5.63527	5.30929	5.3648	1.71	-1.086	-1.254	1.039	-1.206	0.00175299	0.703855	0.27024	0.883961	0.291688	1	0	0	0	0	Oo
12054	5.44656	6.49148	6.83156	6.73354	6.97662	2.063	1.266	-1.07	1.184	1.106	3.27709e-06	0.0926065	0.691743	0.285462	0.452576	1	0	1	1	1	Oo
12055	7.42428	8.83286	9.0256	9.12774	8.97956	3.461	0.1595	1.074	-1.1085	-0.034	0.0676858	0.405081	0.681308	0.528082	0.622351	1	1	1	1	1	Oo
12068	7.25392	7.64951	7.61805	7.80871	7.82763	1.315	-1.022	1.141	1.013	1.156	0.0195268	0.900861	0.388709	0.946003	0.259436	1	1	1	1	1	Oo
12123	5.59101	5.78004	5.74377	5.84798	6.0665	1.14	-1.025	1.075	1.164	1.251	0.287442	0.894289	0.694583	0.38149	0.107148	1	0	0	1	1	Oo
12124	3.5285	6.20831	6.17654	6.66457	6.55749	6.408	-1.022	1.403	-1.077	1.302	0.000385688	0.977123	0.606469	0.922462	0.630328	1	0	1	1	1	Oo
12125	7.51429	7.94659	7.46955	7.55758	7.50808	0.746	-1.40867	1.064	-0.367667	-0.296333	0.220052	0.214732	0.779311	0.334228	0.44231	1	0.666667	0.666667	1	1	Oo
12142	5.57185	6.0518	6.2407	7.16741	7.25242	1.395	1.14	1.901	1.061	2.016	0.0132701	0.430008	0.000397766	0.774515	6.84068e-05	1	1	1	1	1	OoMur
12144	8.89578	9.30169	8.98995	9.10253	9.25725	1.325	-1.241	1.081	1.113	1.204	0.0104577	0.0903642	0.605632	0.477153	0.115544	1	1	1	1	1	Oo
12151	8.88011	9.77195	10.0017	10.1111	10.1332	2.026	1.1835	1.0785	0.016	1.096	0.0487299	0.475345	0.677178	0.853029	0.536224	1	1	1	1	1	Oo
12155	6.11624	9.12367	9.63492	9.82048	9.66178	15.649	1.45767	0.481	-0.471333	0.350333	0.000333074	0.254863	0.45856	0.324118	0.421721	0.666667	0	1	1	1	Oo
12160	4.55796	8.29088	8.94012	9.66356	9.61427	14.0845	1.586	1.6515	-0.0355	1.5975	2.57911e-07	0.130388	0.167093	0.870608	0.128507	1	0	1	1	1	Oo
12161	6.62628	10.0999	9.69987	9.8291	10.117	11.109	-1.32	1.094	1.221	1.335	4.04635e-15	0.0094342	0.438935	0.0792268	0.00403581	1	0	1	1	1	OoMur
12166	6.47972	6.92264	7.06306	7.10038	7.09203	1.088	0.3154	0.2266	0.187	0.1964	0.149602	0.25663	0.29115	0.405707	0.0850671	1	1	0.8	1	1	OoCc
12167	7.18091	8.88737	8.93094	9.08432	9.21437	3.27867	0.365667	0.451333	0.437667	0.581667	6.16665e-07	0.714656	0.420038	0.246964	0.449	1	0.666667	1	1	1	Oo
12168	11.6555	11.1435	10.7869	11.1672	11.0003	-1.426	-1.28	1.302	-1.123	1.159	0.00105197	0.0409199	0.0303664	0.454137	0.186263	1	1	1	1	1	OoMur
12169	3.73074	3.45083	3.52235	4.62252	4.88416	-1.214	1.051	2.144	1.199	2.57	0.362237	0.876733	0.0059232	0.566412	0.000508546	0	0	0	0	1	Oo
12173	8.97388	10.3751	10.4717	10.2265	10.1034	2.641	1.069	-1.185	-1.089	-1.291	1.27668e-08	0.622684	0.192976	0.569145	0.0263896	1	1	1	1	1	Oo
12175	6.9666	6.54731	7.13619	6.91086	6.76056	-0.750667	1.52667	-0.560667	-1.112	-0.731333	0.10234	0.0395131	0.434303	0.567652	0.374817	1	1	1	0.666667	0.666667	Oo
12176	9.87116	8.78188	8.25748	8.07247	8.05418	-2.128	-1.438	-1.137	-1.013	-1.151	1.67915e-07	0.0035521	0.307246	0.93737	0.188901	1	1	1	1	1	OoMur
12177	9.47793	8.73065	8.65417	8.40621	8.22317	-1.70367	0.262333	-1.18867	-0.476333	-1.36433	0.000323278	0.310277	0.172231	0.36753	0.117801	1	1	1	1	1	Oo
12180	8.15364	8.08202	7.97751	8.01695	8.13887	-0.056	-0.078	0.0305	0.093	0.1375	0.341962	0.649964	0.492263	0.633983	0.29322	1	1	1	0.5	0.5	Oo
12181	7.92484	7.91126	8.02563	7.50865	7.27886	-1.009	1.083	-1.431	-1.173	-1.678	0.929294	0.538908	0.00496562	0.22694	8.8352e-05	1	1	1	1	1	Oo
12183	8.833	10.9979	11.0717	11.1378	11.05	4.52967	0.388	1.047	-1.063	-0.349	1.3863e-10	0.650397	0.790198	0.681103	0.71029	1	1	1	1	1	OoMur
12189	6.33566	6.6763	6.56679	6.79028	7.04707	0.682333	-0.416	1.17	1.19733	1.40567	0.00718003	0.46968	0.370969	0.316567	0.0213422	0.666667	0.666667	0.666667	0.666667	1	Oo
12190	9.2748	9.61145	9.48374	9.65704	10.063	1.263	-1.093	1.128	1.325	1.494	0.178671	0.71524	0.635852	0.231098	0.0412901	1	1	1	1	1	Oo
12192	4.99731	3.83876	4.47276	4.70542	4.93463	-2.863	0.7575	1.187	1.172	1.3895	0.344714	0.381632	0.698009	0.613536	0.246918	0.5	1	0	0.5	0	Oo
12193	8.72212	8.29801	7.43035	6.55876	6.40793	-1.342	-1.825	-1.83	-1.11	-2.031	0.0141338	0.000258575	0.000250222	0.537312	1.79547e-05	1	1	1	0	0	OoCcMur
12211	8.60081	6.95212	6.90004	7.28654	6.6517	-3.17	-1.037	1.308	-0.7905	-0.2915	6.01659e-06	0.845842	0.229892	0.268508	0.0117893	1	1	1	1	1	OoCc
12212	8.25544	7.3374	7.92404	7.83577	7.48153	-1.91767	1.50233	-0.387333	-0.684	-0.881	0.000205441	0.0436558	0.065135	0.322442	0.000260717	1	1	1	0.666667	0.666667	Oo
12215	7.77153	7.08089	6.88936	6.51641	6.70084	-1.614	-1.142	-1.295	1.136	-1.14	0.0034915	0.504517	0.189336	0.572767	0.460822	1	0	1	1	1	Oo
12223	6.18755	5.96055	5.81116	6.08479	6.21332	-1.17	-1.109	1.209	1.093	1.321	0.414633	0.697675	0.476078	0.770824	0.198623	0	1	0	0	0	Oo
12226	9.24617	7.49529	7.61017	7.28303	7.33769	-3.4135	0.0875	-1.278	1.0385	-1.2275	1.04535e-07	0.60161	0.45654	0.86414	0.489939	1	1	1	1	1	Oo
12227	5.92869	5.8498	5.84339	5.46793	5.75594	-1.056	-1.004	-1.297	1.221	-1.062	0.679938	0.984156	0.114215	0.25633	0.700971	1	0	1	1	1	Oo
12229	4.85615	7.80383	7.61282	8.08751	8.42415	7.715	-1.142	1.39	1.263	1.755	4.89719e-11	0.471045	0.0664222	0.223183	0.00131149	0	0	0	0	1	Oo
12234	6.9823	7.50719	7.7567	7.89401	8.01375	1.1265	0.70025	0.60275	0.591	1.2095	0.332269	0.270428	0.59651	0.608798	0.471987	0.25	0.5	0.5	0.75	1	OoMur
12235	7.76614	8.02994	7.66436	7.34823	7.58544	0.276	-1.2975	-0.2925	1.1895	-0.0635	0.0359796	0.12952	0.328537	0.462862	0.273063	1	1	1	1	1	Oo
12236	7.80272	9.84554	10.6288	10.6498	11.243	4.55933	1.72467	0.346	1.524	1.533	0.00329888	0.0808465	0.388524	0.0689799	0.094067	0.666667	0.333333	1	1	1	OoMur
12237	8.41359	9.3284	9.19696	9.47154	9.35596	1.283	-0.1015	1.211	-1.0835	1.117	0.477063	0.498107	0.148421	0.515376	0.287211	1	1	1	1	1	Oo
12238	9.10363	8.67128	8.52666	8.58094	8.75253	-1.35	-1.106	0.043	0.1555	1.181	0.105912	0.705908	0.589969	0.363345	0.583204	1	0.5	1	1	1	Oo
12258	4.77019	5.02514	5.07418	5.12888	5.12337	1.193	1.035	1.039	-1.004	1.035	0.232072	0.87875	0.872236	0.988727	0.857232	1	0	0	0	1	OoMur
12260	5.21255	5.56732	6.05453	6.39992	6.13408	0.3435	1.4055	1.301	-0.2515	0.06	0.325809	0.118891	0.482673	0.332189	0.674657	0	0.5	0.5	0.5	0.5	Oo
12261	10.647	9.14242	9.38799	9.28626	9.17872	-3.463	1.1875	-0.0755	-0.0985	-0.207	0.00315778	0.291296	0.712521	0.0761131	0.0240526	1	1	1	1	1	Oo
12282	8.21555	8.37476	8.14396	8.09783	8.20241	0.159	-1.1745	-1.0325	1.0755	1.0415	0.0346815	0.344176	0.877443	0.72885	0.810324	1	0.5	0.5	0.5	0.5	OoCcMur
12283	7.84769	8.0895	7.49475	7.23299	6.98759	0.2585	-1.515	-1.213	-0.2365	-1.442	0.0690777	0.0655997	0.490054	0.239268	0.133721	1	1	1	1	1	OoCc
12289	6.37451	5.64093	5.24768	4.99734	4.95335	-1.663	-1.313	-1.189	-1.031	-1.226	0.0251479	0.327692	0.583413	0.935789	0.425142	1	1	1	0	0	OoMur
12293	5.96239	7.02612	7.56894	8.10139	8.06675	2.09	1.457	1.446	-1.024	1.412	0.00358112	0.212026	0.230591	0.968193	0.203505	1	0	1	1	1	Oo
12294	4.81615	5.81889	5.90788	6.44461	6.25069	2.004	1.064	1.451	-1.144	1.268	2.18049e-05	0.73445	0.0233654	0.469912	0.102337	1	1	1	1	1	Oo
12297	4.94873	5.69958	5.73993	6.08675	6.56509	1.683	1.028	1.272	1.393	1.772	0.0149056	0.932197	0.386117	0.23359	0.0158601	0	0	0	0	1	Oo
12301	9.65734	8.23419	7.50541	6.51223	6.3374	-2.682	-1.657	-1.991	-1.129	-2.247	2.62513e-08	0.000734994	3.47179e-05	0.429593	1.82533e-06	1	1	1	1	1	Oo
12304	2.52043	6.70453	6.76932	6.12398	6.49879	18.178	1.046	-1.564	1.297	-1.206	2.90497e-08	0.92938	0.287243	0.586678	0.62644	1	0	1	1	1	Oo
12305	5.00792	6.1042	6.15932	6.3236	6.51761	2.26333	0.374	0.464333	0.490333	1.30533	0.0019395	0.611298	0.515876	0.45107	0.372507	0.666667	0.333333	0.666667	0.666667	1	OoCc
12306	6.08169	7.11023	7.61676	8.72081	8.12643	2.04	1.421	2.15	-1.51	1.424	1.18162e-05	0.0245491	5.83485e-05	0.019688	0.0151821	0	0	1	1	1	OoCc
12307	5.15369	6.69118	6.9798	8.10577	7.85457	2.903	1.221	2.182	-1.19	1.834	6.99204e-10	0.066685	1.11029e-06	0.146589	5.91582e-06	1	0	1	1	1	OoCcMur
12313	8.25211	8.83919	8.63766	8.60191	8.71814	0.8414	-1.1532	0.1672	0.6912	0.6634	0.294537	0.414695	0.463462	0.362454	0.384062	1	0.8	1	1	1	OoCcMur
12314	9.09082	9.57466	9.72688	9.70623	9.78816	0.527	1.112	-0.0145	0.066	0.048	0.0597424	0.397499	0.925021	0.269393	0.229736	1	1	1	1	1	Oo
12315	5.34484	6.12284	5.57225	5.27664	5.1082	1.80133	-1.502	-1.23733	-1.12533	-1.38367	0.145107	0.286783	0.480402	0.66984	0.143184	1	0	0.333333	0.666667	0.333333	Oo
12316	7.74092	8.34246	8.2967	8.56139	8.44186	1.16275	-0.035	1.208	-0.09725	0.6115	0.208265	0.728544	0.475745	0.618494	0.554244	0.75	0.75	0.75	0.75	1	OoMur
12317	9.57351	10.9123	10.3224	10.2728	10.5896	2.53433	-1.50633	-1.03533	1.24767	1.20633	1.72847e-08	0.000880104	0.793454	0.0831105	0.103785	1	1	1	1	1	Oo
12319	4.86342	5.83836	5.74374	5.92643	5.97135	1.966	-1.068	1.135	1.032	1.171	8.68591e-06	0.681637	0.427734	0.873311	0.229967	1	1	1	1	1	Oo
12321	7.87142	7.22623	6.92807	7.36427	7.72829	-1.586	-1.2485	1.3555	1.294	1.7655	0.00922284	0.456088	0.145166	0.312599	0.0214881	0.5	1	0.5	0.5	0.5	Oo
12325	7.46999	9.22602	9.56486	9.80169	9.43084	3.491	0.326	1.179	-1.2965	-1.098	7.53333e-08	0.363266	0.400492	0.194448	0.602996	1	0.5	1	1	1	OoMur
12328	8.98345	9.12671	9.11502	9.4293	9.18354	1.104	-1.008	1.243	-1.186	1.049	0.257432	0.954457	0.0499297	0.148054	0.655733	1	1	1	1	1	Oo
12330	6.9253	7.47756	7.01244	7.36411	7.56774	1.487	-1.393	1.2925	0.1665	1.4695	0.0720454	0.135269	0.352254	0.514635	0.0174809	1	0.5	1	1	1	OoCc
12336	8.85972	8.94578	8.31315	7.88401	8.4485	1.061	-1.55	-1.346	1.479	1.098	0.514816	0.000544664	0.0105918	0.00389004	0.367611	1	1	1	1	1	Oo
12339	7.69963	8.18327	8.02539	8.00774	8.30303	1.42933	-1.116	-0.345333	1.23633	1.21533	0.0554965	0.484557	0.660877	0.340336	0.188404	1	0.666667	1	1	1	Oo
12340	8.78775	8.54496	8.21078	8.52772	8.66561	-0.2645	-1.276	1.2715	1.104	1.381	0.000258019	0.19773	0.446049	0.501499	0.0100261	1	1	1	1	1	Oo
12343	8.43219	8.97248	8.72225	8.69526	8.46924	1.4895	-1.1895	-0.0215	-1.1715	-1.197	0.0533579	0.153869	0.242543	0.288555	0.255343	1	1	1	1	1	Oo
12345	7.8901	7.92576	7.95575	8.03161	8.02765	0.0295	0.0235	1.0545	-0.003	0.058	0.155095	0.432184	0.757568	0.266784	0.265658	1	0.5	1	1	1	OoCc
12359	7.8386	4.63916	2.17392	1.04473	2.28787	-9.186	-5.522	-2.187	2.367	1.082	0.000429895	0.0135018	0.279331	0.248122	0.913678	0	1	0	0	0	Oo
12361	6.59688	6.61099	6.71787	6.83775	7.14209	0.01	0.08	1.0895	1.2485	1.374	0.778203	0.772618	0.775367	0.43606	0.270306	1	1	1	1	1	Oo
12365	9.61575	8.89974	9.21385	9.51711	9.59491	-1.643	1.243	1.234	1.055	1.302	0.00988982	0.37543	0.406041	0.894247	0.212928	1	1	1	1	1	Oo
12366	9.60622	8.66017	8.25451	8.30058	8.21546	-1.927	-1.325	1.032	-1.061	-1.027	4.85644e-06	0.0338182	0.848555	0.725979	0.843738	1	1	1	1	1	Oo
12368	8.07144	6.51634	5.96876	5.30721	5.18659	-2.939	-1.462	-1.582	-1.087	-1.72	9.68962e-08	0.0193205	0.00669788	0.676681	0.000894117	1	0	0	0	0	Oo
12370	5.01837	6.54963	6.8231	7.48576	7.18056	2.89	1.209	1.583	-1.236	1.281	2.71327e-08	0.183922	0.00296975	0.177882	0.0589129	1	0	1	1	1	Oo
12371	5.39288	4.71111	4.96127	3.78632	4.53877	-1.604	1.189	-2.258	1.685	-1.34	0.231354	0.754814	0.105441	0.342599	0.529146	0	1	0	0	0	Oo
12373	6.43399	7.21798	7.18985	7.03345	5.92717	1.722	-1.02	-1.115	-2.153	-2.399	0.000476372	0.927928	0.579215	0.000521133	1.11417e-05	1	0	1	0	0	Oo
12385	9.12923	10.0947	10.0857	10.3887	10.2843	2.107	-0.0065	1.2345	-1.075	1.1495	0.00721903	0.912361	0.143435	0.656684	0.313067	1	1	1	1	1	Oo
12387	7.56344	8.739	8.77284	9.06432	9.44275	2.415	0.024	1.2265	1.307	1.6135	7.96814e-06	0.76714	0.2063	0.129765	0.00242232	0.5	0.5	0.5	0.5	1	Oo
12388	5.41347	6.91362	6.67835	6.88754	7.80573	2.989	-0.197	1.1565	1.894	2.1865	0.000129313	0.4984	0.565496	0.0537531	0.012308	0.5	0	0	0.5	1	Oo
12395	5.86055	7.37883	7.37835	7.73842	8.11229	6.19625	0.4985	1.29525	1.2995	1.70075	0.0565937	0.842573	0.395369	0.37501	0.11477	1	0.75	1	1	1	Oo
12396	8.98246	8.46765	8.61673	8.44662	8.21785	-1.429	1.109	-1.125	-1.172	-1.318	0.000206538	0.316167	0.273327	0.148452	0.00462994	1	1	1	1	1	Oo
12398	5.23519	5.88805	5.94041	5.92918	5.90369	1.572	1.037	-1.008	-1.018	-1.026	0.0106041	0.887391	0.97837	0.950578	0.909382	0	0	1	0	0	OoCcMur
12400	8.38497	8.15453	8.40168	6.61483	5.82348	-1.173	1.187	-3.451	-1.731	-5.972	0.0964659	0.142122	1.10023e-08	0.000451205	1.84369e-11	1	1	1	0	0	Oo
12402	6.83298	6.4844	7.29239	6.97157	6.28603	-1.276	1.764	-0.293	-1.614	-2.0425	0.11391	0.00717148	0.417915	0.0147943	0.00137804	0.5	0.5	1	0.5	0.5	Oo
12404	7.02616	6.42113	6.88668	7.02176	6.77395	-1.521	1.381	1.098	-1.187	-1.081	0.000315736	0.0113478	0.50715	0.206983	0.508017	0	0	1	1	1	Oo
12408	7.69249	7.66428	7.35718	7.35982	7.52813	-1.02	-1.237	1.002	1.124	1.126	0.847698	0.0714737	0.990654	0.392091	0.28274	1	0	1	1	1	Oo
12412	7.91286	8.02868	7.91904	8.11201	8.10371	0.424333	-0.414	1.15033	0.326333	1.143	0.0881203	0.643262	0.507342	0.555231	0.508673	0.666667	1	0.666667	1	1	OoMur
12416	8.15048	9.88225	10.0243	9.93051	10.0725	3.321	1.103	-1.067	1.103	1.034	1.59256e-07	0.629314	0.77731	0.670557	0.862339	1	1	1	1	1	Oo
12417	9.9674	8.12445	7.29604	6.14176	5.69406	-3.757	-1.77833	-2.27167	-0.810667	-3.21367	4.62151e-07	0.00915481	0.00270016	0.39969	1.25522e-05	1	1	0.666667	0.333333	0.333333	Oo
12418	8.60329	6.42694	6.12396	5.02977	4.92101	-4.52	-1.234	-2.135	-1.078	-2.302	1.63733e-09	0.204008	0.000125444	0.719947	1.70032e-05	1	1	1	0	0	Oo
12419	6.39866	6.10529	5.81851	5.81675	5.59591	-0.616333	-1.23067	0.325333	-0.512667	-0.55	0.0232858	0.419699	0.496462	0.466239	0.28817	0.333333	0.666667	0.333333	0	0.333333	Oo
12421	6.99119	5.82087	6.22115	6.51023	6.43389	-2.342	1.3225	1.2225	-0.0585	1.161	0.000146123	0.179288	0.374606	0.715964	0.441622	0.5	1	1	1	1	Oo
12428	9.16691	9.05813	9.13326	9.14633	9.23427	-1.079	0.064	0.01	0.069	0.086	0.380978	0.110897	0.470916	0.341245	0.112792	1	1	1	1	1	Oo
12442	8.90906	8.45385	9.07502	9.13155	9.29003	-1.371	1.538	1.04	1.116	1.161	0.00375993	0.0016122	0.80146	0.447327	0.192289	1	1	1	1	1	Oo
12444	4.16876	4.28426	4.68963	5.78043	6.62443	0.698	1.009	2.1884	1.8482	3.8994	0.523374	0.372777	0.0587397	0.191185	0.00236993	0	0	0	0.8	1	Oo
12445	6.48611	7.24772	7.17386	6.88388	6.76368	1.695	-1.053	-1.223	-1.087	-1.329	0.000963716	0.80527	0.285622	0.707867	0.0773695	1	0	0	0	0	OoMur
12447	8.74605	10.01	10.0465	8.96815	8.50554	2.402	1.026	-2.112	-1.378	-2.91	1.40655e-06	0.91116	8.13569e-05	0.0864502	5.29691e-07	1	1	1	1	1	Oo
12448	6.23794	7.63889	8.41566	6.60618	5.3872	2.641	1.713	-3.505	-2.328	-8.159	3.286e-05	0.0208621	1.99366e-05	0.00298644	1.30378e-08	1	1	1	1	1	Oo
12449	6.71611	7.28738	7.10196	6.96165	7.27653	1.486	-1.137	-1.102	1.244	1.129	0.000912744	0.341767	0.516601	0.1266	0.321866	1	0	1	1	1	Oo
12450	7.40901	5.94995	5.69579	5.18416	5.17851	-3.571	-1.19733	-1.44667	0.322667	-1.517	0.309005	0.445714	0.199446	0.462319	0.336994	1	0.666667	0.333333	0.333333	0.333333	Oo
12452	7.83983	7.49377	7.66427	7.32269	7.59645	-1.271	1.125	-1.267	1.209	-1.048	0.054544	0.458111	0.133191	0.256984	0.758104	1	1	1	1	1	OoMur
12453	10.3331	8.27576	7.41848	7.59234	7.40941	-4.28933	-1.828	1.12867	-0.495333	0.324667	1.07532e-08	0.00188441	0.49088	0.340446	0.364048	1	1	1	1	1	Oo
12454	5.98678	5.80031	5.10675	5.17258	5.54987	-1.138	-1.617	1.047	1.299	1.36	0.309159	0.00391132	0.816589	0.12528	0.0339245	1	0	0	0	1	Oo
12455	9.94538	8.12365	7.89853	7.4771	6.81688	-3.535	-1.169	-1.339	-1.58	-2.116	1.79127e-07	0.481895	0.155552	0.0469449	0.0002929	1	1	1	0	0	Oo
12457	10.184	11.2499	11.3654	11.4117	11.4694	2.093	1.083	1.033	1.041	1.075	1.92047e-09	0.344344	0.752446	0.698948	0.346377	1	1	1	1	1	Oo
12461	10.8388	10.083	9.93505	9.78409	9.71942	-1.74367	-0.453	-1.112	-0.389333	-0.516333	0.0334931	0.661675	0.531918	0.330951	0.090678	1	1	1	1	1	Oo
12462	10.0192	9.32885	9.66552	9.96827	9.69096	-1.67025	1.27825	0.78875	-1.2215	0.04425	0.0188984	0.296219	0.324702	0.481799	0.201202	1	0.75	1	1	1	Oo
12464	8.86183	8.04427	8.28835	8.1234	7.81167	-1.6325	0.863	-0.471	-1.25483	-1.12617	0.00456579	0.398297	0.418926	0.405427	0.271266	0.833333	0.833333	0.833333	0.833333	0.833333	Oo
12465	10.4752	11.0886	11.3009	11.3767	11.2826	1.53	1.159	1.054	-1.067	-1.013	2.45674e-05	0.131405	0.656319	0.584946	0.903704	1	1	1	1	1	Oo
12466	10.7202	9.02919	8.39608	7.54045	6.95635	-3.2705	-1.559	-1.8825	-1.5135	-2.957	3.86642e-09	0.0045797	0.00801647	0.0271115	2.0721e-05	1	1	1	1	1	Oo
12468	9.60131	8.4828	8.12239	7.78224	7.85238	-2.335	-1.287	-1.2665	0.0645	-0.245	0.000207739	0.190699	0.146044	0.0928455	0.345325	1	1	1	1	1	Oo
12469	9.35681	9.17417	8.94276	8.6616	8.93606	-1.135	-1.174	-1.215	1.21	-1.005	0.293147	0.287426	0.214127	0.245781	0.976511	1	1	1	1	1	Oo
12476	8.58458	8.47081	8.26238	8.37857	8.41717	-0.1225	-0.6645	0.58625	0.029	0.62075	0.0577338	0.39983	0.590318	0.684801	0.389894	1	0.75	0.75	1	1	Oo
12479	5.19604	2.83141	3.34608	6.62817	6.01422	-5.15	1.429	9.728	-1.53	6.356	0.000377814	0.495823	0.00011572	0.458783	0.00035614	0	1	0	1	1	Oo
12482	5.50401	5.60972	6.60298	8.22328	8.24753	1.076	1.9945	3.0745	0.019	3.156	0.669655	0.00699452	6.65083e-05	0.615584	7.99901e-06	1	0.5	1	1	1	Oo
12483	5.93432	6.41674	5.99814	6.42597	6.62238	1.397	-1.337	1.345	1.146	1.541	0.142032	0.309513	0.326837	0.699556	0.0909575	0	1	0	0	0	Oo
12488	6.70726	6.78682	7.00933	7.42129	7.64416	0.401333	1.17033	1.359	0.512	0.97	0.217831	0.366619	0.290769	0.315922	0.321112	1	1	1	1	1	Oo
12491	5.89096	5.66708	5.93322	5.62591	5.58875	-0.575333	1.209	-1.24767	-0.359333	-0.641333	0.158515	0.392196	0.342719	0.391935	0.0961818	0.666667	0.666667	1	0.333333	0.666667	OoCcMur
12492	6.36121	6.75137	5.69072	4.29673	3.94366	1.311	-2.086	-2.628	-1.277	-3.357	0.431061	0.0774287	0.0256958	0.635335	0.00325022	1	0	0	0	0	Oo
12495	6.21888	5.65764	6.85892	7.73437	7.848	-1.476	2.299	1.835	1.082	1.985	0.00067482	2.08413e-06	6.68836e-05	0.605645	6.02188e-06	0	0	0	1	1	OoMur
12496	5.92754	7.55921	7.40904	6.2084	6.15032	3.099	-1.11	-2.298	-1.041	-2.393	2.0955e-07	0.592659	0.000102287	0.870019	2.30555e-05	1	0	1	0	0	Oo
12497	8.00846	8.58076	8.66558	8.32129	8.4192	1.487	1.061	-1.27	1.07	-1.186	0.000140347	0.619459	0.0315435	0.607059	0.0834282	1	0	1	1	1	Oo
12499	6.15769	6.46671	6.45883	6.68035	6.84367	0.590667	-0.338667	1.172	1.12267	1.307	0.317134	0.775748	0.517836	0.664323	0.15114	1	0.333333	1	0.666667	1	OoMur
12507	5.15796	5.84673	6.24203	6.36576	6.87045	1.612	1.315	1.09	1.419	1.546	0.000501123	0.0623892	0.623749	0.0351727	0.00278129	0	0	1	1	1	Oo
12509	7.07913	6.45578	6.33989	6.82526	6.62396	-1.54	-1.084	1.4	-1.15	1.218	0.0071383	0.703855	0.0804596	0.531522	0.252312	1	1	1	1	1	OoMur
12514	4.16165	4.1537	4.41702	4.65298	4.86987	-1.006	1.2	1.178	1.162	1.369	0.98219	0.559728	0.632328	0.677228	0.236219	0	0	0	0	1	OoMur
12515	5.11147	5.89542	6.41595	7.72629	7.31324	1.722	1.434	2.48	-1.331	1.863	0.00877511	0.146298	0.000709461	0.348166	0.00754573	0	0	0	1	1	Oo
12520	6.67609	6.25052	5.12565	5.13937	5.47685	-1.343	-2.181	1.01	1.264	1.276	0.1609	0.00441031	0.978548	0.434253	0.311074	1	1	0	0	0	Oo
12525	5.69847	5.27205	5.60965	5.50161	5.79593	-1.349	1.2645	-0.0865	1.2295	0.16	0.112493	0.307028	0.620525	0.44467	0.405948	0	0.5	0	0.5	0.5	Oo
12527	7.98998	9.43037	9.47148	8.47017	7.79964	2.714	1.029	-2.002	-1.592	-3.186	2.48654e-06	0.905732	0.00107363	0.0303036	1.90475e-06	1	0	1	1	1	Oo
12530	8.09962	8.73665	8.75795	9.09908	9.09906	1.556	0.0155	1.2715	0	1.279	0.000297648	0.806054	0.126834	0.113368	0.233284	1	0.5	1	1	1	OoMur
12531	7.49893	8.29787	7.93506	8.20677	8.41647	1.74	-1.286	1.207	1.156	1.396	0.000129097	0.0891209	0.234211	0.396014	0.0171108	1	1	1	1	1	Oo
12532	7.49237	7.04921	7.313	7.72529	7.78422	-1.36	1.201	1.331	1.042	1.386	0.0048575	0.155411	0.0257394	0.840791	0.00687647	1	0	1	1	1	Oo
12534	10.2824	10.2089	10.3219	10.1071	9.85636	-1.052	1.081	-1.161	-1.19	-1.381	0.547005	0.471096	0.167271	0.121238	0.00169219	1	1	1	1	1	Oo
12537	8.66942	9.33667	8.8747	8.80873	8.8391	1.588	-1.377	-1.047	1.021	-1.025	0.000187196	0.0153002	0.775493	0.90696	0.855291	1	1	1	1	1	Oo
12539	7.88853	7.40511	7.26861	7.40419	7.3344	-1.398	-1.099	1.099	-1.05	1.047	0.0270553	0.637252	0.666158	0.846965	0.80702	1	0	0	0	0	Oo
12540	9.28559	8.21013	8.14053	8.23794	8.42	-2.146	0.278	0.407667	1.13533	1.22033	2.01284e-05	0.595718	0.330908	0.437078	0.270659	0.666667	1	0.666667	0.666667	0.666667	OoMur
12544	6.29542	7.45173	7.71479	7.75807	8.0456	2.229	1.2	1.03	1.221	1.258	2.54139e-07	0.151341	0.853076	0.153261	0.0514706	1	0	1	1	1	Oo
12545	8.60808	7.94228	8.26005	8.00917	7.94676	-1.586	1.246	-1.19	-1.044	-1.243	2.75368e-05	0.0410149	0.119995	0.756206	0.0296814	1	1	1	1	1	Oo
12550	7.2729	8.12851	8.43598	8.80712	9.4772	1.81	1.238	1.293	1.591	2.058	3.36999e-06	0.0644264	0.031279	0.00165461	1.43304e-06	1	1	1	1	1	Oo
12555	4.01549	4.74208	4.6967	5.21386	5.45435	1.655	-1.032	1.431	1.181	1.691	0.0336582	0.932456	0.235174	0.634129	0.045331	0	0	0	0	1	OoCc
12558	3.90315	5.29706	6.80448	7.72652	7.65461	3.125	2.9315	1.9125	-0.0565	1.8635	0.000201459	5.27989e-06	0.000788617	0.471806	0.00127455	0.5	0	1	1	1	OoCc
12561	5.53591	6.14914	6.31093	6.67634	6.38916	1.5345	1.119	1.2885	-0.2675	0.0725	0.0457971	0.692727	0.359753	0.461495	0.239911	0.5	0	0.5	0.5	1	Oo
12566	5.27057	7.11077	6.61058	5.91927	6.05638	3.581	-1.414	-1.615	1.1	-1.468	1.63093e-09	0.0152435	0.001779	0.575415	0.00460434	1	1	1	1	1	Oo
12567	5.35009	5.32698	5.84842	5.50739	5.58234	-1.016	1.435	-1.267	1.053	-1.203	0.953276	0.256076	0.512041	0.90601	0.542853	0	0	0	0	1	Oo
12568	6.97085	7.33874	7.92291	7.83285	8.0568	1.29	1.499	-1.064	1.168	1.097	0.108455	0.0382464	0.798176	0.499177	0.626851	1	0	1	1	1	Oo
12572	7.12232	7.6097	7.99756	8.1871	8.12304	0.607	1.3205	1.1445	-1.046	0.097	0.0259266	0.18532	0.473559	0.811754	0.50006	1	0.5	1	1	1	OoCcMur
12576	6.51722	5.84668	5.75393	5.66522	5.63969	-1.6025	-1.0675	-0.067	-0.0285	-0.1175	0.0333758	0.804203	0.752725	0.0447409	0.0711399	0.5	1	0.5	0.5	1	Oo
12577	7.36929	6.73283	6.6797	6.68466	6.33831	-1.555	-1.038	1.003	-1.271	-1.267	0.0336456	0.907	0.991499	0.401956	0.30687	1	1	1	0	1	OoMur
12578	5.45813	4.74816	4.74378	3.12585	4.20691	-1.636	-1.003	-3.069	2.116	-1.451	0.144899	0.995385	0.0098842	0.098774	0.33641	0	1	0	0	0	Oo
12580	6.22401	7.37126	7.12028	7.14636	6.95365	2.215	-1.19	1.018	-1.143	-1.122	2.32128e-07	0.16564	0.914689	0.348068	0.326035	1	1	1	1	1	Oo
12583	6.98578	10.1847	10.3404	9.78307	9.62253	9.183	1.114	-1.472	-1.118	-1.645	8.13079e-14	0.389982	0.00297395	0.423358	0.00014027	1	1	1	1	1	Oo
12585	6.91596	9.02119	10.1645	10.372	10.3866	4.303	2.209	1.155	1.01	1.166	8.71981e-12	8.86961e-07	0.214924	0.947298	0.125262	1	1	1	1	1	Oo
12589	7.29551	8.13874	7.93953	7.78345	8.09922	1.8925	-1.1485	-1.119	1.25	1.1175	0.0128945	0.395007	0.555955	0.296923	0.447951	1	1	1	1	1	Oo
12593	9.18458	8.57419	8.91295	8.99338	8.85194	-1.565	1.2645	1.0575	-0.127	-0.0535	0.00850268	0.10061	0.690854	0.225608	0.122185	1	1	1	1	1	Oo
12607	8.53567	7.59191	7.63145	7.70672	7.82931	-1.924	1.028	1.054	1.089	1.147	0.000142312	0.902052	0.816113	0.705646	0.413344	1	1	1	1	1	Oo
12608	6.48453	7.53201	7.48527	6.85938	6.76995	2.067	-1.033	-1.543	-1.064	-1.642	1.71064e-06	0.84158	0.00286338	0.717141	0.00042511	1	1	1	1	1	OoCc
12609	4.01033	5.98288	6.6224	5.62852	4.94192	3.925	1.558	-1.992	-1.609	-3.205	1.27537e-07	0.0328667	0.00225947	0.0400541	4.71015e-06	1	0	1	1	1	Oo
12611	7.50957	7.83266	7.73605	7.97778	7.89662	1.257	-0.0815	1.184	-0.0615	0.129	0.063547	0.142994	0.244325	0.52139	0.404618	1	1	1	1	1	OoCcMur
12614	5.30705	7.70793	8.10491	7.42418	7.51472	5.281	1.317	-1.603	1.065	-1.505	4.26103e-09	0.156744	0.0198135	0.809241	0.0245383	1	0	1	1	1	OoMur
12615	7.73454	8.86553	9.00199	9.20783	8.79368	2.19	1.099	1.153	-1.333	-1.155	2.81051e-07	0.478793	0.290922	0.0414581	0.212787	1	1	1	1	1	Oo
12617	7.55513	7.6475	7.73426	7.8731	7.74159	1.066	1.062	1.101	-1.095	1.005	0.542155	0.672139	0.508996	0.553704	0.970049	1	1	1	1	1	Oo
12626	8.06278	8.09143	7.69736	7.50361	7.60337	1.02	-1.314	-1.144	1.072	-1.067	0.863956	0.0421815	0.360471	0.681027	0.621267	1	1	1	1	1	Oo
12630	5.71793	5.53343	6.02876	6.75653	6.24693	-1.136	1.41	1.656	-1.424	1.163	0.23086	0.0112685	0.000674745	0.0187782	0.210282	0	1	0	1	1	Oo
12631	9.13214	9.10548	8.91513	8.97572	9.20684	-0.0235	-1.1455	1.043	1.1755	1.2255	0.0534108	0.421832	0.729204	0.244543	0.0735896	0.5	0.5	0.5	0.5	1	Oo
12632	8.96448	8.82147	8.46004	8.53057	8.33273	-1.105	-1.2885	0.052	-0.18	-0.123	0.422019	0.10777	0.680839	0.189905	0.0215047	1	1	1	1	1	Oo
12638	2.17081	2.04554	3.03557	5.10766	5.36888	-1.091	1.986	4.205	1.198	5.04	0.866104	0.255025	0.0202684	0.822158	0.0051134	0	0	0	1	1	Oo
12649	9.01431	10.1725	10.2493	10.4186	10.5477	2.47867	0.390667	1.125	0.434667	1.23967	0.000826509	0.5715	0.544589	0.653033	0.318905	1	1	1	1	1	OoCc
12651	7.52557	6.61622	6.47197	6.10049	5.68349	-1.878	-1.105	-1.294	-1.335	-1.727	7.53003e-07	0.379317	0.0228622	0.0207065	1.90947e-05	1	0	1	0	0	Oo
12652	6.71951	8.03785	8.21883	8.05998	7.91575	2.494	1.134	-1.116	-1.105	-1.234	7.81515e-07	0.454161	0.550344	0.607563	0.149801	1	0	1	1	1	Oo
12659	6.16702	5.44612	5.7059	5.65234	5.80522	-1.648	1.197	-1.038	1.112	1.071	0.0001203	0.176237	0.825243	0.502143	0.598448	1	1	1	1	1	Oo
12660	6.93091	5.6875	5.55391	5.45991	5.39949	-2.3695	-0.1025	-1.069	-0.0455	-0.1225	0.000535151	0.768172	0.860483	0.842014	0.646223	0.5	1	0	0	0.5	Oo
12662	8.57042	7.70644	7.47907	6.79965	5.98638	-1.82	-1.171	-1.601	-1.757	-2.814	0.00856355	0.621095	0.0845951	0.0679404	0.000236143	1	1	1	1	0	Oo
12663	6.14088	7.0027	6.98069	5.86983	5.62681	1.817	-1.015	-2.16	-1.183	-2.556	0.10693	0.981041	0.096684	0.814748	0.027149	1	0	1	0	0	Oo
12669	8.57382	8.09088	7.89858	8.05977	7.79408	-1.398	-1.143	1.118	-1.202	-1.075	0.0104168	0.431934	0.534878	0.338585	0.65527	1	1	1	1	1	Oo
12675	7.3361	5.78223	5.93039	5.57185	5.08252	-3.29667	0.459333	-1.28767	-0.923333	-1.95033	0.011394	0.4927	0.39282	0.547263	0.111983	0.333333	0.666667	0.666667	0.666667	0.666667	OoMur
12677	6.00341	6.95248	6.90532	6.47127	6.469	1.931	-1.033	-1.351	-1.002	-1.353	1.70612e-05	0.853835	0.0472174	0.99329	0.0270534	1	1	1	1	1	Oo
12686	5.03984	5.25882	5.18394	5.24167	5.52987	1.164	-1.053	1.041	1.221	1.271	0.42812	0.853835	0.896	0.465425	0.267597	1	1	1	1	1	Oo
12695	6.60506	8.11396	7.91611	8.10742	8.22374	3.51733	-0.494	0.494	0.419667	0.610667	0.000158037	0.146872	0.0967924	0.553021	0.0544067	1	0.666667	1	1	1	OoCcMur
12696	6.80174	7.61805	7.47162	7.09507	6.71849	1.761	-1.107	-1.298	-1.298	-1.685	0.000708197	0.611328	0.17199	0.192014	0.00338254	1	1	1	1	1	Oo
12700	7.12268	6.76886	6.51917	6.85789	6.72482	-1.278	-1.189	1.265	-1.097	1.153	0.0162299	0.148932	0.0591891	0.520996	0.198883	1	1	1	0	1	OoCcMur
12702	3.79217	6.04897	7.53681	6.80512	6.46848	4.779	2.805	-1.661	-1.263	-2.097	8.88754e-07	0.000853854	0.0740412	0.468561	0.00529658	1	0	1	1	1	OoMur
12704	9.40266	11.0093	10.7369	10.5358	10.4723	3.045	-1.208	-1.15	-1.045	-1.201	8.06463e-09	0.186177	0.357224	0.843258	0.154839	1	1	1	1	1	Oo
12709	9.88532	10.8271	10.5036	9.9408	9.6314	1.921	-1.251	-1.477	-1.239	-1.83	1.03839e-06	0.0528308	0.0021104	0.0924024	1.1727e-05	1	1	1	1	1	Oo
12725	6.12074	5.81646	5.6216	6.37936	6.07483	-1.23567	-0.497	1.235	-1.253	0.883667	0.292172	0.307719	0.178661	0.49526	0.00301755	1	1	0.666667	0.666667	0.666667	Oo
12727	4.28229	5.41747	5.37992	4.25869	4.16281	2.196	-1.026	-2.175	-1.069	-2.325	0.000937248	0.938445	0.00520757	0.855003	0.00133969	1	0	1	0	0	OoCc
12728	8.04256	7.92229	8.25173	8.26334	8.34957	-0.44	1.264	0.342667	0.396667	-0.222333	0.0326641	0.234706	0.366242	0.106968	0.281955	0.666667	0.666667	1	0.666667	0.666667	Oo
12729	9.27893	8.90458	8.79488	8.90989	8.89411	-1.304	-1.079	1.08333	0.321	0.406333	0.08051	0.540277	0.551784	0.631844	0.555059	1	0.666667	1	1	1	Oo
12740	5.01849	7.02889	6.47326	6.25489	6.18539	4.029	-1.47	-1.163	-1.049	-1.221	1.32411e-07	0.0667762	0.534543	0.869597	0.310419	1	0	0	0	0	Oo
12747	9.2965	9.8662	9.93146	9.98133	9.95724	1.484	1.046	1.035	-1.017	1.018	0.000341624	0.736521	0.81504	0.917839	0.88527	1	1	1	1	1	Oo
12748	8.41992	8.84902	8.60398	8.41279	8.76954	1.346	-1.185	-1.142	1.281	1.122	0.000254955	0.0475428	0.138639	0.0127086	0.144226	1	1	1	1	1	Oo
12750	5.33176	5.0601	5.32798	4.94407	5.04408	-1.207	1.204	-1.305	1.072	-1.217	0.0785143	0.15209	0.0477098	0.670828	0.0996271	1	0	1	0	1	Oo
12751	6.72725	4.28457	4.05663	4.56751	5.4851	-5.476	-1.173	1.4255	2.005	2.8295	0.00157789	0.514568	0.355718	0.132175	0.0210815	0	1	0	0	0	Oo
12752	7.87611	6.29642	6.59099	6.34821	6.58413	-2.989	1.227	-1.183	1.178	-1.005	0.000155604	0.558295	0.645449	0.713691	0.989397	0	1	0	0	0	OoCcMur
12753	5.82994	6.51612	6.5426	6.69937	6.80876	1.7675	1.019	0.1375	0.0985	1.2035	0.358774	0.899807	0.268573	0.116885	0.165936	0.5	1	0.5	1	0.5	Oo
12757	9.80546	10.4319	10.3752	10.351	9.93577	1.5625	-0.041	-0.0185	-1.338	-1.3565	0.000545858	0.704158	0.481464	0.0666582	0.00539552	1	1	1	1	1	Oo
12764	10.2159	10.2618	10.1445	9.95222	9.69008	1.032	-1.085	-1.143	-1.199	-1.37	0.661115	0.367941	0.143625	0.0596988	0.000510059	1	1	1	1	1	Oo
12766	6.14203	6.2604	6.56108	7.17307	7.81229	1.086	1.232	1.528	1.557	2.38	0.488957	0.145921	0.00568497	0.0090768	2.20181e-06	1	1	1	1	1	Oo
12769	7.14695	7.0497	6.51174	6.87257	6.86385	-1.07	-1.452	1.284	-1.006	1.276	0.835487	0.368104	0.578465	0.994431	0.529032	0	1	0	0	0	Oo
12770	6.11079	5.80493	5.72767	5.72767	5.70135	-1.236	-1.055	1	-1.018	-1.018	0.125979	0.787467	0.999988	0.938204	0.920001	0	0	0	0	1	Oo
12778	3.35469	5.05249	6.03256	5.6426	5.52854	3.244	1.973	-1.31	-1.082	-1.418	8.43507e-05	0.0268722	0.426427	0.851988	0.211508	0	0	1	0	1	OoCcMur
12785	9.21656	9.58767	9.66227	9.58593	9.51034	0.341	0.0595	-0.0635	-0.061	-0.1475	0.463669	0.38605	0.288246	0.398435	0.0848622	1	1	1	1	1	Oo
12793	9.63318	10.2194	10.4883	10.663	10.609	1.501	1.205	1.129	-1.038	1.087	9.4741e-05	0.0772603	0.287019	0.790207	0.402608	1	1	1	1	1	Oo
12805	5.33299	5.96681	6.46486	7.15169	7.33524	1.78233	0.831	1.66133	1.14	1.93133	0.422426	0.18148	0.231974	0.486192	0.208344	0.666667	0.333333	1	1	1	Oo
12807	7.35292	7.49376	7.46177	7.53569	7.67293	1.103	-1.022	1.053	1.1	1.158	0.192605	0.84158	0.640587	0.362197	0.0825462	1	1	1	1	1	Oo
12808	6.80308	6.91115	8.1868	8.73205	8.69403	1.078	2.421	1.459	-1.027	1.421	0.71259	0.000933085	0.128436	0.957426	0.117979	0	0	0	0	1	OoCcMur
12812	7.62383	7.16526	6.73853	6.09013	5.80682	-1.374	-1.344	-1.567	-1.217	-1.908	0.00183078	0.0117759	0.000533455	0.11557	4.44672e-06	1	0	1	0	0	OoCc
12817	4.68639	4.342	5.07054	6.40239	6.03396	-1.27	1.657	2.517	-1.291	1.95	0.368856	0.117974	0.00730447	0.507906	0.0273637	0	0	0	1	1	Oo
12818	5.31348	5.61252	5.51932	5.75652	5.95259	1.23	-1.067	1.179	1.146	1.35	0.154721	0.751962	0.406509	0.523824	0.0667214	1	1	1	1	1	Oo
12823	6.67316	5.65576	6.35395	6.13377	6.83302	-2.024	1.622	-1.165	1.624	1.394	0.000916828	0.0405835	0.579812	0.0740011	0.128441	0	0	0	0	1	Oo
12825	4.50077	2.06344	3.53307	3.3395	3.27217	-5.416	2.77	-1.144	-1.048	-1.198	0.000226027	0.0346362	0.824798	0.944307	0.705496	0	1	0	0	0	Oo
12826	6.80146	5.91415	6.0996	7.21015	6.94462	-1.85	1.137	2.159	-1.202	1.796	0.000135357	0.464362	0.00011545	0.32714	0.000647072	1	1	1	1	1	Oo		12826	col4a1
12827	5.64026	5.90333	6.26049	6.38622	6.46032	1.2	1.281	1.091	1.053	1.149	0.081356	0.0517934	0.555982	0.755874	0.238743	1	0	1	1	1	Oo		12827	col4a2
12830	5.58126	3.37177	3.5491	4.61962	3.91213	-4.625	1.131	2.1	-1.633	1.286	2.9498e-07	0.653838	0.00491754	0.0726545	0.271457	0	1	0	1	1	OoCcMur		12829	col4a4
12831	5.47515	4.84045	4.90983	5.01906	4.92913	-1.553	1.049	1.079	-1.064	1.013	0.00589012	0.827378	0.740088	0.800287	0.945531	0	0	0	0	1	Oo		12830	col4a5
12835	7.35139	7.78196	7.62146	7.68981	8.09156	1.348	-1.118	1.049	1.321	1.385	0.0568531	0.592467	0.84364	0.182056	0.0615009	1	1	1	1	1	Oo		94216	col4a6
12836	6.20609	5.69745	5.28025	5.51171	5.97521	-1.423	-1.335	1.174	1.379	1.619	0.0825051	0.246832	0.579667	0.240503	0.0355799	0	1	0	0	0	Oo
12841	6.54099	6.03111	5.76487	5.31517	4.6157	-0.6185	-1.2105	-1.3705	-0.8895	-2.4875	0.275491	0.620973	0.345463	0.396338	0.0666999	1	0.5	0.5	0	0.5	Oo
12846	7.32632	6.26086	5.87983	5.71869	5.9088	-2.093	-1.302	-1.118	1.141	1.02	3.99025e-05	0.135581	0.592508	0.537828	0.916239	1	1	0	0	0	Oo		16772	lama1
12848	7.37475	7.62967	8.10042	8.15625	8.40669	0.2745	1.435	0.044	1.19	1.2425	0.0121557	0.353198	0.419016	0.273971	0.195065	1	1	1	1	1	Oo		16777	lamb1
12850	8.9838	8.72026	8.18279	8.03037	7.65791	-1.2	-1.451	-1.111	-1.295	-1.439	0.146404	0.0176771	0.55467	0.125176	0.0126499	1	1	1	1	1	Oo		226519	lamc1
12856	10.1227	9.44479	9.61621	9.74066	9.84321	-1.6	1.126	1.09	1.074	1.17	2.53383e-06	0.18484	0.380427	0.502795	0.0562796	1	1	1	1	1	Oo
12857	11.0043	10.578	10.2201	10.1365	10.1222	-1.344	-1.282	-1.06	-1.01	-1.07	0.00168607	0.0198528	0.644345	0.945877	0.497862	1	1	1	1	1	Oo
12858	11.0269	10.2678	10.2464	10.4077	10.7719	-1.25967	-0.348333	1.11867	1.317	1.47433	0.241607	0.898952	0.465764	0.304424	0.0352259	1	1	1	1	1	Oo
12859	11.0788	10.7129	10.486	10.3741	10.3563	-1.2905	-1.17125	-1.08175	-0.0135	-0.59675	0.0263976	0.199434	0.571111	0.4529	0.482054	1	1	1	1	1	Oo
12861	11.2777	10.4299	10.1831	10.2578	10.2679	-1.8035	-1.187	1.053	0.0075	0.064	8.55515e-06	0.183237	0.69294	0.566201	0.476449	1	1	1	1	1	Oo
12862	5.9869	5.86306	6.86734	7.57879	7.66145	-1.09	2.006	1.637	1.059	1.734	0.528149	0.000288451	0.00512133	0.793467	0.00104089	0	0	0	1	1	Oo
12864	10.8285	10.6227	10.1099	9.87204	9.73829	-0.1915	-1.4315	-0.196	-0.1165	-0.387	0.0626582	0.0120759	0.496777	0.208155	0.142398	1	1	1	1	1	Oo
12866	10.964	10.507	10.443	10.3755	10.3699	-1.384	-1.046	-1.048	-0.004	-1.053	0.0179121	0.715978	0.717058	0.710599	0.654671	1	1	1	1	1	Oo
12867	10.0936	10.3393	10.1271	9.75062	9.54422	1.186	-1.158	-1.298	-1.154	-1.498	0.182059	0.365414	0.108046	0.430224	0.00713437	1	1	1	1	1	Oo
12874	6.30538	6.68166	6.77328	6.85636	6.76613	1.36867	-0.257667	0.394667	-0.415	0.315667	0.501809	0.573273	0.730485	0.389873	0.182663	1	0.666667	1	1	1	OoCc
12877	9.96314	10.7278	10.3208	10.2937	10.5816	1.699	-1.326	-1.019	1.221	1.198	1.4291e-06	0.00565592	0.880709	0.0625688	0.0428408	1	1	1	1	1	Oo
12892	6.19054	6.6147	5.99057	6.1815	6.12647	1.342	-1.5415	1.1455	-0.045	0.1205	0.0656784	0.0466084	0.476277	0.430209	0.270261	1	1	0.5	1	1	OoMur
12894	6.92437	5.4161	5.47929	5.6436	5.88558	-2.845	1.045	1.121	1.183	1.325	2.1196e-06	0.853835	0.625036	0.467111	0.118215	1	1	0	0	1	OoCc
12896	6.82398	7.04976	7.34875	7.49369	7.34201	0.2395	1.2305	0.118	-1.1125	-0.006	0.0461167	0.246028	0.483994	0.619002	0.193837	0.5	0	1	0.5	1	OoCcMur
12904	1.47662	6.00873	7.02486	7.93345	7.7277	23.137	2.022	1.877	-1.153	1.628	1.83661e-12	0.00211847	0.00506374	0.577916	0.0142082	0	0	0	1	1	Oo
12909	7.6565	7.87258	8.15721	7.94844	7.17399	1.162	1.218	-1.156	-1.711	-1.977	0.242952	0.212571	0.408694	0.00479277	9.08845e-05	1	1	1	1	1	Oo
12912	6.82043	6.76618	6.712	6.40076	6.00639	-0.069	-0.041	-1.242	-1.33	-1.641	0.0030973	0.735009	0.352758	0.367445	0.0425595	0.5	0.5	0.5	0.5	0.5	OoCcMur
12913	7.72571	7.94736	8.05041	7.62923	7.28127	0.224	1.074	-1.345	-1.2725	-1.7125	0.111172	0.6527	0.208078	0.190135	0.0165126	1	0.5	1	1	1	Oo
12914	10.584	9.92833	9.77192	9.83034	9.42561	-1.227	-0.61925	0.54275	-0.463	-0.82675	0.000784601	0.0736306	0.378665	0.336331	0.165416	1	1	1	1	1	Oo
12915	4.80335	5.19471	4.30221	4.36485	4.08349	1.312	-1.856	1.044	-1.215	-1.164	0.278718	0.0448643	0.916177	0.605887	0.616227	1	0	0	0	0	Oo
12916	5.78254	5.30488	5.435	5.35304	5.48226	-1.392	1.094	-1.058	1.094	1.033	0.0222166	0.636772	0.791677	0.678853	0.855392	1	1	1	0	1	Oo
12927	7.26575	7.03666	7.51583	7.49959	7.59871	-0.1905	1.3955	-0.012	1.0735	1.059	0.468378	0.0894574	0.796168	0.765932	0.770158	1	1	1	1	1	OoMur
12928	7.14055	7.34379	7.30359	7.32986	7.54325	0.67425	-0.04	0.02025	0.68025	0.6905	0.161197	0.533085	0.607631	0.582046	0.333787	1	0.75	1	0.75	1	OoCc
12929	6.88287	7.09419	6.99738	7.14158	7.13284	1.1575	-0.0785	0.124	-0.008	0.154	0.232828	0.362973	0.24281	0.104144	0.0012473	0.5	0	0.5	1	1	OoCc
12931	7.83213	7.83264	7.03684	7.7253	7.4824	1	-1.736	1.612	-1.183	1.362	0.998621	0.0304527	0.0684187	0.584979	0.185052	0	1	0	0	0	Oo
12945	2.95005	5.64422	7.4956	7.51932	7.23994	6.472	3.608	1.017	-1.214	-1.194	1.66557e-08	3.04197e-05	0.961122	0.49837	0.440161	0	0	1	1	1	OoCc
12946	7.96047	7.90883	8.25199	8.69557	8.70226	-1.036	1.269	1.36	1.005	1.366	0.788705	0.131724	0.0606634	0.983487	0.0338273	1	1	1	1	1	Oo
12952	6.70232	7.39637	7.63885	7.81153	7.86939	1.618	1.183	1.127	1.041	1.173	0.0050315	0.415249	0.605342	0.881999	0.388401	1	1	1	1	1	OoMur
12971	3.93899	6.11327	7.51635	6.56434	6.14925	4.514	2.645	-1.935	-1.333	-2.58	8.32028e-07	0.000978015	0.0161282	0.332404	0.000533942	0	0	1	0	0	Oo
12972	9.07709	5.87314	4.97299	5.25407	5.07805	-9.215	-1.866	1.215	-1.13	1.076	1.42667e-09	0.0118411	0.473559	0.686249	0.764741	1	1	1	1	1	Oo
12974	8.80232	9.40734	9.38709	9.5721	9.68493	0.955	0.309333	1.13767	0.423667	1.24767	0.0746634	0.263515	0.428552	0.496716	0.323435	1	1	1	1	1	Oo
12977	5.0403	6.44955	7.4233	7.60114	7.86637	2.656	1.964	1.131	1.202	1.359	1.46763e-05	0.00344391	0.630202	0.467094	0.120161	0	0	1	1	1	Oo
12978	6.78884	6.61571	6.42743	6.64669	6.10355	-1.128	-1.139	1.164	-1.457	-1.252	0.509708	0.589476	0.552579	0.118748	0.272432	1	1	1	1	1	Oo
12982	5.88654	5.43639	5.41284	4.97656	5.84896	-1.366	-1.016	-1.353	1.831	1.353	0.127372	0.961084	0.25867	0.0324599	0.189862	0	1	0	0	0	Oo
12988	6.29722	6.04451	5.89114	6.32588	6.43221	-1.191	-1.112	1.352	1.076	1.455	0.102689	0.441227	0.0263083	0.651705	0.00354076	0	0	0	1	1	Oo
12995	7.90983	7.4363	7.25953	7.56969	7.32811	-1.40725	-0.63625	1.24375	-0.70325	0.5515	0.0692996	0.414268	0.163656	0.380044	0.298118	1	1	1	1	1	Oo
13000	8.21307	8.37432	8.62794	8.48941	8.24617	0.458667	1.202	-0.446667	-0.543	-0.743667	0.344029	0.355597	0.0177539	0.1006	0.000109527	0.666667	0.666667	0.666667	0.666667	1	Oo
13001	9.26195	9.85106	9.82901	9.67922	9.74545	1.504	-1.015	-1.109	1.047	-1.06	0.000721241	0.928095	0.4858	0.792544	0.655446	1	0	1	1	1	Oo
13002	7.91128	7.14281	7.44875	7.3616	6.89885	-1.76	1.25467	0.265667	-1.386	-1.49533	0.0286845	0.330338	0.667487	0.0556244	0.0358804	1	1	1	1	0.666667	Oo
13006	7.06113	8.18244	8.01414	7.97314	8.08281	2.3665	-0.1365	-0.033	0.0835	0.06	0.00533868	0.491036	0.476746	0.687506	0.165823	1	0.5	1	1	1	Oo
13008	7.76855	6.32538	6.02673	6.02167	6.17471	-2.719	-1.23	-1.004	1.112	1.108	2.51984e-08	0.119421	0.984112	0.50284	0.417005	0	1	1	1	1	Oo
13010	8.83524	8.04028	8.14837	7.74146	7.23211	-1.735	1.078	-1.326	-1.423	-1.887	4.02082e-05	0.607163	0.0396263	0.0200591	3.12817e-05	1	0	1	1	1	Oo
13014	10.3792	9.33793	8.37799	7.74202	7.28886	-2.058	-1.945	-1.554	-1.369	-2.127	1.91861e-06	6.01958e-05	0.00261262	0.0377509	5.04201e-06	1	1	1	1	1	Oo
13017	7.75903	8.78993	9.1976	9.51523	9.64636	2.0625	1.329	1.247	1.096	1.3675	2.34944e-05	0.0448854	0.124485	0.571963	0.0294052	1	1	1	1	1	Oo
13018	8.10859	7.59625	8.04987	8.34507	8.19717	-0.5335	1.37	1.2275	-0.1455	0.14	0.366823	0.0186252	0.131913	0.0269725	0.066855	1	1	1	1	1	Oo
13019	5.68326	6.83229	7.23574	6.31946	5.91421	2.218	1.323	-1.887	-1.324	-2.499	1.70805e-05	0.113776	0.00130221	0.148452	1.36227e-05	0	0	1	0	0	Oo
13026	6.79485	6.56009	6.70186	7.41188	7.88181	-1.191	1.106	1.6375	1.391	2.268	0.509922	0.535714	0.00695712	0.161454	0.000198713	0.5	0.5	0.5	1	1	Oo
13030	7.33072	7.29904	7.41852	7.04534	6.87173	0.254333	0.426667	-0.717333	-1.13067	-0.968667	0.0775875	0.251744	0.137995	0.536937	0.119664	0.333333	0.666667	0.666667	0.333333	0.333333	Oo
13033	9.51184	9.38068	8.84583	8.21286	7.9185	-1.095	-1.449	-1.551	-1.226	-1.902	0.370284	0.00482418	0.00141764	0.132752	1.27613e-05	1	0	1	1	1	Oo
13034	5.82034	6.23564	6.2096	6.29108	6.07275	1.334	-1.018	1.058	-1.163	-1.099	0.0450492	0.935943	0.793961	0.452573	0.571923	1	1	1	1	1	Oo
13036	5.9143	9.19387	10.478	10.603	10.1815	10.1495	2.445	1.0905	-1.34	-1.2285	5.25157e-13	4.72355e-06	0.574105	0.0662775	0.106582	1	0.5	1	1	1	OoMur
13039	9.70509	6.95848	5.89288	5.69265	5.49403	-6.711	-2.093	-1.149	-1.148	-1.318	3.21383e-09	0.00195441	0.587334	0.607544	0.169177	1	1	1	1	1	Oo
13043	8.51527	7.74614	7.38672	6.13754	5.76755	-1.43033	-1.28567	-2.45033	-0.650333	-3.26567	0.165382	0.301945	0.0243952	0.34852	0.0153149	1	0.666667	0.666667	0.666667	0.666667	OoMur
13046	9.19346	9.16417	9.04819	8.83793	8.40792	-0.353	-1.088	-0.501333	-1.34767	-1.579	0.18708	0.640372	0.442724	0.0366911	0.0130132	1	1	1	1	1	Oo
13048	5.69613	7.08635	8.19172	8.13247	7.94405	2.621	2.152	-1.042	-1.14	-1.187	7.63092e-06	0.000714254	0.883477	0.64954	0.383442	1	0	1	1	1	Oo
13052	6.22605	7.20757	6.86564	6.15173	5.53508	2.4115	-1.2825	-0.846	-1.54	-2.969	0.437875	0.460164	0.499603	0.129978	0.0348986	1	0.5	1	0	0.5	OoCcMur
13056	7.55827	6.44288	5.91372	5.56951	5.48853	-2.167	-1.443	-1.269	-1.058	-1.343	1.20795e-07	0.00329407	0.046886	0.703159	0.00811592	0	1	0	0	0	Oo
13063	8.95372	8.48299	9.03058	8.99695	8.81785	-0.955333	1.48933	0.282333	-0.479	0.0616667	0.00200514	0.0975144	0.0884826	0.429241	0.216085	1	1	1	1	1	Oo
13067	6.92466	5.77766	5.78941	6.13961	6.22745	-2.215	1.008	1.275	1.063	1.355	7.65703e-06	0.971957	0.164085	0.779628	0.0474252	1	1	1	0	1	Oo
13070	5.7461	5.90928	7.32629	7.70532	7.77383	1.12	2.67	1.3	1.049	1.364	0.563007	0.000296584	0.30195	0.915576	0.157584	0	0	0	1	1	OoCcMur
13075	4.22898	5.55914	6.98908	8.34187	8.17731	2.514	2.694	2.554	-1.121	2.279	0.00059442	0.00181287	0.00287427	0.761968	0.00373012	0	0	1	1	1	OoCcMur
13089	4.86645	4.76299	5.95908	6.67793	6.44933	-1.074	2.291	1.646	-1.172	1.405	0.735263	0.00244504	0.0557516	0.607888	0.14242	0	0	0	0	1	Oo
13094	4.63858	4.9527	4.96992	4.62603	5.08027	1.243	1.012	-1.269	1.37	1.079	0.451027	0.980746	0.560275	0.441188	0.834091	1	1	0	0	1	Oo
13095	8.04418	8.35485	7.61734	7.38509	7.18658	1.24	-1.667	-1.175	-1.148	-1.348	0.153247	0.00797242	0.437554	0.535052	0.0780508	1	1	1	1	1	Oo
13097	6.02289	6.10307	6.38978	6.26232	6.46325	1.057	1.22	-1.092	1.149	1.052	0.752936	0.362084	0.733195	0.586386	0.815378	0	0	1	1	1	Oo
13106	5.33629	5.72085	5.13358	5.45018	5.50939	1.305	-1.502	1.245	1.042	1.298	0.0798786	0.0294381	0.26894	0.871832	0.1257	0	0	1	1	1	Oo
13107	8.42305	6.82701	6.37323	7.13784	7.01848	-3.023	-1.37	1.699	-1.086	1.564	4.86359e-10	0.00687031	8.42575e-05	0.533709	0.000182621	1	1	1	1	1	Oo
13112	5.63389	5.75199	5.4013	5.7163	6.27201	1.085	-1.275	1.244	1.47	1.829	0.687782	0.332738	0.422214	0.14777	0.00936488	1	0	0	1	1	Oo
13116	7.83683	7.52813	6.94824	6.58833	6.6316	-1.239	-1.495	-1.283	1.03	-1.245	0.0385998	0.00272865	0.0517031	0.862502	0.0549813	1	1	1	1	1	Oo
13120	5.3809	5.08988	5.43196	5.53631	5.60781	-1.223	1.268	1.075	1.051	1.13	0.154428	0.171108	0.735125	0.834742	0.459884	0	0	0	1	1	Oo
13122	5.14173	5.18603	4.72145	5.06911	5.2738	1.031	-1.38	1.272	1.152	1.466	0.907328	0.291501	0.47684	0.708471	0.164193	1	0	0	1	1	Oo
13123	4.86902	4.31402	5.17445	5.59596	5.38426	-1.469	1.816	1.339	-1.158	1.157	0.0547323	0.0160514	0.258781	0.621197	0.532158	0	1	0	0	1	OoCcMur
13131	5.78356	5.52308	5.71873	6.20999	6.09939	-1.2105	1.1455	0.511	-1.08	0.385	0.459811	0.576339	0.444648	0.788717	0.341785	0.5	0.5	1	1	1	OoCcMur
13132	4.98198	5.13228	5.8993	7.11573	7.26208	-0.192	1.631	2.371	0.452	2.73067	0.400663	0.0261851	0.000125213	0.0472995	0.000495818	0.333333	0.333333	0.333333	1	1	Oo
13135	11.0101	10.6976	10.3217	10.3139	10.2648	-1.2535	-1.298	-0.0055	-0.0385	-0.042	0.25263	0.0409004	0.634618	0.374329	0.606154	1	1	1	1	1	Oo
13136	8.25497	6.88501	7.02355	8.02538	8.08215	-2.60933	0.444667	2.01333	0.376333	2.11333	8.02259e-05	0.448246	0.00238385	0.743903	0.00190767	0.666667	1	0.666667	1	1	OoMur
13137	4.06989	4.09843	4.31057	3.88928	4.07599	1.02	1.158	-1.339	1.138	-1.177	0.917872	0.528163	0.202695	0.627581	0.427255	0	1	0	0	0	Oo
13138	7.17729	7.40533	7.28045	7.49281	7.59143	1.17625	-1.091	1.15975	0.08225	1.2555	0.4187	0.686299	0.508724	0.608371	0.352537	0.75	0.5	0.75	0.75	1	Oo
13143	5.64335	6.23751	6.55114	6.64298	6.57721	1.51	1.243	1.066	-1.047	1.018	0.00144559	0.127647	0.71768	0.812478	0.906936	0	0	1	1	1	Oo
13144	5.83986	6.32729	6.51524	6.20003	5.92451	1.402	1.139	-1.244	-1.21	-1.506	0.0394107	0.541073	0.303037	0.399722	0.0258016	1	0	1	1	1	Oo
13162	5.24362	5.17577	5.24461	5.10997	5.30962	-1.048	1.049	-1.098	1.148	1.046	0.740974	0.812676	0.644686	0.487627	0.795767	0	0	0	0	1	Oo
13163	8.11205	7.97803	8.55478	8.42912	8.26732	-1.097	1.491	-1.091	-1.119	-1.22	0.233639	0.000324982	0.414997	0.297781	0.0256566	1	1	1	1	1	Oo
13164	9.69769	9.83827	9.88058	9.9073	9.98508	0.1075	0.035	0.021	0.0635	1.076	0.515593	0.196527	0.475935	0.342832	0.577557	1	1	1	1	1	OoMur
13167	7.48851	7.00216	6.93339	7.29256	7.53401	-0.9965	-0.54775	0.815	0.69475	1.0935	0.240628	0.366677	0.346781	0.387094	0.107092	0.75	1	1	1	1	OoCc
13170	5.39924	5.05988	5.15872	5.33505	5.22817	-1.265	1.071	1.13	-1.077	1.049	0.365762	0.859245	0.7581	0.867136	0.886257	0	1	0	0	0	OoCcMur
13175	4.50486	4.6332	4.37645	4.52914	4.3331	1.093	-1.195	1.112	-1.146	-1.031	0.699819	0.552518	0.758276	0.69615	0.919278	0	0	0	0	1	OoMur
13177	7.6867	7.31699	7.09843	6.31797	6.13882	-1.292	-1.164	-1.718	-1.132	-1.945	0.013826	0.217682	0.000184322	0.37388	7.25483e-06	1	1	1	0	0	Oo
13178	6.27464	4.18957	4.15555	1.77203	1.28131	-5.3375	-0.0275	-5.802	-0.5145	-7.352	0.0368613	0.809082	0.0118516	0.561796	0.0002742	0	1	0.5	0	0	Oo
13179	6.39573	3.26676	3.64785	3.78157	4.09463	-8.748	1.302	1.097	1.242	1.363	6.54053e-05	0.664407	0.896542	0.75954	0.557773	0	1	0	0	0	Oo
13180	6.56283	9.41404	9.34726	8.85463	8.58847	7.216	-1.047	-1.407	-1.203	-1.692	3.56132e-12	0.773336	0.018289	0.229963	0.000343715	1	0	1	1	1	Oo
13191	6.48094	5.79547	5.18265	5.20233	5.6817	-1.608	-1.529	1.014	1.394	1.413	0.0468585	0.138848	0.972211	0.306205	0.192529	1	1	1	1	1	Oo
13196	7.96121	7.86183	7.3056	7.42825	7.53128	-1.071	-1.47	1.089	1.074	1.169	0.536728	0.00663594	0.591715	0.673289	0.208604	1	1	1	1	1	OoCcMur
13198	4.73174	6.47511	7.5307	7.83657	7.62364	3.348	2.079	1.236	-1.159	1.067	3.31149e-07	0.00091783	0.318191	0.531172	0.745513	1	0	1	1	1	OoCc
13200	9.48888	8.71354	8.05925	8.04046	7.94167	-1.712	-1.574	-1.013	-1.071	-1.085	1.60157e-05	0.00077146	0.936857	0.643513	0.473538	1	1	1	1	1	Oo
13202	8.44729	7.5527	7.38591	7.79416	7.70427	-1.859	-1.123	1.327	-1.064	1.247	0.000894274	0.606473	0.189964	0.821148	0.241934	0	0	0	0	1	Oo
13204	10.1338	9.28201	8.89111	8.58535	8.42661	-1.845	-1.3125	-1.2515	-1.1225	-1.428	0.000111196	0.0404952	0.396452	0.524363	0.353437	1	1	1	1	1	Oo
13205	9.49079	9.81015	9.96764	9.94361	10.1619	1.25533	0.460667	0.315667	1.167	1.14533	0.193564	0.432108	0.811465	0.404387	0.335944	1	0.666667	1	1	1	Oo
13206	9.72067	9.35948	9.17996	8.13829	7.58608	-1.284	-1.133	-2.059	-1.466	-3.019	0.0478511	0.438256	9.24655e-05	0.027027	2.48059e-07	1	1	1	1	1	Oo
13207	8.93712	8.27507	8.29537	7.97467	7.95284	-1.3776	0.2152	-0.8734	0.1802	-0.92	0.0167514	0.625442	0.220235	0.48567	0.240041	1	1	1	1	1	Oo
13209	9.19205	8.69215	8.4121	7.76759	6.97648	-1.01875	-0.7285	-1.602	-1.81875	-3.00475	0.174701	0.154194	0.171547	0.154129	0.0454615	1	0.75	1	0.5	0.5	Oo
13211	9.15029	7.78191	7.14806	7.14405	7.2503	-2.582	-1.552	-1.003	1.076	1.073	7.6492e-07	0.00992956	0.989564	0.726041	0.663112	1	1	1	1	1	Oo
13218	6.8363	8.47076	7.60137	7.61835	6.70517	3.105	-1.827	1.012	-1.883	-1.861	6.42369e-07	0.00365759	0.964193	0.00631011	0.0014658	1	1	1	1	1	Oo
13234	6.29178	6.00025	5.82372	6.18229	6.0672	-1.224	-1.13	1.282	-1.083	1.184	0.126155	0.47587	0.141959	0.69561	0.259735	1	1	1	1	1	Oo
13244	9.63386	10.1951	10.5482	10.8464	10.9957	1.5005	1.2975	1.2305	0.1215	1.3745	0.0406776	0.337136	0.0906118	0.394858	0.0798768	1	1	1	1	1	Oo
13349	5.76059	5.76351	5.41294	5.90357	5.94972	1.002	-1.275	1.405	1.033	1.451	0.99033	0.21532	0.0926874	0.906586	0.0395075	0	1	0	0	0	Oo
13350	7.80941	7.28823	7.38183	6.93276	6.71202	-1.435	1.067	-1.365	-1.165	-1.591	0.00063763	0.606127	0.00980186	0.226385	0.000175489	1	1	1	0	0	Oo
13353	6.25282	7.05026	7.44853	7.89844	7.59748	1.738	1.318	1.366	-1.232	1.109	0.0068753	0.247675	0.214033	0.449251	0.65888	1	0	1	1	1	Oo
13356	6.44714	6.84337	6.82634	6.79583	6.99676	1.316	-1.012	-1.021	1.149	1.125	0.00904183	0.940936	0.895442	0.313629	0.299905	1	0	0	0	1	OoMur
13358	9.98203	10.0188	9.7307	9.51053	9.51308	1.026	-1.221	-1.165	1.002	-1.163	0.782679	0.0737539	0.188473	0.994431	0.142525	1	1	1	1	1	Oo
13360	4.74429	5.85066	5.68412	5.45762	6.46947	2.153	-1.122	-1.17	2.016	1.724	0.00400225	0.74118	0.669149	0.0399551	0.0520737	0	0	0	0	1	OoCcMur
13361	7.68354	7.3002	7.42996	7.42894	7.20855	-1.3045	0.117	-0.0005	-1.166	-1.1665	0.030573	0.148034	0.982134	0.399885	0.285575	1	0.5	1	0.5	0.5	Oo
13367	7.15811	7.47962	7.81272	7.77744	7.8755	0.4045	0.3525	-0.0295	1.0705	0.0525	0.110999	0.103335	0.394878	0.800774	0.376767	0.5	1	0.5	0.5	0.5	Oo
13371	4.98218	5.24329	5.48632	5.8019	5.82585	1.198	1.183	1.245	1.017	1.265	0.344612	0.501372	0.400072	0.959922	0.280468	0	0	0	0	1	Oo
13382	7.36306	8.29291	8.4793	8.43015	8.5918	1.905	1.138	-1.035	1.119	1.081	1.48578e-05	0.383465	0.850311	0.506231	0.571923	1	1	1	1	1	Oo
13383	7.66905	7.00644	6.63343	6.87115	7.07136	-1.583	-1.295	1.179	1.149	1.355	0.00151322	0.105635	0.34841	0.460979	0.0413224	0	1	0	0	0	Oo
13384	6.10626	5.99964	5.7797	6.47286	6.24601	-1.077	-1.165	1.617	-1.17	1.382	0.744406	0.607163	0.0856084	0.637178	0.193499	0	0	0	1	0	OoMur
13386	7.09846	5.26159	4.96658	4.55294	4.45484	-3.572	-1.227	-1.332	-1.07	-1.426	4.45907e-05	0.541605	0.404179	0.872759	0.213552	0	1	0	0	1	Oo
13388	5.97323	5.89201	5.54301	5.41853	5.59853	-1.058	-1.274	-1.09	1.133	1.039	0.778356	0.32202	0.770588	0.676509	0.878069	0	1	0	0	0	Oo
13389	6.63751	6.32185	6.2477	6.26064	6.52777	-1.245	-1.053	1.009	1.203	1.214	0.132766	0.807708	0.970071	0.360519	0.237775	1	1	1	1	1	Oo
13394	5.68379	5.33771	5.31221	5.40056	5.15709	-1.271	-1.018	1.063	-1.184	-1.114	0.039423	0.921705	0.720972	0.281187	0.416233	0	1	0	0	0	Oo
13401	8.94229	9.74985	9.56469	9.43167	9.60871	1.75	-1.137	-1.097	1.131	1.031	0.000163086	0.4577	0.617387	0.557276	0.86426	1	0	1	1	1	Oo
13405	4.53047	4.96204	4.49523	4.85732	4.54937	1.352	-1.414	1.2865	-1.2435	0.0395	0.13827	0.320491	0.336586	0.490886	0.761793	1	0	0	0	0.5	OoCc
13406	3.11699	2.54399	3.19489	2.5808	3.87264	-1.488	1.57	-1.531	2.448	1.6	0.486204	0.548185	0.600672	0.243015	0.476878	0	0	0	0	1	Oo
13417	6.98806	7.7067	7.64066	7.34859	7.30313	1.6725	-1.047	-1.2245	-0.034	-1.2655	0.010847	0.710897	0.166122	0.681918	0.058401	1	1	1	1	1	Oo
13418	6.54029	6.55898	6.71306	7.16155	6.83469	0.0135	1.113	1.3725	-1.256	0.099	0.688068	0.544007	0.100083	0.257703	0.373414	0.5	1	1	1	1	OoCc
13423	8.84489	8.07411	8.10502	8.1792	8.11631	-1.706	1.022	1.053	-1.045	1.008	0.000903347	0.92486	0.816769	0.858953	0.966855	1	1	1	1	1	Oo
13424	9.37973	8.30609	7.46244	7.38822	7.41101	-2.105	-1.795	-1.053	1.016	-1.036	2.33598e-06	0.00034463	0.769536	0.935951	0.806784	1	1	1	0	1	Oo
13426	5.0859	4.69411	5.22321	5.83947	5.9639	-1.312	1.443	1.533	1.09	1.671	0.144112	0.105132	0.0696843	0.770824	0.0164907	0	0	0	0	1	OoMur
13427	9.22422	9.6156	9.22624	9.50918	9.43353	1.312	-1.31	1.217	-1.054	1.155	0.00436232	0.0154198	0.0816743	0.703506	0.150723	1	1	1	1	1	Oo
13433	11.9149	13.1049	12.661	12.3349	12.4078	2.484	-1.36933	-1.25833	0.387333	-1.192	0.000219224	0.122157	0.231052	0.673269	0.226437	1	1	1	1	1	Oo
13434	6.50229	6.71386	6.78327	7.29322	7.39756	1.158	1.049	1.424	1.075	1.531	0.115276	0.711004	0.00392314	0.60544	0.000381977	0	1	0	1	1	OoCc
13435	7.02301	7.30984	7.3112	7.24617	7.3139	0.5168	-0.1986	0.1486	0.2376	0.1856	0.197168	0.579467	0.683461	0.269478	0.448958	1	0.6	1	1	1	Oo
13436	7.35975	6.92428	7.03789	7.55728	7.15379	-0.4275	0.086	1.4335	-1.336	0.0935	0.400282	0.614302	0.0138041	0.172191	0.339739	0	1	0	1	0	OoMur
13437	9.92633	7.20442	7.45476	8.20623	8.13804	-6.69567	1.196	1.68467	-0.383667	1.60833	2.08924e-11	0.364577	0.00262249	0.607382	0.00153581	1	1	1	1	1	Oo
13445	8.61035	8.66098	8.49313	7.80606	7.32592	-0.294	-1.126	-1.63667	-1.40233	-2.30967	0.576631	0.502687	0.0117364	0.114064	9.38013e-05	1	1	1	1	1	Oo
13476	8.65586	8.55655	8.40561	8.34582	8.14426	-0.437667	-1.11333	-0.379	-1.15367	-1.20867	0.311486	0.513406	0.575375	0.429538	0.370745	1	1	1	1	1	OoCc
13483	5.6015	6.92749	7.02631	6.96998	7.75029	2.507	1.071	-1.04	1.717	1.652	0.000183945	0.837634	0.911021	0.0693839	0.036545	0	0	0	0	1	Oo
13486	7.79798	6.50994	6.16305	5.44328	4.8266	-2.485	-1.292	-1.1805	-1.631	-3.4485	0.000113259	0.446886	0.058569	0.39449	0.0847172	1	1	0.5	0.5	0.5	Oo
13490	4.96595	5.42043	5.25101	5.06467	5.12542	1.37	-1.125	-1.138	1.043	-1.091	0.0605284	0.598537	0.587289	0.879948	0.665456	1	0	1	0	1	Oo
13494	9.22788	8.18119	8.1227	8.04892	8.12176	-2.09	-0.380333	-0.387333	-0.255333	-0.327333	0.000168378	0.489333	0.771063	0.275099	0.24673	1	0.666667	1	1	1	Oo
13497	8.36895	8.13449	7.98058	7.7298	8.06132	-1.176	-1.113	-1.19	1.258	1.058	0.412118	0.72182	0.539254	0.463483	0.841202	1	1	0	0	0	Oo
13506	1.57075	2.80366	5.28532	5.32181	6.08906	2.35	5.585	1.026	1.702	1.746	0.00572011	7.55614e-05	0.959687	0.174125	0.0882629	0	0	0	0	1	OoCc
13507	4.89975	5.01792	4.91135	4.94515	5.85106	1.085	-1.077	1.024	1.874	1.918	0.709265	0.812874	0.949617	0.0335921	0.0092797	0	0	0	1	1	Oo
13518	5.67192	7.497	7.05217	6.59163	6.63806	5.072	-0.5645	-1.3925	0.038	-1.3325	0.0146979	0.174055	0.292087	0.574189	0.205533	1	0.5	1	1	1	OoMur
13521	7.20164	8.49004	8.31134	6.38217	4.65278	2.449	-0.1465	-3.998	-4.0435	-18.981	3.14683e-06	0.454982	4.24123e-07	0.00141376	5.77498e-10	1	0.5	1	0	0	Oo
13528	7.64264	7.0536	6.95585	6.63721	6.98204	-1.504	-1.07	-1.247	1.27	1.018	0.0334292	0.823104	0.390034	0.420941	0.945775	0	1	0	0	0	OoCcMur
13529	4.10085	5.3658	5.84005	6.70861	6.80831	2.403	1.389	1.826	1.072	1.956	8.80879e-05	0.145921	0.0114667	0.821815	0.00277235	0	0	0	0	1	Oo
13537	6.46378	7.40802	7.54821	6.79603	6.43214	1.924	1.102	-1.684	-1.287	-2.168	1.17516e-06	0.431421	0.000177075	0.0538954	7.33576e-07	1	0	1	0	0	Oo
13542	7.82301	7.35381	7.50052	6.80513	6.64602	-1.3905	1.1085	-1.6225	-0.155	-1.957	0.0808481	0.536174	0.0219724	0.158661	0.154949	1	0.5	1	0.5	0.5	Oo
13548	5.08054	6.21946	6.35306	6.41584	6.99524	2.25433	0.435667	0.381667	1.49733	1.56267	0.000219766	0.458895	0.6331	0.0442648	0.0112851	0.666667	0	0.666667	1	1	Oo
13555	6.9962	8.05095	7.34724	7.48501	7.9643	1.737	-1.7475	0.121	1.408	1.643	0.283823	0.140998	0.191233	0.0779566	0.292693	1	0.5	1	1	1	Oo
13559	10.4803	10.0273	10.1766	10.322	10.4618	-0.832	0.448333	1.10633	0.441667	1.226	0.108696	0.482814	0.470565	0.474659	0.237778	1	0.666667	0.666667	1	1	Oo
13560	6.12814	6.82865	7.10665	7.37811	7.1342	1.625	1.213	1.207	-1.184	1.019	7.61478e-05	0.118009	0.148098	0.21822	0.884395	1	0	1	1	1	Oo
13589	7.88274	7.76583	7.74514	7.82246	7.87958	-0.194	-0.01675	0.05975	0.541	0.6035	0.11512	0.547177	0.50576	0.543433	0.510937	0.75	0.75	0.5	0.5	0.75	Oo
13592	4.61194	5.13933	5.77209	5.29388	4.84992	1.441	1.551	-1.393	-1.36	-1.895	0.00724917	0.00777901	0.0417024	0.0772246	0.00017532	1	0	0	0	0	Oo
13593	5.24759	4.78136	5.30432	5.1298	5.45369	-1.381	1.437	-1.129	1.252	1.109	0.0647725	0.085734	0.631983	0.350247	0.619991	0	0	1	0	1	Oo
13595	5.7163	5.94256	5.92958	6.16762	6.27868	1.17	-1.009	1.179	1.08	1.274	0.0937344	0.951934	0.169837	0.579938	0.0232396	0	0	0	0	1	OoMur
13603	7.81554	7.91997	8.20799	8.33905	8.32743	1.075	1.221	1.095	-1.008	1.086	0.466939	0.0972761	0.512487	0.962672	0.472816	0	0	1	1	1	Oo
13605	10.6685	9.8765	9.50889	9.58418	9.63872	-1.731	-1.29	1.054	1.039	1.094	0.00013565	0.0840167	0.777564	0.855003	0.527198	1	1	1	1	1	Oo
13610	5.45104	8.0982	8.99602	8.88252	9.11935	6.6225	1.9425	-0.087	1.1855	1.089	2.84065e-06	0.155703	0.763326	0.654487	0.694621	0.5	0	0.5	0.5	1	Oo
13614	2.63024	5.08783	5.51124	6.50187	6.26995	5.493	1.341	1.987	-1.174	1.692	6.69211e-07	0.330189	0.0232873	0.658575	0.0512218	0	0	0	1	1	OoCc
13618	6.38875	6.45921	6.74633	6.74004	6.56847	0.0725	1.233	-0.0045	-0.141	-0.145	0.022651	0.449487	0.978337	0.504673	0.47299	0.5	0.5	0.5	0.5	1	OoCcMur
13619	9.00009	7.87554	7.68905	7.7969	8.11844	-2.18	-1.138	1.078	1.25	1.347	6.20799e-05	0.541064	0.759114	0.31225	0.0972831	1	1	1	1	1	Oo
13626	9.81021	10.0324	10.3365	10.5322	10.7626	1.167	1.235	1.145	1.173	1.344	0.0393747	0.0207924	0.149812	0.105095	0.00117686	1	1	1	1	1	Oo
13627	12.7516	12.9786	12.6441	12.5701	12.3738	1.17	-1.261	-1.053	-1.146	-1.206	0.0290823	0.00942237	0.613852	0.148054	0.0200969	1	1	1	1	1	Oo
13629	10.7353	9.73539	8.94912	8.7596	9.02711	-2	-1.725	-1.14	1.204	1.056	0.000220396	0.00787307	0.565281	0.413405	0.788187	1	1	1	1	1	Oo
13631	9.1587	10.4756	10.6581	10.9474	11.278	2.733	1.137	1.222	1.2575	1.5375	2.64748e-05	0.405916	0.127381	0.111417	0.00087212	1	1	1	1	1	OoCc
13638	5.63437	5.59229	5.36342	5.4218	4.97506	-1.03	-1.172	1.041	-1.363	-1.309	0.896298	0.569125	0.904856	0.278225	0.254461	1	0	0	0	0	Oo
13640	8.3611	9.77237	9.89036	9.85751	9.7987	2.66	1.085	-1.023	-1.042	-1.066	4.83485e-09	0.543127	0.887563	0.827813	0.600325	1	0	1	1	1	OoCc
13641	5.6655	5.41158	5.59102	5.65558	6.01361	-1.1955	0.1605	0.0495	1.2835	1.3565	0.311671	0.314142	0.687645	0.241031	0.182377	0.5	1	0	0.5	0.5	OoCc
13642	6.59007	7.5395	7.41742	6.80788	7.38996	2.1485	-0.093	-1.5285	1.497	-0.02	0.1444	0.814921	0.167361	0.214249	0.889408	0.5	0.5	0.5	0.5	1	Oo
13645	6.06017	6.99221	7.77282	7.97777	8.36983	1.908	1.718	1.153	1.312	1.513	9.12265e-06	0.000544664	0.341111	0.0726601	0.00232469	1	1	1	1	1	Oo
13649	5.95834	5.42207	6.22547	7.20233	7.3933	-1.52467	2.157	2.31267	0.501	3.028	0.21643	0.412096	0.252631	0.534589	0.129543	0.666667	0.666667	0.666667	1	1	OoCc
13650	8.45161	9.95967	10.7002	10.3946	10.0352	2.844	1.671	-1.236	-1.283	-1.586	1.36077e-10	2.63813e-05	0.0317828	0.0222344	2.839e-05	1	1	1	1	1	Oo
13653	9.03716	9.57097	9.14542	9.13027	9.09873	1.448	-1.343	-1.011	-1.022	-1.033	0.0197685	0.114536	0.967091	0.933383	0.869289	1	1	1	1	1	OoMur
13654	7.43332	5.68733	4.85544	4.99161	4.7667	-3.354	-1.78	1.099	-1.169	-1.063	8.82717e-08	0.00269235	0.659951	0.451726	0.73088	1	1	0	0	0	Oo
13660	7.92576	6.9152	6.51007	6.61567	6.72529	-2.015	-1.324	1.076	1.079	1.161	7.52083e-05	0.114057	0.741369	0.74121	0.37472	1	1	1	1	1	OoCcMur
13661	2.54571	5.98415	7.54441	8.10473	8.23024	11.572	3.1315	1.534	1.0915	1.6935	1.48787e-06	0.0837112	0.439652	0.62653	0.389392	0.5	0	1	1	1	Oo
13663	8.418	8.50183	8.30272	8.28739	8.41286	1.06	-1.148	-1.011	1.091	1.079	0.547938	0.243594	0.948926	0.537312	0.495143	1	1	1	1	1	Oo
13664	6.8021	6.33569	6.22052	4.74952	3.90662	-1.3995	-0.0935	-3.1365	-1.839	-6.368	0.130412	0.55594	0.00143584	0.0602189	1.0456e-05	1	1	1	0.5	0	Oo
13665	9.22039	8.58621	9.15212	9.12301	9.08307	-1.552	1.48	-1.02	-1.028	-1.049	0.000103815	0.00190619	0.894877	0.863987	0.676677	1	1	1	1	1	OoMur
13666	7.07259	7.8754	7.6865	6.97954	6.62559	1.745	-1.14	-1.632	-1.278	-2.086	3.37869e-05	0.336235	0.000923888	0.0911451	5.4565e-06	1	1	1	1	1	Oo
13667	8.52515	10.0069	10.0848	10.4445	10.6531	2.793	1.055	1.283	1.156	1.483	4.47691e-08	0.742676	0.0930437	0.377384	0.00467512	1	1	1	1	1	Oo
13669	9.40999	8.38449	8.12172	8.20451	8.18062	-2.053	-1.2005	0.062	-0.017	0.0435	1.46214e-05	0.158444	0.589346	0.916424	0.611751	1	1	1	1	1	Oo
13680	8.72651	10.2222	10.1548	9.92691	10.2073	2.82	-1.048	-1.171	1.215	1.037	4.26072e-08	0.780317	0.309713	0.222324	0.806794	1	1	1	1	1	OoMur
13681	8.61388	9.23177	8.42064	8.07019	8.19488	1.54867	-1.76967	-1.28033	0.426667	-1.17067	0.0658321	0.00460913	0.235128	0.757201	0.380068	1	0.666667	0.666667	0.333333	0.666667	Oo
13682	9.87098	8.70447	8.75291	9.27455	9.17984	-2.245	1.034	1.436	-1.068	1.344	9.0503e-06	0.872609	0.0406734	0.768217	0.0598724	1	1	1	1	1	Oo
13684	8.44092	8.5035	8.56057	8.59161	8.58122	0.0545	0.0445	0.02375	-0.00725	0.016	0.216093	0.668125	0.591329	0.688204	0.7565	0.75	1	0.75	0.75	0.75	Oo
13685	10.0512	7.2666	6.3045	4.78896	4.61874	-6.891	-1.9575	-3.187	-1.1255	-3.537	9.02132e-10	0.00198259	0.0013082	0.611234	7.27803e-05	0.5	1	0.5	0.5	0.5	Oo
13688	6.67338	7.30172	7.14957	6.20438	6.01624	1.548	-0.118	-2.3155	-1.14	-2.588	0.0328897	0.565752	0.442078	0.578527	0.0807063	1	0.5	1	0.5	0.5	Oo
13690	9.56896	9.1744	9.02831	8.99846	8.97331	-1.32625	-0.14175	-0.0235	-0.02275	-0.0435	0.0831331	0.392996	0.647238	0.432502	0.698425	0.75	1	0.75	1	0.75	Oo
13709	5.05423	6.25153	5.9262	4.7429	4.27385	2.293	-1.253	-2.271	-1.384	-3.143	0.000100316	0.312278	0.000813937	0.174218	1.07874e-05	1	0	0	0	0	Oo
13710	7.17142	6.86826	6.99975	7.22553	7.38349	-1.234	1.095	1.169	1.116	1.305	0.0590248	0.530503	0.279331	0.490631	0.0334345	1	1	1	1	1	Oo
13713	5.15158	5.78742	6.58397	6.84226	6.51076	1.554	1.737	1.196	-1.258	-1.052	0.00853916	0.00696888	0.408427	0.293535	0.800666	1	1	1	1	1	OoCcMur
13714	7.26092	7.82103	7.73387	7.74767	7.6008	1.03467	-1.063	0.336667	0.184667	0.126667	0.0249322	0.638152	0.226643	0.415356	0.048101	0.333333	0.333333	0.333333	0.333333	1	Oo
13716	7.6337	7.50889	7.1812	7.7471	8.00974	-0.172	-0.2905	1.4835	1.21	1.809	0.0793646	0.517972	0.375882	0.596712	0.290446	0.5	0.5	0.5	0.5	0.5	Oo
13722	8.53375	7.35119	7.33933	7.41718	7.46109	-2.27	-1.008	1.055	1.031	1.088	5.78053e-07	0.965094	0.755569	0.87319	0.527389	1	1	1	1	1	Oo
13723	5.96997	6.85697	6.43018	7.01752	7.12311	1.849	-1.344	1.502	1.076	1.617	0.000217885	0.0869761	0.0237804	0.74367	0.00454011	1	0	1	1	1	OoCc
13726	7.14867	7.1333	6.47835	6.54534	6.67972	-1.011	-1.575	1.048	1.098	1.15	0.951777	0.0265939	0.856871	0.717918	0.469289	1	0	0	0	1	Oo
13728	5.95584	6.85394	6.93715	7.19692	7.6215	1.57	0.397667	1.20333	0.714333	1.63633	0.00247081	0.431953	0.499859	0.368341	0.0672955	0.333333	0.333333	0.333333	0.333333	1	OoMur
13731	6.20253	6.93452	7.29996	7.41946	7.60423	1.661	1.288	1.086	1.137	1.235	4.24322e-05	0.0400516	0.56222	0.358706	0.061712	1	1	1	1	1	Oo
13733	5.70838	5.70613	5.97353	6.08019	5.64887	-1.002	1.204	1.077	-1.348	-1.252	0.991582	0.31135	0.738092	0.12548	0.170909	1	0	1	1	0	Oo
13797	3.52938	6.66307	7.8782	7.5176	8.08289	8.777	2.322	-1.284	1.48	1.152	3.83907e-10	0.000558639	0.283551	0.124115	0.514907	0	0	1	1	1	Oo
13800	8.42901	7.80098	7.66296	7.55669	7.7611	-1.678	-0.439333	0.247	1.155	0.410667	0.287569	0.372516	0.70124	0.476258	0.472156	1	1	0.666667	1	1	OoCc
13804	5.9603	7.39192	7.41904	6.60559	6.37268	2.959	1.0195	-1.758	-1.179	-2.0695	0.000495749	0.933579	0.00207828	0.425871	0.000282906	1	0	1	1	1	OoCc
13819	9.16158	8.30159	6.08823	3.78263	5.25822	-1.815	-4.638	-4.944	2.781	-1.778	0.262274	0.0209163	0.0169152	0.187752	0.361847	1	1	0	0	0	Oo
13822	9.04838	9.07321	8.75139	9.03765	9.26131	1.017	-1.25	1.219	1.168	1.424	0.878767	0.0840065	0.14439	0.286124	0.00499583	1	1	1	1	1	Oo
13823	7.35901	6.549	7.29016	7.30482	7.42942	-1.753	1.672	1.01	1.09	1.101	0.00287953	0.0180145	0.971924	0.754462	0.645248	0	1	1	1	1	Oo
13824	7.29328	8.34043	8.08856	8.56947	8.30153	2.066	-1.191	1.396	-1.204	1.159	1.43051e-06	0.186722	0.0156152	0.203023	0.225857	1	1	1	1	1	Oo
13829	7.31781	7.05148	7.12161	7.19613	7.12251	-0.2305	0.0525	0.057	-1.0535	0.001	0.438435	0.686341	0.679566	0.865774	0.767305	0.5	1	1	0.5	0.5	Oo
13830	6.33242	8.33933	8.29853	8.54717	8.96974	4.0215	-0.031	1.188	1.3405	1.593	7.45479e-09	0.540663	0.31109	0.102262	0.0046483	1	0.5	1	1	1	OoCc
13831	8.80952	9.33744	9.27391	9.23085	9.23446	0.692	-1.0455	-0.033	0.003	-0.0285	0.0152871	0.792494	0.521471	0.40105	0.810752	1	0.5	1	1	1	Oo
13837	3.93043	5.54258	6.24234	7.75426	7.80697	3.0805	1.6495	2.88	0.0425	3.0885	0.019411	0.146291	0.0233892	0.668625	0.00593252	0.5	0	0.5	1	1	Oo
13838	5.9969	6.3273	7.2048	7.78472	7.69203	0.79	1.8415	1.095	-0.08575	1.07225	0.134615	0.0405686	0.305469	0.497372	0.189367	0.5	0	0.75	1	1	OoCcMur
13850	6.00918	5.4228	5.75008	5.82619	6.25525	-1.501	1.255	1.054	1.346	1.419	0.00150361	0.108336	0.766428	0.0594824	0.00980622	1	1	0	1	1	Oo
13852	8.21566	8.5263	8.27051	8.3273	7.9748	1.24	-1.194	1.04	-1.277	-1.227	0.0317309	0.137602	0.792895	0.0662317	0.0627939	1	1	1	1	1	Oo
13854	7.06828	7.17882	7.00531	6.85529	6.94853	1.08	-1.128	-1.11	1.067	-1.04	0.513069	0.419143	0.523477	0.721056	0.786269	0	1	0	0	0	Oo
13855	7.55749	9.17313	9.11624	9.39289	9.54687	4.129	0.1536	1.2148	0.7224	1.364	0.130685	0.513552	0.282558	0.388848	0.23051	0.6	0.2	0.8	0.8	1	Oo
13857	6.25684	6.74019	6.67924	6.53805	6.59292	1.398	-1.043	-1.103	1.039	-1.062	0.0105493	0.816926	0.58484	0.858691	0.694093	1	0	0	0	1	Oo
13858	7.92939	8.27099	8.19594	8.21345	8.13493	0.3545	-0.0575	0.0135	-1.0565	-0.0465	0.150118	0.55517	0.54727	0.826858	0.551267	0.5	0.5	0.5	0.5	1	OoCc
13859	6.87254	7.86817	7.84878	8.16964	8.27203	2.238	-0.0145	1.2585	1.075	1.344	0.0286954	0.654958	0.369417	0.794198	0.152936	1	0.5	1	1	1	Oo
13860	5.19119	6.99313	7.86834	8.45293	8.56694	3.79267	1.85133	1.50567	0.419333	1.632	0.000147641	0.0120299	0.0859824	0.64753	0.0325323	0.666667	0	0.666667	1	1	OoCc
13867	5.64231	5.6455	5.70172	5.8186	6.05982	1.002	1.04	1.084	1.182	1.282	0.990014	0.876733	0.750593	0.488462	0.188103	1	0	0	0	1	Oo
13870	5.96192	6.16916	6.2747	6.05459	5.92485	1.154	1.076	-1.165	-1.094	-1.274	0.290329	0.699254	0.411397	0.666888	0.113226	1	0	1	1	1	Oo
13872	7.8678	7.15664	7.42309	7.47977	7.22001	-1.637	1.203	1.04	-1.197	-1.151	0.000224033	0.186739	0.823921	0.245235	0.278276	1	1	1	1	1	Oo
13875	5.7259	5.56167	5.78196	5.62707	5.27461	-1.121	1.165	-1.113	-1.277	-1.421	0.577242	0.571186	0.7235	0.388364	0.120834	0	1	0	0	0	Oo
13877	7.79764	8.57661	8.9527	9.27959	8.68396	1.716	1.298	1.254	-1.511	-1.205	0.00338576	0.21532	0.316621	0.0744193	0.342118	1	0	1	1	1	Oo
13885	9.88424	8.76799	8.46273	8.35143	8.30225	-2.168	-1.236	-1.08	-1.035	-1.118	6.04069e-08	0.0550508	0.547465	0.818637	0.278075	1	1	1	1	1	Oo
13924	5.50042	5.3607	5.86706	6.76572	7.05442	-1.102	1.42	1.864	1.222	2.277	0.42864	0.0204327	0.00031223	0.224341	6.02188e-06	0	1	0	1	1	Oo
13929	7.39255	7.04954	7.16649	7.03086	6.92344	-1.2695	0.0995	-1.0985	-0.0825	-1.1925	0.0929037	0.268456	0.59078	0.554435	0.433752	0.5	1	0.5	0.5	0.5	Oo
13972	6.60276	6.19236	6.86448	7.59113	7.34169	-1.329	1.593	1.655	-1.189	1.392	0.0412806	0.00781271	0.00495365	0.364063	0.0334901	1	1	1	1	1	Oo
13982	10.8132	10.1906	9.63426	8.82477	8.45061	-1.5945	-1.4725	-1.7605	-1.2965	-2.283	0.0531166	0.124017	0.00927483	0.264608	0.000411892	1	1	1	1	1	Oo
13990	7.26199	7.51032	7.44925	7.44578	7.36366	0.259	-0.0445	-0.0025	-0.0615	-1.0615	0.0372453	0.682671	0.741904	0.705013	0.657801	1	1	1	1	1	Oo
13996	6.91609	6.54684	6.35262	6.34506	6.48806	-1.292	-1.144	-1.005	1.104	1.098	0.166093	0.61997	0.986607	0.772798	0.699511	0	0	0	1	1	Oo
13998	5.64616	8.78137	9.17572	9.55681	9.80748	24.8145	0.4735	1.3025	0.238	1.6205	2.10338e-06	0.148419	0.161934	0.13221	0.0591357	1	0.5	1	1	1	OoMur
14004	12.3082	11.8021	11.7319	11.8666	11.7731	-1.42	-1.05	1.098	-1.067	1.029	0.000312456	0.67244	0.416224	0.60771	0.786318	1	1	1	1	1	Oo
14007	8.99672	8.52122	8.10906	8.79288	8.74455	-1.40667	-1.33833	1.61733	-0.373	1.59433	0.101443	0.125333	0.00672898	0.481043	0.0223165	1	1	1	1	1	OoCc
14009	5.64412	4.31643	5.56112	7.34196	7.26441	-2.872	2.3725	3.6445	-0.0605	3.342	0.000213711	2.34638e-06	2.99608e-07	0.472386	3.40801e-08	0	0.5	0.5	1	1	OoMur
14017	4.70573	4.27736	3.90683	4.72737	4.7257	-1.346	-1.293	1.766	-1.001	1.764	0.117143	0.275488	0.0182896	0.996606	0.0101723	0	1	0	0	0	Oo
14020	9.82207	10.1205	10.0601	10.1406	10.0351	0.258	-0.045	1.058	-1.076	-0.018	0.476384	0.552892	0.665341	0.589314	0.789933	1	1	1	1	1	Oo
14026	7.59739	7.38231	7.00937	7.17664	7.55175	-0.529333	-0.652333	0.461	1.32067	1.506	0.256629	0.39463	0.57832	0.395012	0.231765	1	1	0.666667	0.333333	0.666667	OoCc
14028	4.608	7.71782	7.87167	7.64691	7.33654	8.633	1.113	-1.169	-1.24	-1.449	9.20579e-08	0.771315	0.685237	0.578383	0.205074	0	0	1	0	0	Oo
14030	8.94423	9.6682	9.51009	8.96647	8.65437	1.652	-1.116	-1.458	-1.242	-1.81	0.000167732	0.452942	0.00969345	0.15254	9.91964e-05	1	1	1	1	1	Oo
14042	7.7285	8.27039	8.24529	8.20265	8.31727	1.456	-1.018	-1.03	1.083	1.051	0.00265501	0.923702	0.871719	0.650965	0.725029	1	1	1	1	1	Oo
14043	6.62164	7.29104	7.04237	7.12439	7.64831	1.59	-1.188	1.059	1.438	1.522	0.00362836	0.360537	0.803427	0.070656	0.0143309	1	0	1	0	1	OoMur
14048	7.30366	8.45054	7.97239	8.11728	7.59692	2.214	-1.393	1.106	-1.434	-1.297	0.000110268	0.125311	0.706584	0.148189	0.188811	1	0	1	1	1	Oo
14050	8.2691	8.23312	8.1144	8.42962	8.54058	-0.0355	-0.0945	1.2505	0.091	1.391	0.0446121	0.547582	0.322933	0.514275	0.423056	0.5	0.5	0.5	0.5	1	Oo
14051	3.2314	4.86911	5.35356	6.48327	6.58432	3.112	1.399	2.188	1.073	2.347	0.00658215	0.548482	0.115999	0.942239	0.0586914	0	0	0	0	1	OoCcMur
14055	7.28609	6.72639	6.91027	6.92956	7.00325	-1.5325	1.1365	0.015	1.0525	0.0695	0.183592	0.440188	0.607638	0.806167	0.609916	1	1	1	1	1	OoMur
14056	9.03217	10.8502	10.7772	11.304	11.5726	3.526	-1.052	1.441	1.205	1.736	2.11818e-08	0.795823	0.033422	0.321564	0.00109523	1	1	1	1	1	Oo
14061	5.91487	6.6986	7.28391	7.57136	7.58291	1.722	1.5	1.22	1.008	1.23	0.000194002	0.00992956	0.216326	0.970947	0.13754	1	0	1	1	1	Oo
14062	6.46803	5.61072	5.81238	5.51629	5.37089	-1.812	1.15	-1.228	-1.106	-1.358	0.000629441	0.483894	0.312022	0.669108	0.076411	0	0	1	0	0	Oo
14064	6.34045	5.8997	6.13394	6.15917	6.08669	-1.357	1.176	1.018	-1.052	-1.033	0.0819238	0.47415	0.953334	0.866414	0.88484	1	1	1	1	1	Oo
14073	5.78444	6.20568	6.42212	6.47927	6.18263	1.339	1.162	1.04	-1.228	-1.181	0.00841489	0.24904	0.807107	0.144499	0.160957	1	1	1	1	1	Oo
14081	8.14256	7.91453	7.90031	7.64245	7.66898	-1.1785	-1.0095	-1.1965	1.0185	-1.1755	0.303672	0.947165	0.139814	0.901423	0.157015	1	1	1	1	1	OoMur
14082	7.62938	8.2748	7.95041	7.97677	7.79165	1.564	-1.252	1.018	-1.137	-1.116	0.00210564	0.167274	0.934927	0.507024	0.479334	1	1	1	1	1	OoCc
14083	7.99784	7.86677	7.98914	8.0961	8.30125	-1.095	1.089	1.077	1.153	1.242	0.525247	0.660062	0.728328	0.48548	0.174644	1	0	1	1	1	Oo
14084	9.68877	9.04603	8.52518	8.9814	9.04337	-1.561	-1.435	1.372	1.044	1.432	0.00510852	0.0484987	0.0944148	0.866226	0.0339512	1	1	1	1	1	Oo
14086	6.02321	3.677	4.03112	4.17147	6.24475	-5.085	1.278	1.102	4.208	4.638	0.000360975	0.648599	0.877001	0.011146	0.0016279	0	0	0	0	1	OoCcMur
14087	7.50418	7.50924	7.41905	7.46568	7.32999	1.004	-1.065	1.033	-1.099	-1.064	0.977816	0.70381	0.861222	0.5943	0.666289	1	1	1	1	1	OoCc
14088	7.6973	7.18283	7.52353	7.85799	7.77431	-1.468	1.273	1.267	-1.0615	1.2045	0.0671761	0.236627	0.128765	0.650995	0.447533	0	0.5	0.5	0.5	0.5	OoCcMur
14104	6.22897	8.16128	8.24352	7.91655	7.7795	3.817	1.059	-1.254	-1.1	-1.379	1.66969e-08	0.776961	0.218748	0.660661	0.0449173	1	0	1	1	1	OoCcMur
14105	7.09706	6.58053	6.26161	6.6807	6.62133	-1.55425	-1.25	0.8685	-0.0625	0.813	0.317723	0.250575	0.237427	0.400572	0.314562	0.75	1	0.5	0.75	0.75	Oo
14107	11.4861	12.5889	12.1836	12.0367	12.2674	2.148	-1.324	-1.107	1.173	1.06	1.07292e-06	0.0422669	0.525285	0.353809	0.691227	1	1	1	1	1	Oo
14109	10.3912	9.33124	9.15524	9.4149	9.55983	-2.085	-1.13	1.197	1.106	1.324	5.29943e-05	0.533437	0.365568	0.656537	0.0924993	1	1	1	1	1	Oo
14113	9.36509	8.2668	7.48277	7.08519	7.12363	-2.1455	-1.742	-1.3245	1.027	-1.2915	3.40051e-05	0.013462	0.200309	0.912064	0.223163	1	0	1	0.5	1	Oo
14114	8.10441	7.96062	8.16096	8.10062	8.0682	-1.105	1.149	-1.043	-1.023	-1.066	0.632679	0.64214	0.902054	0.965026	0.819392	1	1	0	0	1	Oo
14118	4.74687	5.53786	5.24956	5.52857	5.24759	1.73	-1.221	1.213	-1.215	-1.001	0.00285892	0.35382	0.400959	0.417482	0.995234	0	0	0	0	1	OoCcMur
14121	7.90157	8.53473	9.18104	9.41651	9.58653	1.551	1.565	1.177	1.125	1.325	1.58457e-05	0.000127605	0.106135	0.279741	0.00329669	1	1	1	1	1	OoMur
14123	6.41311	7.03145	6.81822	6.07887	6.67506	1.535	-1.159	-1.669	1.512	-1.104	0.0029818	0.386215	0.00362306	0.0259741	0.526961	1	0	1	0	1	Oo
14137	9.82887	10.4988	10.585	10.951	10.8522	1.5935	0.064	1.289	-1.071	1.2045	0.000191605	0.609322	0.0566265	0.652041	0.123892	1	1	1	1	1	OoCcMur
14148	9.15976	9.17817	9.75433	9.39396	9.4987	1.013	1.491	-1.284	1.075	-1.194	0.918165	0.00671562	0.0855106	0.679849	0.169559	1	1	1	1	1	OoCc
14151	7.14889	6.30839	6.1476	5.70441	5.8327	-1.87233	-1.12167	-0.754333	-0.190333	-0.695667	0.0864914	0.660752	0.271435	0.340775	0.339782	1	1	0.666667	0.333333	0.666667	Oo
14155	7.96796	7.54839	8.27535	8.46747	8.72842	-1.3375	1.6555	0.157	1.217	0.4475	0.0101127	0.000854599	0.43905	0.505694	0.407315	1	1	1	1	1	Oo
14156	8.10213	8.29683	8.70574	8.55065	8.44173	1.1545	1.3305	-1.1165	-0.0885	-0.232	0.525696	0.12404	0.581512	0.442988	0.400889	1	1	1	1	1	Oo
14158	6.48146	7.96555	8.71046	9.19706	8.7118	2.797	1.676	1.401	-1.4	1.001	5.89432e-08	0.00143904	0.026127	0.0406236	0.995246	1	0	1	1	1	Oo
14160	5.76945	6.94467	7.05694	6.97736	7.0247	2.258	1.081	-1.057	1.033	-1.023	0.000438839	0.809785	0.872871	0.947876	0.938828	0	1	0	0	1	Oo
14163	5.22627	6.62553	7.01535	6.8451	7.01242	2.638	1.31	-1.125	1.123	-1.002	1.30628e-06	0.121184	0.563084	0.587989	0.991988	1	0	1	1	1	Oo
14164	5.37815	5.73573	6.40142	6.33138	6.25838	1.281	1.586	-1.05	-1.052	-1.104	0.054981	0.0052227	0.804484	0.807976	0.507069	1	0	1	1	1	Oo
14168	5.48034	2.21363	2.95491	2.26598	2.84941	-9.625	1.672	-1.612	1.498	-1.076	3.19594e-07	0.160441	0.220819	0.329557	0.849421	0	1	0	0	0	Oo
14178	5.68242	5.11235	5.45552	6.00287	5.67449	-1.485	1.269	1.461	-1.256	1.164	0.0377345	0.308906	0.109648	0.383893	0.486322	0	0	1	1	1	OoCcMur
14179	-0.0662442	8.064	8.55661	8.20047	7.62994	280.186	1.407	-1.28	-1.485	-1.901	5.54668e-15	0.169347	0.365199	0.146264	0.00715125	1	0	1	1	1	Oo
14180	6.45586	6.93426	7.51091	7.33036	7.19034	1.393	1.494	-0.147	-1.1045	-0.281	0.0059431	0.0109766	0.453484	0.602248	0.491873	1	0.5	1	1	1	Oo
14183	6.12945	6.07965	6.41786	7.01424	6.93675	-0.0455	1.2975	1.512	-0.059	1.4375	0.0401883	0.493916	0.0111188	0.62955	0.024185	0.5	0	0.5	1	1	Oo
14186	6.14144	6.2049	6.43698	6.46262	6.38091	1.045	1.175	1.018	-1.058	-1.04	0.809428	0.480973	0.952715	0.850653	0.862535	0	0	0	0	1	OoCcMur
14187	6.49199	7.27153	7.76913	8.45459	7.94282	1.717	1.412	1.608	-1.426	1.128	4.78951e-05	0.0115417	0.00123492	0.0193507	0.330729	1	0	1	1	1	OoCcMur
14191	7.90577	7.5001	7.69047	8.28245	8.31169	-1.325	1.141	1.507	1.02	1.538	0.0386129	0.473074	0.0150541	0.951828	0.00648371	1	1	1	1	1	Oo
14194	10.6585	9.92239	9.86514	9.77688	10.062	-1.666	-1.04	-1.063	1.218	1.146	7.57519e-06	0.744881	0.628496	0.0911512	0.16295	1	1	1	1	1	Oo
14198	6.93988	7.36046	7.1664	7.37465	7.50017	1.338	-1.144	1.155	1.091	1.26	0.00763765	0.298589	0.288368	0.572549	0.0480315	0	0	0	0	1	Oo
14199	7.79773	5.91088	5.4711	5.3431	5.13539	-3.698	-1.356	-1.093	-1.155	-1.262	6.49542e-09	0.053484	0.638365	0.431804	0.108501	1	1	0	0	0	Oo
14208	8.35304	8.2264	7.96602	7.98452	7.7513	-1.092	-1.198	1.013	-1.175	-1.16	0.361904	0.123201	0.937064	0.21482	0.169726	1	1	1	1	1	Oo
14211	9.23113	8.5959	7.93278	7.39045	6.78841	-1.21467	-1.58833	-1.50233	-1.526	-2.236	0.0371202	0.032912	0.239806	0.0659872	0.000523951	1	1	1	0.666667	0.333333	Oo
14218	10.2111	10.7495	10.625	10.5482	10.7212	1.452	-1.09	-1.055	1.127	1.069	0.000446842	0.506329	0.712176	0.413841	0.57067	1	0	1	1	1	Oo
14225	8.55965	8.4035	8.32992	8.17987	8.10156	-0.3334	-0.6558	-0.716	-0.655	-0.7814	0.0842605	0.556991	0.470282	0.417691	0.352919	1	0.6	0.6	0.6	1	Oo
14227	8.8877	8.89914	8.4172	8.39945	8.07165	1.008	-1.397	-1.012	-1.255	-1.271	0.955826	0.0436801	0.957359	0.213139	0.113857	1	1	1	1	1	Oo
14228	6.90475	6.20766	6.10975	4.23887	4.68934	-1.621	-1.07	-3.658	1.366	-2.677	0.173724	0.90108	0.00524672	0.553379	0.0162642	1	0	1	0	0	Oo
14229	7.1721	7.83035	8.07543	8.71555	8.76345	1.72	1.1925	1.5685	1.034	1.6245	0.364546	0.342409	0.00504691	0.832009	0.00173313	0.5	0	0.5	1	1	Oo
14235	7.16299	8.00093	7.90277	7.99326	8.45563	1.7945	-1.0705	1.065	1.3965	1.4805	0.00105953	0.741712	0.721989	0.16773	0.0280007	1	0	1	1	1	OoCc
14236	9.1767	9.3111	9.31853	9.40793	9.57568	1.098	1.005	1.064	1.123	1.195	0.346298	0.97563	0.672635	0.404475	0.109258	1	1	1	1	1	OoMur
14245	7.50079	7.38458	6.96502	5.73218	5.76669	-0.0875	-1.338	-2.35	0.031	-2.3745	0.689785	0.118825	0.000480748	0.205638	0.00485782	1	1	1	0	0	Oo
14248	8.09412	8.57132	8.05553	7.86125	8.2066	1.394	-1.4315	-1.145	1.275	1.1115	0.0329097	0.0459617	0.47046	0.213951	0.520327	1	0.5	1	1	1	Oo
14251	7.15707	7.06533	7.3913	7.42421	7.26888	-1.066	1.254	1.023	-1.114	-1.089	0.518694	0.0576723	0.883721	0.437162	0.454277	1	0	1	1	1	Oo
14252	8.26217	9.43484	8.92558	8.6408	8.56092	2.268	-1.4235	-1.234	-0.059	-1.2945	1.45169e-05	0.0323602	0.446069	0.783917	0.174778	1	0.5	1	1	1	Oo
14254	4.62536	5.2743	5.6509	6.90552	7.56587	1.568	1.298	2.386	1.58	3.771	0.222918	0.629754	0.0607278	0.433714	0.00283512	0	0	0	0	1	OoCc
14260	5.88652	3.55561	4.63794	5.30277	5.4057	-5.031	2.117	1.585	1.074	1.703	0.00396625	0.269235	0.539873	0.957426	0.396818	0	0	0	0	1	OoMur
14261	5.96754	5.89613	6.13394	5.81897	6.25086	-1.051	1.179	-1.244	1.349	1.084	0.717422	0.325517	0.206748	0.0948583	0.612822	0	0	1	0	1	Oo
14263	3.63225	5.01144	5.33512	5.46691	5.45479	3.093	1.258	0.101	-0.011	0.0985	0.070381	0.568326	0.827337	0.489343	0.590441	0	0	0	0.5	1	OoMur
14265	9.32387	7.67679	7.24607	6.61869	5.99622	-3.132	-1.348	-1.545	-1.54	-2.378	9.72689e-08	0.0759565	0.0137669	0.0248166	1.43395e-05	1	1	1	1	1	OoCc
14266	5.36641	5.68077	5.33795	5.47408	6.01911	1.273	-1.2685	1.0995	1.549	1.7235	0.516902	0.499752	0.835355	0.536767	0.377387	0.5	0.5	0	0.5	0.5	OoCcMur
14268	8.03673	7.48509	7.36502	7.65025	7.63768	-1.466	-1.087	1.219	-1.009	1.208	0.000595451	0.519269	0.11416	0.958756	0.0871743	0	0	0	1	1	Oo
14269	7.76037	6.28814	5.3272	4.92934	5.73178	-2.7905	-2.011	-0.3715	1.944	1.3475	0.0130009	0.0313663	0.623351	0.361936	0.398173	0	1	0	0	0	OoMur
14270	8.28934	8.47012	8.22812	8.20697	8.18497	0.477667	-1.18933	-0.349	0.313667	-0.367	0.384676	0.388136	0.735089	0.59106	0.488246	1	0.666667	0.666667	0.666667	1	Oo
14272	11.3561	10.5024	10.9047	11.2675	11.0545	-1.8635	1.3215	1.2875	-1.161	1.1095	0.000549767	0.00859446	0.0176862	0.262597	0.272288	1	1	1	1	1	Oo
14281	8.64767	6.17644	5.57517	5.36341	5.85649	-5.545	-1.517	-1.158	1.407	1.215	1.93681e-07	0.116494	0.646416	0.248122	0.441488	0	1	0	0	0	OoMur
14282	5.73871	4.67811	4.60272	4.46454	5.0018	-2.086	-1.054	-1.101	1.451	1.319	0.0237362	0.915544	0.844941	0.40324	0.451576	0	1	0	0	0	Oo
14284	5.67596	6.53205	6.1302	6.14154	6.17692	1.81	-1.321	1.008	1.025	1.033	7.14622e-05	0.0636642	0.969345	0.907277	0.835923	1	0	0	0	0	OoMur
14287	7.3899	8.505	9.09907	8.94314	8.63092	2.166	1.509	-1.114	-1.242	-1.383	1.00145e-06	0.00456355	0.48689	0.148054	0.0123785	1	0	1	1	1	Oo
14300	8.0323	7.07658	7.18972	7.16785	7.18193	-1.9555	0.0865	-0.017	0.012	-0.0075	0.00017974	0.591634	0.654536	0.323653	0.0761066	0.5	1	0.5	0.5	1	Oo
14309	5.69884	5.65798	5.74626	5.6405	5.87757	-1.029	1.063	-1.076	1.179	1.095	0.811217	0.699868	0.663661	0.296094	0.495651	0	0	0	0	1	Oo
14312	8.73648	8.0949	7.93257	8.23283	8.09966	-1.56	-1.119	1.231	-1.097	1.123	0.000335899	0.414926	0.12966	0.562741	0.347382	1	1	1	1	1	Oo
14319	9.57303	9.10546	8.75857	8.6879	8.87532	-1.418	-1.272	-1.05	1.146	0.0895	0.206343	0.0606524	0.740858	0.490282	0.478169	1	1	1	1	1	Oo
14325	7.7558	5.96731	5.63459	4.54702	5.19786	-3.455	-1.259	-2.125	1.57	-1.354	1.37889e-07	0.223181	0.000467842	0.0335921	0.0799711	1	1	0	0	0	Oo
14339	6.3798	5.40441	5.81467	5.52294	5.35201	-2.41	1.3385	-1.2425	-1.127	-1.3895	0.465875	0.284569	0.535911	0.6745	0.191368	1	0.5	1	1	1	Oo
14356	8.02552	8.56431	8.53311	8.42847	8.586	1.483	-1.022	-1.075	1.11567	0.371333	0.159286	0.910486	0.683769	0.538863	0.795579	1	0.666667	1	1	1	Oo
14359	8.33515	8.70846	8.63198	8.59793	8.88052	0.87625	-0.06475	-0.52475	0.741	0.7015	0.047444	0.526017	0.731553	0.302699	0.410143	1	1	1	1	1	Oo
14360	8.15743	8.38477	8.72723	8.7956	8.92916	1.1755	1.276	1.049	1.098	1.1505	0.251668	0.15466	0.742445	0.507264	0.189524	1	1	1	1	1	Oo
14362	7.53124	7.26595	7.38542	7.12524	7.41664	-1.202	1.086	-1.198	1.224	1.022	0.302092	0.764622	0.476005	0.480556	0.933082	0	0	0	0	1	Oo
14365	7.23152	7.3687	7.53054	7.50556	7.14302	0.448	1.11967	0.311333	-1.293	-1.335	0.105398	0.508355	0.576503	0.256004	0.286529	0.666667	0.333333	1	0.666667	0.666667	OoCc
14367	10.2763	10.1004	9.0109	6.36396	4.82877	-1.13	-2.128	-6.263	-2.898	-18.153	0.755986	0.11255	0.000450939	0.0510022	1.25715e-06	1	1	1	0	0	Oo
14369	3.86072	5.94341	6.26616	6.27919	7.00494	4.236	1.251	1.009	1.654	1.669	4.54743e-09	0.188542	0.968607	0.0111808	0.00240599	1	0	1	1	1	Oo
14375	8.71169	8.30041	8.43337	8.51619	8.58448	-1.33	1.097	1.059	1.048	1.11	0.00622592	0.469335	0.694583	0.76154	0.352317	1	1	1	1	1	Oo
14376	7.03496	6.90896	6.56438	6.70693	6.89754	-1.091	-1.27	1.104	1.141	1.26	0.618198	0.262855	0.700058	0.608499	0.234779	1	0	0	1	1	Oo
14381	9.29858	11.3419	11.2774	11.2882	11.1951	4.122	-1.046	1.008	-1.067	-1.059	1.37559e-11	0.721556	0.960732	0.632758	0.59497	1	1	1	1	1	Oo
14387	7.63927	7.44279	6.75957	6.69959	6.76613	-1.146	-1.606	-1.042	1.047	1.005	0.238799	0.00217849	0.81651	0.807519	0.976216	1	1	1	1	1	OoCcMur
14388	7.7169	5.69719	5.00405	3.41805	5.19243	-4.055	-1.617	-3.002	3.421	1.139	0.000170214	0.215908	0.00723233	0.00733354	0.73759	0	1	0	0	0	Oo
14389	10.3254	10.2293	10.1884	10.0888	10.2992	-1.069	-1.029	-1.071	1.157	1.08	0.563007	0.881816	0.689775	0.412667	0.59201	1	1	1	1	1	Oo
14390	6.90467	5.42223	5.29008	3.93021	3.48755	-3.3165	-1.096	-2.748	-0.598	-3.624	0.000585692	0.678274	0.00171448	0.235619	0.00603243	1	1	0.5	0	0	Oo
14391	6.43673	6.97034	7.32813	7.27854	7.75511	1.4485	1.2915	-1.035	1.402	1.356	0.00828183	0.227981	0.861278	0.109233	0.118664	0.5	0.5	1	1	1	OoCc
14396	6.14014	6.51799	5.96155	6.89309	8.01923	1.299	-1.471	1.907	2.183	4.163	0.351674	0.294182	0.0674444	0.0521305	0.000123532	0	0	0	0	1	Oo
14401	6.20895	5.99935	5.62381	5.9503	6.03236	-1.156	-1.297	1.254	1.059	1.327	0.238919	0.0841794	0.154818	0.773098	0.0432134	0	1	0	1	1	OoMur
14402	5.15084	6.79466	6.46568	6.06057	5.81683	5.1135	-0.3115	-0.4375	-0.216	-0.9115	0.420608	0.543086	0.418533	0.663263	0.269188	0.5	0	0	0	0.5	Oo
14407	6.81438	6.89013	6.8945	7.17649	7.34752	1.054	1.003	1.216	1.126	1.369	0.754043	0.992172	0.376676	0.679177	0.0909071	1	1	1	1	1	Oo
14417	4.91352	5.3812	5.37036	5.34426	5.61116	1.383	-1.008	-1.018	1.203	1.182	0.0732433	0.980729	0.953013	0.473769	0.42224	1	0	1	0	1	Oo
14420	5.12825	5.82678	5.44148	6.02116	5.73693	1.623	-1.306	1.495	-1.218	1.227	0.00185791	0.122184	0.0255527	0.31524	0.200976	1	0	1	0	1	Oo
14422	6.11002	6.13484	6.11315	6.53915	6.2868	1.017	-1.015	1.344	-1.191	1.128	0.886212	0.93341	0.0379073	0.25183	0.351152	1	1	1	1	1	Oo
14423	7.29154	7.21489	7.37074	7.18504	6.56436	-1.0555	1.1175	-1.1375	-1.601	-1.83	0.69607	0.738302	0.610879	0.220687	0.0312383	1	0	1	0.5	0.5	Oo
14425	6.57227	6.57961	7.33312	7.00245	6.68356	1.005	1.686	-1.258	-1.247	-1.569	0.968102	0.0013166	0.135137	0.169849	0.00206873	1	0	1	1	1	Oo
14430	7.9425	7.30754	7.48518	7.30129	7.23127	-1.553	1.131	-1.136	-1.05	-1.192	6.68318e-06	0.174436	0.183269	0.669922	0.0363934	1	1	1	1	1	Oo
14450	7.21792	6.09536	6.18407	5.60873	5.65799	-2.177	0.066	-1.4995	0.0355	-1.444	3.4763e-06	0.68178	0.00924722	0.842503	0.00605103	1	0.5	1	0	0.5	Oo
14453	7.41407	6.3459	6.22567	5.58239	5.70182	-2.4955	-0.093	-0.7365	1.0895	-0.64	0.114019	0.804392	0.469589	0.672125	0.0873229	0.5	1	0.5	0.5	0.5	Oo
14455	7.28128	5.79945	6.28726	6.79495	6.5096	-2.8025	1.404	1.4235	-0.2475	0.1825	8.30738e-06	0.0867984	0.0467	0.496095	0.481937	0	1	0.5	1	1	Oo
14456	6.16409	7.02263	6.97189	6.79486	6.71633	1.813	-1.036	-1.131	-1.056	-1.194	3.84399e-05	0.83832	0.445604	0.769856	0.177518	1	0	1	1	1	OoMur
14462	3.07479	1.31172	4.56698	5.52562	6.20934	-3.394	9.548	1.943	1.606	3.122	0.00167187	3.61836e-05	0.142937	0.3322	0.00634578	0	0	0	0	1	Oo
14463	5.43798	5.68088	6.41906	6.56926	6.7502	1.183	1.668	1.11	1.134	1.258	0.17093	0.00189457	0.552031	0.478627	0.0972249	0	0	1	1	1	OoMur
14465	5.02846	5.05473	5.41762	5.45298	5.46726	0.0265	0.377	0.028	0.0105	0.0415	0.0336904	0.278981	0.584381	0.856033	0.3418	0	0	0.5	0	0.5	Oo
14466	8.42977	6.47907	6.53964	6.22041	6.39993	-3.866	1.043	-1.248	1.133	-1.102	4.48849e-08	0.853835	0.273971	0.588984	0.600616	1	1	0	0	0	Oo
14467	8.58111	7.42217	7.35245	7.41441	7.8183	-2.233	-1.05	1.044	1.323	1.381	5.4571e-08	0.709362	0.762691	0.0295865	0.00374424	1	1	1	1	1	Oo
14470	8.23749	6.9259	6.70552	6.67587	6.84133	-2.482	-1.165	-1.021	1.122	1.099	4.38599e-06	0.422268	0.934235	0.606229	0.595537	1	0	0	1	1	Oo
14472	4.52004	8.40625	8.69605	8.58378	8.60639	14.786	1.222	-1.081	1.016	-1.064	2.32034e-12	0.28287	0.731185	0.950578	0.737045	1	0	1	1	1	Oo
14479	8.9585	9.185	9.03003	9.05206	8.94035	1.17075	-0.621	0.02175	-0.08725	-0.0735	0.2698	0.497841	0.593963	0.670909	0.298594	1	0.75	1	1	1	Oo
14489	8.49697	7.53211	7.24099	7.34117	7.24258	-2.0454	-0.834	1.0736	-0.675	-0.1986	0.112515	0.288703	0.748127	0.538102	0.530334	0.8	1	0.6	0.6	0.6	Oo
14528	5.86079	7.30446	7.81948	7.92551	8.0674	2.722	1.511	0.084	0.1175	0.236	3.06401e-05	0.474071	0.53823	0.402985	0.0822029	1	1	1	1	1	OoCcMur
14534	6.83516	7.13018	6.92503	6.73898	7.16632	1.2295	-1.153	-0.162	1.368	1.183	0.231609	0.497507	0.382391	0.32742	0.379119	1	0.5	1	0.5	1	OoCc
14536	8.11011	9.99173	9.70851	10.0476	10.0019	3.689	-1.22	1.2705	-0.0415	1.2475	1.84285e-09	0.244162	0.192481	0.0972022	0.461033	1	0	1	1	1	Oo
14538	3.99387	4.83608	5.56612	6.33348	5.89111	1.793	1.659	1.702	-1.359	1.253	0.000397742	0.00631511	0.00473469	0.112185	0.163674	0	0	1	1	1	Oo
14544	9.54727	9.74605	9.45931	9.56554	9.64711	0.496667	-1.22567	0.422	0.394333	-0.164667	0.158771	0.284161	0.475025	0.593979	0.583207	1	1	0.666667	1	1	Oo
14545	6.03195	7.26488	7.98855	8.62114	8.61835	2.57967	1.72167	1.56467	0.330333	1.55	0.0271258	0.187376	0.0701325	0.750153	0.0253402	1	0.666667	1	1	1	Oo
14546	6.25232	2.19928	1.90485	1.9858	2.91983	-16.599	-1.226	1.058	1.911	2.021	1.13536e-05	0.770423	0.948113	0.345594	0.207602	0	1	0	0	0	Oo
14547	8.59592	8.41264	8.42022	8.2999	8.38751	-1.135	1.005	-1.087	1.063	-1.023	0.0758335	0.96444	0.38353	0.564933	0.800666	1	1	1	1	1	Oo
14548	8.73575	9.12042	9.44548	9.6672	9.63766	1.306	1.253	1.166	-1.021	1.142	0.0071293	0.0496948	0.206498	0.898242	0.207428	1	1	1	1	1	Oo
14566	10.4707	13.2351	13.2338	13.1978	12.9823	6.795	-1.001	-1.025	-1.161	-1.19	1.12605e-14	0.993684	0.825243	0.127796	0.0361649	1	1	1	1	1	OoCc
14567	8.38153	7.22337	6.67058	6.58842	6.58385	-2.232	-1.467	-1.059	-1.003	-1.062	8.41744e-06	0.0249175	0.786579	0.989625	0.723238	1	1	1	1	1	Oo
14569	9.87712	8.81366	8.8929	9.3301	9.39544	-2.13117	0.392667	1.36217	0.0566667	1.4445	3.95543e-05	0.559407	0.121269	0.542064	0.168243	0.833333	0.833333	0.833333	0.833333	1	Oo
14583	8.48884	8.12771	7.78531	7.11862	7.1812	-0.582	-0.4165	-1.5965	0.0505	-1.573	0.000578967	0.0543366	0.0420483	0.451147	0.202952	0.5	0.5	1	0.5	1	Oo
14585	7.07548	7.10559	7.44657	9.07846	9.17566	1.021	1.267	3.099	1.07	3.315	0.872657	0.126549	3.71592e-07	0.767975	6.9243e-08	0	0	0	1	1	Oo
14588	6.20283	7.07853	7.11088	6.983	6.77586	1.835	1.023	-1.093	-1.154	-1.261	5.67754e-07	0.857255	0.44431	0.205999	0.0164469	1	0	1	0	0	Oo
14590	4.91272	4.13279	4.02521	4.44163	3.88312	-1.717	-1.077	1.335	-1.473	-1.104	0.0830112	0.872609	0.50673	0.371029	0.801527	0	1	0	0	0	Oo
14593	6.08669	5.80783	5.39144	5.44133	5.3709	-0.579667	-0.757667	-0.279333	-0.385667	-0.344333	0.362639	0.473146	0.321753	0.651226	0.254767	0.333333	0.666667	0	0	0.333333	Oo
14594	4.34259	7.84246	9.03021	9.64181	9.79342	11.313	2.278	1.528	1.111	1.697	8.71981e-12	0.000149033	0.0242872	0.640559	0.00311707	1	1	1	1	1	Oo
14598	3.76931	5.66864	7.22939	7.65101	7.55653	3.73	2.95	1.339	-1.068	1.255	2.46419e-07	3.86279e-05	0.185692	0.815226	0.240073	0	0	1	1	1	Oo
14609	3.17339	1.76028	1.81621	5.00778	6.55334	-4.4108	-0.0462	12.0486	3.0462	37.9702	0.243343	0.274309	0.0105023	0.0792632	9.14346e-06	0	0	0	0.4	1	OoCc
14612	8.64661	10.8956	11.3845	11.2987	11.2314	4.754	1.403	-1.061	-1.048	-1.112	1.98276e-12	0.00275849	0.634574	0.727933	0.275475	1	1	1	1	1	Oo
14615	7.47744	6.08361	6.49094	4.54983	4.22491	-3.111	1.3585	-4.278	-1.2615	-5.6765	0.376344	0.635357	0.00308632	0.689187	0.000416665	0.5	1	0.5	0.5	0	OoCc
14625	0.804302	3.36528	5.56358	5.38756	4.13039	5.901	4.589	-1.13	-2.39	-2.7	4.31916e-05	0.0013844	0.822172	0.067568	0.0144822	0	0	1	1	0	Oo
14628	11.2738	10.8558	10.2001	8.84402	8.27797	-1.336	-1.575	-2.56	-1.48	-3.79	0.00284757	0.000342943	9.07408e-08	0.00417213	3.19063e-10	1	1	1	1	0	Oo
14629	6.76776	6.34487	6.28575	5.99587	5.99282	-1.341	-0.0445	-1.242	-0.0025	-1.2285	0.0196831	0.598219	0.45781	0.545764	0.195393	1	1	1	0.5	1	Oo
14630	9.70373	8.44707	7.92654	7.83849	7.87892	-2.389	-1.434	-1.063	1.028	-1.034	7.2381e-07	0.0184343	0.743858	0.893697	0.832596	1	1	1	1	1	Oo
14634	6.46975	9.71347	10.219	10.3428	9.77315	26.4615	1.4415	1.092	-1.5145	-1.4115	3.59267e-05	0.217259	0.65139	0.234193	0.451941	1	0	1	1	1	Oo
14635	7.36339	6.87108	6.17539	6.15357	6.0412	-1.407	-1.62	-1.015	-1.081	-1.097	0.0274683	0.0114811	0.953258	0.742797	0.608437	1	1	1	0	0	Oo
14645	8.29881	6.73506	6.27233	5.97827	5.6464	-2.956	-1.378	-1.226	-1.259	-1.543	1.90175e-07	0.056882	0.25867	0.218247	0.00737393	1	1	1	1	1	Oo
14651	7.61584	7.30805	7.46509	6.67059	6.54824	-0.628	0.454	-1.78533	-1.08867	-1.95333	0.238265	0.3837	0.00611394	0.61683	0.00104231	1	0.333333	1	0.666667	0.666667	Oo
14660	9.08427	8.89456	8.34432	7.75573	7.53475	-0.177	-1.4735	-1.506	-1.166	-1.7585	0.12056	0.0220512	0.00855369	0.429771	0.000333681	1	1	0.5	0.5	1	Oo
14661	8.3731	7.93005	7.90854	7.871	8.07978	-0.435	-0.015	-1.0265	1.1585	1.128	0.377494	0.79015	0.861969	0.317464	0.310594	1	1	1	1	1	Oo
14664	9.33628	10.0732	9.58703	9.57551	9.85714	1.667	-1.401	-1.008	1.216	1.206	0.000227522	0.0220355	0.967546	0.223989	0.160701	1	1	1	1	1	Oo
14670	5.57729	4.54834	4.92133	4.50173	4.57667	-2.041	1.295	-1.338	1.053	-1.27	2.62952e-06	0.0574752	0.0389757	0.769856	0.056864	1	1	0	0	1	OoMur
14672	7.88366	6.95869	6.65601	6.03735	6.09445	-1.9475	-1.235	-1.551	0.049	-1.48	0.000404193	0.158489	0.0226356	0.163718	0.00757879	1	1	0.5	0	0	Oo
14674	8.02943	7.42729	7.18653	7.63153	7.73211	-1.147	-1.18675	1.3975	0.0785	1.50775	0.275249	0.42523	0.289879	0.689596	0.170359	1	1	0.75	1	1	OoCc
14675	5.88279	7.66331	8.03391	8.48165	8.52765	3.435	1.293	1.364	1.032	1.408	5.39935e-10	0.0400516	0.0167737	0.854507	0.00469367	1	0	1	1	1	OoCc
14677	7.19669	7.55777	7.4882	7.82505	7.56636	0.706667	-0.386667	1.26533	-0.574	0.391333	0.348995	0.428767	0.222085	0.493809	0.108114	1	1	1	1	1	Oo
14678	6.99639	7.62207	7.58725	7.48543	7.62978	1.5485	-0.0255	-1.0755	1.105	0.0315	0.0010231	0.717083	0.641121	0.547602	0.651685	1	1	1	1	1	Oo
14679	7.56894	7.94151	7.91852	7.80005	8.00531	0.363	-0.0165	-1.0855	0.1705	0.072	0.271688	0.719432	0.522102	0.404085	0.108649	1	1	1	1	1	Oo
14681	5.48664	5.42292	5.31597	5.59528	4.9488	-1.045	-1.077	1.214	-1.565	-1.29	0.823682	0.785577	0.461812	0.081528	0.236696	0	1	0	0	1	Oo
14682	7.24081	8.36499	8.25188	7.63392	7.43462	2.54375	0.38125	-1.548	-0.658	-1.81375	0.0176538	0.619313	0.0643248	0.562381	0.0331005	1	0.5	1	0.5	0.5	Oo
14683	9.80441	10.7965	10.4391	9.90504	9.66134	1.989	-1.281	-1.448	-1.184	-1.714	6.20974e-08	0.0141599	0.000826884	0.117055	6.68393e-06	1	1	1	1	1	Oo
14686	4.97868	5.29297	6.73664	6.74761	7.07998	1.243	2.72	1.008	1.259	1.269	0.301096	0.000659257	0.983172	0.443899	0.324936	0	0	1	1	1	Oo
14687	6.02028	5.88858	5.5825	5.68628	6.12807	-1.096	-1.236	1.075	1.358	1.46	0.508209	0.205507	0.72684	0.095662	0.0162532	0	0	0	0	1	OoMur
14688	8.27247	8.48853	7.68229	7.03836	7.02546	0.222	-1.766	-1.6175	-0.0095	-1.638	0.0039458	0.000358089	0.0470498	0.94426	0.0334329	1	1	1	1	1	Oo
14693	4.49248	5.69989	5.71705	5.59755	6.0333	2.309	1.012	-1.086	1.353	1.245	0.000764815	0.974784	0.808397	0.323892	0.39025	0	0	1	0	1	Oo
14694	10.9376	10.1667	9.88507	9.64573	9.47475	-1.706	-1.216	-1.18	-1.126	-1.329	3.01581e-05	0.117286	0.212825	0.413319	0.0160367	1	1	1	1	1	Oo
14696	7.96935	9.2058	9.04665	9.22432	9.10321	2.538	-0.456667	0.469	-1.08867	0.375667	0.00313262	0.636502	0.558406	0.658774	0.724322	1	0.666667	1	1	1	OoCc
14701	8.09012	8.82352	8.79167	8.84332	8.81644	1.816	-0.023	0.0395	-1.019	0.019	0.108545	0.758004	0.378043	0.898238	0.262282	1	1	1	1	1	OoCcMur
14704	6.86217	9.72111	9.6808	9.49197	9.24587	7.255	-1.028	-1.14	-1.186	-1.352	4.99557e-11	0.894289	0.495688	0.37506	0.0521088	1	0	1	1	1	Oo
14705	6.50722	10.2128	10.3428	10.0259	9.63451	24.838	0.1	-1.2485	-1.312	-1.636	6.90122e-09	0.58751	0.24093	0.126407	0.00339215	1	0.5	1	1	1	Oo
14706	6.55634	7.04673	7.27283	7.42471	7.13289	1.405	1.17	1.111	-1.224	-1.102	0.0332241	0.467157	0.653792	0.412667	0.629131	0	0	1	0	1	Oo
14707	10.9679	9.58044	9.19413	8.97255	9.17653	-2.616	-1.307	-1.166	1.152	-1.012	3.47053e-08	0.0426655	0.277144	0.343494	0.930435	1	1	1	1	1	OoMur
14715	5.33063	5.48481	5.65768	5.8528	5.68896	1.113	1.127	1.145	-1.12	1.022	0.548864	0.6141	0.593903	0.675565	0.925476	1	1	1	0	1	OoCcMur
14718	3.32945	6.09409	7.09085	7.08954	7.17378	6.796	1.996	-1.001	1.06	1.059	8.48232e-09	0.00558981	0.997883	0.858953	0.814842	1	0	1	1	1	Oo
14719	9.35195	9.04586	9.37937	9.69619	9.34058	-1.236	1.26	1.246	-1.28	-1.027	0.00319863	0.00696888	0.0104607	0.0101442	0.744643	1	1	1	1	1	Oo
14724	6.05532	5.77247	6.01106	6.14367	6.0226	-1.217	1.18	1.096	-1.088	1.008	0.199458	0.398333	0.685237	0.725979	0.967804	0	1	0	0	0	Oo
14725	8.12961	7.53654	7.41649	7.35009	7.39641	-1.508	-1.087	-1.047	1.033	-1.014	0.00798509	0.70715	0.855086	0.927827	0.947085	0	1	0	1	1	Oo
14726	8.39452	8.61127	9.02708	9.17468	9.12673	1.162	1.334	1.108	-1.034	1.072	0.274486	0.0859983	0.606838	0.886599	0.680093	1	1	1	1	1	OoCc
14729	6.21455	6.448	5.85906	6.02731	5.87133	1.176	-1.504	1.124	-1.114	1.009	0.207972	0.0119618	0.519191	0.572767	0.960425	1	0	0	1	0	Oo
14732	8.35428	7.50634	7.8458	7.48085	6.79139	-1.8	1.265	-1.288	-1.613	-2.077	5.96906e-06	0.0502426	0.0412953	0.00172966	1.9345e-06	1	1	1	0	0	Oo
14745	7.1556	6.67309	7.18912	7.36681	6.77385	-1.397	1.43	1.131	-1.508	-1.334	0.0714545	0.110159	0.648552	0.0970409	0.164776	0	0	1	0	0	OoCcMur
14748	5.43853	7.94702	8.06802	8.00843	8.21021	5.69	1.087	-1.042	1.15	1.104	2.27556e-10	0.647085	0.843376	0.470248	0.534791	0	0	1	1	1	Oo
14751	9.36318	8.37652	8.19757	7.92026	8.12551	-2.002	-1.133	-1.22133	0.495	-1.052	2.97783e-05	0.435535	0.374145	0.448529	0.738021	1	1	1	0.666667	1	Oo
14755	8.97832	9.48039	9.91227	9.77415	9.52703	1.41825	1.3505	-1.10125	-1.187	-1.308	0.00264498	0.0102768	0.422641	0.176446	0.0535048	1	0.75	1	1	1	OoCc
14756	6.20118	7.02048	6.20778	5.6637	5.96682	1.765	-1.756	-1.458	1.234	-1.182	0.000467046	0.00272359	0.036053	0.280954	0.302346	1	1	0	0	0	Oo
14760	8.27308	8.10336	8.14482	8.19088	7.55159	-1.125	1.029	1.032	-1.558	-1.509	0.231808	0.843713	0.833435	0.00301292	0.00088408	1	1	1	1	1	Oo
14766	4.44713	7.30908	7.13449	7.42885	7.80726	7.313	-1.1305	1.23	1.31	1.6275	7.0011e-09	0.62811	0.440805	0.373616	0.117468	1	0	1	0.5	1	OoMur
14768	8.27654	8.83057	9.16153	9.21759	9.1012	1.4705	1.2625	0.0405	-0.09	-0.0485	0.0360382	0.228835	0.880644	0.563597	0.369405	1	0.5	1	1	1	Oo
14773	4.62292	5.31963	6.01611	6.10127	6.57317	1.621	1.621	1.061	1.387	1.471	0.00411252	0.0143075	0.807327	0.119978	0.0306102	0	1	1	1	1	Oo
14775	7.44348	6.92247	6.73563	5.96569	5.9038	-1.435	-1.138	-1.705	-1.044	-1.78	0.0008515	0.282157	0.000151055	0.782739	2.52636e-05	1	1	1	0	0	Oo
14782	7.0977	6.31435	5.07809	4.90132	5.14658	-1.721	-2.356	-1.13	1.185	1.049	0.00145111	0.000149033	0.580306	0.438777	0.808126	1	1	0	0	0	Oo
14783	7.78549	8.91181	7.73976	7.50706	7.7092	2.183	-2.253	-1.175	1.15	-1.021	5.17189e-05	0.000288451	0.457687	0.546894	0.918567	1	1	1	1	1	Oo
14784	6.91988	6.10485	6.10413	5.89207	5.98818	-1.9685	-0.0005	-0.183	1.069	-0.099	0.162794	0.325238	0.521535	0.779595	0.347324	0.5	1	0.5	0.5	0.5	OoMur
14791	8.1072	9.78768	10.0283	10.0853	9.80447	3.205	1.182	1.04	-1.215	-1.168	2.65636e-09	0.207137	0.813078	0.179926	0.201618	1	0	1	1	1	Oo
14793	6.43089	6.26565	6.50083	6.66772	6.3759	0.177333	1.18533	1.12333	-1.23033	-0.430667	0.407983	0.489309	0.569543	0.397325	0.57329	0.333333	0.666667	0.666667	1	1	Oo
14799	6.23183	6.49614	6.07374	6.24407	5.89678	1.201	-1.34	1.125	-1.272	-1.131	0.477394	0.390001	0.772889	0.569966	0.716855	0	1	0	0	0	Oo
14802	5.95543	6.13461	6.42937	6.66018	6.47851	1.134	1.2275	1.178	-0.1465	0.0435	0.585996	0.493768	0.610344	0.706469	0.352631	0.5	0	0.5	1	1	Oo
14804	8.06624	6.65082	5.45776	5.35512	5.77379	-2.772	-2.3575	-1.075	1.387	0.304	0.00129911	0.0122964	0.71293	0.619424	0.337694	0.5	1	0	0	0	Oo
14815	6.04296	4.98652	4.64445	4.97589	4.85881	-2.1035	-1.271	1.2585	-0.092	1.165	0.00743543	0.411755	0.435226	0.724529	0.60106	0	1	0	0	0.5	OoMur
14824	6.22476	8.11826	9.11022	9.05763	8.82883	5.075	2.00833	-0.372	-1.17433	-1.226	1.37721e-05	0.00222747	0.737902	0.481638	0.379995	0.666667	0.333333	1	0.666667	0.666667	Oo
14825	8.32908	8.26117	8.00297	8.12774	8.4924	-1.048	-1.196	1.09	1.288	1.404	0.758136	0.36502	0.705926	0.254868	0.0454088	1	1	1	0	1	OoCcMur
14827	7.87813	8.27238	7.73642	7.67108	7.77635	1.3225	-1.4795	-0.051	0.0865	0.029	0.108217	0.175968	0.540726	0.425827	0.749722	1	0.5	1	1	1	Oo
14828	10.1406	10.3456	10.0229	9.96912	9.99824	0.605333	-1.25167	-0.373667	-0.308333	-0.348667	0.237296	0.118223	0.608443	0.449994	0.145252	1	1	0.666667	0.666667	0.666667	Oo
14829	4.90027	5.25566	5.20484	5.57082	5.21828	1.279	-1.036	1.289	-1.277	1.009	0.053005	0.849908	0.112696	0.146627	0.955092	1	0	0	0	0	Oo
14841	6.19755	7.47577	8.28085	8.47158	8.24852	2.425	1.747	1.141	-1.167	-1.023	1.31296e-07	0.000334813	0.368278	0.306287	0.873845	1	1	1	1	1	Oo
14852	7.39955	7.21855	7.03764	6.94189	6.98245	-0.0578	-0.7432	-0.2902	0.232	0.5028	0.0467843	0.50002	0.680676	0.607033	0.391935	0.6	0.8	0.6	0.6	0.6	Oo
14853	8.03975	8.48805	8.60035	8.77994	8.81978	0.573	0.111	1.133	1.028	1.165	0.0292802	0.0694611	0.399448	0.899075	0.222938	1	1	1	1	1	OoCc
14854	8.69705	8.07381	7.94724	7.80538	7.54289	-1.54	-1.092	-1.103	-1.2	-1.323	0.00603307	0.692776	0.659432	0.440281	0.0988755	0	1	0	0	0	Oo
14858	5.11481	5.84017	6.09365	6.66151	6.47906	1.653	1.192	1.482	-1.135	1.306	0.00123347	0.31941	0.0267466	0.541738	0.0906081	0	0	0	0	1	Oo
14860	9.42464	10.5977	10.3047	9.9757	9.84415	2.255	-1.225	-1.256	-1.095	-1.376	3.1367e-09	0.0304527	0.0185286	0.394627	0.000835209	1	1	1	1	1	OoCcMur
14866	8.27008	9.59751	9.7985	9.52842	9.40322	2.51	1.149	-1.206	-1.091	-1.315	2.8852e-09	0.18326	0.0845119	0.480492	0.00656208	1	1	1	1	1	Oo
14870	8.6232	8.64075	8.30238	8.00918	8.18034	1.012	-1.264	-1.225	1.126	-1.088	0.900367	0.0352532	0.0765848	0.34467	0.419373	1	1	1	1	1	Oo
14872	7.0664	8.09272	8.46557	8.12034	7.7837	2.037	1.295	-1.27	-1.263	-1.604	0.000519374	0.246001	0.31533	0.350247	0.0218708	1	1	1	1	1	OoCc
14873	8.41795	5.98477	4.86693	3.99588	5.04204	-5.401	-2.17	-1.829	2.065	1.129	1.43939e-07	0.00452052	0.0232873	0.0148338	0.631427	1	1	1	0	1	OoCcMur
14884	8.32418	8.10233	8.11569	8.42318	8.06779	-1.166	1.009	1.238	-1.279	-1.034	0.0796986	0.946948	0.0533972	0.0399551	0.75878	1	1	1	1	1	Oo
14885	8.01862	6.47691	6.96752	6.61283	6.01001	-2.97133	1.408	-1.287	-1.52133	-1.94667	1.15268e-05	0.0775704	0.306996	0.052167	0.00118613	1	0.333333	1	1	1	Oo
14886	7.84735	6.80935	6.18388	5.68333	5.41798	-2.053	-1.543	-1.415	-1.202	-1.7	5.27349e-05	0.016883	0.0588716	0.362589	0.00255616	1	1	0	0	0	Oo
14894	7.87196	7.07199	7.4938	7.37	6.97941	-1.747	1.3395	-1.0915	-1.311	-1.433	0.000662224	0.07958	0.662889	0.141695	0.0406813	1	0.5	1	1	1	Oo
14897	8.37629	8.4155	8.00171	8.01406	8.01892	0.0214	-1.3458	-0.1894	0.5684	0.2048	0.0756392	0.21281	0.653275	0.348305	0.368769	1	0.8	0.8	0.8	1	Oo
14904	5.93103	6.84055	6.36995	6.66153	7.2618	1.878	-1.386	1.224	1.516	1.856	0.0299811	0.3656	0.623288	0.284076	0.0532633	0	0	0	0	1	Oo
14911	9.4268	8.46305	8.66084	8.92901	8.70868	-1.95	1.147	1.204	-1.165	1.034	4.27014e-07	0.217682	0.105595	0.212029	0.767527	1	1	1	1	1	Oo
14917	4.65205	4.92532	5.3252	5.81639	6.41582	1.209	1.319	1.406	1.515	2.13	0.214578	0.136934	0.0789339	0.0466806	0.00018216	0	0	0	1	1	Oo
14923	7.49555	6.51325	6.37302	5.95556	5.58081	-1.976	-1.102	-1.336	-1.297	-1.732	2.49869e-05	0.571186	0.0753476	0.130522	0.000706628	1	1	1	1	1	Oo
14924	6.50772	6.00458	6.05742	5.80903	6.31201	-0.7155	0.0405	-0.2375	1.474	1.1935	0.00845942	0.608844	0.342914	0.499423	0.437054	0.5	0.5	0.5	0.5	0.5	OoCc
14933	6.96247	7.27007	7.55684	7.72487	8.23185	1.2375	1.2265	1.124	1.468	1.639	0.237932	0.445325	0.66808	0.389218	0.152219	1	1	1	1	1	OoCc
14936	5.1304	7.63973	7.45979	7.57647	7.72851	5.694	-1.133	1.084	1.111	1.205	2.21821e-10	0.475894	0.685237	0.602432	0.219919	1	0	1	1	1	OoCcMur
14938	4.14025	4.4692	4.11682	4.00542	4.41254	1.256	-1.277	-1.08	1.326	1.228	0.359565	0.446799	0.841563	0.42338	0.480497	0	1	0	0	0	Oo
14950	5.26872	6.13638	6.64885	6.54306	6.40416	2.1685	1.435	-0.0855	-0.1135	-0.2335	0.00682343	0.2151	0.555897	0.575833	0.154198	0.5	0	1	0.5	0.5	OoCcMur
14958	6.65359	7.77117	7.8942	7.57826	7.65753	2.198	1.089	-0.287	1.0585	-0.2265	0.0421055	0.455412	0.384781	0.71224	0.0811001	0.5	0	1	0.5	1	Oo
14960	5.6223	5.33016	5.97357	7.04783	6.95718	-0.358	1.5625	2.119	-0.07	1.9775	0.0401038	0.045612	0.000967264	0.709488	0.00225861	0	0.5	0.5	1	1	Oo
14964	8.81848	8.26524	6.64701	5.54742	6.07012	-1.467	-3.07	-2.143	1.437	-1.492	0.0136486	6.11997e-06	0.000318092	0.0729126	0.0195336	1	1	0	0	0	Oo
14972	8.88136	9.5159	8.35549	7.29461	7.13797	1.552	-2.235	-2.086	-1.115	-2.325	0.00401073	0.000125495	0.000286023	0.611207	2.75212e-05	1	1	1	1	1	Oo
14977	7.23958	7.01474	7.00654	6.6573	6.30422	-1.169	-1.006	-1.274	-1.277	-1.627	0.195578	0.977936	0.114828	0.12931	0.00115275	1	0	1	1	1	Oo
14979	6.90001	6.70371	6.77818	6.73802	7.15446	-1.146	1.053	-1.028	1.335	1.298	0.194614	0.726269	0.866664	0.0446123	0.0291751	1	1	1	1	1	Oo
14980	9.04692	8.30671	6.52409	4.28655	5.59506	-1.67	-3.441	-4.716	2.477	-1.904	0.114683	0.00367115	0.000599236	0.0416369	0.0777204	0	1	0	0	0	Oo
15001	4.31591	5.51729	6.38209	6.16335	6.40751	2.3	1.821	-1.164	1.184	1.018	0.000896639	0.030203	0.644552	0.614241	0.952644	0	0	1	1	0	Oo
15018	5.18986	4.98683	4.99604	4.86136	4.98786	-1.151	1.006	-1.098	1.092	-1.006	0.292948	0.977678	0.633184	0.670557	0.974513	0	1	0	0	1	Oo
15064	4.95928	4.80909	5.10125	5.09285	5.48626	-1.11	1.224	-1.006	1.313	1.306	0.468476	0.251441	0.980916	0.153343	0.0961777	1	1	1	0	1	Oo
15077	7.5529	7.90135	8.0106	8.00479	8.17709	1.273	1.079	-1.004	1.127	1.122	0.0779655	0.712884	0.986134	0.603276	0.489029	1	1	1	1	1	OoCc
15078	9.5213	9.71675	9.91823	9.94112	10.1199	1.145	1.15	1.016	1.132	1.15	0.243799	0.344844	0.935334	0.45815	0.292333	1	1	1	1	1	Oo
15081	10.4667	10.6501	10.8015	10.5769	10.6357	0.15	1.111	-1.182	0.0455	-1.1235	0.344933	0.384949	0.495705	0.489514	0.342395	1	1	1	1	1	OoMur
15107	8.11799	6.45296	5.00919	4.33505	4.4065	-3.72233	-2.99367	-1.622	0.383333	-0.971333	0.0215037	0.203881	0.233372	0.394725	0.205106	0.666667	0.666667	0.333333	0	0.333333	Oo
15108	8.93075	8.62383	7.50563	5.9315	5.08757	-0.274	-2.1945	-3.014	-1.8335	-5.351	0.406216	0.00157552	7.29156e-06	0.0409561	2.40423e-08	1	1	1	0.5	0	Oo
15115	8.30936	8.16231	7.4172	7.17915	6.94282	-0.147	-1.6795	-1.18	-1.1825	-1.398	0.00160221	0.000317742	0.198674	0.316607	0.0109757	1	1	1	1	1	Oo
15159	7.86912	7.10995	6.43708	6.17885	5.76281	-1.755	-1.599	-0.2165	-1.338	-1.606	0.0490253	0.00379596	0.491842	0.0800423	0.0211658	0.5	1	0.5	0	0	OoMur
15161	7.44595	7.18822	6.57904	6.66297	6.73119	-1.196	-1.525	1.06	1.048	1.111	0.195325	0.0149306	0.782146	0.840142	0.515485	1	1	1	1	1	Oo
15162	6.26521	6.11474	6.66572	6.76393	6.73115	-1.11	1.465	1.07	-1.023	1.046	0.362496	0.00879585	0.688656	0.907688	0.748907	1	1	1	1	1	OoCc
15170	6.82969	6.80867	6.92797	6.78128	6.81101	-1.015	1.086	-1.107	1.021	-1.084	0.932009	0.708885	0.664108	0.938454	0.674046	1	1	1	0	1	Oo
15182	9.13315	8.45519	8.32429	8.02357	8.1163	-1.60667	-0.431	-1.234	1.06833	-0.495333	0.0550574	0.577526	0.383878	0.796811	0.543778	0.666667	1	0.666667	0.666667	0.666667	Oo
15183	7.28782	7.31447	7.13104	6.96652	6.89733	1.019	-1.136	-1.121	-1.049	-1.176	0.846891	0.260816	0.349256	0.738355	0.11355	1	1	1	1	1	Oo
15185	9.59755	7.97933	7.52781	7.31251	7.56892	-3.07	-1.367	-1.161	1.195	1.029	1.017e-08	0.0270474	0.325881	0.252058	0.845439	1	1	1	1	1	Oo
15191	8.92481	7.97358	7.67044	7.89654	8.11766	-1.9345	-1.2345	1.1745	0.197	0.4415	2.22023e-06	0.0960256	0.355687	0.272174	0.416971	1	1	1	1	1	Oo
15192	6.31038	6.05241	5.74043	6.05674	6.23018	-1.196	-1.241	1.245	1.128	1.404	0.446173	0.475894	0.50235	0.743704	0.197504	0	1	0	0	0	Oo
15194	7.49505	7.55331	7.31009	7.32321	7.46028	1.041	-1.184	1.009	1.1	1.11	0.758401	0.28919	0.965951	0.61927	0.48452	1	1	1	1	1	Oo
15201	9.78907	8.56648	8.28161	8.46696	8.63129	-2.705	-0.2475	1.137	1.1255	1.2795	0.00121406	0.437069	0.3287	0.508971	0.113353	1	1	0.5	1	1	OoMur
15204	7.87129	7.75498	7.86289	8.0127	7.72317	-0.201	0.1015	0.124	-0.2595	-1.105	0.000492138	0.306098	0.611659	0.542243	0.749629	0.5	1	0.5	1	0.5	Oo
15211	8.48909	6.56582	5.63519	5.10164	5.24962	-3.793	-1.906	-1.447	1.108	-1.306	1.11746e-06	0.00915379	0.137773	0.737727	0.223097	1	1	0	0	0	Oo
15212	6.84256	1.12682	-1.22151	-0.816746	0.429353	-52.554	-5.092	1.324	2.372	3.14	6.23364e-07	0.0181793	0.737219	0.248701	0.0654578	0	1	0	0	0	Oo
15214	1.4356	2.59859	2.38633	2.43642	3.83507	2.239	-1.159	1.035	2.637	2.73	0.258842	0.893811	0.977547	0.328309	0.213918	0	0	0	0	1	Oo
15227	6.3065	7.7239	8.15884	8.14917	8.13228	2.671	1.352	-1.007	-1.012	-1.019	1.43268e-05	0.178857	0.982796	0.981199	0.942384	1	0	1	1	1	Oo
15239	8.73229	8.53922	8.41382	8.54	8.85141	-1.143	-1.091	1.091	1.241	1.354	0.207477	0.536503	0.56381	0.129271	0.0137363	1	1	1	1	1	Oo
15242	6.68586	9.64417	10.2135	9.58099	9.26684	7.772	1.484	-1.55	-1.243	-1.927	1.92656e-11	0.0173113	0.0102362	0.225057	0.00018216	1	1	1	1	1	Oo
15247	7.72174	7.42811	7.27128	7.53013	7.44955	-0.2755	-1.1185	0.261	-0.06	0.1665	0.281254	0.529288	0.0887841	0.758669	0.0855397	1	0.5	1	1	1	OoCc
15251	8.80391	8.87034	8.64786	8.84816	8.42337	-0.262	-1.16667	1.158	-0.287	0.0353333	0.374093	0.448399	0.638687	0.328877	0.147201	1	1	1	1	0.666667	OoMur
15254	10.4054	9.32996	9.22318	9.20797	9.39225	-2.305	-1.079	-0.011	0.1475	1.1295	0.000266109	0.563572	0.818521	0.572825	0.534482	1	1	1	1	1	Oo
15258	7.90541	9.57137	9.4858	9.05965	8.80556	3.26467	-1.06167	-1.35667	-1.208	-1.66033	2.28978e-07	0.722301	0.145396	0.447383	0.0114722	1	0.666667	1	1	1	OoMur
15259	6.43987	5.86756	5.55768	2.52041	3.96359	-1.487	-1.24	-8.209	2.719	-3.019	0.375135	0.732277	0.000680719	0.0964274	0.0298979	1	1	1	0	1	OoCcMur
15270	7.74486	9.54115	9.83246	9.27204	9.73067	3.473	1.224	-1.475	1.374	-1.073	2.2849e-11	0.0439242	0.000614416	0.00733354	0.457443	1	1	1	1	1	Oo
15275	6.74698	4.76805	4.77003	3.97037	4.46971	-3.942	1.001	-1.741	1.414	-1.231	9.71995e-07	0.996591	0.0269665	0.195155	0.35959	0	1	0	0	0	OoCc
15278	7.15702	6.37269	6.73426	6.86817	6.72009	-1.722	1.285	1.097	-1.108	-1.01	0.000124529	0.0835054	0.585891	0.561097	0.949889	1	1	1	1	1	Oo
15289	9.53346	9.44034	9.14026	8.94537	9.00823	-0.417	-1.237	-1.14567	0.38	-0.442333	0.215939	0.12857	0.301599	0.35047	0.517932	1	1	1	1	1	Oo
15312	11.3949	11.6284	11.653	11.65	11.801	-0.083	0.351	0.331	0.450333	0.446667	0.305563	0.878452	0.81938	0.309713	0.373182	1	1	1	1	1	Oo
15353	4.23514	5.31485	4.8551	4.17488	5.03538	2.114	-1.375	-1.602	1.816	1.133	0.00169322	0.233333	0.0866198	0.0445317	0.632658	1	0	0	0	0	Oo
15354	9.8349	9.00385	9.30296	9.04442	8.8159	-1.779	1.23	-1.196	-1.172	-1.402	0.000109171	0.172861	0.272335	0.360363	0.0182338	1	1	1	1	1	Oo
15356	7.48453	6.79207	6.83798	6.93865	6.23736	-1.616	1.032	1.072	-1.626	-1.516	2.01173e-05	0.804694	0.583362	0.000612946	0.000303127	0	1	0	0	0	Oo
15357	5.21059	5.91113	6.11033	5.97141	6.13126	1.625	1.148	-1.101	1.117	1.015	0.000400389	0.364106	0.573006	0.527166	0.926414	1	0	1	1	1	OoCcMur
15360	5.81355	5.86782	5.85367	5.97712	5.84326	1.038	-1.01	1.089	-1.097	-1.007	0.825043	0.971957	0.728472	0.716276	0.973066	0	0	0	0	1	OoCc
15364	7.25966	8.81796	7.99579	7.20781	6.57432	3.3595	-1.78875	-1.46425	-1.71575	-3.59575	0.0974525	0.0499643	0.01472	0.277754	0.0408393	0.75	0.75	1	1	1	OoCcMur
15365	8.83954	9.93551	10.4773	9.44913	8.85555	2.138	1.456	-2.039	-1.509	-3.078	0.000484592	0.117266	0.0040002	0.137701	2.57436e-05	1	1	1	1	1	Oo
15366	7.56759	4.79998	5.12722	5.19572	4.94405	-8.76567	0.0876667	0.384333	-0.568333	-0.508	0.000626792	0.465624	0.679306	0.132609	0.0904613	0.333333	1	0.333333	0	0	OoCcMur
15369	8.35968	8.17019	8.39737	8.40842	8.19806	-1.14	1.171	1.008	-1.157	-1.148	0.353921	0.384051	0.974562	0.474288	0.3991	1	1	1	1	1	Oo
15374	8.00158	7.97032	8.284	8.46787	8.34447	0.255	1.25	1.13667	-0.426333	0.377333	0.0309038	0.260249	0.444605	0.570304	0.792364	1	0.666667	1	1	1	OoCc
15377	4.63903	4.96662	5.07568	5.20958	5.54022	1.255	1.079	1.097	1.258	1.38	0.0452456	0.614784	0.558746	0.124947	0.0128015	0	0	0	0	1	Oo
15379	3.95819	7.15246	7.38388	7.47815	7.73478	12.8605	0.2225	0.077	1.207	0.3345	8.39341e-07	0.280706	0.543073	0.585475	0.391616	1	0	0.5	0.5	1	Oo
15381	8.68268	8.48671	8.36308	8.67928	8.81429	-1.147	-0.1115	1.251	0.1155	1.431	0.239865	0.0611429	0.16462	0.207835	0.472396	1	1	1	1	1	Oo
15382	7.38428	8.39885	8.53704	8.91199	8.56623	1.97575	0.6095	0.83375	-1.275	0.50675	0.00154411	0.184973	0.08195	0.201173	0.240765	1	1	1	1	1	Oo
15384	8.77812	8.25338	8.08491	7.72746	7.95163	-1.3164	0.0116	-1.2878	0.791	-0.3098	0.217674	0.292477	0.243459	0.423948	0.238555	1	0.8	1	0.8	0.8	Oo
15387	9.53898	9.23723	9.27759	9.26101	9.43857	-0.7565	-0.45675	-0.0125	1.136	0.622	0.0636303	0.445187	0.489519	0.508001	0.336947	1	0.75	1	1	1	Oo
15442	7.45693	9.51051	9.89218	9.30438	9.37037	4.151	1.303	-1.503	1.047	-1.436	4.94686e-08	0.208266	0.0480515	0.901176	0.0541288	1	0	1	1	1	Oo
15444	4.9814	4.99554	4.61043	5.42754	5.35423	1.01	-1.306	1.762	-1.052	1.675	0.965698	0.321233	0.0363356	0.888271	0.0339277	0	0	0	0	1	Oo
15445	4.57792	4.69793	5.34033	5.68895	5.76349	1.087	1.561	1.273	1.053	1.341	0.614833	0.0268283	0.25516	0.852386	0.10814	1	0	0	1	1	Oo
15452	9.18687	9.43159	9.53903	9.33008	9.247	1.185	1.077	-1.156	-1.059	-1.224	0.0833052	0.567321	0.255593	0.703159	0.0646896	1	1	1	1	1	Oo
15461	6.98602	8.07782	8.36828	8.23942	8.28214	2.143	1.2245	-0.104	1.03	-0.0705	1.81636e-06	0.195888	0.404297	0.881279	0.278859	1	0.5	1	1	1	Oo
15463	7.27022	7.04939	6.8567	6.76339	6.86413	-0.7916	-0.7564	-0.2776	0.2886	0.1984	0.55704	0.557052	0.529601	0.374662	0.334987	1	1	0.8	0.8	0.8	OoCcMur
15464	6.30739	6.01686	5.91513	5.97544	6.21292	-1.223	-1.073	1.043	1.179	1.229	0.129889	0.703439	0.839499	0.37563	0.167861	0	1	1	1	1	OoCc
15467	8.02909	8.18013	8.18112	8.28264	8.48456	0.477667	0.332667	1.07433	0.490667	1.23733	0.356724	0.619087	0.746506	0.510349	0.237049	1	0.666667	1	1	1	Oo
15468	8.68721	9.89678	10.0981	10.0336	9.66343	2.372	1.1505	-1.046	-1.295	-1.3585	0.00156837	0.438792	0.869188	0.180562	0.0657152	1	0.5	1	1	1	Oo
15469	7.01785	6.96207	6.71927	6.47443	6.91524	-1.039	-1.183	-1.185	1.357	1.145	0.836459	0.468773	0.497557	0.20655	0.5183	1	1	1	1	1	Oo
15473	7.70291	6.82564	6.99142	7.58706	7.51641	-1.837	1.122	1.511	-1.05	1.439	6.00948e-05	0.47626	0.00982497	0.808991	0.0116835	1	1	1	1	1	Oo
15481	10.6885	10.7696	10.4902	10.0905	10.3171	-0.241667	-1.215	-1.32767	0.521667	-0.470667	0.282473	0.126646	0.075801	0.123355	0.24074	1	1	1	1	1	Oo
15488	8.9045	7.664	7.99064	8.16608	8.05068	-2.545	1.257	0.14	-0.095	0.057	0.00139537	0.121195	0.483228	0.343033	0.0507729	1	0.5	1	1	1	Oo
15490	8.45328	8.73064	8.72577	8.49863	8.22106	0.593	0.325667	-0.539	-1.22367	-0.873667	0.00271568	0.344787	0.234728	0.481101	0.25845	1	0.333333	0.666667	0.666667	0.666667	OoCcMur
15499	6.26301	7.26659	7.26194	6.96354	7.45372	2.005	-1.003	-1.23	1.405	1.142	0.000151323	0.99034	0.312783	0.103144	0.461393	1	0	0	0	1	Oo
15502	10.1872	10.6199	10.8436	10.6568	10.6841	0.774333	1.16933	-1.14067	0.353	-0.454333	0.0156025	0.318788	0.431704	0.669399	0.468985	1	1	1	1	1	Oo
15505	9.46847	10.579	10.4643	9.86936	9.6661	2.1795	-1.0825	-1.512	-0.168	-1.753	3.78484e-05	0.614913	0.00719973	0.455576	0.00298677	1	1	1	1	1	Oo
15507	7.29443	6.94984	7.78203	7.4941	7.39146	-1.27	1.78	-1.221	-1.074	-1.311	0.0632636	0.000968913	0.228937	0.720261	0.0588334	1	1	1	1	1	Oo
15510	11.0657	10.1943	9.55131	9.25329	9.2473	-1.829	-1.562	-1.229	-1.004	-1.235	5.71804e-06	0.00114283	0.105441	0.98116	0.0621887	1	1	1	1	1	Oo
15511	4.13829	8.29978	8.67866	7.03342	8.09974	20.318	1.308	-3.35133	2.126	-1.53633	2.74411e-11	0.283699	0.000476855	0.00997789	0.261279	1	0.333333	1	1	1	Oo
15516	10.0023	10.1361	9.10166	8.288	8.15906	0.1465	-2.0725	-1.811	-0.1185	-1.9235	0.00116102	0.000126902	0.00790912	0.181242	0.000447803	1	1	1	1	1	Oo
15519	12.0543	12.0765	11.9553	11.9241	11.8552	-0.316333	-1.08867	-0.355667	-0.384	-0.408	0.494049	0.424398	0.746742	0.46961	0.359822	1	1	1	1	1	Oo
15525	9.12782	9.26995	8.63415	8.0899	8.18357	0.114	-1.609	-1.463	0.079	-1.376	0.397532	0.0245936	0.0153998	0.21601	0.146338	1	1	1	1	1	OoCc
15526	10.2269	9.90097	9.85979	9.66258	9.51673	-0.648	-0.363	-1.14733	-0.446667	-1.28233	0.00258246	0.630495	0.287897	0.413539	0.245433	1	1	1	1	1	Oo
15528	9.12159	8.80806	8.63956	8.36361	8.42746	-1.2505	-1.1255	-1.2145	1.0455	-1.1645	0.200497	0.510806	0.308241	0.823425	0.434515	1	1	1	1	1	Oo
15530	8.37916	8.1432	8.05514	8.34351	8.05653	-1.178	-1.063	1.221	-1.22	1.001	0.329931	0.802028	0.375715	0.401562	0.996589	1	1	1	1	1	Oo
15531	7.08221	6.90406	6.42874	6.10865	6.20735	-1.131	-1.39	-1.248	1.071	-1.166	0.203949	0.00807586	0.0721559	0.64345	0.161323	1	1	1	0	1	Oo
15547	6.23225	6.8972	7.0411	7.04423	7.33196	1.586	1.105	1.002	1.221	1.223	0.0016456	0.575507	0.991803	0.273284	0.179205	1	1	1	1	1	OoCc
15551	7.61974	7.87321	7.64106	7.28403	7.62483	1.192	-1.175	-1.281	1.266	-1.011	0.221258	0.380649	0.183269	0.224993	0.952711	1	1	1	1	1	Oo
15560	4.62031	4.21079	3.64457	3.95482	3.87634	-1.328	-1.481	1.24	-1.056	1.174	0.153734	0.105165	0.431203	0.871187	0.490306	0	0	0	0	1	OoCc
15563	6.55256	6.84237	7.0148	7.57158	7.2577	1.222	1.127	1.471	-1.243	1.183	0.228404	0.623936	0.0657546	0.408076	0.400554	0	0	0	1	1	Oo
15566	7.37461	7.21943	7.66979	7.958	8.07571	-1.114	1.366	1.221	1.085	1.325	0.31354	0.0199316	0.142883	0.663316	0.0227281	0	0	0	0	1	Oo
15567	1.86823	7.03938	6.68679	6.45145	6.34467	36.031	-1.277	-1.177	-1.077	-1.268	8.56418e-14	0.212334	0.458955	0.770666	0.187097	1	0	1	0	1	Oo
15568	6.52942	5.97274	5.8205	5.66058	5.85618	-1.47733	-0.463667	-1.119	1.15233	-0.301667	0.0427374	0.60406	0.704994	0.617079	0.566674	0.666667	1	0.333333	0.333333	0.666667	Oo
15569	10.2733	9.62627	9.27843	9.26601	9.33138	-1.641	-1.283	-0.009	-0.4395	0.05425	0.0381212	0.296519	0.838285	0.620066	0.425283	0.75	1	0.75	0.75	1	Oo
15571	3.49192	7.14929	6.47571	6.39066	6.41481	13.1055	-1.602	-1.0605	0.019	-0.0485	3.26664e-11	0.0117386	0.782904	0.508788	0.405799	1	0	0.5	1	1	Oo
15574	6.15813	7.53813	7.4794	7.49623	7.93953	2.784	-0.045	0.014	1.361	1.3905	0.000173308	0.498345	0.212247	0.0542691	0.143795	0.5	0.5	0.5	0.5	1	Oo
15587	6.15685	7.53955	8.27164	7.76445	7.45455	2.608	1.661	-1.421	-1.24	-1.762	3.76423e-08	0.000693174	0.0111283	0.136687	9.84669e-05	0	0	1	0	1	Oo
15893	4.07779	7.12635	7.48743	7.36227	7.31717	14.277	1.2875	-1.094	-1.0315	-1.13	5.96575e-07	0.1517	0.644211	0.887686	0.51166	1	0	1	0.5	1	Oo
15900	5.10974	5.60258	6.01508	6.29846	6.58137	1.407	1.331	1.217	1.217	1.481	0.0613967	0.19721	0.428116	0.447061	0.0541452	1	0	1	1	1	Oo
15901	8.57684	5.28317	5.14439	5.31061	5.4238	-9.806	-1.101	1.122	1.082	1.214	8.2802e-12	0.607163	0.560977	0.717835	0.216996	0	1	0	0	0	OoCcMur
15902	8.08969	4.38809	2.53009	2.21707	3.33801	-13.01	-3.625	-1.242	2.175	1.751	7.82645e-06	0.0183245	0.74471	0.188898	0.259658	0	1	0	0	0	OoCc
15903	8.1202	8.33631	7.93032	6.46434	5.51732	1.162	-1.325	-2.762	-1.928	-5.326	0.309623	0.117837	1.52828e-05	0.00326146	1.14194e-08	1	0	1	1	1	Oo
15904	5.7117	4.67009	4.08658	3.9053	3.75949	-2.059	-1.498	-1.134	-1.106	-1.254	0.0052109	0.172498	0.731198	0.798796	0.419018	0	1	0	0	0	OoCcMur
15925	7.49494	7.68722	7.34702	7.43926	7.38204	0.498667	-1.277	0.403667	-0.376	-0.298667	0.12794	0.31301	0.434501	0.490958	0.329791	0.666667	0.666667	0.666667	0.666667	1	OoMur
15926	6.30979	6.47994	6.64902	6.28225	5.86846	0.1855	1.125	-1.298	-1.3575	-1.7235	0.0827166	0.720761	0.459388	0.466221	0.052594	1	0.5	1	0.5	0.5	OoCc
15929	10.0425	8.75985	8.35326	8.18977	8.15187	-2.456	-1.3255	-1.121	-1.0265	-1.1515	1.58136e-05	0.0749808	0.525975	0.889096	0.323565	1	1	1	1	1	Oo
15931	9.1099	7.10315	6.01059	6.26456	5.60377	-4.63	-2.548	0.3585	-1.6875	-0.4015	4.95075e-05	0.187542	0.0470342	0.395608	0.457921	0.5	1	0.5	0.5	0.5	OoCc
15932	7.30905	7.70408	7.77844	7.92966	7.99511	0.394	1.053	0.1285	0.0495	1.1695	0.292027	0.819773	0.39217	0.724483	0.475482	1	1	1	1	1	Oo
15936	8.00921	6.56633	6.15932	5.22894	4.54487	-2.719	-1.326	-1.906	-1.607	-3.062	6.3714e-05	0.268946	0.0140174	0.086563	6.76069e-05	1	0	1	0	0	Oo
15937	4.93381	3.89158	2.99351	4.16235	4.6469	-2.059	-1.864	2.248	1.399	3.146	0.160805	0.340388	0.227621	0.670828	0.0492734	0	1	0	0	0	Oo
15975	6.43627	6.31022	6.31163	6.22579	5.70604	-0.105	0.001	-1.061	-1.479	-1.5705	0.248504	0.378946	0.761779	0.212286	0.0476174	0.5	1	0.5	0.5	0.5	Oo
15982	8.03149	8.03864	8.55029	9.04775	9.27862	1.005	1.426	1.412	1.174	1.657	0.962147	0.00522251	0.0067204	0.227044	0.000120354	1	1	1	1	1	Oo
16000	5.5802	4.99829	4.63121	5.00565	4.07953	-1.497	-1.29	1.296	-1.9	-1.466	0.286947	0.619459	0.64057	0.211858	0.382013	0	1	0	0	0	OoCcMur
16001	10.1668	8.44865	8.40781	7.89585	7.9128	-3.2915	-0.035	-1.4285	0.012	-1.4135	2.25763e-05	0.33749	0.183776	0.975138	0.175142	1	1	0.5	0	0	Oo
16004	7.74918	7.76646	7.62412	7.55813	7.35229	0.017	-0.1115	-0.0495	-0.183	-1.2255	0.0124701	0.551587	0.716149	0.320405	0.471135	1	1	1	1	1	Oo
16011	6.96517	6.14104	6.27799	6.354	6.91844	-1.77	1.1	1.054	1.479	1.559	0.00307017	0.702799	0.84931	0.103144	0.0289819	1	0	1	0	1	OoCc
16012	6.51449	6.20964	5.85758	6.07999	5.80834	-1.235	-1.276	1.167	-1.207	-1.035	0.0716328	0.0849946	0.316751	0.231641	0.816838	1	1	1	1	1	Oo
16017	5.71592	7.05665	8.2123	8.59988	8.55301	2.533	2.228	1.308	-1.033	1.266	9.14397e-09	1.44933e-06	0.0242315	0.837745	0.0275802	1	0	1	1	1	Oo
16019	4.97499	6.87096	7.89586	8.30377	8.35739	5.60667	2.09683	1.33783	0.046	1.10333	1.61859e-05	0.0107573	0.265728	0.47753	0.328898	0.333333	0	1	1	1	Oo
16061	6.37392	6.3987	6.38562	6.36537	6.23652	1.017	-1.009	-1.014	-1.093	-1.109	0.897562	0.964914	0.948123	0.63521	0.477496	1	0	1	1	0	Oo
16147	5.02607	5.23209	5.52111	5.42853	5.66964	1.154	1.222	-1.066	1.182	1.108	0.273548	0.213323	0.747199	0.358629	0.501355	0	0	0	0	1	Oo
16150	9.65153	10.1374	9.89763	8.62065	8.63321	1.4	-1.181	-2.423	1.009	-2.402	0.00038306	0.0980926	9.40083e-08	0.949995	2.46496e-08	1	1	1	1	1	OoMur
16151	8.28004	7.15116	7.46701	6.20674	5.58915	-2.2875	0.78475	-2.4655	-1.62675	-4.10025	0.0029437	0.336096	0.000570605	0.257266	8.99707e-05	0.25	1	0.75	0.25	0	Oo
16153	4.74762	4.77957	4.66975	4.54978	4.67302	1.022	-1.079	-1.087	1.089	1.002	0.937678	0.846468	0.840723	0.851425	0.995053	0	0	0	0	1	Oo
16155	3.54853	6.00125	7.10393	6.99419	7.52592	5.474	2.148	-1.079	1.446	1.34	6.48534e-10	0.000198959	0.721136	0.0564771	0.0669049	0	0	1	1	1	OoMur
16164	5.31536	3.42538	1.95192	2.13499	2.53662	-3.706	-2.777	1.135	1.321	1.5	0.0323785	0.162129	0.895213	0.77035	0.568481	0	1	0	0	0	Oo
16173	6.73505	5.04578	4.70954	4.75109	5.67117	-3.225	-1.262	1.029	1.892	1.948	9.6589e-09	0.107344	0.879066	0.00077033	5.05077e-05	1	1	0	0	1	OoCc
16177	5.70555	7.89121	8.5192	8.38919	7.6802	4.549	1.545	-1.094	-1.635	-1.789	1.13995e-08	0.0242522	0.698646	0.0237264	0.00219508	1	0	1	1	1	Oo
16178	6.12039	6.54073	7.01775	7.26927	7.47762	1.338	1.392	1.19	1.155	1.375	0.0903876	0.112808	0.461529	0.57131	0.097805	0	0	1	1	1	Oo
16180	4.72678	6.36841	7.67493	7.93873	7.80611	3.12	2.473	1.201	-1.096	1.095	7.12421e-09	2.78001e-06	0.213538	0.585911	0.491747	1	0	1	1	1	OoMur
16195	8.33719	8.23595	8.22549	8.72203	8.74606	-0.155	-0.008	1.4155	0.018	1.4525	1.15672e-05	0.782684	0.060434	0.736437	0.085889	1	1	1	1	1	Oo
16196	2.88175	5.90971	6.86907	6.81388	7.27885	8.6205	1.9965	-0.0405	1.381	1.329	9.17406e-07	0.176946	0.906919	0.321753	0.309029	0.5	0	1	1	1	Oo
16197	5.34282	5.21622	4.89658	4.96779	5.07009	-1.092	-1.248	1.051	1.073	1.128	0.626706	0.318902	0.857775	0.806553	0.566516	0	0	1	0	0	Oo
16201	7.86973	7.82313	7.71327	7.86402	8.0401	-0.036	-1.0795	1.1125	0.15	1.2655	0.342878	0.603831	0.517338	0.3276	0.222	1	1	1	1	1	Oo
16202	8.29687	6.62665	6.8045	6.35535	6.51384	-3.183	1.131	-1.365	1.116	-1.223	1.4042e-07	0.513115	0.0881661	0.610633	0.21427	0	1	1	0	0	Oo
16206	6.92533	7.98833	7.8439	7.8239	8.18737	1.746	-1.106	-0.348	1.299	1.293	0.254528	0.509827	0.784982	0.275896	0.327853	1	1	1	1	1	OoCc
16210	7.44054	7.32335	5.88645	5.97003	5.11073	-1.085	-2.707	1.06	-1.814	-1.712	0.449065	5.1019e-07	0.717712	0.000548996	0.000150769	1	1	1	1	0	Oo
16211	8.51922	8.11208	7.77852	7.96865	8.52142	-0.347667	-0.656667	0.480333	1.475	1.71033	0.217248	0.591922	0.513062	0.111797	0.0658084	1	1	1	1	1	Oo
16319	9.45905	9.96914	9.71877	9.65899	9.82859	1.4275	-1.19	-1.0435	1.1255	1.079	0.0050255	0.228674	0.773011	0.471779	0.579776	1	0.5	1	1	1	Oo
16324	4.32133	4.58092	4.64589	5.2322	5.23009	1.197	1.046	1.501	-1.001	1.499	0.234344	0.841221	0.0342377	0.994785	0.0200104	0	0	0	1	1	OoCc
16330	7.02385	8.52927	8.68065	8.47763	8.51766	2.839	1.111	-1.151	1.028	-1.12	2.20238e-09	0.38906	0.25867	0.864987	0.297438	1	1	1	1	1	OoCc
16331	6.57135	7.16716	6.94242	6.66658	6.88218	1.511	-1.169	-1.211	1.161	-1.043	0.0184726	0.479052	0.406359	0.551762	0.84739	1	0	1	0	1	Oo
16332	7.84933	7.13085	6.59961	6.36627	6.52265	-1.645	-1.445	-1.176	1.114	-1.055	0.00133338	0.0331508	0.394158	0.607243	0.758827	1	1	0	0	1	Oo
16337	8.85147	7.56689	6.97774	7.09324	7.5859	-2.436	-1.504	1.083	1.407	1.524	4.28493e-06	0.02421	0.722863	0.102031	0.0127711	0	1	0	0	0	Oo
16341	10.752	10.0862	10.0837	10.2965	10.1828	-1.62833	-0.335	1.168	-0.421333	1.07133	0.025229	0.841538	0.473841	0.699666	0.620787	1	1	1	1	1	Oo
16351	7.92539	7.81056	7.81439	7.97149	8.2975	-1.083	1.003	1.115	1.254	1.398	0.381289	0.985199	0.371234	0.0665524	0.00240615	1	1	1	1	1	Oo
16362	8.58688	9.80087	9.84466	9.63413	10.014	2.32	1.031	-1.157	1.301	1.125	8.08438e-08	0.837959	0.267836	0.0543887	0.304446	1	1	1	1	1	Oo
16367	5.37632	5.27847	5.56592	5.09296	5.82267	-1.07	1.22	-1.388	1.658	1.195	0.756031	0.46856	0.234666	0.0774151	0.471313	0	0	0	0	1	Oo
16399	6.55505	6.42144	6.37785	6.40944	6.53282	-1.097	-1.031	1.022	1.089	1.113	0.414034	0.856822	0.904856	0.613188	0.410726	1	0	1	0	1	OoMur
16400	5.9514	5.83535	5.95399	6.2505	6.07144	-1.084	1.086	1.228	-1.132	1.085	0.395434	0.505407	0.0863194	0.343905	0.459076	1	1	1	1	1	Oo
16403	7.58197	9.39471	9.07084	9.45016	9.88017	3.52	-0.294	1.32	1.361	1.8395	2.29801e-07	0.39284	0.247923	0.123707	0.00851313	1	1	1	1	1	OoCc
16407	4.59973	7.09693	7.48571	7.29463	7.06772	5.646	1.309	-1.142	-1.17	-1.336	1.04186e-05	0.528514	0.787368	0.782005	0.430831	0	0	1	0	0	Oo
16410	8.22546	6.41714	6.0193	5.49674	5.78628	-3.502	-1.318	-1.437	1.222	-1.175	7.6743e-10	0.0345881	0.00823976	0.158237	0.176426	1	1	0	0	0	OoMur
16412	8.34775	6.34244	6.43456	6.13041	6.69015	-4.015	1.066	-1.235	1.474	1.194	4.39696e-05	0.877687	0.594764	0.30786	0.591078	0	1	0	0	0	OoCc
16413	7.26068	7.8064	8.11997	8.23706	8.51234	1.46	1.243	1.085	1.21	1.313	0.00617452	0.172109	0.67383	0.284456	0.0630522	1	1	1	1	1	Oo
16415	5.38339	5.37091	5.68405	4.97127	5.1807	-1.009	1.242	-1.639	1.156	-1.418	0.946956	0.141764	0.002295	0.395056	0.0130356	1	1	0	0	0	Oo
16416	7.78079	9.42491	9.44265	9.3484	9.45247	3.126	1.012	-1.068	1.075	1.007	2.65044e-05	0.975164	0.859894	0.873725	0.983908	1	0	1	1	1	OoMur
16418	10.1714	10.2778	10.6726	10.9198	11.0991	1.077	1.315	1.187	1.132	1.344	0.349949	0.00696888	0.0869682	0.245984	0.00212981	1	1	1	1	1	Oo
16423	6.03915	5.99832	5.9632	5.95932	5.96455	-0.0395	-1.0245	-0.003	0.004	0.001	0.0105958	0.90048	0.545396	0.654312	0.920102	0.5	0.5	0.5	0.5	1	Oo
16430	8.9036	9.1554	8.7112	8.4657	8.59266	0.269	-1.3615	-1.1925	1.096	-0.0995	0.0276342	0.0333702	0.391243	0.664801	0.248573	1	1	1	1	1	Oo
16431	6.83994	4.26134	3.18741	3.69134	3.13748	-5.974	-2.105	1.418	-1.468	-1.035	1.371e-05	0.056836	0.425963	0.393774	0.933193	0	1	0	0	0	OoCc
16432	10.5556	9.56598	9.3606	9.16517	9.12464	-2.005	-1.1535	-1.148	-0.0305	-1.1775	4.6648e-06	0.285662	0.398815	0.610924	0.16045	1	1	1	1	1	Oo
16438	9.52958	8.29354	7.82562	8.06205	8.37156	-2.3955	-1.3935	1.183	1.254	1.5045	4.38168e-08	0.00861996	0.251806	0.273783	0.0313573	1	1	1	1	1	Oo
16439	5.85703	7.06964	7.15469	7.14722	7.25971	2.5355	0.101	0.472	0.58875	0.585	0.0290934	0.215875	0.336693	0.450509	0.309388	0.75	0	0.75	1	0.75	OoCcMur
16443	7.35064	7.58358	7.63826	7.77896	7.84349	1.17575	0.53925	0.60675	0.54975	0.6755	0.321675	0.663532	0.655507	0.631707	0.284901	1	0.75	1	1	1	Oo
16449	9.19089	10.477	10.2573	10.2605	10.2752	2.64	-1.165	0.0025	0.0105	0.015	8.07832e-05	0.29144	0.466688	0.722419	0.159608	1	1	1	1	1	OoMur
16450	8.31839	9.24262	8.71015	8.38447	8.38723	1.961	-1.5015	-1.255	0.0025	-1.264	0.0127999	0.342578	0.295122	0.352346	0.351467	1	1	1	1	1	Oo
16451	7.78362	7.76096	7.69487	7.36321	7.31459	0.287333	-0.382333	-1.267	-0.376	-0.688333	0.0419763	0.21777	0.261102	0.284913	0.0401119	1	1	1	1	1	Oo
16452	8.78571	9.09396	9.25192	9.61439	9.59818	1.2435	1.1175	1.289	-1.0115	1.275	0.133456	0.470675	0.10768	0.950844	0.0909013	1	1	1	1	1	Oo
16468	7.9264	8.09665	7.9811	8.35129	8.32134	0.00233333	0.211667	1.299	-0.354333	1.27533	0.1443	0.286759	0.19075	0.887063	0.193557	0.666667	0.666667	0.666667	0.666667	1	OoCc
16478	8.23233	8.11999	7.8732	7.21543	7.30193	-1.081	-1.187	-1.578	1.062	-1.486	0.545746	0.281785	0.00599015	0.7681	0.00807731	1	1	1	1	1	Oo
16483	7.00716	6.40428	6.48189	6.86789	6.89149	-1.519	1.055	1.307	1.016	1.328	0.0206488	0.834932	0.239855	0.956069	0.14885	0	1	0	0	1	OoMur
16494	5.56789	5.26101	5.49477	5.31255	5.50008	-1.237	1.176	-1.135	1.139	1.004	0.22861	0.481257	0.623154	0.626161	0.987654	1	1	0	1	1	Oo
16497	5.92089	6.2175	6.35484	6.24936	5.97742	1.228	1.1	-1.076	-1.207	-1.299	0.282115	0.72368	0.80438	0.497032	0.22669	1	0	1	1	1	Oo
16504	8.71401	8.17795	8.12902	8.21422	8.49624	-1.45	-1.035	1.061	1.216	1.29	0.00528267	0.871993	0.768841	0.308994	0.0748602	1	0	1	1	1	Oo
16510	8.18548	9.23312	9.26425	9.61213	9.78278	2.1255	0.023	1.2945	0.147	1.433	0.000176419	0.710671	0.370216	0.314882	0.00964147	1	1	1	1	1	Oo
16511	5.76947	6.35765	6.35729	6.02974	6.34456	1.503	1	-1.255	1.244	-1.009	0.00465207	0.99861	0.192981	0.231265	0.960871	1	0	1	1	1	OoCc
16512	9.68804	9.84098	10.2074	9.91691	9.92705	1.114	1.29	-1.2245	0.0075	-1.2145	0.363653	0.0323002	0.10693	0.762427	0.0559503	1	0	1	1	1	Oo
16519	6.36269	6.27483	6.35032	6.68126	6.20035	-1.063	1.054	1.258	-1.396	-1.11	0.75099	0.849632	0.357942	0.184328	0.643099	1	1	1	1	1	OoCc
16522	5.78508	5.65456	5.84659	5.69504	5.70407	-1.095	1.142	-1.111	1.006	-1.104	0.638855	0.600202	0.710546	0.984833	0.66623	0	0	0	1	1	Oo
16525	5.96283	6.30388	5.90785	5.43871	5.23344	1.2995	-1.3175	-1.411	-0.173	-1.596	0.48046	0.200688	0.329816	0.513277	0.020616	1	0	0.5	0	0	Oo
16531	8.07374	7.3253	6.82843	5.0857	3.79489	-1.68	-1.411	-3.347	-2.447	-8.188	0.230165	0.578243	0.0257394	0.153779	0.000193956	1	1	0	0	0	Oo
16535	4.97839	7.43211	6.94119	6.57278	6.92132	5.478	-1.405	-1.291	1.273	-1.014	2.17996e-08	0.128235	0.289882	0.343166	0.954465	1	0	1	1	1	Oo
16536	5.88415	5.99975	5.89249	6.2026	6.57015	1.083	-1.077	1.24	1.29	1.6	0.494862	0.637834	0.150179	0.103395	0.00115275	0	1	0	1	1	Oo
16549	8.86999	8.93462	8.63538	8.63557	9.28433	0.385	-0.591	-0.332667	1.63467	1.64367	0.317564	0.354319	0.749401	0.34282	0.323914	1	0.333333	0.666667	0.666667	1	Oo
16551	6.79081	7.12111	6.91314	6.55893	6.53596	0.705667	-0.500667	-0.693333	-0.352333	-0.154	0.00427505	0.519061	0.618894	0.416472	0.365052	1	1	0.666667	0.666667	0.666667	OoCc
16553	8.32618	7.62144	7.61243	7.75036	7.66286	-1.064	0.324333	0.441667	-0.4	0.370333	0.289513	0.68007	0.610072	0.524686	0.342875	0.666667	1	0.666667	0.666667	0.666667	Oo
16554	9.85729	9.96043	9.61828	9.17119	9.27873	1.074	-1.268	-1.363	1.077	-1.265	0.309935	0.00871011	0.00107088	0.51693	0.0050421	1	1	1	1	1	Oo
16558	8.56306	7.17237	6.85634	6.19081	6.11141	-2.6685	-1.255	-1.6005	-0.0615	-1.6765	1.21053e-05	0.324625	0.0387249	0.579064	0.00233874	1	1	1	1	0.5	Oo
16559	6.99909	10.6087	10.6941	10.4489	10.3209	13.254	0.065	-1.1855	-1.093	-1.2955	5.16742e-13	0.548564	0.265297	0.612006	0.0493153	1	1	1	1	1	Oo
16561	6.37438	6.06622	6.1127	6.26937	6.1544	-0.446833	0.0741667	0.475	-0.757167	0.0261667	0.0105937	0.23556	0.237032	0.508855	0.480045	0.666667	0.666667	0.666667	0.5	0.666667	OoCc
16562	5.67282	4.87866	5.14919	5.43016	5.86828	-1.734	1.206	1.215	1.355	1.646	0.000223202	0.232927	0.240856	0.0782849	0.00151004	0	0	0	0	1	Oo
16563	9.41771	8.78029	8.31431	8.33354	8.3567	-1.5755	-1.381	0.0155	0.017	0.031	0.0149979	0.0392063	0.492165	0.739994	0.722506	1	1	1	1	1	OoMur
16564	7.7345	5.679	4.29183	3.86399	4.74352	-4.319	-2.773	-0.617	1.952	0.461	0.000628837	0.0421295	0.141152	0.290378	0.468858	0	1	0	0	0	Oo
16565	9.20614	8.79081	8.77807	8.91128	9.01093	-1.334	-1.009	1.097	1.072	1.175	0.0135142	0.962928	0.569674	0.736263	0.212512	1	1	1	1	1	Oo
16568	9.42224	8.78145	8.38944	8.11844	7.70916	-1.57125	-1.32225	-0.24325	-1.3555	-1.733	0.00337938	0.199171	0.325321	0.232725	0.152165	0.75	1	0.5	0.5	0.5	Oo
16569	5.67205	5.86153	6.08131	6.10038	6.14513	1.146	1.168	1.013	0.0325	0.0465	0.462284	0.434314	0.955933	0.856263	0.805952	1	0.5	1	0.5	0.5	Oo
16571	9.57434	10.5213	9.63305	9.43069	9.48072	1.928	-1.851	-1.151	1.035	-1.111	6.02729e-06	0.00013052	0.33725	0.853386	0.404153	1	1	1	1	1	Oo
16573	6.07877	5.3111	4.66367	5.15914	5.15741	-1.8516	-1.6938	1.5252	0.1936	1.1494	0.174442	0.226698	0.452531	0.60733	0.442091	0.6	1	0.4	0.4	0.6	OoCc
16574	6.69297	6.2125	7.34806	8.58432	8.46782	-1.4065	2.2045	2.404	-0.09	2.276	0.117957	0.000218197	0.00208936	0.689742	0.00934633	0.5	0.5	1	1	1	Oo
16578	7.84715	6.28175	6.41163	6.54558	6.28658	-2.96	1.094	1.097	-1.197	-1.091	1.06592e-07	0.612685	0.629126	0.326241	0.581386	0	1	0	0	1	Oo
16579	8.71017	7.041	5.8444	5.07358	4.78618	-3.1955	-2.3845	-1.714	-1.2335	-2.085	2.54537e-09	0.000442923	0.00246731	0.379284	5.21551e-06	1	1	1	0.5	0.5	Oo
16582	6.76933	7.60399	8.0949	7.91696	8.1757	1.783	1.405	-1.131	1.196	1.058	0.000120037	0.0290783	0.480662	0.302164	0.717127	1	0	1	1	1	Oo
16588	5.69403	6.12551	6.18787	5.65457	5.96506	1.349	1.044	-1.447	1.24	-1.167	0.0411838	0.838926	0.0420528	0.273996	0.349083	1	0	0	1	0	Oo
16589	6.57395	7.8631	7.49776	7.80176	8.003	2.444	-1.288	1.235	1.15	1.419	3.12189e-06	0.141764	0.254412	0.495661	0.0296295	1	1	1	1	1	Oo
16590	9.2256	8.76186	8.18683	8.07682	7.88612	-0.506	-1.4955	-0.093	-0.217	-0.282	0.198012	0.0347355	0.318853	0.0256737	0.293599	1	1	1	1	1	Oo
16592	5.88035	7.993	8.60935	8.67839	9.08725	4.325	1.533	1.049	1.328	1.393	1.81147e-10	0.00351068	0.778437	0.0617656	0.0108404	1	0	1	1	1	Oo
16593	5.73266	6.35275	6.59977	6.7454	7.02563	1.613	1.187	0.133	1.2355	1.3485	0.186292	0.380791	0.207006	0.507724	0.110518	0.5	0.5	0.5	1	1	Oo
16597	5.93279	5.78795	5.48023	5.56836	5.44638	-1.106	-1.238	1.063	-1.088	-1.024	0.686464	0.528145	0.881657	0.865264	0.945055	0	1	0	0	0	Oo
16599	8.14576	8.3449	8.02123	8.36462	7.69183	1.148	-1.252	1.269	-1.594	-1.256	0.368542	0.235721	0.233789	0.0283183	0.187089	1	1	1	1	1	OoCc
16600	5.73094	5.71329	5.45211	5.62024	5.72919	-1.012	-1.198	1.124	1.078	1.212	0.953551	0.480973	0.692093	0.816035	0.400297	1	1	1	1	1	Oo
16601	3.86966	5.42203	5.4624	5.14048	5.43335	3.381	0.0325	-1.273	1.225	-0.0245	0.00153375	0.633512	0.606197	0.517436	0.436142	0.5	0	0.5	0	1	OoMur
16617	5.48551	5.30007	5.60458	5.53062	5.10517	-1.137	1.235	-1.053	-1.343	-1.414	0.368856	0.231164	0.81651	0.123547	0.0331964	0	1	1	0	1	Oo
16646	6.04101	4.91148	4.69079	4.5918	4.19775	-2.553	-0.6765	-0.577	-0.999	-0.99825	0.0840372	0.545703	0.472145	0.354674	0.449836	0.25	1	0.25	0	0	OoMur
16647	11.5472	11.6051	11.624	11.6703	11.9077	1.041	1.013	1.033	1.179	1.217	0.525752	0.890824	0.733927	0.0540646	0.00743651	1	1	1	1	1	Oo
16648	6.83645	7.55359	7.72866	7.94739	8.27871	1.341	1.13133	1.16933	1.265	1.47933	0.0332755	0.341285	0.359513	0.172309	0.00182014	1	1	1	1	1	Oo
16649	7.94812	6.09658	5.34356	3.36999	2.40968	-3.609	-1.685	-3.927	-1.946	-7.642	3.80231e-06	0.0398674	2.20739e-05	0.021114	6.43551e-08	1	1	1	0	0	Oo
16650	6.97348	6.49463	6.3403	6.32398	6.67916	-1.4025	-0.1355	-0.0145	0.3345	1.2665	0.121984	0.407539	0.358494	0.459875	0.318915	1	1	1	1	1	OoMur
16651	5.30536	6.02089	6.74747	7.48752	7.79614	1.642	1.655	1.67	1.239	2.069	1.46561e-05	0.00012565	0.000101541	0.076501	6.70769e-07	1	0	1	1	1	OoCc
16653	8.53382	8.9386	8.91367	8.83905	8.7493	1.3395	-1.0175	-0.062	-0.068	-0.1505	0.108485	0.90824	0.130675	0.55765	0.035608	1	1	1	1	1	Oo
16656	7.86813	7.42699	7.4435	7.16834	6.99642	-0.546	0.012	-0.278	-0.1545	-0.5895	0.139401	0.876322	0.180605	0.407334	0.0171495	1	0	0.5	0.5	0.5	Oo
16660	5.4026	5.03969	4.12655	4.37782	4.35017	-1.286	-1.883	1.19	-1.019	1.168	0.53315	0.196271	0.774352	0.978	0.754111	0	1	0	0	0	Oo
16661	6.44534	7.23137	7.19226	7.4663	7.29253	1.724	-1.027	1.209	-1.128	1.072	2.3807e-06	0.826787	0.0760083	0.300904	0.480837	1	1	1	1	1	Oo
16664	4.96788	5.42945	5.19275	5.36489	5.26563	1.377	-1.178	1.127	-1.071	1.052	0.0145084	0.296778	0.497437	0.726796	0.745513	0	0	0	0	1	Oo
16670	7.18912	6.98181	6.61086	6.67245	6.7616	-1.155	-1.293	1.044	1.064	1.11	0.166884	0.0442195	0.788244	0.701692	0.383379	1	1	1	1	1	OoMur
16672	5.7486	1.90286	1.98726	2.98006	2.29284	-14.378	1.06	1.99	-1.61	1.236	7.93129e-06	0.935699	0.246984	0.467094	0.703021	0	1	0	0	0	Oo
16680	5.61647	7.33273	7.57974	7.60795	7.56077	3.286	1.187	1.02	-1.033	-1.013	1.0616e-08	0.256076	0.92215	0.872759	0.933193	0	0	1	0	1	Oo
16687	5.63608	5.69517	5.75963	5.89808	6.06668	1.042	1.046	1.101	1.124	1.237	0.794397	0.842766	0.669597	0.608021	0.214317	0	1	0	0	1	Oo
16691	6.24573	6.88565	7.54836	5.98604	5.9263	1.558	1.583	-2.953	-1.042	-3.078	0.00281132	0.00853988	3.70754e-06	0.858971	6.1096e-07	1	0	1	0	0	OoMur
16709	9.28602	9.56062	9.48472	9.42328	9.75269	1.21	-1.054	-1.044	1.257	1.204	0.0635872	0.710755	0.783079	0.09487	0.103673	1	1	1	1	1	Oo
16728	6.81853	6.41845	6.28522	6.574	6.66771	-1.32	-1.097	1.222	1.067	1.304	0.0224125	0.556058	0.189336	0.724448	0.0465831	1	1	0	1	1	Oo
16765	8.49752	7.76927	7.3192	6.99532	7.23938	-1.6575	-1.3675	-0.285	0.221	-1.0575	0.0509218	0.266623	0.63006	0.333026	0.604167	0.5	1	0.5	0.5	0.5	Oo
16773	8.31758	9.2921	8.37457	7.84946	8.26233	1.965	-1.889	-1.439	1.331	-1.081	0.000245076	0.00244504	0.0691235	0.178821	0.685267	1	1	1	1	1	Oo
16777	6.28659	8.45291	8.56856	8.52906	8.74196	4.70267	1.08533	-0.362	1.16167	1.136	4.12062e-07	0.719455	0.791125	0.483038	0.56602	0.666667	0.666667	1	1	1	OoCc
16782	6.53021	6.02996	5.93459	5.56128	6.14579	-1.414	-1.068	-1.295	1.5	1.158	0.0613827	0.803531	0.283052	0.100694	0.494909	0	1	0	0	0	Oo
16783	11.8294	11.8739	11.2396	11.2137	11.1506	1.031	-1.552	-1.018	-1.045	-1.064	0.674694	5.63383e-05	0.87488	0.693394	0.460822	1	1	1	1	1	Oo
16784	7.30208	6.48273	5.41907	5.29017	4.72631	-1.97075	-2.1165	-0.60875	-1.52725	-1.6435	0.29763	0.0358379	0.689659	0.508043	0.438693	1	0.75	0.5	0.5	0.5	Oo
16785	11.5706	9.93553	9.87575	9.91226	9.67986	-3.106	-1.042	1.026	-1.175	-1.145	2.38426e-08	0.817796	0.897871	0.345603	0.336483	1	1	1	1	1	Oo
16792	3.96075	4.84187	5.17081	5.64724	5.57925	1.86	0.2945	0.516	-0.0685	1.329	0.00936684	0.51995	0.369709	0.182521	0.239367	0	0	0	0.5	1	Oo
16795	8.08236	8.08056	7.42616	7.17022	6.93293	-1.001	-1.574	-1.194	-1.179	-1.408	0.988619	0.000189014	0.0949573	0.142753	0.00105812	1	1	1	1	1	Oo
16796	7.13822	5.64698	5.38974	4.88249	5.89774	-3.658	-0.8118	-0.7732	1.8406	1.4606	0.0388864	0.582383	0.367622	0.198781	0.360033	0.8	1	0.4	0.2	0.8	Oo
16798	6.98095	6.56485	6.66959	6.36769	6.78197	-1.3355	1.0755	-0.4015	1.338	0.136	0.0411877	0.716619	0.0129027	0.197739	0.00131289	0.5	1	0.5	0.5	0.5	Oo
16801	5.84256	6.86503	7.30466	6.95147	7.28585	2.031	1.356	-1.277	1.261	-1.013	0.00019046	0.121216	0.245104	0.297698	0.951313	0	0	0	0	1	OoMur
16803	5.45914	5.17852	6.56024	7.11166	7.04538	-1.215	2.606	1.466	-1.047	1.4	0.548864	0.0170064	0.375013	0.933028	0.361881	0	0	0	0	1	Oo
16814	5.46311	6.43268	6.7298	7.61484	7.71367	1.958	1.229	1.847	1.071	1.978	1.0974e-05	0.152117	0.000270174	0.708471	3.62411e-05	1	0	1	1	1	Oo
16815	5.80972	6.38027	6.1424	6.60687	6.81769	1.485	-1.179	1.38	1.157	1.597	0.00178606	0.247769	0.0274469	0.362704	0.00110622	0	0	0	0	1	Oo
16816	5.17033	4.90411	5.4301	5.39701	5.28343	-1.203	1.44	-1.023	-1.082	-1.107	0.363587	0.140527	0.948123	0.813118	0.680056	0	0	0	0	1	Oo
16818	4.93517	5.14272	5.52293	5.47749	5.24105	1.155	1.302	-1.032	-1.178	-1.216	0.252811	0.086195	0.875442	0.349077	0.169434	1	0	1	1	1	OoCc
16825	4.29408	5.45219	5.58682	5.78422	6.6366	2.232	1.098	1.147	1.805	2.07	0.000497561	0.742882	0.644658	0.0341688	0.00290585	1	0	0	0	1	Oo
16826	2.67756	3.94592	4.26646	5.67911	6.11326	2.409	1.249	2.662	1.351	3.597	0.159717	0.824601	0.230561	0.800989	0.0725853	0	0	0	0	1	Oo
16828	5.95613	2.19114	3.04996	4.87784	5.9939	-13.595	1.814	3.55	2.168	7.695	8.13576e-10	0.0297329	0.000107863	0.0139848	1.55979e-07	0	1	0	0	0	Oo
16832	12.4663	13.2053	12.9757	12.9446	12.7377	1.70425	-1.175	-0.5225	-1.16025	-1.18225	0.0115481	0.202217	0.82008	0.356764	0.155127	1	1	1	1	1	Oo
16833	7.36796	9.77732	10.1987	9.28672	7.4449	6.012	1.339	-1.8825	-3.596	-6.7805	3.95613e-07	0.104159	0.00262669	2.15387e-05	8.70076e-09	1	0.5	1	1	1	Oo
16834	6.72993	6.22304	6.29829	6.10697	6.17607	-1.434	0.0615	-0.1615	0.0525	-0.093	0.149118	0.379998	0.444421	0.689862	0.690294	1	1	1	0.5	1	OoCcMur
16835	6.68642	6.1676	5.72573	5.64234	5.83432	-1.433	-1.358	-1.06	1.142	1.078	0.0112351	0.0640226	0.779894	0.497389	0.644896	1	1	0	0	0	OoCcMur
16842	4.83539	6.24768	6.9745	7.65534	7.59445	2.8885	1.661	1.6085	-0.046	1.537	1.25721e-05	0.0430859	0.0172811	0.759412	0.0308238	0.5	0	1	1	1	Oo
16847	5.62487	5.95888	6.60311	6.68542	6.4644	0.336	1.563	0.078	-1.167	-0.138	0.294262	0.0808915	0.23261	0.604484	0.0813932	0	0	0.5	0.5	0.5	Oo
16852	6.06907	5.94986	4.91888	3.53545	2.90053	-1.086	-2.043	-2.609	-1.553	-4.051	0.856846	0.17795	0.0813484	0.480492	0.00627163	0	1	0	0	0	OoCcMur
16865	7.94683	7.75962	8.4085	8.33211	8.33353	-1.1475	1.5725	-1.0545	0.001	-0.055	0.490039	0.00100199	0.695535	0.786274	0.631799	1	0.5	1	1	1	Oo
16875	10.6269	10.3132	10.1438	10.0715	10.1139	-1.243	-1.125	-1.051	1.03	-1.021	0.017985	0.28919	0.705388	0.845479	0.855303	1	1	1	1	1	Oo
16876	4.67352	4.07035	4.28793	4.26101	4.39314	-1.519	0.2155	-1.019	0.1195	0.095	0.049885	0.263029	0.958108	0.377952	0.277935	0	0.5	0	0.5	0.5	Oo
16881	9.07196	8.4082	7.4229	7.34492	7.29861	-1.584	-1.98	-1.056	-1.033	-1.09	0.000700099	0.000118618	0.768751	0.873697	0.544233	1	1	1	1	1	Oo
16882	7.5148	8.03844	7.73125	7.85332	7.85394	1.528	-1.2395	1.091	0.0005	0.0995	0.466422	0.151295	0.574041	0.103298	0.287021	1	1	1	1	1	Oo
16885	7.13206	6.36503	6.01366	6.48188	6.72478	-1.702	-1.276	1.383	1.183	1.637	2.3035e-06	0.0176045	0.00291337	0.12548	2.38764e-05	0	0	0	0	1	Oo
16886	6.09427	6.79389	7.2081	7.43045	7.74133	1.63	1.3675	1.178	0.2715	1.4525	0.00060726	0.365512	0.490048	0.489353	0.0127497	0	0	0.5	0.5	1	Oo
16891	6.33385	5.51107	5.57314	5.89475	6.22504	-1.769	1.044	1.25	1.257	1.571	0.000325497	0.831303	0.211833	0.218665	0.00546286	0	0	0	1	1	OoCc
16897	8.30491	9.98539	9.87964	9.22853	9.17708	3.205	-1.076	-1.57	-1.036	-1.627	1.88231e-10	0.533437	0.000345697	0.806872	6.58679e-05	1	1	1	1	1	Oo
16898	12.2103	12.099	11.8392	11.7153	11.5243	-0.0905	-1.1975	-1.092	-1.1415	-1.2475	0.226836	0.105011	0.566692	0.290208	0.0616684	1	1	1	1	1	Oo
16905	7.46529	7.90035	7.9105	8.23134	8.41437	1.36467	-0.32	1.25933	0.477667	1.46	0.0796291	0.313659	0.30689	0.377408	0.261302	1	0.666667	0.666667	1	1	Oo
16906	8.29129	7.42824	6.98491	7.26259	7.48238	-1.819	-1.36	1.212	1.165	1.412	3.14284e-05	0.0304527	0.197143	0.340253	0.0102194	0	1	0	1	1	OoMur
16922	4.52142	4.31585	5.09607	5.6476	5.77874	-1.153	1.717	1.466	1.095	1.605	0.613405	0.108744	0.29514	0.846965	0.129068	0	0	1	1	1	Oo
16923	6.15168	5.77444	6.28348	5.74246	6.40301	-1.299	1.423	-1.455	1.581	1.086	0.190628	0.147914	0.143727	0.0895389	0.737045	0	1	1	1	1	Oo
16924	6.12906	5.41921	5.23776	5.62139	5.55138	-1.6375	-0.1445	1.342	-0.055	1.2505	0.000904941	0.52077	0.416555	0.415142	0.137237	0.5	1	0.5	0	0.5	OoMur
16939	5.82849	5.95095	6.09193	5.95478	6.28928	1.089	1.103	-1.1	1.261	1.147	0.689353	0.737674	0.764671	0.430655	0.579122	1	1	1	0	1	OoCc
16956	5.30109	6.23326	7.40585	7.58761	7.48414	1.916	2.256	1.1345	-1.0745	1.056	0.000583012	0.00168691	0.560967	0.766303	0.771042	0.5	0.5	0.5	0.5	1	Oo
16971	4.91375	6.8374	6.98923	7.42969	7.81477	3.794	1.111	1.357	1.306	1.772	1.41248e-09	0.493612	0.0404148	0.0924024	0.000216399	1	0	1	1	1	OoMur
16974	3.29322	6.10027	6.07181	6.48148	6.11379	6.999	-1.02	1.328	-1.29	1.03	4.75581e-07	0.964327	0.436966	0.509523	0.932536	0	0	0	0	1	Oo
16976	7.39243	8.13386	7.75799	7.22716	6.74094	1.67275	-1.30125	-1.4855	-1.4165	-2.05525	0.000134016	0.0598569	0.0417874	0.0799211	6.77366e-05	1	0.75	0.5	0.5	0.5	Oo
16978	7.25972	8.24359	8.63529	9.41416	9.11082	2.0035	1.318	1.732	-0.294	1.416	0.000542638	0.207184	0.0143595	0.303112	0.255293	1	0.5	1	1	1	OoCc
16985	6.23996	6.53922	7.19705	7.80649	7.74825	1.231	1.578	1.526	-1.041	1.465	0.0841923	0.00359208	0.00649825	0.841514	0.0066296	1	0	1	1	1	Oo
16987	7.84649	7.17587	6.75196	6.79854	6.5366	-1.592	-1.342	1.033	-1.199	-1.161	0.00436534	0.112978	0.895213	0.397443	0.396138	1	1	1	1	1	OoCc
16993	4.91678	4.72246	4.59866	5.26964	5.61626	-1.144	-1.09	1.592	1.272	2.025	0.511173	0.764564	0.0702379	0.400809	0.00371629	0	0	0	0	1	Oo
16997	6.23387	7.45988	7.37237	7.34185	7.33392	2.339	-1.063	-1.021	-1.006	-1.027	1.46058e-07	0.676111	0.901241	0.976523	0.843734	1	1	1	1	1	Oo
16998	7.53748	6.07874	5.5724	5.07575	5.69857	-2.749	-1.42	-1.411	1.54	1.091	5.37613e-05	0.159271	0.192981	0.115249	0.727951	1	1	1	0	1	Oo
17025	8.624	7.81857	7.74686	7.63219	7.6703	-1.748	-1.051	-1.083	1.027	-1.055	0.000314798	0.797388	0.689568	0.907811	0.749045	1	1	1	1	1	Oo
17064	5.0482	1.82066	2.27742	3.02537	1.76147	-9.367	1.372	1.679	-2.401	-1.43	0.000653655	0.69389	0.526648	0.26949	0.609011	0	1	0	0	0	Oo
17079	6.26166	5.99837	6.01	6.20474	6.32998	-1.2	1.008	1.145	1.091	1.248	0.0525136	0.957791	0.268068	0.522973	0.0354037	0	1	1	0	1	Oo
17083	7.32046	7.1373	6.96995	6.98457	7.01817	-1.135	-1.123	1.01	1.024	1.034	0.157823	0.302227	0.948123	0.877521	0.764075	1	0	0	0	1	Oo
17087	5.55255	7.34105	6.5893	7.02517	6.80791	3.455	-1.684	1.353	-1.163	1.164	2.5549e-08	0.00339669	0.078688	0.434097	0.329267	1	1	1	1	1	Oo
17089	9.41835	9.01374	9.09825	9.2425	9.13699	-1.324	1.06	1.105	-1.076	1.027	0.00109893	0.570652	0.330642	0.516555	0.780659	1	1	1	1	1	Oo
17096	6.17957	5.42585	5.97041	7.09852	7.52459	-1.686	1.459	2.186	1.344	2.937	0.00203112	0.0470364	0.00035422	0.154152	4.34552e-06	0	0	0	0	1	Oo
17101	7.30134	7.62204	7.24699	7.56695	8.12988	1.249	-1.297	1.248	1.477	1.844	0.135389	0.151978	0.254412	0.0546528	0.000988176	1	1	1	1	1	Oo
17113	8.17947	7.85082	7.70006	7.39974	7.25502	-1.2575	-1.112	-1.2395	-1.107	-1.364	0.0762643	0.505685	0.296868	0.548372	0.0327492	1	0.5	0.5	0.5	0.5	Oo
17117	6.92827	6.01902	6.62453	6.09543	5.60847	-1.878	1.522	-1.443	-1.401	-2.022	5.89585e-05	0.00998235	0.0242872	0.0541902	6.37353e-05	1	1	1	1	1	Oo
17118	5.66274	4.27052	4.25489	3.99406	4.34954	-2.625	-1.011	-1.198	1.279	1.068	3.76383e-05	0.972913	0.491638	0.346454	0.780659	0	0	1	0	1	Oo
17119	7.98356	9.49105	9.95145	10.7158	11.1635	2.843	1.376	1.699	1.364	2.317	2.05745e-08	0.0237166	0.000580574	0.054973	1.6566e-06	1	0	1	1	1	Oo
17122	6.39564	7.11178	8.05497	8.08257	7.63002	1.643	1.923	1.019	-1.368	-1.343	0.00118886	0.000659257	0.934235	0.0914172	0.0579199	1	1	1	1	1	Oo
17123	5.45913	5.57892	5.76677	5.9361	5.87248	1.087	1.139	1.125	-1.045	1.076	0.513901	0.420834	0.504972	0.8345	0.628318	0	1	0	1	1	Oo
17125	8.08145	7.55264	7.1023	7.32245	7.70968	-1.5315	-1.3775	1.165	1.308	1.5235	0.445713	0.184196	0.417479	0.168579	0.010883	1	1	1	1	1	OoMur
17126	8.27478	9.32452	9.45078	9.13563	9.3343	2.07	1.091	-1.244	1.148	-1.084	1.27569e-07	0.450224	0.054315	0.259246	0.439139	1	1	1	1	1	Oo
17127	7.64522	8.08431	8.3856	8.26773	8.57796	1.392	1.2345	-0.0985	1.257	1.143	0.300837	0.215762	0.273054	0.406881	0.30946	1	0.5	1	0.5	1	Oo
17128	9.4554	9.42657	9.23965	9.24791	9.15054	0.308	-1.142	0.339	-1.071	-0.398667	0.391067	0.464766	0.821882	0.677535	0.562861	1	1	1	1	1	Oo
17129	7.23028	7.53665	7.45366	6.31192	5.88322	1.2435	-0.067	-2.683	-0.4675	-4.8965	0.36392	0.600899	0.224889	0.266207	0.492008	1	0.5	1	0.5	0.5	OoCcMur
17132	4.40329	7.161	6.71007	4.89731	3.59628	6.763	-1.367	-3.513	-2.464	-8.657	0.000337091	0.647613	0.0299592	0.18314	0.000298824	1	0	1	0	0	Oo
17134	7.25301	7.49984	7.22392	7.28715	7.04395	1.187	-1.211	1.045	-1.184	-1.133	0.135313	0.172221	0.80384	0.282938	0.34225	1	1	1	1	1	Oo
17135	6.66248	6.30873	6.40576	6.09036	5.87878	-1.278	1.07	-1.244	-1.158	-1.441	0.159124	0.78806	0.34841	0.572172	0.0624167	1	1	1	1	0	OoMur
17147	4.98767	5.45084	5.12708	5.20749	5.43251	1.379	-1.252	1.057	1.169	1.236	0.0121021	0.132636	0.766071	0.360321	0.124153	0	0	0	0	1	Oo
17149	9.11093	9.88438	9.76458	9.82519	10.0124	1.709	-1.087	1.043	1.139	1.187	0.000254093	0.625391	0.829108	0.473489	0.226569	1	0	1	1	1	Oo
17150	4.02439	9.17825	9.35048	9.2379	9.02889	35.601	1.127	-1.081	-1.156	-1.25	1.30377e-13	0.588611	0.755569	0.552012	0.229481	1	0	1	1	1	Oo
17151	8.07661	11.0536	11.2248	11.0737	11.1808	7.874	1.126	-1.11	1.077	-1.031	1.20432e-15	0.132537	0.213507	0.417482	0.699414	1	1	1	1	1	Oo
17155	7.46485	5.43802	4.53664	6.87576	7.13249	-4.1425	-1.917	5.0615	0.271	6.648	2.44617e-07	0.00171707	2.815e-06	0.0404048	1.73612e-08	0.5	1	0	1	1	OoMur
17156	7.01297	6.49952	6.33718	6.41767	6.14094	-1.427	-1.119	1.057	-1.211	-1.146	0.00997735	0.514333	0.780727	0.288092	0.369046	0	1	0	0	0	Oo
17158	7.24428	6.82297	6.84721	6.80512	7.16845	-1.339	1.017	-1.03	1.286	1.249	0.0576421	0.944592	0.905846	0.221372	0.1941	1	1	1	1	1	Oo
17159	7.79516	7.89498	7.49125	6.94916	6.95839	1.072	-1.323	-1.456	1.006	-1.447	0.415557	0.00933312	0.00114355	0.965394	0.000592504	1	0	1	0	0	Oo
17161	6.89251	6.58413	6.30544	6.43289	6.46435	-1.2475	-1.2135	1.0925	0.0245	0.1245	0.343952	0.398892	0.745368	0.708282	0.649735	0.5	1	0.5	0.5	0.5	Oo
17165	6.67856	7.00575	7.25925	7.01324	6.84758	1.255	1.192	-1.186	-1.122	-1.33	0.0549186	0.220684	0.264796	0.496842	0.0315722	1	0	1	1	1	Oo
17168	6.67898	7.11975	7.1629	6.96333	6.96027	1.357	1.03	-1.148	-1.002	-1.151	0.0325477	0.887744	0.474409	0.992691	0.382922	1	1	1	0	1	OoMur
17169	7.29669	5.80105	5.65704	3.6525	1.6609	-2.82	-1.105	-4.013	-3.977	-15.957	0.00503251	0.845727	0.00260415	0.00634301	8.29927e-07	0	1	0	0	0	Oo
17174	6.65928	6.45012	6.73796	7.06944	7.13353	-0.1895	1.2235	1.2665	1.0455	1.3255	0.122256	0.199083	0.268764	0.806258	0.154095	0.5	0.5	0.5	1	1	Oo
17184	9.94842	9.57022	9.74948	9.86474	9.98689	-1.32833	1.13667	1.085	0.427333	1.18133	0.195574	0.431216	0.599305	0.43167	0.195551	1	1	1	1	1	Oo
17190	7.62189	7.79611	7.85426	7.76146	7.75949	1.128	1.041	-1.066	-1.001	-1.068	0.149834	0.732277	0.593761	0.992192	0.503529	1	1	1	1	1	Oo
17192	6.04358	6.17813	5.86409	5.05557	5.1119	1.098	-1.243	-1.751	1.04	-1.684	0.638984	0.380832	0.0232739	0.906648	0.0196629	1	0	0	0	0	Oo
17193	6.73566	6.47321	6.18846	6.67836	6.21373	-0.2455	-1.2255	1.416	-1.417	0.025	0.139884	0.402652	0.235955	0.295731	0.0795999	1	1	0	1	0.5	Oo
17195	10.584	10.9955	11.3475	11.3364	11.0603	1.33	1.276	-1.008	-1.211	-1.22	0.0553403	0.174854	0.975613	0.347715	0.230553	1	1	1	1	1	Oo
17196	5.23732	5.94264	6.02888	6.10904	5.87504	1.718	0.0645	1.0585	-1.187	-1.116	0.175854	0.764934	0.831122	0.549142	0.610109	0	1	0	0	0	OoCc
17201	5.97848	5.44957	5.3181	5.97347	5.76858	-1.443	-1.095	1.575	-1.153	1.366	0.0767201	0.752353	0.0815895	0.650749	0.178087	0	1	0	0	0	Oo
17210	9.18938	7.85814	8.0351	7.2587	6.29882	-2.6056	0.7406	-1.7334	-1.9484	-3.408	3.71738e-06	0.468323	0.00252634	0.000282528	4.91562e-08	1	1	1	0.8	0.8	Oo
17215	6.55392	6.54645	6.56421	6.31014	6.80821	-0.00175	0.51025	-1.196	1.42775	0.698	0.112377	0.588547	0.446191	0.191364	0.392018	0.5	0.25	0.5	0.5	1	OoMur
17216	8.85007	8.93353	8.63032	9.17726	9.49219	1.0595	-0.2655	1.4805	1.263	1.8175	0.681991	0.486644	0.0768237	0.451449	0.00294899	1	1	1	1	1	Oo
17217	9.06015	8.99466	9.03794	9.12318	9.53365	-0.072	0.034	1.061	1.334	1.4125	0.000439069	0.364642	0.72034	0.0973869	0.0140903	1	1	1	1	1	Oo
17218	9.34423	9.81094	9.69674	9.63799	9.96884	1.425	-1.084	-1.0415	1.276	1.2245	0.161928	0.639172	0.789087	0.343506	0.438836	1	0.5	1	1	1	Oo
17219	8.77929	8.90938	8.65338	8.78626	8.79208	0.128	-1.195	1.1005	0.0045	1.101	0.0343663	0.283885	0.660448	0.655986	0.521851	1	0.5	1	1	1	Oo
17220	7.45289	7.74223	7.7471	7.77514	8.16985	0.8055	0.0035	0.0255	1.3165	1.35475	0.153833	0.760268	0.554821	0.0912151	0.113751	1	0.5	1	1	1	Oo
17222	6.16514	6.88079	7.3149	6.94392	7.18544	1.54767	1.36833	-1.296	0.528667	0.222333	0.0253983	0.49698	0.524982	0.612024	0.817554	0.666667	0.333333	0.666667	0	0.333333	OoMur
17237	9.05493	9.04854	9.08408	9.14406	9.15221	-0.0055	0.0285	0.0475	0.006	0.05	0.0766084	0.312316	0.331196	0.639176	0.696456	0.5	0.5	0.5	1	0.5	Oo
17245	6.74441	6.78756	7.21628	6.87533	6.78609	0.032	1.354	-0.316	-0.066	-0.4265	0.648825	0.182439	0.432924	0.776438	0.416669	1	0.5	1	1	1	Oo
17246	7.73593	8.33221	8.25327	8.27251	8.09172	1.007	-0.066	0.015	-0.144	-1.119	0.00155587	0.262364	0.523007	0.550099	0.442069	1	0.5	1	1	1	OoCc
17248	8.05744	8.92705	9.69342	9.86088	9.92886	1.40467	1.99	0.468667	-0.262333	0.524667	0.0916004	0.272241	0.504457	0.313038	0.451901	1	1	1	1	1	Oo
17250	8.60528	7.88812	7.46621	7.40234	7.84845	-1.644	-1.34	-1.045	1.362	1.303	0.000125272	0.0295622	0.790437	0.0387	0.0322448	1	1	1	1	1	OoCc
17252	6.74668	8.14495	8.64687	8.29814	8.07905	2.665	1.42	-0.374	-0.221	-0.898	1.85916e-05	0.0869131	0.141613	0.11582	0.00405034	1	1	1	1	1	Oo
17254	7.34901	8.81478	9.50163	9.53653	9.2631	2.762	1.61	1.024	-1.209	-1.18	2.66754e-10	6.76646e-05	0.844686	0.0785057	0.0647913	1	1	1	1	1	Oo
17256	7.77356	8.22031	8.56623	8.59387	8.5919	1.3995	1.271	0.02	-0.0015	0.0185	0.26966	0.228242	0.942268	0.818749	0.836295	1	0.5	1	1	1	Oo
17257	7.62193	6.92275	6.47419	6.7573	6.64211	-1.81533	-1.39567	0.013	-1.08367	-0.104667	0.13518	0.252902	0.311916	0.724713	0.0925693	0	1	0	0	0	OoCc
17258	6.87306	5.69603	5.47525	4.93936	4.00447	-2.406	-1.16775	-1.45325	-1.987	-2.90775	0.0121811	0.559771	0.19878	0.0989565	0.0067847	0.75	1	0.5	0.5	0.25	Oo
17259	6.46796	7.8249	7.67401	7.91556	7.96622	2.561	-1.11	1.182	1.036	1.225	2.98573e-08	0.435646	0.215097	0.841524	0.0832479	1	1	1	1	1	Oo
17261	8.3442	8.4107	8.03675	8.03636	8.07345	0.077	-1.2995	-0.0005	1.026	0.034	0.00621563	0.277733	0.204341	0.911172	0.165426	0.5	1	0.5	0.5	0.5	Oo
17263	7.83944	7.73055	7.67253	8.06953	7.9772	-0.0925	-0.046	1.356	-0.0715	1.246	0.211494	0.474319	0.450485	0.574462	0.350965	1	1	1	1	1	Oo
17274	7.88507	8.07203	8.16138	8.09444	8.02293	0.193	0.0675	-0.0495	-1.052	-0.1065	0.0222899	0.662857	0.696663	0.749583	0.520958	0.5	1	0.5	0.5	1	Oo
17279	8.64107	8.75912	9.20511	9.2446	9.24107	1.085	1.362	1.028	-1.002	1.025	0.319552	0.00403915	0.829953	0.986297	0.811877	1	1	1	1	1	OoCcMur
17281	7.47978	8.21386	7.92989	8.26474	8.53841	1.663	-1.218	1.261	1.209	1.525	0.000127472	0.147947	0.101239	0.208872	0.00198203	1	1	1	1	1	Oo
17283	5.72902	6.37529	6.7834	6.85082	6.85213	1.565	1.327	1.048	1.001	1.049	6.04145e-05	0.013897	0.73511	0.994731	0.667992	1	0	1	1	1	Oo
17287	6.20026	5.96844	5.90352	6.15525	6.13117	-1.174	-1.046	1.191	-1.017	1.171	0.126174	0.761406	0.200082	0.923966	0.182605	1	1	0	1	1	Oo
17289	5.03348	6.59208	6.37873	6.95994	6.92719	2.946	-1.159	1.496	-1.023	1.463	3.0628e-07	0.419647	0.0257463	0.923943	0.0200602	1	0	1	1	1	Oo
17292	5.25905	5.08281	5.31739	5.1802	4.43333	-1.13	1.177	-1.1	-1.678	-1.846	0.53356	0.524758	0.747696	0.0506353	0.00723113	0	0	1	1	1	Oo
17293	5.71552	8.14407	8.83989	8.55729	8.67863	5.384	1.62	-1.216	1.088	-1.118	7.36325e-11	0.00248546	0.209534	0.64461	0.421739	1	0	1	1	1	Oo
17294	5.88481	8.5635	9.29811	9.26037	9.3264	6.403	1.664	-1.027	1.047	1.02	4.71766e-13	0.000164851	0.855762	0.755874	0.868792	1	0	1	1	1	Oo
17299	5.42301	5.37557	5.54839	5.30696	5.19869	-1.033	1.127	-1.182	-1.078	-1.274	0.855027	0.601726	0.479569	0.785582	0.208268	0	1	0	0	0	Oo
17300	5.85531	6.22586	6.17343	6.11357	6.16753	1.293	-1.037	-1.042	1.038	-1.004	0.0145562	0.804025	0.788175	0.823251	0.975703	1	0	1	0	1	Oo
17304	7.57567	6.65466	6.4384	6.84469	6.4868	-1.893	-1.162	1.325	-1.282	1.034	0.000694046	0.490418	0.192689	0.277791	0.876168	0	1	0	0	0	Oo
17305	5.19771	6.50206	7.7321	7.35917	7.3224	2.47	2.346	-1.295	-1.026	-1.328	1.71596e-05	0.000288451	0.229199	0.926735	0.12579	1	0	1	1	1	Oo
17308	7.46823	7.31525	7.79104	7.93208	8.00366	-1.112	1.391	1.103	1.051	1.159	0.308549	0.0122936	0.504082	0.765219	0.211032	1	0	1	1	1	Oo
17311	4.87771	4.82685	5.32655	6.04223	6.25662	-1.036	1.414	1.642	1.16	1.905	0.864532	0.145659	0.0446305	0.611643	0.00532211	0	0	0	1	1	OoCc
17312	5.08546	7.17137	8.29856	7.50716	7.79941	4.245	2.184	-1.731	1.225	-1.413	5.16719e-08	0.000714535	0.0104485	0.386537	0.0647082	1	0	1	1	1	Oo
17319	9.71772	9.32986	8.84675	8.88521	9.03922	-1.308	-1.398	1.027	1.113	1.143	0.0330908	0.028233	0.89356	0.560387	0.345571	1	0	1	1	1	Oo
17330	6.35773	5.73946	5.93744	6.03849	5.73529	-0.842	1.148	1.073	-1.245	-1.1565	0.0524931	0.524816	0.785484	0.44598	0.543637	0	0.5	0	0.5	1	Oo
17342	7.4277	7.26701	7.487	7.11226	6.76837	-1.118	1.165	-1.297	-1.269	-1.646	0.333752	0.289687	0.0759756	0.123071	0.000650027	1	1	1	1	1	OoCc
17344	9.35674	7.6743	7.63551	7.52308	7.73641	-3.36667	0.302	-0.426667	0.516333	1.07333	1.91709e-08	0.582664	0.496897	0.47293	0.623459	1	1	1	1	1	Oo
17345	8.49375	9.58763	9.22119	9.32562	9.27295	2.134	-1.289	1.075	-1.037	1.037	1.14387e-07	0.0269949	0.585891	0.809549	0.755201	1	1	1	1	1	Oo
17346	6.54474	7.18253	7.5559	7.52729	7.54376	1.557	1.2955	-0.0205	0.0145	-0.01	0.0025927	0.0631971	0.785289	0.146704	0.143708	0.5	0.5	0.5	0.5	1	OoCc
17347	8.97719	7.48761	7.31995	7.20593	6.8869	-2.808	-1.123	-1.082	-1.247	-1.35	4.94766e-07	0.534027	0.708891	0.248701	0.0593259	1	1	1	1	1	Oo
17349	6.0273	5.31446	5.46443	4.93725	5.70597	-1.639	1.11	-1.441	1.704	1.182	0.00270761	0.611462	0.0570966	0.0135106	0.336483	0	1	0	0	0	OoCcMur
17350	6.95721	6.63193	6.87749	7.03072	6.67642	-1.253	1.186	1.112	-1.278	-1.15	0.0123635	0.105165	0.358213	0.038501	0.151117	1	1	1	1	1	Oo
17354	8.28272	9.5443	10.0981	10.2424	10.3609	2.398	1.468	1.105	1.086	1.2	7.2624e-09	0.00120291	0.395229	0.51795	0.0625975	1	1	1	1	1	Oo
17355	4.7543	6.70011	6.30141	6.12626	6.44276	6.29567	-1.34133	-0.479667	0.649333	0.468	0.00577137	0.35064	0.579157	0.152548	0.108868	0.666667	0.333333	0.333333	0.333333	1	Oo
17356	11.5077	10.8745	10.3725	10.2197	10.6523	-1.551	-1.416	-1.112	1.35	1.214	0.00167121	0.0281856	0.564423	0.101368	0.184328	1	1	1	1	1	Oo
17357	7.88781	6.12054	5.26039	4.75407	5.09145	-4.36625	-1.57725	-1.4755	0.8695	-0.6365	0.15767	0.222487	0.374996	0.644957	0.587024	0.5	1	0.5	0.5	0.5	Oo
17390	6.79246	7.66345	8.29517	8.92569	8.81767	1.8555	1.552	1.55	-0.0855	1.4415	0.000343533	0.00449347	0.00415997	0.432084	0.00749282	1	0	1	1	1	OoMur
17420	5.77539	6.39714	6.95192	7.34685	7.01711	1.539	1.469	1.315	-1.257	1.046	0.0080562	0.0424296	0.168374	0.279814	0.816838	0	0	1	1	1	Oo
17423	5.35851	5.80402	5.67451	5.50785	5.92205	1.362	-1.094	-1.122	1.333	1.187	0.0817246	0.715417	0.656999	0.228871	0.399895	0	1	0	0	0	Oo
17425	7.53933	7.86117	7.9785	7.99982	8.16781	0.306	1.085	1.015	1.1235	1.1405	0.203758	0.541984	0.926932	0.418262	0.247379	1	1	1	1	1	Oo
17427	5.37959	5.20686	4.79888	4.3841	3.77448	-1.127	-1.327	-1.333	-1.526	-2.034	0.622499	0.349783	0.368882	0.189623	0.0106185	0	1	0	0	0	OoCc
17434	6.94741	7.02959	6.99758	7.19186	6.99112	0.066	-1.0225	1.1485	-1.1555	-0.005	0.229377	0.899958	0.474259	0.503938	0.908718	1	1	1	1	1	OoMur
17436	6.62634	9.56254	9.96415	9.94713	9.89952	9.9835	1.33	-1.012	-1.0335	-1.0465	1.83713e-07	0.356284	0.969641	0.913487	0.841048	1	0.5	1	1	1	OoCcMur
17448	11.1642	10.8905	10.657	10.5595	10.4645	-0.24	-1.1755	-1.07	-1.0685	-1.143	0.344148	0.16007	0.626497	0.646482	0.219199	1	1	1	1	1	Oo
17449	9.28475	8.43117	8.5822	8.84748	9.07684	-1.88433	0.468667	1.215	0.530667	1.50067	0.0155277	0.377271	0.496445	0.592388	0.385826	1	0.666667	1	1	1	OoMur
17450	7.279	7.27517	7.09084	7.38937	7.52576	-1.003	-1.136	1.23	1.099	1.352	0.981657	0.351379	0.134767	0.5551	0.015574	1	1	1	1	1	Oo
17451	6.05059	10.8731	11.4585	11.1162	11.1477	28.296	1.5	-1.268	1.022	-1.24	1.89411e-14	0.0154083	0.16804	0.922246	0.151682	1	0	1	1	1	Oo
17463	5.85082	6.12345	6.49261	6.707	6.37899	1.208	1.292	1.16	-1.255	-1.082	0.240213	0.196271	0.512041	0.307493	0.688139	1	0	1	1	1	Oo
17470	4.36561	5.39456	6.10819	6.82346	7.12935	2.041	1.64	1.642	1.236	2.03	0.000399353	0.0231521	0.0258216	0.390039	0.00116777	0	0	0	1	1	OoMur
17475	6.90547	8.07171	7.88133	8.00535	7.88205	2.9255	-1.1425	1.092	-0.0965	0.0005	0.407576	0.562323	0.755361	0.693121	0.768524	0.5	1	0.5	0.5	0.5	OoCcMur
17527	5.58777	0.33303	0.962496	1.31639	1.21028	-38.18	1.547	1.278	-1.076	1.187	1.61135e-05	0.625067	0.810672	0.947445	0.837395	0	1	0	0	0	OoCc
17532	4.97144	5.06572	5.01155	4.75003	5.1306	1.068	-1.038	-1.199	1.302	1.086	0.630219	0.848517	0.301376	0.138175	0.606015	0	1	0	0	0	OoMur
17533	5.02638	5.14801	5.72704	7.11057	7.26606	1.088	1.494	2.609	1.114	2.906	0.524034	0.0145778	8.22872e-06	0.580634	6.63574e-07	0	0	1	1	1	Oo
17535	7.6824	7.29263	7.31903	7.42496	7.28724	-1.31	1.018	1.076	-1.1	-1.022	0.00673868	0.899282	0.585891	0.480492	0.855303	1	1	1	1	1	Oo
17536	6.37108	10.3988	11.0592	11.4277	11.1935	33.0577	1.586	1.29867	-1.17967	1.10167	7.79283e-11	0.0497287	0.340534	0.5494	0.634131	1	0.333333	1	1	1	OoCcMur
17540	5.3541	7.06145	5.36785	5.5304	4.84683	3.364	-3.235	1.1195	-1.6405	-1.4675	0.000621373	0.00104688	0.78506	0.273584	0.345803	1	0	0	0	0	Oo
17684	5.11267	8.16518	8.32596	8.4668	8.63215	11.105	1.118	1.1055	1.1285	1.2375	2.69346e-08	0.509229	0.579488	0.634312	0.152763	0.5	0.5	0.5	0.5	1	OoMur
17685	7.76845	8.47337	8.34276	7.95934	8.37441	1.63	-1.095	-1.304	1.333	1.022	3.78933e-05	0.464835	0.0280209	0.0297171	0.857413	1	0	1	1	1	Oo
17686	5.88121	6.18654	6.74413	6.65982	6.39905	0.3075	1.523	-1.0605	-0.253	-0.3335	0.0958229	0.207492	0.700965	0.118121	0.220814	1	0	0.5	1	0.5	OoCc
17688	9.0247	9.33181	9.58622	9.89056	9.96708	1.237	1.193	1.235	1.054	1.302	0.0874299	0.249977	0.188424	0.792604	0.0584579	1	1	1	1	1	Oo
17692	9.52574	10.1317	9.7161	9.22725	9.26207	1.522	-1.334	-1.403	1.024	-1.37	0.000353075	0.022932	0.0099241	0.888711	0.00846423	1	1	1	1	1	Oo
17713	9.46555	8.77622	8.50745	7.71554	7.67592	-1.613	-1.205	-1.731	-1.028	-1.78	0.000272051	0.177369	0.000509147	0.885908	0.000132954	1	1	1	1	1	Oo
17714	9.72412	8.60014	8.16629	7.65962	6.56974	-2.179	-1.351	-1.421	-2.129	-3.024	2.33031e-06	0.0421272	0.0216933	0.00022154	1.6068e-07	1	1	1	1	1	Oo
17749	9.6076	9.24495	9.31236	9.58817	9.91564	-1.286	1.048	1.211	1.255	1.519	0.0323486	0.773644	0.199142	0.139473	0.0026372	1	1	1	1	1	Oo
17755	4.67769	5.61706	6.76105	6.81637	6.50256	2.098	2.249	0.042	-1.249	-1.1965	0.100356	0.00589386	0.704192	0.427708	0.390665	1	0	1	1	1	Oo
17756	7.101	6.82893	7.19764	6.45911	5.94513	-1.208	1.291	-1.668	-1.428	-2.383	0.355183	0.34405	0.0449238	0.240522	0.000682012	0	1	1	0	0	OoMur
17758	7.89419	8.84051	8.27176	8.55919	9.00336	2.037	-1.484	1.2295	1.366	1.6615	0.00988902	0.0264787	0.393717	0.164512	0.00329581	1	1	1	1	1	OoCc
17761	7.26864	7.56976	7.07061	6.97092	6.97942	0.278	-1.418	-0.0895	0.006	-0.0845	0.351658	0.0404363	0.231243	0.897708	0.14008	1	1	0.5	1	1	OoMur
17763	9.34605	9.53285	9.5603	9.81261	9.51746	0.162	0.0195	1.191	-1.2285	-0.031	0.18351	0.858478	0.142514	0.146147	0.712109	1	1	1	1	1	OoMur
17764	7.58372	8.29884	8.32998	8.35852	8.55446	1.805	0.355667	0.357333	1.14533	0.526667	0.282291	0.839669	0.367587	0.507406	0.244123	1	0.333333	1	1	1	OoCcMur
17765	7.2688	7.35528	7.38007	7.3503	7.20485	0.2808	-0.1772	0.1108	-0.3262	-0.1652	0.305655	0.605351	0.216672	0.450364	0.314723	0.8	1	0.8	0.8	0.8	OoCc
17766	8.49906	9.12358	8.87161	8.85845	8.79458	1.542	-1.191	-1.009	-1.045	-1.055	1.55113e-06	0.0292418	0.933246	0.653765	0.480497	1	1	1	1	1	Oo
17768	7.70425	9.16913	9.45417	9.58335	9.27873	2.897	1.2185	0.1045	-1.236	-1.1375	0.000123788	0.206175	0.405727	0.240722	0.581285	1	1	1	1	1	Oo
17769	5.91801	6.2313	6.36201	6.45397	6.52069	1.243	1.095	1.066	1.047	1.116	0.0642172	0.558784	0.714612	0.807519	0.413344	0	1	0	1	1	Oo
17771	5.60003	5.73999	5.61979	5.40772	4.91231	1.102	-1.087	-1.158	-1.41	-1.633	0.561175	0.718157	0.527831	0.12063	0.0107479	0	1	0	0	0	Oo
17772	6.58929	5.62027	5.07997	3.86203	3.82831	-1.958	-1.454	-2.326	-1.024	-2.381	0.00629132	0.186739	0.00528491	0.951819	0.00212739	1	0	0	0	0	Oo
17775	9.54654	8.9501	8.60696	8.65081	8.99556	-1.512	-1.269	1.031	1.27	1.309	0.000465373	0.0598379	0.849984	0.0865157	0.0228196	1	1	1	1	1	Oo
17776	8.40918	8.34571	7.79071	8.022	8.3512	-1.045	-1.469	1.174	1.256	1.475	0.772118	0.03423	0.428116	0.25503	0.0214864	1	1	1	1	1	Oo
17777	4.71586	3.89523	4.22306	3.36497	3.69805	-1.766	1.255	-1.813	1.26	-1.439	0.219895	0.727468	0.336981	0.754045	0.503243	0	1	0	0	0	Oo
17827	8.6882	8.53645	8.8471	8.81102	8.5246	-1.111	1.2425	-0.027	-1.2215	-1.2505	0.328595	0.131225	0.610665	0.207119	0.0695712	1	1	1	1	1	Oo
17828	8.47979	8.18708	8.52209	8.41544	8.33584	-1.225	1.261	-1.077	-1.057	-1.138	0.0576554	0.0711375	0.630935	0.740329	0.282749	1	1	1	1	1	Oo
17844	6.09553	5.67459	5.9664	6.068	5.10414	-1.339	1.224	1.073	-1.951	-1.818	0.126707	0.40875	0.811966	0.0137365	0.00764802	1	1	0	0	0	Oo
17846	7.87065	7.2746	7.91801	8.26898	8.33747	-1.6255	1.5635	1.2765	0.053	1.3525	0.427186	0.00398003	0.138941	0.497205	0.186929	0.5	0.5	1	1	1	Oo
17847	9.1787	8.72296	8.47448	8.38067	8.04224	-1.106	-1.191	-0.414	-0.626667	-1.35067	0.332607	0.310739	0.300805	0.290237	0.057508	1	1	1	1	1	OoCc
17850	7.45158	7.09467	6.80823	7.05611	6.88348	-1.281	-1.238	1.201	-1.1285	0.0635	0.193488	0.493838	0.524894	0.687617	0.376582	0.5	0.5	0.5	1	0.5	OoCc
17859	7.83925	5.57551	6.3238	5.43776	4.94988	-4.802	1.68	-1.848	-1.402	-2.592	1.31107e-08	0.0117759	0.00419312	0.121689	3.25075e-05	0	1	1	0	0	Oo
17864	6.736	7.49414	7.27118	6.98892	6.976	1.691	-1.167	-1.216	-1.009	-1.227	0.00391656	0.515562	0.402234	0.983898	0.304164	1	1	1	1	1	Oo
17865	6.36213	7.8806	7.91786	7.97852	8.41216	3.3185	0.0275	1.044	1.3535	1.417	2.43487e-05	0.696602	0.869985	0.0939861	0.0293454	1	1	1	1	1	Oo
17872	7.01578	7.27859	7.68181	7.60742	7.79303	1.2	1.322	-1.053	1.137	1.08	0.238764	0.13942	0.829786	0.578383	0.681984	1	0	1	1	1	OoMur
17876	7.7665	6.22723	6.32645	6.40071	7.00795	-2.906	1.071	1.053	1.523	1.604	2.36622e-07	0.722482	0.809518	0.0279823	0.00416765	1	1	1	1	1	Oo
17879	3.11093	3.06074	3.11721	2.86158	3.96937	-1.035	1.04	-1.194	2.155	1.805	0.935762	0.951453	0.773219	0.154152	0.193499	0	0	0	0	1	Oo
17880	2.46277	6.19608	6.31001	6.70555	7.70228	13.3	1.082	1.315	1.995	2.625	2.07494e-06	0.896394	0.635852	0.196605	0.0323301	1	0	0	1	1	Oo
17882	8.02598	8.12798	8.15441	8.4635	8.11106	1.073	1.018	1.239	-1.277	-1.031	0.407508	0.887236	0.0464729	0.037032	0.77686	1	1	1	1	1	Oo
17886	8.90814	8.27599	7.98202	7.71816	7.57802	-1.6765	-1.2275	-1.2005	-0.112	-1.334	0.372099	0.165262	0.212814	0.452923	0.128289	1	1	1	1	1	Oo
17909	8.45353	8.50998	7.87271	7.72714	7.31949	0.376333	-1.55567	-0.442667	-0.721	-1.512	0.343027	0.00530239	0.51389	0.151664	0.255085	1	1	1	0.666667	0.666667	Oo
17910	7.10716	4.9958	5.29667	5.21838	5.95025	-4.321	1.232	-1.056	1.661	1.573	3.37111e-05	0.582829	0.906046	0.18422	0.155238	0	1	0	0	0	Oo
17912	8.05065	8.15457	7.14951	6.99699	7.28688	0.302167	-2.07767	-0.782	0.903833	0.769833	0.126923	0.107994	0.598215	0.460475	0.453235	0.833333	0.666667	0.833333	0.833333	0.833333	Oo
17913	6.17279	8.60915	8.71031	8.70975	9.26475	5.413	1.073	1	1.469	1.469	3.37254e-09	0.753064	0.998523	0.0735751	0.033312	1	1	1	1	1	Oo
17918	7.75783	7.88195	7.37471	7.49548	7.7252	0.429667	-1.42867	0.432667	1.17567	1.30567	0.352899	0.110684	0.66208	0.537086	0.419126	1	0.666667	1	1	1	Oo
17919	9.27523	10.9896	10.713	10.3021	10.3786	4.24767	-1.21967	-1.34267	0.390333	-0.625667	2.32251e-06	0.316899	0.152731	0.639719	0.352087	1	0.666667	1	1	1	Oo
17920	5.9198	5.86642	5.5265	6.06205	6.37705	-1.038	-1.266	1.449	1.244	1.803	0.866067	0.371753	0.164173	0.463038	0.013963	1	1	1	1	1	OoMur
17921	6.09731	5.72736	5.08094	5.02533	5.54329	-1.292	-1.565	-1.039	1.432	1.378	0.191488	0.0618685	0.9036	0.174718	0.147209	0	1	0	0	0	OoCc
17925	7.25158	9.792	9.66958	8.9875	8.66655	5.818	-1.089	-1.604	-1.249	-2.004	1.12483e-11	0.561693	0.00145105	0.129229	1.26045e-05	1	1	1	1	1	Oo
17930	5.23784	7.76098	9.19765	10.8108	10.7538	7.476	2.74733	3.08	-0.376333	2.94933	1.52139e-08	2.15673e-05	4.62697e-06	0.551685	4.18518e-06	0.666667	0	0.666667	1	1	Oo
17931	9.30111	9.474	9.3259	9.83935	10.0101	0.1425	-0.6155	1.45075	1.12975	1.62025	0.407833	0.476441	0.193707	0.696768	0.0487436	0.75	0.75	1	1	1	OoCc
17932	5.89752	4.87829	5.20492	5.71429	6.17523	-2.027	1.254	1.423	1.376	1.959	0.0104847	0.511862	0.310146	0.387482	0.0252923	0	0	0	0	1	Oo
17933	7.11193	5.23589	5.42186	5.38297	5.68332	-3.937	1.146	-0.034	0.2635	1.1985	0.000201327	0.76284	0.539487	0.640628	0.560643	0.5	0.5	0.5	0.5	1	Oo
17936	9.21422	8.97323	8.90621	8.32117	8.564	-1.182	-1.048	-1.5	1.183	-1.268	0.193718	0.803152	0.0137613	0.345603	0.100966	1	1	1	1	1	Oo
17938	10.8203	9.66712	9.82849	10.0507	10.246	-2.273	1.1205	1.1675	1.1505	1.3485	0.000116113	0.532757	0.375623	0.498374	0.169588	1	1	1	1	1	Oo
17940	5.31905	6.31421	7.8524	8.25238	8.26034	1.993	2.904	1.319	1.006	1.327	1.02955e-05	9.00912e-07	0.06942	0.979148	0.0384877	1	0	1	1	1	Oo
17952	6.39698	6.58147	6.57414	6.63441	6.79264	1.136	-1.005	1.043	1.116	1.164	0.399758	0.984156	0.859945	0.631324	0.385618	1	1	1	1	1	Oo
17955	9.49794	10.3869	10.4059	10.5196	10.2789	1.852	1.013	1.082	-1.182	-1.092	4.71412e-06	0.934384	0.585579	0.221812	0.452787	1	1	1	1	1	Oo
17966	6.78265	7.47143	7.64833	7.75549	8.19446	1.6225	0.173	0.082	1.3555	1.4655	0.00229344	0.060373	0.701404	0.137477	0.0211401	1	0.5	1	1	1	Oo
17973	7.43122	7.74612	8.4516	8.64772	8.6075	1.244	1.631	1.146	-1.028	1.114	0.0918667	0.00374721	0.444897	0.89921	0.472639	1	1	1	1	1	Oo
17974	8.49494	7.45935	7.0057	5.72755	5.42675	-2.05	-1.369	-2.425	-1.232	-2.988	3.13928e-06	0.0255361	4.29852e-06	0.172928	8.79205e-08	1	1	1	0	1	Oo
17975	8.43315	7.09091	7.23138	7.3391	7.18668	-2.59275	0.21875	0.08875	-1.1145	-0.05275	0.0209703	0.344959	0.546704	0.764077	0.363357	0.75	1	0.75	0.75	0.75	OoMur
17977	7.40187	6.9717	6.65487	7.05095	7.17473	-1.3475	-1.262	1.3225	0.096	1.4665	0.0139275	0.369227	0.140503	0.548214	0.139547	0.5	1	0.5	0.5	1	Oo
17978	10.7971	10.5342	10.1955	9.9989	10.1821	-1.208	-1.284	-1.1545	0.166	-0.0135	0.386634	0.385233	0.493463	0.261648	0.0676742	1	1	1	1	1	OoCc
17979	7.91387	8.45962	8.49327	8.64755	9.11449	1.46	0.026	1.115	1.3845	1.538	0.00863099	0.586487	0.580216	0.10154	0.00853594	1	1	1	1	1	OoCcMur
17984	5.78328	3.44231	3.27771	2.79732	2.70715	-7.081	-0.485667	-0.838	-0.424667	-1.53567	0.00307327	0.781489	0.532179	0.465692	0.443981	0	1	0	0	0	Oo
17986	4.60059	4.73634	4.72338	4.97485	4.98816	1.099	-1.009	1.19	1.009	1.201	0.478955	0.967392	0.318332	0.968528	0.217457	0	1	0	0	1	Oo
17988	7.0128	3.4683	3.58508	2.57496	3.66285	-12.261	0.1355	-2.017	2.3335	0.0795	2.55336e-05	0.350494	0.21347	0.334733	0.446203	0	1	0	0	0	OoMur
17991	9.83522	9.63781	9.7568	9.73875	9.66113	-1.147	1.086	-1.013	-1.055	-1.069	0.109853	0.455437	0.930612	0.681648	0.508125	1	1	1	1	1	Oo
17992	9.39758	9.0233	8.6254	8.43093	8.06321	-1.296	-1.318	-1.144	-1.29	-1.477	0.00729083	0.0160514	0.260343	0.0419318	0.000732119	1	1	1	1	1	Oo
17993	7.02728	6.7268	6.60462	6.55602	6.65701	-0.647333	-1.08867	-0.37	0.411333	0.369	0.0207971	0.646017	0.341242	0.433614	0.15562	1	1	1	1	1	Oo
17995	10.1156	9.65302	9.31159	9.16805	9.19514	-1.38567	-1.26733	-1.105	1.01933	-1.08433	0.0240954	0.0255421	0.367215	0.899632	0.380552	1	0.666667	1	1	1	Oo
17996	10.1439	7.25424	5.89775	3.64782	3.45918	-7.411	-2.561	-4.757	-1.14	-5.421	0.000938892	0.169719	0.022116	0.919347	0.00808446	1	1	0	0	0	OoMur
17997	7.43227	8.05742	8.12322	8.03796	8.08841	0.8775	0.049	-0.065	0.038	-0.0285	0.00562959	0.572182	0.539301	0.588594	0.125537	1	1	1	1	1	Oo
17999	6.82051	6.42236	6.59674	6.47233	6.62368	-0.429	1.1365	-1.0905	1.112	0.0195	0.0833364	0.510772	0.555387	0.515672	0.721789	1	1	1	1	1	Oo
18000	7.94423	7.30203	7.71732	7.80938	7.42889	-1.561	1.334	1.066	-1.302	-1.221	0.000287301	0.0278814	0.684343	0.0663682	0.0930667	1	1	1	1	1	Oo
18002	9.2701	9.17236	9.01137	8.99121	9.1618	-1.07	-1.118	-1.014	1.126	1.11	0.49084	0.368045	0.931755	0.387545	0.351152	1	1	1	1	1	Oo
18003	4.08671	6.29584	6.96759	6.97008	6.96349	4.62867	1.60167	-0.331667	0.319	0.323	1.02164e-07	0.0624524	0.914612	0.335468	0.304764	0.666667	0.333333	1	1	1	Oo
18004	9.58531	8.05241	7.86049	7.89902	7.83807	-3.346	-0.1555	0.028	-1.043	-0.0165	8.85158e-05	0.498819	0.861913	0.868447	0.753213	1	1	0.5	0.5	0.5	Oo
18005	7.54301	9.69068	9.78951	9.61042	9.78835	4.6915	1.072	-1.132	1.1315	-0.001	2.48449e-11	0.57418	0.323292	0.378442	0.826324	1	0.5	1	1	1	Oo
18007	7.15149	8.9015	8.51756	9.13819	9.20903	5.7215	-0.4845	1.6595	0.0545	0.821	0.248124	0.0669946	0.476982	0.820776	0.468336	0.5	0.5	0.5	0.5	1	Oo
18008	6.63059	6.61262	6.77437	6.97935	6.43367	-1.013	1.119	1.153	-1.46	-1.266	0.947334	0.639125	0.572207	0.110131	0.235254	1	1	0	0	0	Oo
18016	6.15224	7.11876	6.90425	7.37737	7.53068	1.954	-1.16	1.388	1.112	1.544	0.000119319	0.428816	0.0763541	0.62973	0.0106586	1	0	1	1	1	Oo
18019	7.69727	7.62253	7.71738	7.75994	7.59535	-0.0625	0.073	0.031	-1.126	-1.0895	0.364265	0.675305	0.860458	0.673913	0.707363	0.5	0.5	0.5	0.5	1	Oo
18020	7.84827	7.12544	6.73309	6.94953	6.70831	-1.65	-1.313	1.162	-1.182	-1.017	0.000367799	0.0678451	0.360471	0.323229	0.915323	1	1	1	1	1	Oo
18023	7.60982	9.09951	8.48645	8.44571	8.64188	2.808	-1.53	-1.029	1.146	1.114	9.86205e-08	0.00785005	0.887753	0.445416	0.45896	1	1	1	1	1	Oo
18024	5.82114	5.90315	6.4595	6.96556	6.95583	1.058	1.471	1.42	-1.007	1.411	0.645362	0.0116604	0.0223826	0.975033	0.0140128	1	1	1	1	1	Oo
18025	4.14804	4.25031	4.29106	4.87385	4.85567	1.073	1.029	1.498	-1.013	1.479	0.812443	0.951001	0.285237	0.979991	0.228221	0	0	0	1	0	Oo
18028	4.1106	4.40271	4.5828	4.72183	4.47616	1.224	1.133	1.101	-1.186	-1.077	0.181785	0.533681	0.667428	0.429368	0.688684	0	0	0	0	1	OoCcMur
18030	6.15266	6.32344	7.74812	8.01512	8.18253	1.126	2.685	1.203	1.123	1.351	0.314242	1.72902e-06	0.228489	0.496863	0.0253261	1	1	1	1	1	Oo
18032	7.69083	7.32431	7.11799	6.89929	7.27275	-1.289	-1.154	-1.164	1.295	1.113	0.0428663	0.361581	0.358879	0.117459	0.454467	1	1	1	1	1	Oo
18033	6.47531	6.56204	6.5435	6.54617	6.48614	1.062	-1.013	1.002	-1.042	-1.041	0.545005	0.934566	0.990654	0.79444	0.743597	1	0	0	0	1	Oo
18035	8.72011	8.93194	8.83861	8.15716	8.28726	0.766	-0.6714	-1.6476	0.6976	-1.1206	0.0400442	0.662977	0.192069	0.421415	0.108432	1	1	1	1	0.8	Oo
18036	6.35215	6.88943	7.43157	7.33155	7.33395	1.451	1.456	-1.072	1.002	-1.07	0.0599947	0.114822	0.818475	0.995452	0.782089	0	0	1	0	1	Oo
18037	1.81479	5.96445	8.15065	7.72799	7.1762	17.749	4.551	-1.34	-1.466	-1.965	2.17173e-10	1.93389e-05	0.326673	0.254456	0.0100511	0	0	1	1	1	Oo
18038	4.6805	4.15894	4.34174	2.72323	2.27519	-1.436	1.135	-3.071	-1.364	-4.189	0.414633	0.846111	0.0446033	0.643149	0.00597997	0	1	0	0	0	Oo
18041	9.47572	8.49443	8.78722	8.9553	9.17635	-1.974	1.225	1.124	1.166	1.31	1.10531e-06	0.0926628	0.382384	0.255102	0.0179698	1	1	1	1	1	Oo
18044	5.5149	8.16983	8.50942	8.7567	8.91125	6.5815	1.2695	1.1875	1.1165	1.3285	5.66917e-10	0.234457	0.398327	0.601101	0.205325	0.5	0.5	0.5	1	1	Oo
18045	5.74899	6.24837	5.85952	4.14893	4.82294	1.414	-0.421	-5.7465	0.9605	-2.2905	0.259139	0.277276	0.45548	0.144056	0.0619402	0.5	1	0.5	0.5	0.5	Oo
18046	10.2376	10.5194	10.787	10.8282	10.6567	1.216	1.204	1.029	-1.126	-1.094	0.015276	0.0506298	0.812013	0.259367	0.30663	1	1	1	1	1	Oo
18054	5.94421	5.82729	5.75382	6.16878	5.82216	-1.084	-1.052	1.333	-1.272	1.049	0.512516	0.768191	0.0635147	0.142616	0.754925	1	1	1	1	1	Oo
18080	7.76229	9.85545	9.9384	10.0738	10.1819	4.363	0.07	1.0985	1.078	1.184	8.47292e-09	0.255846	0.615128	0.718415	0.264165	1	0.5	1	1	1	Oo
18081	9.00014	9.86757	10.0488	9.88912	9.72886	1.851	1.13775	-0.63	-1.12	-1.261	0.0013666	0.560655	0.575394	0.589052	0.316583	1	0.25	0.75	1	1	Oo
18082	8.96029	8.01963	7.96005	8.25682	8.04116	-1.993	-0.046	1.2295	-1.1665	0.0645	0.000468289	0.511514	0.191221	0.445565	0.344623	1	1	1	1	1	Oo
18087	7.4306	5.9977	5.71888	5.28796	5.33072	-3.1685	-1.22	-0.42	0.0345	-0.437	0.00637093	0.496234	0.665631	0.632097	0.218152	0.5	1	0	0.5	0.5	Oo
18099	7.2142	7.14412	7.12726	7.4208	7.24661	-0.0535	-0.013	1.2315	-1.1285	0.092	0.447772	0.567413	0.270325	0.47317	0.527563	0.5	0.5	1	1	1	Oo
18100	7.1122	6.94013	7.68291	7.94077	7.71267	-1.127	1.673	1.196	-1.171	1.021	0.231869	0.000301804	0.165357	0.243508	0.872571	0	1	1	1	1	Oo
18102	9.69342	6.87328	5.84253	5.88609	5.78203	-7.0675	-2.1165	1.0315	-0.094	-0.053	3.88115e-08	0.0232766	0.913477	0.370861	0.325921	1	0.5	0	0	0.5	Oo
18103	9.77871	8.14213	6.56751	6.45873	7.17587	-3.109	-2.979	-1.078	1.644	1.525	3.92729e-08	1.44859e-06	0.692352	0.00745049	0.00540459	1	1	1	1	1	Oo
18107	6.91165	5.7555	6.22047	6.3215	6.18927	-2.229	1.38	1.073	-1.096	-1.022	4.17164e-07	0.0172544	0.661478	0.569338	0.877079	0	1	1	1	1	Oo
18108	10.5927	9.47018	8.95508	8.19332	8.20454	-2.062	-1.429	-1.91	0.0085	-0.978	0.176739	0.00912008	0.433276	0.628065	0.310689	1	1	0.5	0	0.5	OoCc
18114	8.57474	7.78343	7.47795	7.40221	7.84845	-1.731	-1.236	-1.054	1.362	1.293	7.71976e-07	0.0277164	0.644835	0.00638489	0.00531293	1	1	1	1	1	Oo
18115	4.92941	5.03171	4.85165	4.91688	4.83193	1.073	-1.133	1.046	-1.061	-1.014	0.630615	0.509596	0.840517	0.803651	0.941806	0	0	0	0	1	OoCc
18117	7.40928	9.39179	9.74842	9.81691	9.43716	3.952	1.28	1.049	-1.301	-1.241	1.03681e-10	0.0454287	0.757348	0.0549237	0.056986	1	1	1	1	1	Oo
18120	7.15297	6.22779	6.4888	6.27479	6.04047	-1.899	1.198	-1.16	-1.176	-1.364	5.9327e-08	0.0483951	0.119068	0.105393	0.000895813	1	1	1	1	1	Oo
18125	12.2369	10.5397	9.84628	9.89625	9.91415	-3.243	-1.617	1.035	1.012	1.048	2.87198e-09	0.00123344	0.853921	0.964651	0.750364	1	1	1	1	1	Oo
18127	5.32561	5.95597	6.32261	6.19548	6.29277	1.548	1.289	-1.092	1.07	-1.021	0.00470084	0.149604	0.681197	0.769856	0.913875	1	1	1	1	1	OoCcMur
18129	7.7747	6.70171	7.22083	6.78649	6.99499	-2.104	1.433	-1.351	1.155	-1.169	1.14675e-05	0.0266707	0.0699066	0.43798	0.294055	1	1	1	1	1	Oo
18130	8.88368	8.61858	8.5933	8.47509	8.4557	-0.649667	-0.312667	0.233667	-0.349667	0.183667	0.00254945	0.0242713	0.600884	0.47148	0.270006	1	0.666667	1	1	0.666667	Oo
18139	7.65264	7.00874	7.19595	7.40932	7.44257	-1.608	0.15	1.1605	0.026	1.1895	0.0354708	0.524683	0.401693	0.527363	0.291217	0.5	1	1	1	1	OoMur
18140	9.01902	10.5456	10.2291	9.88526	9.49417	3.2795	-1.269	-1.27	-0.4705	-0.944	0.000196364	0.463536	0.178025	0.0647992	0.344646	1	1	1	1	1	OoMur
18141	7.13901	7.64291	7.7113	7.99865	7.92228	0.972333	0.383333	0.591667	0.255667	0.504333	0.00335729	0.644681	0.426185	0.3628	0.451038	1	0.666667	1	1	1	Oo
18143	5.13826	5.3715	5.65096	6.03683	6.1849	1.175	1.214	1.307	1.108	1.448	0.342763	0.372228	0.228888	0.696644	0.0543762	0	0	1	1	1	Oo
18145	5.87589	7.98101	7.54532	7.6052	7.9697	4.302	-1.353	1.042	1.287	1.342	1.03023e-11	0.00865899	0.764162	0.0413033	0.00583595	1	1	1	1	1	Oo
18146	5.30986	5.96512	6.49206	5.8007	6.06296	1.575	1.441	-1.615	1.199	-1.346	0.000238078	0.00716705	0.000965091	0.204058	0.0150244	0	0	1	0	1	Oo
18148	10.9787	10.7435	10.7206	10.4851	10.5888	-0.1955	-0.019	-1.181	0.0845	-0.116	0.441422	0.168239	0.292728	0.286079	0.107477	1	1	1	1	1	Oo
18163	6.37587	6.26828	5.84225	6.09289	6.18512	-0.1245	-1.355	1.19	0.0705	1.2765	0.0567111	0.415133	0.64721	0.841086	0.465797	1	1	1	0	0.5	Oo
18164	6.07625	6.2676	6.49667	6.34116	5.98606	1.142	1.172	-1.114	-1.279	-1.425	0.449502	0.483657	0.676931	0.306514	0.0711115	1	1	1	1	1	Oo
18171	4.98568	5.03659	5.42205	5.1799	5.25124	1.036	1.306	-1.183	1.051	-1.126	0.851574	0.225557	0.503246	0.870306	0.5782	1	0	1	1	1	OoCcMur
18173	5.82995	4.96248	5.11176	5.46433	5.69353	-1.824	1.109	1.277	1.172	1.497	0.00777387	0.730648	0.399913	0.621197	0.0938816	0	1	0	0	1	OoCc
18174	7.30616	8.24471	8.29334	7.7564	7.53877	2.139	0.039	-1.5045	-1.1655	-1.724	0.107057	0.335041	0.233629	0.396953	0.0038552	1	1	1	1	0.5	Oo
18175	6.44901	6.88691	7.72666	7.8426	7.57595	1.355	1.79	1.084	-1.203	-1.11	0.00177677	2.63813e-05	0.517784	0.119177	0.299905	1	1	1	1	1	Oo
18176	7.01933	7.60788	7.35962	7.22241	7.18552	1.07067	-1.19433	-0.443667	-0.359667	-0.479667	6.3996e-07	0.309969	0.0348443	0.846132	0.0203945	1	1	0.666667	0.666667	1	Oo
18181	8.22856	8.49839	8.77825	8.81537	8.47508	1.242	0.591	0.360333	-1.266	-1.23533	0.600282	0.160662	0.719369	0.154064	0.134639	1	1	1	1	1	OoMur
18186	3.76531	5.62353	6.37311	7.03446	7.24392	3.94367	1.72333	1.58567	1.169	1.848	7.23982e-06	0.180797	0.0634093	0.663831	0.00556848	0.666667	0.333333	0.666667	1	1	Oo
18187	6.34789	5.93313	5.71311	5.82476	5.84238	-1.333	-1.165	1.08	1.012	1.094	0.105098	0.511214	0.774163	0.968892	0.677031	1	1	1	1	1	Oo
18193	9.23059	8.97439	8.88882	8.89722	9.18186	-0.4265	-1.0615	0.01	0.2555	0.4565	9.77108e-05	0.761295	0.00334613	0.430336	5.81403e-05	1	0.5	1	0.5	0.5	Oo
18194	7.77916	7.98402	7.90156	7.91469	7.75483	1.1525	-0.0695	1.009	-1.118	-1.108	0.285067	0.331354	0.971815	0.50086	0.461798	0.5	1	1	0.5	0.5	OoCc
18195	9.23892	10.0392	9.8276	9.74447	9.61455	1.9105	-1.1625	-0.0635	-0.099	-1.159	0.286893	0.448454	0.569344	0.77163	0.365886	1	1	1	1	1	OoMur
18198	6.12231	5.78074	6.1986	7.28684	7.86834	-1.267	1.336	2.126	1.496	3.182	0.300246	0.314333	0.0104812	0.192477	0.000147314	0	0	0	1	1	Oo
18203	5.59306	5.80837	5.92435	5.9636	5.90399	1.161	1.084	1.028	-1.042	-1.014	0.259225	0.656727	0.898175	0.855691	0.933969	1	0	1	1	1	Oo
18207	6.15764	7.08039	7.02186	6.91207	6.63452	1.896	-1.041	-1.079	-1.212	-1.308	0.000131602	0.845727	0.718568	0.323229	0.0896269	1	1	1	1	1	Oo
18212	6.42666	6.60156	6.7852	6.6928	6.73199	1.129	1.136	-1.066	1.028	-1.038	0.534498	0.625586	0.83004	0.934489	0.882774	1	1	1	1	1	Oo
18214	6.36292	6.33037	5.98728	6.29084	6.29138	-1.023	-1.269	1.2345	0.0005	0.263	0.911822	0.378797	0.457316	0.538738	0.585459	0.5	0.5	0.5	0.5	1	Oo
18220	7.57857	7.24022	7.80542	7.87115	7.7626	-1.264	1.48	1.047	-1.078	-1.03	0.236061	0.105132	0.885911	0.817916	0.909979	1	0	1	0	1	Oo
18221	9.03484	10.3903	10.769	10.9606	11.0196	2.591	1.3015	1.1445	0.043	1.1975	6.48563e-09	0.0204165	0.336987	0.685882	0.306263	1	1	1	1	1	Oo
18222	8.59285	8.98119	8.64297	8.17939	8.34686	1.309	-1.264	-1.379	1.123	-1.228	0.00979853	0.053579	0.0116794	0.407031	0.0659891	1	1	1	1	1	Oo
18226	9.39574	9.08225	9.46225	9.67604	9.8396	-0.8952	1.309	1.1684	0.7246	0.9252	0.15711	0.166553	0.388065	0.31384	0.14979	0.8	0.6	1	1	1	Oo
18227	7.42472	5.99487	5.74802	5.33884	5.83632	-3.184	-1.1915	-1.3295	1.4275	0.074	0.0390575	0.648354	0.403438	0.390478	0.540148	0.5	1	0.5	0.5	0.5	OoCc
18230	6.89673	6.65452	6.4704	6.57683	6.65921	-1.184	-1.136	1.0785	0.061	1.14	0.116865	0.325704	0.573029	0.762697	0.268369	1	1	0.5	0.5	0.5	Oo
18241	8.12241	4.9406	5.55505	5.39475	5.29311	-9.074	1.531	-1.118	-1.073	-1.199	7.08476e-09	0.109929	0.737527	0.851151	0.47739	0	1	0	0	0	Oo
18242	8.75875	8.99124	8.95059	8.50524	8.38627	1.175	-1.029	-1.362	-1.086	-1.479	0.0421124	0.802745	0.00285101	0.460113	0.000156255	1	1	1	1	1	Oo
18245	11.7493	11.7178	11.6761	11.7261	11.6795	-1.022	-1.029	1.035	-1.033	1.002	0.744932	0.752699	0.724512	0.75535	0.97793	1	1	1	1	1	Oo
18247	7.88603	8.59984	8.28507	8.13921	7.96072	1.663	-1.2445	-1.111	-1.132	-1.256	0.00352826	0.111067	0.507286	0.346734	0.134393	1	0.5	1	1	0.5	Oo
18260	5.8744	6.13449	5.8964	5.44065	4.36652	1.198	-1.179	-1.371	-2.105	-2.888	0.27757	0.442123	0.138799	0.0030976	1.22013e-05	1	1	1	1	0	Oo
18263	9.92729	9.79829	9.76246	9.84174	10.0328	-0.1315	-0.0255	1.057	1.1465	1.216	0.000358066	0.767779	0.72119	0.439564	0.251594	1	1	1	1	1	Oo
18286	6.84626	6.34933	6.36031	6.58924	6.46126	-1.26375	-0.4535	0.681	0.328	0.0855	0.317169	0.424748	0.575795	0.598226	0.374848	0.25	0.75	0.5	0.5	0.5	Oo
18291	9.87028	10.292	10.5488	10.4013	10.6606	1.339	1.195	-1.108	1.197	1.081	0.0100311	0.17831	0.499805	0.220399	0.544233	1	1	1	1	1	Oo
18292	6.99127	7.6851	8.16939	8.58312	8.99371	1.665	1.403	1.3325	1.334	1.774	0.0140896	0.142013	0.132437	0.248087	0.0107543	0.5	0.5	0.5	0.5	1	Oo
18293	6.85626	6.88824	6.01947	5.44974	6.63267	1.022	-1.826	-1.484	2.27	1.53	0.935349	0.0534947	0.234211	0.0213754	0.138192	1	0	1	0	1	Oo
18365	5.14112	5.50837	5.497	5.78291	5.50348	1.29	-1.008	1.219	-1.214	1.004	0.115989	0.976945	0.361314	0.395299	0.98275	1	0	0	0	1	Oo
18379	5.21199	8.77913	8.92287	9.16223	9.46572	11.853	1.105	1.18	1.234	1.457	9.92549e-13	0.566199	0.338535	0.231474	0.0125777	1	1	1	1	1	Oo
18386	5.02812	7.71682	7.17374	6.91673	6.75347	6.447	-1.457	-1.195	-1.12	-1.338	1.16594e-09	0.0577594	0.423129	0.646231	0.1106	1	0	0	0	1	Oo
18392	7.14917	7.55325	8.3666	8.27482	7.97751	1.323	1.757	-1.066	-1.229	-1.31	0.00959698	0.000170449	0.676988	0.135137	0.0221305	1	1	1	1	1	OoCc
18393	7.07836	6.73691	6.81663	7.02305	6.87977	-0.256	0.396333	1.15633	0.203667	0.375	0.292205	0.553598	0.388535	0.545449	0.0729685	1	1	1	1	1	Oo
18406	4.22627	3.76025	3.1161	1.18157	3.22668	-1.381	-1.563	-3.823	4.127	1.08	0.205748	0.152077	0.000251092	0.0005737	0.814125	0	1	0	0	0	Oo
18408	7.70418	8.26235	8.40877	8.3345	8.23176	1.55	1.107	-0.063	-0.0765	-0.161	0.213008	0.530936	0.322736	0.590226	0.27515	1	0.5	0.5	0.5	1	Oo
18412	7.43406	7.4541	7.3115	6.96262	7.01519	1.014	-1.104	-1.274	1.037	-1.228	0.882975	0.380469	0.0304615	0.801331	0.040258	1	1	1	1	1	Oo
18414	4.12208	4.77866	4.62808	5.81146	5.93436	1.576	-1.11	2.271	1.089	2.473	0.033812	0.722935	0.00315996	0.804372	0.000650854	0	0	0	0	1	Oo
18415	7.69344	8.18539	7.62926	7.55089	7.60411	0.65875	-1.5185	-0.55925	0.04025	-0.02775	0.195255	0.246604	0.631297	0.514294	0.219689	1	0.75	0.75	0.5	0.75	OoCcMur
18416	4.93934	4.26887	4.09657	3.71242	4.03358	-1.592	-1.127	-1.305	1.249	-1.045	0.0907461	0.756003	0.483462	0.585769	0.903288	0	1	0	0	0	Oo
18426	6.57328	6.34877	6.04322	5.54974	5.51187	-1.168	-1.236	-1.408	-1.027	-1.445	0.290883	0.246425	0.0678854	0.916938	0.0286034	1	1	1	0	1	Oo
18429	8.18882	7.9664	7.91497	8.08033	8.11378	-1.167	-1.036	1.121	1.023	1.148	0.158618	0.82419	0.447561	0.901487	0.267408	0	1	0	0	1	Oo
18431	5.54854	5.75447	6.19415	7.39149	7.26083	1.153	1.356	2.293	-1.095	2.095	0.22692	0.0363854	1.23216e-05	0.609978	1.51277e-05	1	1	1	1	1	Oo
18432	7.46944	6.83922	6.83535	6.8648	6.96952	-1.548	-1.003	1.021	1.075	1.097	0.00730957	0.991539	0.937413	0.767712	0.61618	1	0	1	1	1	Oo
18438	6.72246	6.11756	6.29843	6.38803	6.20603	-1.521	1.134	1.064	-1.134	-1.066	0.00737208	0.519269	0.78305	0.566452	0.725368	1	1	1	1	1	Oo
18451	5.2416	8.16294	8.30828	8.80243	8.42693	7.576	1.106	1.408	-1.297	1.086	1.72083e-11	0.561313	0.0370485	0.134709	0.597972	1	0	1	1	1	Oo
18453	10.606	11.2815	10.8915	10.7796	10.8567	1.597	-1.31	-1.081	1.055	-1.024	8.33813e-07	0.00233868	0.389733	0.593495	0.770311	1	1	1	1	1	Oo
18457	7.64753	6.18766	5.88472	5.41337	4.95456	-3.1255	-0.2825	-1.458	-1.396	-1.9245	0.00622467	0.383962	0.490712	0.199293	0.0103588	0.5	1	0.5	0.5	0	OoMur
18458	10.7517	8.639	8.59196	8.30472	7.87145	-4.325	-1.033	-1.22	-1.35	-1.648	1.69027e-09	0.86816	0.244115	0.0895389	0.0018716	1	1	1	1	1	Oo
18472	8.62951	8.67631	7.97808	8.2144	8.62045	-0.257667	-1.63033	1.186	1.335	1.607	0.0404299	0.00127617	0.363473	0.100009	0.029326	1	1	1	0.666667	1	Oo
18475	7.07842	6.13512	5.72841	5.35753	5.1926	-1.923	-1.326	-1.293	-1.121	-1.45	0.00180201	0.231164	0.307881	0.699015	0.0834886	0	1	0	0	0	OoCc
18476	8.42238	8.43534	8.09212	7.65966	7.2677	1.009	-1.269	-1.35	-1.312	-1.771	0.947844	0.131958	0.0680131	0.117869	0.00053384	1	0	1	1	1	Oo
18477	10.7944	10.6617	10.4057	10.3959	10.4626	-0.3548	-0.818	-0.208	-0.1206	0.2408	0.19778	0.494483	0.442403	0.170458	0.378806	1	1	1	1	1	Oo
18479	7.94176	9.02092	9.07918	9.41926	9.64087	2.133	0.376	1.26633	1.16867	1.484	1.3612e-07	0.583455	0.0389009	0.265033	0.00452868	1	1	1	1	1	Oo
18484	5.91135	5.90207	5.20335	5.3757	5.39909	-1.006	-1.623	1.127	1.016	1.145	0.968135	0.0117072	0.583511	0.9495	0.442305	0	1	0	0	0	OoMur
18508	2.88463	5.22386	5.26816	4.75127	4.52752	5.06	1.031	-1.431	-1.168	-1.671	1.40997e-06	0.936016	0.255342	0.675565	0.0583216	1	0	1	0	0	Oo
18510	6.04073	5.86217	5.80574	5.8575	5.8734	-1.132	-1.04	1.037	1.011	1.048	0.196785	0.773336	0.808889	0.946266	0.687828	0	1	0	0	0	Oo
18515	5.99019	7.63122	7.50899	7.33274	7.81902	3.119	-1.088	-1.13	1.401	1.24	1.06836e-09	0.511528	0.354539	0.0155358	0.053065	1	1	1	1	1	OoCc
18516	8.79081	7.71391	7.47085	7.24516	7.34471	-2.11	-1.183	-1.169	1.071	-1.091	0.000822618	0.550988	0.58863	0.866694	0.742725	1	1	1	1	1	Oo
18518	7.70372	7.19917	7.43897	7.70453	7.83745	-1.43533	0.550333	1.20367	0.435667	1.33833	0.165259	0.0983326	0.401477	0.528222	0.335499	1	0.666667	1	1	1	OoMur
18519	6.71367	7.00698	6.81328	6.65053	6.53535	1.225	-1.144	-1.119	-1.083	-1.212	0.254479	0.604688	0.677594	0.819054	0.362995	1	1	1	1	1	Oo
18521	9.60122	9.04668	8.54715	8.76766	9.13367	-1.554	-1.4195	1.167	1.3135	1.5175	0.391565	0.0777993	0.46083	0.417462	0.0473338	1	1	0.5	0.5	1	Oo
18536	6.77978	5.82913	5.74445	6.07505	6.13001	-2.53375	-0.0815	0.77925	0.54075	1.33625	0.206909	0.548697	0.437749	0.408031	0.373475	0.5	1	0.5	0.5	1	Oo
18537	7.53185	7.60642	7.72137	7.9387	7.75221	-0.21025	0.094	1.1645	-0.153	0.02775	0.0753429	0.386225	0.392785	0.44292	0.153001	0.75	1	0.75	1	1	Oo
18538	9.90981	10.5125	10.6877	10.5919	10.6964	1.519	1.129	-1.069	1.075	1.006	0.000180233	0.305721	0.630148	0.610094	0.962144	1	1	1	1	1	Oo
18541	8.88016	10.5168	10.5561	10.5375	10.9043	3.2035	0.029	-0.013	1.2895	1.2735	3.94229e-05	0.834398	0.951666	0.38552	0.273537	1	0	1	1	1	Oo
18550	7.55909	8.37641	8.21677	8.28119	8.56404	1.762	-1.117	1.046	1.217	1.272	6.37323e-05	0.46246	0.803098	0.213036	0.0656656	1	1	1	1	1	Oo
18553	6.89285	6.36143	6.17771	6.19943	6.82203	-1.445	-1.136	1.015	1.54	1.563	0.0218648	0.536503	0.954898	0.0432222	0.013313	0	0	0	0	1	Oo
18555	10.5644	10.8818	10.8364	10.9771	10.8503	1.246	-1.032	1.102	-1.092	1.01	0.055115	0.850985	0.544496	0.605887	0.94823	1	1	1	1	1	Oo
18559	6.07908	4.86788	3.90843	3.23961	3.13653	-2.315	-1.945	-1.59	-1.074	-1.708	0.140374	0.358068	0.568291	0.940457	0.416698	0	1	0	0	0	Oo
18563	7.48454	7.07107	6.89828	6.46864	6.50815	-1.332	-1.127	-1.347	1.028	-1.311	0.0361663	0.493443	0.0796453	0.904997	0.0727166	1	0	1	0	1	OoCc
18567	8.31247	8.09045	8.28053	8.27975	8.13804	-1.166	1.141	-1.001	-1.103	-1.104	0.04491	0.15209	0.997089	0.347623	0.247548	1	1	1	1	1	Oo
18569	9.81701	8.97856	8.86554	8.8104	8.81713	-1.788	-1.081	-1.039	1.005	-1.034	4.09418e-05	0.611462	0.829108	0.981259	0.816838	1	1	1	1	1	Oo
18570	8.87991	9.59844	9.64455	9.07043	9.07126	1.646	1.032	-1.489	1.001	-1.488	2.921e-06	0.773336	0.000340912	0.99618	0.00014221	1	1	1	1	1	Oo
18571	7.51172	7.52377	7.07816	7.37889	7.55359	-0.242667	-1.38633	1.23533	0.472	1.397	0.0157328	0.206368	0.356336	0.404251	0.0786381	1	1	1	1	1	OoCc
18572	8.98601	9.03052	8.86653	8.51817	8.70363	1.031	-1.12	-1.273	1.137	-1.12	0.850912	0.621514	0.238627	0.632348	0.567816	1	1	1	1	1	Oo
18573	4.443	5.07876	5.46766	5.62317	5.641	1.554	1.309	1.114	1.012	1.128	0.00679074	0.150256	0.630148	0.963299	0.504586	1	1	1	1	1	Oo
18574	6.43522	6.4602	7.24128	6.99181	7.29572	1.017	1.718	-1.189	1.234	1.038	0.915024	0.00537264	0.394768	0.309691	0.84401	1	1	1	1	1	Oo
18575	7.39923	6.91854	7.39725	6.76887	6.4402	-1.395	1.393	-1.546	-1.256	-1.941	0.143939	0.261861	0.13182	0.54442	0.0125428	0	1	1	0	0	Oo
18576	10.6213	10.1889	10.0831	10.3527	10.5369	-1.349	-1.076	1.205	1.136	1.37	0.0191978	0.692776	0.25078	0.532513	0.0278793	1	1	1	1	1	Oo
18577	4.86866	5.17072	5.50056	5.17621	5.57644	1.233	1.257	-1.252	1.32	1.054	0.187415	0.244763	0.282069	0.196202	0.792486	0	0	0	0	1	Oo
18578	5.9548	5.75662	5.79272	5.85477	5.88385	-0.1705	0.0265	1.045	0.0235	0.077	0.407377	0.835186	0.874505	0.639951	0.444222	0.5	0.5	0	0	0	Oo
18582	7.051	7.94605	9.19925	9.46302	9.3975	1.86	2.384	1.201	-1.046	1.147	3.23736e-05	9.06934e-06	0.240612	0.817678	0.314921	1	0	1	1	1	Oo
18583	8.50184	6.99818	6.37286	5.04509	5.51834	-2.836	-0.7705	-3.4625	0.568	-1.2105	0.00373894	0.429506	0.264281	0.397123	0.440349	0.5	1	0	0	0	Oo
18584	7.44542	9.02997	8.66092	8.75131	8.9076	2.999	-1.292	1.065	1.114	1.186	6.25747e-08	0.102067	0.749044	0.571214	0.238884	1	1	1	1	1	Oo
18587	1.6582	4.99961	6.19641	6.61396	6.87447	10.136	2.292	1.336	1.198	1.6	7.16264e-13	1.36664e-05	0.0541343	0.264678	0.00136463	0	0	0	0	1	Oo
18590	6.78937	6.1438	6.02814	5.24117	5.14364	-1.5905	-0.09	-1.727	-0.0725	-1.8465	0.0361632	0.68317	0.0174407	0.749908	0.00844861	0.5	1	0.5	0	0	OoCc
18591	5.80627	6.81697	7.19609	6.74604	6.44507	2.015	1.301	-1.366	-1.232	-1.683	3.79884e-05	0.115268	0.0725946	0.26393	0.00191732	1	0	1	1	0	OoMur
18597	7.87864	8.22112	8.09966	7.89404	7.97219	1.2855	-1.089	-1.159	0.0585	-0.106	0.207903	0.544627	0.407077	0.609289	0.234752	0.5	1	0.5	0.5	0.5	OoCc
18600	6.52077	6.51414	5.90705	5.62409	5.7449	-1.005	-1.523	-1.217	1.087	-1.119	0.978557	0.0325961	0.360166	0.739406	0.551647	1	0	0	0	0	Oo
18606	3.73286	5.35549	6.93271	7.15133	7.01561	3.086	3.092	1.164	-1.0995	1.0595	8.5102e-05	0.00322913	0.658891	0.80125	0.845423	0	0	0	0	1	Oo
18607	8.50273	8.87904	8.94594	8.8595	8.62885	1.298	1.047	-1.062	-1.173	-1.246	0.0482983	0.805878	0.763542	0.380246	0.132985	1	1	1	1	1	Oo
18609	5.15993	6.66257	7.06842	7.41851	7.81298	2.834	1.325	1.275	1.314	1.675	1.00323e-06	0.124983	0.214924	0.177874	0.00414199	0	0	1	1	1	Oo
18611	5.6661	5.08683	5.30696	5.27703	5.32493	-1.494	1.165	-1.021	1.034	1.013	0.0973659	0.641481	0.959822	0.935951	0.968385	0	0	0	0	1	Oo
18616	8.83443	8.11204	7.45581	7.55925	6.90345	-1.6895	-1.5855	0.085	-1.582	-1.5185	0.0125886	0.0122426	0.328578	0.0137187	0.188279	1	1	0.5	1	0.5	Oo
18617	6.32565	5.19473	4.30712	4.93935	4.95469	-2.19	-1.85	1.55	1.011	1.567	0.00229573	0.03423	0.148098	0.979317	0.0908073	0	1	0	0	0	OoCcMur
18628	8.25895	7.88951	8.20027	8.43251	8.66088	-1.292	1.24	1.175	1.172	1.376	0.0712644	0.213641	0.398814	0.428496	0.045027	1	1	1	1	1	Oo
18630	6.01372	4.84921	4.77138	4.7108	5.20761	-2.242	-1.055	-1.043	1.411	1.353	1.29996e-07	0.696269	0.782146	0.0148338	0.00944507	0	1	0	0	1	Oo
18631	6.61979	7.29368	7.16711	7.58576	7.60885	0.794	-0.1095	1.345	0.0195	1.422	0.385212	0.153223	0.0745237	0.208023	0.49762	1	0.5	1	1	1	Oo
18632	6.46295	6.60122	6.70338	6.88153	6.74641	1.1015	1.0755	1.133	-0.106	0.0355	0.440152	0.711212	0.453747	0.559903	0.230079	0.5	0.5	0	0	0.5	Oo
18633	7.01531	5.96067	6.47568	6.46043	6.77836	-2.077	1.429	-1.011	1.247	1.233	2.30363e-05	0.0341012	0.963415	0.234211	0.173391	1	1	1	1	1	Oo
18634	8.69948	9.442	9.49732	9.38425	8.77935	1.673	1.039	-1.082	-1.521	-1.645	2.27218e-06	0.730921	0.476407	0.000862829	1.46005e-05	1	1	1	1	1	Oo
18637	8.3271	9.5097	8.9564	8.49967	7.66081	2.27	-1.467	-1.372	-1.789	-2.455	1.19912e-06	0.0116133	0.0372468	0.00182116	1.8943e-06	1	1	1	1	1	Oo
18639	7.35437	7.29478	7.04431	6.86567	6.7949	-1.042	-1.19	-1.132	-1.05	-1.189	0.684365	0.150599	0.349849	0.755236	0.120521	1	0	1	0	0	Oo
18640	6.75003	6.3915	6.36392	6.49553	6.47847	-1.2835	-1.0195	1.097	-1.012	1.084	0.136786	0.922032	0.642212	0.971691	0.631627	0.5	0	0	0.5	1	Oo
18641	6.42687	6.96719	7.28521	6.94174	7.19727	0.923667	1.27933	-1.308	1.20367	-0.402333	0.132026	0.48711	0.423844	0.439977	0.671703	1	0.666667	1	1	1	Oo
18642	7.68346	8.13073	8.18965	8.25558	7.97959	1.363	1.042	1.047	-1.211	-1.157	0.00521716	0.783649	0.77352	0.172144	0.214777	1	1	1	1	1	Oo
18643	6.36047	8.40487	7.50817	6.85462	6.81198	4.125	-1.862	-1.573	-1.03	-1.62	9.51781e-09	0.00142153	0.013777	0.904306	0.00476875	1	1	1	1	1	Oo
18645	9.84771	8.50805	8.21388	8.08936	8.40109	-2.56933	-1.22867	-0.427333	1.26433	0.487333	1.3105e-07	0.191084	0.448997	0.402694	0.307741	1	1	1	1	1	Oo
18646	4.92046	5.2996	5.25053	5.66237	5.37553	1.301	-1.035	1.33	-1.22	1.091	0.144065	0.902052	0.222685	0.43668	0.69196	0	0	0	0	1	Oo
18647	4.79733	4.44877	4.50815	5.88987	5.5945	-1.273	1.042	2.606	-1.227	2.123	0.35348	0.920238	0.00496562	0.600794	0.0126841	0	1	0	0	0	Oo
18648	7.2025	5.81976	6.24388	5.94056	6.01182	-2.608	1.342	-1.234	1.051	-1.175	1.30225e-05	0.158515	0.358213	0.866146	0.415875	0	1	0	0	0	Oo
18655	9.91805	8.74824	8.2975	8.3058	8.12361	-2.35833	-1.401	-0.327	-0.481	-0.476	0.000427443	0.231876	0.823128	0.186627	0.166129	1	1	1	1	1	Oo
18669	4.66818	7.81541	8.26896	8.91202	8.78832	8.86	1.369	1.562	-1.09	1.433	4.42031e-09	0.222145	0.0931327	0.802645	0.126188	1	0	1	1	1	OoCc
18670	6.62388	8.05486	8.526	9.46548	9.2191	2.696	1.386	1.918	-1.186	1.617	2.32032e-08	0.0154618	6.03188e-05	0.241682	0.000478004	1	1	1	1	1	OoCc
18671	6.42038	6.01458	5.62521	5.53206	5.29706	-0.4145	-1.3135	-0.0705	-0.2035	-0.3095	0.140278	0.115354	0.749575	0.428224	0.246489	1	1	1	1	1	OoCc
18673	8.26923	7.70233	7.97131	8.14561	8.05455	-1.4815	1.2175	1.1285	-0.078	0.071	0.00737545	0.434408	0.518126	0.290378	0.197389	1	0	1	1	1	Oo
18674	11.1083	10.3288	10.1137	9.93719	9.44161	-1.716	-1.161	-1.13	-1.41	-1.593	1.18798e-06	0.121917	0.235174	0.00380849	2.99135e-05	1	1	1	1	1	OoMur
18676	6.71886	7.40251	7.38547	7.20167	7.64426	1.606	-1.012	-1.136	1.359	1.196	0.0011548	0.955581	0.484633	0.0836298	0.226116	1	1	1	1	1	Oo
18679	6.53837	6.37233	6.15494	5.26092	5.18759	-1.122	-1.163	-1.858	-1.052	-1.955	0.349204	0.33213	0.000361383	0.801211	6.76069e-05	0	1	0	0	0	Oo
18685	5.9364	6.62646	6.75049	6.74993	7.06161	1.613	1.09	1	1.241	1.241	1.29276e-05	0.433663	0.997896	0.0620149	0.0264572	1	1	1	1	1	OoCc
18686	6.34299	5.37455	5.58923	5.61502	5.74592	-1.957	1.16	1.018	1.095	1.115	3.13654e-05	0.365025	0.934235	0.64345	0.471042	0	1	0	0	0	Oo
18693	5.99991	6.33026	5.86744	5.66547	6.01925	1.257	-1.378	-1.15	1.278	1.111	0.213864	0.153739	0.597373	0.337557	0.635859	1	1	1	0	0	Oo
18700	7.20737	7.45844	7.53313	7.88191	8.34354	1.19	1.053	1.273	1.377	1.754	0.0929696	0.720581	0.0644646	0.025862	6.84068e-05	1	1	1	1	1	Oo
18701	10.2252	10.826	10.8167	10.8869	10.5956	1.517	-1.006	1.05	-1.224	-1.166	6.87979e-06	0.954727	0.635852	0.037032	0.0532633	1	1	1	1	1	Oo
18704	7.57932	6.82732	6.50021	7.20101	7.20055	-1.69	-1.2545	1.641	0	1.652	0.00663508	0.247804	0.018573	0.829118	0.00834208	0.5	1	0.5	0.5	0.5	Oo
18706	7.12084	7.19893	7.42262	7.67433	7.55395	0.5372	1.1726	0.411	-1.0896	0.3078	0.0663187	0.532188	0.434072	0.781964	0.407445	0.8	0.4	0.8	1	1	OoMur
18707	7.96628	9.03915	8.96629	8.77859	8.84613	2.59133	-0.386333	-1.139	0.384	-0.426667	0.0618376	0.820564	0.573157	0.597775	0.670119	1	0.333333	0.666667	0.666667	1	Oo
18708	8.25374	8.84458	8.59223	8.95577	8.93886	1.515	-1.192	1.291	-0.013	1.292	0.0113391	0.286985	0.176815	0.636994	0.361098	1	1	1	1	1	Oo
18710	10.6004	10.0724	10.0826	10.0398	10.3181	-1.442	1.007	-1.03	1.213	1.177	0.00104782	0.966829	0.860882	0.187941	0.156167	1	1	1	1	1	OoMur
18711	10.2652	9.9795	9.43471	8.72123	8.58415	-1.219	-1.459	-1.64	-1.1	-1.803	0.0807651	0.00889404	0.00107908	0.619781	9.23355e-05	1	1	1	1	1	Oo
18715	6.21154	5.94482	5.92617	6.20195	6.60339	-1.203	-1.013	1.211	1.321	1.599	0.184081	0.954398	0.297936	0.136197	0.00465208	1	1	1	1	1	Oo
18717	7.35762	7.63527	7.07122	7.064	7.64458	1.212	-1.478	-1.005	1.495	1.488	0.191472	0.0315856	0.983775	0.0458907	0.0189139	1	1	0	0	1	Oo
18718	7.68263	6.73484	6.85335	6.3791	5.82286	-1.9665	1.086	-1.392	-1.485	-2.086	0.000766063	0.693398	0.126222	0.108386	0.000923069	1	1	1	0.5	0.5	OoCcMur
18720	7.35269	7.75651	7.5458	7.17588	6.82637	1.323	-1.157	-1.292	-1.274	-1.647	0.00903077	0.246603	0.0467753	0.0787246	0.000202139	1	1	1	1	1	OoCc
18738	7.48486	7.40567	7.1888	7.07644	7.25833	-0.064	-1.1625	-1.082	1.1405	0.051	0.120593	0.103903	0.488887	0.430318	0.575192	1	1	1	1	1	Oo
18744	7.5911	7.34161	7.50084	7.3827	7.43377	-0.687	1.12267	-1.08633	-0.288333	-0.387	0.276821	0.566286	0.638402	0.473952	0.261949	1	1	1	1	1	Oo
18746	8.93758	9.72693	9.44077	9.36681	9.41359	1.728	-1.219	-1.053	1.033	-1.019	0.000180897	0.19228	0.786579	0.876979	0.90878	1	1	1	1	1	Oo
18747	8.72501	8.26807	8.00297	7.87328	8.00914	-1.4065	-1.206	-1.0945	0.104	0.005	0.25879	0.347326	0.641629	0.671413	0.438423	0.5	0.5	0.5	0.5	1	Oo
18749	7.36727	5.66888	5.13787	4.81723	5.05447	-3.727	-1.4465	-1.2555	0.2115	-0.0825	0.00858758	0.380637	0.495262	0.709898	0.372146	0.5	1	0	0	0	Oo
18751	1.60891	4.70635	4.25705	5.58585	5.8261	8.559	-1.365	2.512	1.181	2.967	0.00104062	0.703577	0.228965	0.868242	0.0994958	0	0	0	0	1	Oo
18753	7.59649	7.13296	7.19233	7.11311	6.98301	-1.3815	0.0445	-0.063	-1.096	-1.16	0.0395818	0.725105	0.512354	0.722155	0.449235	0.5	0.5	0.5	0.5	0.5	Oo
18754	6.17011	6.71478	6.76928	7.02154	6.78208	1.459	1.038	1.191	-1.181	1.009	0.0364232	0.900756	0.488029	0.574716	0.973414	0	0	0	1	0	Oo
18759	7.51421	8.79281	9.17976	8.71515	8.30106	2.426	1.308	-1.38	-1.332	-1.839	1.35719e-05	0.166098	0.110169	0.1789	0.00173458	1	1	1	1	1	Oo
18760	11.3637	10.6829	10.7101	10.6147	10.3564	-0.9265	0.0225	-1.069	-1.1975	-1.278	0.0223778	0.177758	0.684286	0.27862	0.0534953	1	1	1	1	1	Oo
18762	5.54669	2.36698	1.64692	2.09025	1.65813	-9.061	-1.647	1.36	-1.349	1.008	7.89003e-05	0.397985	0.650154	0.672377	0.990009	0	1	0	0	0	Oo
18763	5.83541	6.03464	5.26112	5.46046	5.42749	1.148	-1.709	1.148	-1.023	1.122	0.504845	0.0336553	0.645301	0.947445	0.640136	1	0	0	0	0	Oo
18764	8.41998	7.477	7.9011	7.44085	6.96293	-2.2235	1.354	-1.379	-1.4075	-1.922	0.244932	0.233617	0.145404	0.288444	0.00532024	0	1	1	0	0	Oo
18768	6.97793	6.76459	6.71693	5.12373	4.42599	-1.159	-1.034	-3.017	-1.622	-4.894	0.138368	0.820495	7.14768e-08	0.00180594	1.38809e-10	1	1	1	1	1	Oo
18769	8.77376	6.62585	6.19117	6.15525	6.84953	-4.432	-1.352	-1.025	1.618	1.578	3.14833e-08	0.134902	0.928236	0.034753	0.0165607	1	1	1	1	1	Oo
18770	5.40858	5.23753	5.18796	5.52496	5.03149	-1.126	-1.035	1.263	-1.408	-1.115	0.665267	0.935708	0.538299	0.358825	0.743597	0	1	1	1	1	Oo
18777	8.91284	7.43832	7.21385	7.16224	7.25839	-2.779	-1.168	-1.036	1.069	1.031	1.81151e-08	0.247699	0.830964	0.690806	0.822778	1	1	1	1	1	Oo
18779	5.16483	5.66023	5.65645	6.17163	6.13264	1.41	-1.003	1.429	-1.027	1.391	0.0663065	0.992831	0.132066	0.931291	0.113089	1	0	1	1	1	OoCcMur
18786	8.65503	9.17971	8.94297	9.04269	8.93342	0.7455	-1.1785	1.072	-0.102	-0.009	0.00526194	0.196557	0.60314	0.120788	0.0343922	1	1	1	1	1	Oo
18789	7.59771	6.89754	7.13871	7.31671	7.15238	-1.15633	0.531333	0.482	-0.475	-0.322333	0.0181752	0.341359	0.314096	0.485029	0.741607	0.333333	1	1	1	1	Oo
18791	9.5438	11.7447	11.8453	11.8993	11.9636	4.598	1.072	1.038	1.046	1.085	4.21797e-12	0.555977	0.782146	0.751954	0.426159	1	1	1	1	1	Oo
18793	6.33978	6.32363	6.36913	6.16709	6.12339	-1.011	1.032	-1.15	-1.031	-1.186	0.938528	0.878263	0.458491	0.896796	0.272692	1	1	1	1	1	Oo
18795	8.86731	8.9151	8.43527	8.42023	8.1417	1.034	-1.395	-1.01	-1.213	-1.226	0.834609	0.0781223	0.969014	0.420589	0.247976	1	1	0	0	0	Oo
18803	9.21092	8.55878	8.34066	8.31435	8.45497	-1.5715	-1.167	-0.0235	0.1445	0.09	0.00493331	0.499436	0.176618	0.0916212	0.518536	1	1	1	0.5	1	Oo
18805	4.99764	8.53732	9.25973	9.61682	9.86987	14.573	1.65	1.281	1.195	1.529	2.2259e-12	0.0142044	0.146886	0.371561	0.0402513	1	0.5	1	1	1	Oo
18806	4.53219	6.71003	8.84926	9.06718	8.84742	4.582	4.4555	1.166	-1.1645	-0.0015	2.91213e-07	6.40527e-06	0.591669	0.630378	0.765922	0.5	0	1	1	1	OoMur
18807	6.86475	7.16257	7.22298	7.19338	7.05583	1.229	1.043	-1.021	-1.1	-1.123	0.122196	0.831079	0.926017	0.636632	0.455151	1	0	0	0	0	OoMur
18813	7.85385	7.19535	6.64903	6.88208	7.00119	-1.59825	-1.47325	1.18025	0.58825	0.81425	0.0189801	0.0419842	0.386965	0.198928	0.0092017	1	1	0.75	1	1	OoMur
18817	6.87705	8.736	8.7308	8.71197	9.12534	3.627	-1.004	-1.013	1.332	1.315	6.88127e-10	0.984156	0.94395	0.0521484	0.0264909	1	1	1	1	1	Oo
18823	4.09687	2.50221	1.49191	2.84897	3.5196	-3.02	-2.014	2.562	1.592	4.078	0.0351319	0.273062	0.154183	0.539334	0.0174496	0	1	0	0	0	OoCcMur
18824	5.92985	5.80435	5.74022	5.99127	6.03971	-1.091	-1.045	1.19	1.034	1.231	0.560403	0.838617	0.380527	0.893986	0.212599	1	1	0	0	1	Oo
18826	8.79569	8.88051	7.45263	6.94752	6.78416	0.0715	-2.712	-1.4315	-1.12	-1.61	0.0811741	2.74948e-07	0.0467666	0.418081	0.0057001	1	1	1	1	1	Oo
18844	8.75527	9.27866	9.21542	8.86703	9.21746	1.437	-1.045	-1.273	1.275	1.001	0.00189341	0.796123	0.0722621	0.115384	0.9919	1	1	1	1	1	Oo
18845	7.18954	8.13922	7.83987	7.40761	7.88954	2.10133	-1.24033	-1.364	1.399	-0.287333	0.0647196	0.376658	0.251841	0.113952	0.405343	1	0	0.666667	0.333333	0.666667	OoCcMur
18846	6.97311	6.21526	6.3263	6.45903	6.57756	-1.691	1.08	1.096	1.086	1.19	0.000726555	0.68582	0.649828	0.701116	0.266486	1	1	1	1	1	Oo
18933	4.74619	5.39281	5.17468	5.34156	5.46681	1.566	-1.163	1.123	1.091	1.224	0.104627	0.69177	0.78305	0.854275	0.532932	0	0	0	0	1	Oo
18938	3.50187	4.2157	6.26542	6.2344	6.64821	1.64	4.14	-1.022	1.332	1.304	0.168573	0.00279779	0.971163	0.5943	0.530761	0	0	1	1	1	Oo
18949	7.24361	6.84396	6.6359	6.81983	7.24081	-0.395	-1.1555	0.1565	1.3605	1.6355	0.287155	0.286013	0.310005	0.223564	0.394508	1	1	1	1	1	Oo
18950	7.34613	7.61925	8.57428	8.8794	9.20066	1.208	1.939	1.236	1.249	1.544	0.0351551	6.10757e-06	0.0572407	0.0626245	0.000185859	1	1	1	1	1	Oo
18968	7.67306	7.61132	7.21998	7.67458	7.94361	-1.044	-1.312	1.37	1.205	1.651	0.668995	0.0254683	0.0121633	0.155222	0.000128665	1	1	1	1	1	Oo
18969	6.20031	6.41018	6.42019	6.54795	6.55221	1.157	1.007	1.093	1.003	1.096	0.41739	0.982546	0.74471	0.992192	0.672899	1	0	1	1	1	Oo
18970	6.76579	7.04668	7.56691	7.75363	8.19362	1.2155	1.4375	1.138	1.3935	1.582	0.160507	0.0385663	0.466302	0.327073	0.026478	0.5	1	1	1	1	Oo
18971	7.53042	6.77906	6.94819	6.36554	6.10129	-1.684	1.125	-1.518	-0.221	-1.91	7.95029e-05	0.405531	0.0305214	0.512374	0.0181366	1	0.5	1	0.5	0.5	Oo
18972	7.53226	7.35983	7.83901	7.70817	7.73674	-1.127	1.394	-1.095	1.02	-1.073	0.290883	0.0188198	0.576916	0.917839	0.602903	1	0	1	1	1	Oo
18973	8.32465	8.28502	7.67168	7.33906	7.5919	-1.028	-1.53	-1.259	1.192	-1.057	0.897465	0.0795616	0.391403	0.552788	0.826477	1	0	1	1	1	OoCc
18974	8.3892	8.63917	8.5762	8.14851	8.09729	1.189	-1.045	-1.345	-1.036	-1.394	0.0605993	0.733876	0.0114695	0.812625	0.00268593	1	1	1	1	1	Oo
18975	6.37016	6.09207	5.92941	5.90604	6.04181	-0.2715	-1.1195	-0.017	1.099	1.083	0.155105	0.54595	0.833892	0.662315	0.659499	1	0.5	1	1	1	Oo
18983	7.66252	7.37211	7.61555	8.47646	8.72483	-0.0926667	0.549667	1.864	1.188	2.209	0.247006	0.295738	0.00370141	0.287456	8.42295e-05	0.666667	1	1	1	1	Oo
18984	6.21975	6.96695	7.17833	6.84204	6.75867	1.679	1.158	-1.263	-1.059	-1.338	0.00079103	0.40532	0.189964	0.79593	0.0599424	0	0	1	0	0	OoCcMur
18986	6.24027	6.57986	6.62793	6.76209	6.81873	0.656	1.034	0.447333	0.378	0.489	0.0408066	0.854224	0.341108	0.641758	0.150903	0.666667	0.666667	0.666667	0.666667	1	Oo
18996	8.20045	9.12606	9.11599	9.13491	9.20547	1.915	-0.0075	0.0145	1.0515	1.0645	0.000311788	0.945367	0.731838	0.862669	0.730819	1	1	1	1	1	Oo
18999	7.38899	8.10136	8.0166	8.09542	8.48139	1.638	-1.061	1.056	1.307	1.38	0.000650847	0.744232	0.779894	0.119356	0.0274059	1	1	1	1	1	Oo
19012	6.4882	7.0811	7.6405	9.1893	8.98113	1.5085	1.475	2.9425	-1.1575	2.535	0.00166922	0.0119885	1.6282e-06	0.423852	1.42068e-06	1	1	1	1	1	OoCc
19014	7.20066	7.0932	6.9124	7.14033	7.15013	-0.353667	-0.481667	1.17633	0.335333	0.530667	0.000684188	0.20212	0.386868	0.330195	0.212723	0.666667	0.666667	0.666667	0.666667	1	OoCc
19016	1.9925	5.48229	5.64565	6.47566	6.46251	11.234	1.12	1.778	-1.009	1.762	1.85683e-10	0.652742	0.0148269	0.977543	0.00885426	0	0	0	1	1	Oo
19018	7.41514	7.18397	7.41698	7.70187	7.42545	-1.174	1.175	1.218	-1.211	1.006	0.334102	0.452056	0.375612	0.414951	0.978321	1	1	1	1	1	Oo
19023	4.50419	4.93941	5.37155	5.17045	5.17734	1.352	1.349	-1.15	1.005	-1.144	0.0714634	0.138978	0.554723	0.986551	0.488183	0	0	1	0	1	Oo
19024	8.1503	7.36878	8.24517	7.87859	8.06583	-1.719	1.836	-1.289	1.139	-1.132	0.000846863	0.00177741	0.173997	0.543992	0.460841	1	1	1	1	1	Oo
19025	7.7294	7.47939	6.69355	6.52234	6.60079	-0.2565	-1.027	-0.1905	0.071	-0.0785	0.11366	0.441469	0.0858275	0.399027	0.442703	0.5	0.5	0	0	0.5	OoCc
19027	9.52076	8.93076	8.79443	8.99331	8.9799	-1.2608	-0.312	0.3646	-0.2102	0.3682	0.172926	0.219138	0.244995	0.418546	0.176204	0.6	0.8	0.8	1	0.8	OoCc
19035	10.445	9.8137	9.72374	9.43993	9.26809	-1.598	-1.0645	-1.219	-1.1325	-1.3885	0.0544578	0.655141	0.139092	0.533166	0.0471726	1	1	1	1	1	Oo
19042	5.57326	5.46193	5.62099	5.84992	6.23743	-1.08	1.117	1.172	1.308	1.533	0.581526	0.547842	0.396064	0.146689	0.00829555	0	0	1	0	1	Oo
19043	8.62984	10.0249	10.1681	10.3286	10.0465	2.823	1.10533	1.121	-1.226	-1.08967	6.09075e-06	0.447024	0.490454	0.328718	0.498443	1	1	1	1	1	Oo
19044	5.17747	6.66617	6.13403	5.96282	6.0649	2.806	-1.446	-1.126	1.073	-1.049	5.6564e-06	0.0772603	0.635623	0.801236	0.825375	1	0	1	0	0	Oo
19045	9.55073	8.98356	8.75213	8.25271	8.17767	-1.482	-1.174	-1.414	-1.053	-1.489	0.00923475	0.3813	0.0567932	0.827869	0.0162198	1	1	1	1	1	Oo
19046	7.56913	6.46903	6.06812	5.85942	6.52266	-2.00675	-0.86525	-0.66275	1.593	1.401	0.000921827	0.143234	0.511325	0.048657	0.229091	0.75	1	0.75	0.75	1	OoCc
19047	9.8862	8.83178	8.54978	8.42538	8.44318	-2.078	-1.216	-1.09	0.013	-1.0785	5.8305e-07	0.0947591	0.514512	0.658237	0.528417	1	1	1	0.5	1	Oo
19052	9.43249	8.82247	8.61925	8.43547	7.8673	-1.6245	-1.1575	-0.1645	-1.558	-0.9655	0.226815	0.516864	0.181262	0.28084	0.316494	1	1	1	0.5	0.5	Oo
19053	7.63094	6.45102	6.08301	3.8438	3.30133	-2.266	-1.291	-4.721	-1.456	-6.876	0.0360108	0.62057	0.00236026	0.496863	0.000148674	0	1	0	0	0	Oo
19055	7.63246	6.7331	6.05536	5.64963	5.92658	-1.965	-1.65933	-0.695333	0.578667	-0.443	0.137562	0.159058	0.310571	0.557441	0.450396	1	1	0.666667	0.333333	0.333333	Oo
19056	10.8246	9.82935	9.20056	8.78338	8.51746	-1.9995	-1.5505	-1.3425	-0.2345	-1.7005	0.000569822	0.0404887	0.0674473	0.395258	0.0763505	1	1	1	1	1	Oo
19057	6.89873	5.7022	5.75334	5.26911	4.93239	-2.292	1.036	-1.399	-1.263	-1.767	0.0220778	0.949729	0.493107	0.664462	0.14995	0	1	0	0	0	OoMur
19058	7.91955	8.7798	8.57834	8.40529	8.88429	1.815	-1.15	-1.127	1.394	1.236	1.6593e-05	0.303218	0.418251	0.0275101	0.081906	1	1	1	1	1	Oo
19062	8.26638	7.74796	7.73297	7.7653	7.8503	-1.432	-1.01	1.023	1.061	1.085	0.000234778	0.937819	0.86488	0.642937	0.400191	1	1	1	1	1	Oo
19063	6.33377	6.81491	6.72164	5.95909	6.05289	1.396	-1.067	-1.696	1.067	-1.59	0.0337313	0.765885	0.00789818	0.794674	0.00978417	1	1	1	1	1	Oo
19069	9.51057	9.5702	9.85632	10.004	10.0756	1.042	1.219	1.108	1.051	1.164	0.64586	0.0650407	0.389656	0.718091	0.125025	1	1	1	1	1	Oo
19070	9.70615	9.56934	9.36945	8.26357	7.45996	-0.441667	-0.501	-2.42633	-1.289	-4.87367	0.127328	0.182415	0.30615	0.0884168	0.0769413	1	1	1	0.666667	0.666667	Oo
19072	7.50371	7.94645	8.17818	8.30241	8.45132	0.5805	1.1745	0.1015	0.1275	1.21	0.0398209	0.3927	0.442179	0.382101	0.266405	0.5	0.5	0.5	0.5	0.5	Oo
19073	8.15133	7.81893	8.66375	8.99321	9.02094	-1.259	1.796	1.257	1.019	1.281	0.0654235	0.000671312	0.151296	0.926414	0.0755253	1	1	1	1	1	Oo
19075	8.94801	8.52423	8.73434	8.74652	8.5423	-1.3495	1.159	0.0085	-1.1525	-1.1445	0.0233589	0.358053	0.811942	0.382812	0.366991	1	1	1	1	1	Oo
19076	8.14467	7.70356	8.3887	8.24835	8.22316	-0.476	1.608	-1.106	-0.0185	-0.132	0.0614885	0.00980479	0.512954	0.704957	0.461251	1	1	1	1	1	Oo
19079	8.31672	8.9311	9.22537	9.56248	9.44341	1.531	1.226	1.263	-1.086	1.163	4.75367e-05	0.0503603	0.0298685	0.503367	0.113753	1	1	1	1	1	Oo
19082	7.66575	7.83271	7.86367	8.01456	7.78487	1.123	0.0225	0.1185	-1.1735	-0.0645	0.509769	0.851645	0.661393	0.527245	0.426107	1	1	1	1	1	Oo
19084	8.03162	7.90113	7.84383	7.64007	7.49014	-0.1395	-0.0445	-1.1525	-0.126	-1.293	0.00680155	0.482564	0.419932	0.368052	0.2814	1	1	1	1	1	Oo
19087	9.83493	9.5787	9.47644	9.95926	9.98552	-1.1945	-0.081	1.3975	0.0215	1.4425	0.0733707	0.383766	0.0107071	0.326082	0.0639187	1	1	1	1	1	Oo
19088	8.596	7.67787	7.48905	8.21039	8.48221	-2.038	-0.48	1.74033	1.208	2.12	0.196638	0.556976	0.167312	0.505514	0.0288569	0.666667	1	0.666667	1	1	Oo
19089	7.26205	7.76972	7.73875	7.6619	7.64421	1.422	-1.022	-1.055	-1.012	-1.068	0.0057736	0.908414	0.770554	0.951144	0.651254	1	0	1	1	1	Oo
19090	7.19048	7.39663	7.38611	7.22783	6.68937	1.154	-1.007	-1.116	-1.452	-1.621	0.336767	0.976909	0.609614	0.065137	0.00601849	1	1	1	1	1	Oo
19091	3.8315	3.27946	5.30067	6.6628	6.03741	-1.466	4.059	2.571	-1.543	1.666	0.443165	0.0229324	0.137773	0.556358	0.371453	0	0	0	1	1	Oo
19092	4.26756	3.96502	3.83761	5.39426	5.50591	-1.236	-0.098	3.8235	1.0835	3.9545	0.430305	0.62845	0.0350947	0.725315	0.00285921	0	0	0	0	1	OoMur
19094	4.86682	6.31756	5.996	4.33509	5.17767	2.733	-1.25	-3.162	1.793	-1.763	0.00109119	0.543531	0.0019478	0.115719	0.0683365	1	0	1	0	0	Oo
19108	6.60066	6.68466	6.40043	6.27049	6.16746	0.0665	-1.2245	-0.104	-0.0815	-0.2125	0.339395	0.343995	0.452527	0.495479	0.269346	1	1	1	1	1	OoMur
19116	4.25806	4.7637	4.18281	4.42892	5.08001	1.4235	-1.51	0.205	1.73	1.9305	0.229173	0.196777	0.534711	0.528071	0.0385997	0.5	0	0	0.5	1	OoCcMur
19122	6.76326	7.61638	7.29706	6.39278	6.32971	1.8145	-1.2475	-2.2235	-0.049	-1.4655	1.16925e-05	0.0675437	0.438231	0.490937	0.37007	1	0.5	1	0	0	Oo
19123	5.20404	7.0249	7.33091	7.34536	7.27784	3.533	1.236	1.01	-1.048	-1.037	3.60809e-08	0.223327	0.966273	0.845479	0.837395	1	0	1	1	1	Oo
19125	6.41786	6.77629	7.08317	6.70907	6.85207	1.282	1.237	-1.296	1.104	-1.174	0.0390908	0.139536	0.0834267	0.572942	0.229779	1	0	1	1	1	OoCcMur
19126	9.61162	8.32975	7.21619	7.92506	7.42881	-2.432	-2.164	1.635	-1.411	1.159	1.71969e-08	2.16163e-06	0.000262781	0.0108451	0.164925	1	1	1	1	1	Oo
19134	6.61057	6.00635	5.76124	5.79013	5.85893	-0.84625	-0.758	-0.444	0.05325	0.1155	0.104018	0.421431	0.30152	0.715492	0.338118	0.75	1	0.5	0.25	0.75	OoCc
19141	5.71111	8.09596	8.46457	8.32233	8.37507	5.223	1.291	-1.104	1.037	-1.064	1.17832e-09	0.146029	0.640456	0.879948	0.727068	1	1	1	1	1	Oo
19142	5.94228	7.42107	7.2231	8.90367	8.62419	2.787	-1.147	3.206	-1.214	2.641	3.51239e-08	0.345391	1.7551e-07	0.212029	4.40944e-07	0	0	1	1	1	Oo
19155	7.15463	6.35633	6.29281	6.13863	5.49026	-1.739	-1.045	-1.113	-1.567	-1.744	1.38803e-05	0.751795	0.432808	0.00286029	4.99005e-05	1	1	1	1	1	Oo
19156	7.0736	7.04631	6.34133	6.47074	6.17931	-1.019	-1.63	1.094	-1.224	-1.119	0.824129	6.76646e-05	0.42307	0.0684654	0.223429	1	1	1	0	0	Oo
19157	4.7446	5.43926	5.41495	6.25988	6.20861	5.412	-0.0215	1.7995	-0.039	1.753	0.000616095	0.73124	0.394635	0.927987	0.364651	0	0.5	0.5	0.5	0.5	Oo
19158	6.62544	7.77989	8.21522	7.91359	8.08688	2.226	1.352	-1.233	1.128	-1.093	1.70805e-05	0.0892974	0.275548	0.581141	0.612488	1	0	1	1	1	Oo
19159	8.46283	7.93861	7.75609	7.27514	6.19842	-1.438	-1.135	-1.396	-2.109	-2.944	0.00815151	0.452378	0.0431151	0.000451205	5.45784e-07	1	1	1	0	0	OoMur
19164	9.08992	9.22574	9.14255	9.26563	9.40804	0.1125	-1.0595	1.09	1.104	1.204	0.187919	0.603128	0.499688	0.398042	0.0746633	0.5	0.5	0.5	1	0.5	Oo
19165	8.69001	8.75368	8.58149	8.77415	8.84227	1.045	-1.127	1.143	1.048	1.198	0.650501	0.319955	0.286782	0.75545	0.0920549	1	1	1	1	1	Oo
19166	10.8105	11.2741	11.297	11.4082	11.3122	1.379	1.016	1.08	-1.069	1.011	0.000409766	0.895593	0.484145	0.572932	0.919862	1	1	1	1	1	Oo
19167	10.764	10.7235	10.3087	10.3722	10.3037	-1.028	-1.333	1.045	-1.049	-1.003	0.769475	0.013897	0.756818	0.746628	0.977194	1	1	1	1	1	Oo
19170	7.64548	7.41523	7.61254	7.80631	7.85829	-1.1735	1.157	1.148	1.037	1.189	0.227872	0.516361	0.477578	0.879757	0.334176	0.5	0.5	0.5	1	1	Oo
19172	10.1713	8.80503	9.03505	9.03536	9.05233	-2.991	1.176	0	0.015	0.016	0.00348677	0.427056	0.843323	0.212921	0.0776188	1	1	1	1	1	Oo
19175	10.3824	10.4216	10.3821	10.4089	10.2425	1.028	-1.028	1.019	-1.122	-1.102	0.754773	0.825323	0.89106	0.323229	0.315176	1	1	1	1	1	Oo
19177	9.98589	10.512	10.3114	10.399	10.7169	1.44	-1.149	1.063	1.247	1.325	0.00365706	0.347389	0.730317	0.158835	0.0339245	1	0	1	1	1	Oo
19179	8.75186	8.14216	8.53791	8.80809	8.69599	-1.526	1.316	1.206	-1.081	1.116	0.00106166	0.0531428	0.214033	0.660661	0.413998	1	1	1	1	1	Oo
19181	10.6956	10.7886	10.5261	10.9655	10.8511	0.0865	-1.208	1.3785	-1.0825	1.2745	0.0315364	0.350311	0.204668	0.648142	0.390087	1	1	1	1	1	OoMur
19182	9.2435	8.94977	8.81577	8.71095	8.60715	-1.226	-1.097	-1.075	-1.075	-1.156	0.0937011	0.565517	0.685299	0.701365	0.293639	1	0	1	1	1	Oo
19183	8.43391	9.7967	9.95654	9.26306	9.04716	2.576	1.121	-1.621	-1.168	-1.8795	1.75827e-07	0.525459	0.00146807	0.452563	8.27765e-05	1	0.5	1	1	1	Oo
19185	9.04855	9.32445	9.64623	9.70415	9.5798	1.2255	1.25	1.0415	-1.091	-1.047	0.42613	0.190107	0.814188	0.630786	0.758863	1	1	1	1	1	Oo
19188	6.74688	6.69919	6.76815	6.31918	6.38428	-1.034	1.049	-1.365	1.046	-1.305	0.813848	0.807708	0.0695026	0.843839	0.0800519	1	0	1	0	1	Oo
19192	6.2936	7.35296	7.05851	7.20231	7.6359	1.865	-0.3175	1.1095	1.383	1.5655	0.15201	0.0400923	0.697549	0.320122	0.239262	1	1	1	1	1	OoCc
19197	5.50654	5.44946	5.41424	5.68379	5.71815	-1.04	-1.025	1.205	1.024	1.234	0.834267	0.932505	0.454665	0.938204	0.306609	1	1	0	1	1	Oo
19200	6.05668	7.89297	8.23744	8.48874	8.38076	3.571	1.27	1.19	-1.078	1.104	4.90376e-11	0.0285474	0.121417	0.568079	0.325052	1	0	1	1	1	Oo
19201	4.91354	6.37479	6.76382	7.05818	7.07717	2.753	1.31	1.226	1.013	1.243	1.04678e-08	0.0342981	0.122055	0.939326	0.0621931	1	0	1	1	1	Oo
19205	6.09951	7.82896	7.01654	7.01573	7.96646	3.316	-1.756	-1.001	1.933	1.932	3.13265e-06	0.0175131	0.998362	0.0143756	0.00378231	0	0	0	0	1	Oo
19206	7.93515	7.07384	6.63145	3.64555	3.14791	-1.817	-1.359	-7.922	-1.412	-11.185	0.0413523	0.40509	9.72375e-06	0.393774	4.77649e-07	1	1	1	0	0	Oo
19210	9.40694	9.44347	9.02842	8.93447	9.01262	0.0265	-1.334	-1.0685	1.0565	-0.011	0.539041	0.0163602	0.636122	0.709538	0.930682	1	1	1	1	1	Oo
19211	9.24257	8.38334	7.64035	7.47217	7.0435	-1.9675	-1.7045	-0.1405	-1.35	-1.521	0.0503784	0.00467253	0.34381	0.0762749	0.00396848	1	1	1	1	1	OoMur
19212	6.61336	7.43022	7.55453	7.51152	7.33355	1.8165	1.09	-1.0305	-1.138	-1.173	0.0627411	0.625334	0.892698	0.683314	0.49974	1	0.5	0.5	1	1	OoCcMur
19215	8.30144	6.63718	5.91957	5.7371	5.9347	-3.17	-1.644	-1.135	1.147	1.011	1.01012e-06	0.0171229	0.598293	0.582581	0.962231	1	1	0	0	0	OoCc
19218	5.35868	4.60506	4.91153	5.10494	5.28135	-1.686	1.237	1.143	1.13	1.292	0.00491895	0.333549	0.591738	0.643353	0.191258	0	1	0	1	1	OoCcMur
19219	4.27471	5.94549	6.67696	6.18838	6.01836	3.184	1.6605	-1.404	-0.155	-1.653	4.80332e-05	0.0414809	0.189274	0.356819	0.30478	0.5	0	1	0.5	1	Oo
19221	10.2541	10.0314	9.69473	9.18076	9.02795	-1.167	-1.263	-1.428	-1.112	-1.588	0.16472	0.0907055	0.0113231	0.566165	0.000831909	1	1	1	1	1	Oo
19223	7.05001	8.83596	9.64275	9.84659	9.60839	3.448	1.749	1.152	-1.18	-1.024	2.66426e-09	0.000502729	0.356844	0.294382	0.871205	1	0	1	1	1	OoMur
19227	1.20817	4.20319	5.24363	5.25636	5.27744	7.972	2.057	1.009	1.015	1.024	5.58581e-08	0.0165851	0.982759	0.972444	0.939909	0	0	0	0	1	Oo
19230	8.65622	7.87656	8.3287	7.99722	7.64554	-1.717	1.368	-1.258	-1.276	-1.606	2.45903e-05	0.0141875	0.0747256	0.076501	0.000326738	0	1	1	1	1	Oo
19231	11.3968	10.174	9.69089	9.39926	8.91287	-2.334	-1.398	-1.224	-1.401	-1.715	1.46612e-08	0.00392011	0.0725946	0.00868765	2.0988e-05	1	1	1	1	1	Oo
19240	8.94245	8.79269	8.53803	8.32015	7.34713	-0.12575	-0.7125	-1.172	-2.0945	-2.40925	0.414187	0.211497	0.555797	0.0234027	0.000685616	0.75	0.75	0.75	0.75	0.5	OoCc
19242	6.26557	5.58264	5.70694	5.36177	5.4385	-1.722	0.103	-1.288	0.066	-0.275	0.278096	0.56666	0.505469	0.463876	0.161451	0.5	1	0.5	0.5	0.5	Oo
19243	6.69852	5.74568	5.77178	6.03496	5.76192	-1.936	1.018	1.2	-1.208	-1.007	7.34426e-05	0.934236	0.315511	0.319177	0.969498	0	1	0	0	0	Oo
19244	7.94847	7.65257	7.83202	8.34774	8.41495	-0.608333	1.133	1.431	0.38	1.54933	0.0405397	0.441227	0.073712	0.135144	0.286441	1	1	0.666667	1	1	OoCc
19246	7.20795	7.00435	7.07798	7.24056	7.07584	-0.182	0.0625	0.146	-1.1245	-0.002	0.20456	0.205716	0.158132	0.570966	0.187557	1	0.5	1	1	1	Oo
19247	9.05257	8.39384	8.40583	8.4876	7.867	-0.9125	0.009	0.0675	-1.5955	-1.46	0.00290366	0.561397	0.348168	0.0654096	0.0459612	0.5	1	0.5	0.5	0.5	Oo
19248	7.89719	7.86612	8.13981	7.96438	7.76334	-0.355667	1.21	-1.131	-1.15	-1.30067	0.53123	0.154755	0.396165	0.317999	0.0657417	1	1	1	1	1	OoCcMur
19250	8.66119	7.14652	8.16689	8.57243	8.15135	-2.857	2.028	1.325	-1.339	-1.011	1.69689e-05	0.00476577	0.266099	0.322165	0.969622	0	1	0	0	1	Oo
19252	4.21114	7.5995	8.61775	8.49687	8.70761	10.471	2.025	-1.087	1.157	1.064	2.0172e-11	0.000813293	0.714248	0.510369	0.740976	1	0	1	1	1	OoMur
19253	9.13983	9.99098	10.0419	9.88501	8.80206	1.804	1.036	-1.115	-2.118	-2.362	0.000129032	0.853835	0.55467	0.000422769	7.51868e-06	1	1	1	1	1	Oo
19255	9.02848	9.1731	9.4162	9.3817	9.47173	0.45	1.188	-0.357667	0.401	0.374667	0.0604703	0.333594	0.447518	0.679953	0.420893	1	0.666667	1	0.666667	0.666667	OoCc
19256	6.08682	4.1437	4.17677	4.41343	4.14097	-3.845	1.023	1.178	-1.208	-1.025	1.89852e-06	0.943723	0.575985	0.530484	0.926538	0	1	0	0	0	Oo
19260	4.33495	6.45728	7.077	7.21977	7.10514	4.354	1.537	1.104	-1.083	1.02	2.10437e-05	0.199925	0.814898	0.865221	0.956796	1	0	1	1	1	OoCc
19261	6.70073	6.60337	6.78842	6.90413	7.12744	-1.07	1.137	1.084	1.167	1.265	0.582444	0.409141	0.653092	0.358519	0.0844022	1	1	1	1	1	Oo
19263	4.22619	3.85539	4.6713	5.84986	5.34553	-1.293	1.76	2.264	-1.418	1.596	0.115982	0.00699422	0.00038681	0.11122	0.0134848	0	0	1	1	1	Oo
19266	6.83307	5.67411	5.58515	6.17813	6.41779	-2.281	-0.407	1.51267	1.186	1.79367	0.000110582	0.468141	0.117333	0.500967	0.0158531	0.666667	1	0.333333	0.666667	1	OoMur
19267	6.48241	7.01745	7.76476	8.74502	9.05014	1.4865	1.7285	1.973	1.242	2.4555	0.168021	0.064492	0.000465958	0.337699	1.20942e-05	1	1	1	1	1	OoCc
19268	8.90905	9.15123	8.46287	8.28034	8.39998	1.197	-1.622	-1.135	1.0885	-0.0465	0.474176	0.0107617	0.497251	0.700745	0.671348	1	1	1	1	1	Oo
19270	6.3766	8.03323	7.80438	7.31	7.25237	3.57375	-0.69925	-1.51275	0.419	-0.621	0.000631158	0.339177	0.466384	0.463911	0.292932	1	0.25	1	0.5	0.5	Oo
19271	5.51095	6.73961	5.76223	4.67826	4.19997	2.343	-1.969	-2.12	-1.393	-2.953	0.000141447	0.0054927	0.00273761	0.192685	3.92017e-05	1	1	0	0	0	Oo
19272	5.92366	5.82323	5.63948	6.10864	5.77759	-0.0775	-0.157	1.4055	-1.265	1.103	0.685527	0.568613	0.357585	0.550474	0.785088	0.5	0.5	0.5	0.5	0.5	Oo
19277	6.15697	5.60947	6.78732	7.26033	7.17513	-1.462	2.262	1.388	-1.061	1.308	0.0276065	0.000525005	0.125886	0.83371	0.154501	0	0	1	1	1	Oo
19279	6.45597	6.78066	7.631	8.30685	8.2522	1.252	1.803	1.598	-1.039	1.538	0.028641	8.06164e-05	0.000727086	0.818637	0.00067924	1	0	1	1	1	Oo
19280	7.38616	8.1013	6.8153	6.5546	6.79935	1.642	-2.439	-1.198	1.185	-1.011	0.000466825	1.00716e-05	0.267022	0.323229	0.94552	1	1	1	1	1	Oo
19281	6.31536	5.89769	5.85335	5.78638	5.90041	-1.336	-1.031	-1.048	1.082	1.033	0.0200448	0.863887	0.802212	0.669108	0.831353	1	1	0	0	0	Oo
19283	5.75825	5.1798	5.40643	5.27819	4.891	-1.493	1.17	-1.093	-1.308	-1.429	0.0574691	0.573142	0.780014	0.354195	0.127795	0	1	0	0	0	OoCcMur
19286	6.39172	6.11861	5.96009	5.74074	5.34361	-1.208	-1.116	-1.164	-1.317	-1.533	0.227193	0.602605	0.486216	0.194056	0.0180028	1	1	1	0	1	Oo
19290	5.31489	5.32875	5.67296	5.93253	5.90358	1.01	1.269	1.197	-1.02	1.173	0.956339	0.243766	0.4281	0.943393	0.40316	0	1	0	0	0	OoCc
19291	6.16058	5.11651	5.17517	4.00309	4.67396	-2.5105	1.042	-2.4605	1.595	-0.578	0.417159	0.945459	0.211215	0.365203	0.389195	0.5	0.5	0.5	0	0	Oo
19294	5.97474	5.6713	5.75326	5.58617	5.91288	-1.234	1.058	-1.123	1.254	1.117	0.239737	0.829292	0.661976	0.364487	0.608628	1	1	1	1	1	OoCcMur
19296	3.35429	5.99343	7.48406	8.35123	8.08939	6.7485	3.0355	1.8305	-1.199	1.525	4.57614e-06	0.0986793	0.159865	0.650626	0.241442	0.5	0	1	1	1	Oo
19299	10.3037	10.5142	10.1555	9.26959	8.83791	1.157	-1.282	-1.848	-1.349	-2.492	0.0723636	0.0140376	5.44676e-06	0.00982321	1.12465e-08	1	1	1	1	1	Oo
19300	0.64081	6.60489	6.24711	4.71738	4.8054	62.426	-1.281	-2.887	1.063	-2.716	5.8375e-15	0.175942	1.1283e-05	0.803999	7.14761e-06	1	0	0	0	0	OoCc
19301	8.15393	8.47728	8.50317	8.33936	7.99657	1.251	1.018	-1.12	-1.268	-1.421	0.0449137	0.916997	0.45506	0.107511	0.00665662	1	1	1	1	1	Oo
19302	6.19739	6.58168	6.71774	6.08881	5.76993	1.305	1.099	-1.546	-1.247	-1.929	0.00739042	0.436286	0.00078626	0.0821661	4.17713e-06	0	1	1	0	0	Oo
19303	6.39953	6.6499	6.96049	7.08419	7.44679	0.2205	1.2435	1.0915	1.286	1.4025	0.317598	0.23268	0.639047	0.147882	0.0339413	0.5	0.5	0.5	0.5	1	Oo
19305	5.83698	7.77911	7.31428	5.96943	5.87432	3.843	-1.38	-2.54	-1.068	-2.713	1.17116e-08	0.057409	1.94063e-05	0.765204	2.93548e-06	1	0	1	1	1	Oo
19317	8.75693	8.29242	7.62632	7.89643	8.09486	-1.38933	-1.69133	1.20567	0.498	1.40533	0.201651	0.121265	0.410847	0.662883	0.197413	0.666667	1	0.666667	0.666667	0.666667	OoCc
19324	8.1577	7.51403	7.14694	6.60703	6.66422	-1.35933	-1.337	-1.52133	0.376667	-1.48767	0.02832	0.448163	0.288865	0.892463	0.370341	0.666667	0.666667	0.666667	0.333333	0.666667	Oo
19325	9.09963	8.45995	8.19702	8.40597	8.46266	-1.595	-1.20533	0.496333	0.375	1.21233	0.0230165	0.304567	0.446241	0.437748	0.341969	1	1	1	1	1	Oo
19326	9.42713	8.85892	8.50963	7.55381	7.20555	-1.483	-1.274	-1.94	-1.273	-2.469	0.00219906	0.0916153	0.000128071	0.126014	1.38622e-06	1	1	1	1	1	OoMur
19328	6.95223	7.12431	6.81096	6.8703	6.78424	1.127	-1.243	1.042	-1.061	-1.019	0.455889	0.272623	0.870744	0.820424	0.928869	1	1	1	1	1	Oo
19329	3.63623	5.38214	5.46619	5.9156	6.1754	3.354	1.06	1.365	1.197	1.635	0.000119667	0.883891	0.379463	0.653853	0.0972811	1	0	1	1	1	Oo
19330	8.77855	8.82827	8.99698	8.81596	8.8707	1.035	1.124	-1.134	1.039	-1.091	0.629859	0.172232	0.164151	0.729502	0.27119	1	1	1	1	1	Oo
19334	7.29427	7.4015	7.02723	6.83398	6.92316	0.13	-1.3025	-1.144	0.0775	-0.0885	0.0262617	0.316507	0.536905	0.298418	0.341485	0.5	1	0.5	0.5	0.5	Oo
19335	7.77274	9.14126	9.02654	8.81648	9.04662	2.582	-1.083	-1.157	1.173	1.014	5.51851e-08	0.622894	0.322567	0.350754	0.930373	1	0	1	1	1	Oo
19336	6.91655	5.76989	5.57573	4.56911	3.57796	-2.217	-1.144	-2.0095	-2.111	-4.2565	0.00071808	0.561014	0.0104694	0.0371439	2.26259e-06	1	1	1	0	0	Oo
19338	7.20976	8.09584	8.08481	7.84439	7.53758	1.848	-1.008	-1.181	-1.237	-1.461	8.62669e-05	0.972554	0.334625	0.225152	0.011804	1	1	1	1	1	Oo
19339	11.1647	10.9964	10.6187	10.2546	9.87783	-1.124	-1.299	-1.287	-1.298	-1.671	0.258051	0.0408832	0.051277	0.0760051	0.000149614	1	1	1	1	1	OoCc
19340	7.90631	7.90729	7.76099	8.04924	7.8025	-0.00225	-0.61325	0.74425	-0.71475	0.0325	0.337371	0.424321	0.0925067	0.442148	0.125441	1	1	1	1	1	Oo
19341	4.87232	7.16494	7.18825	7.38107	7.60988	5.1295	0.0175	1.144	1.1735	1.34	4.876e-09	0.759905	0.543251	0.457058	0.112122	1	0	1	1	1	Oo
19342	6.7666	7.20192	7.32046	6.85167	6.82773	1.352	1.086	-1.384	-1.017	-1.407	0.0443367	0.686291	0.0822825	0.94733	0.0410478	1	0	1	1	1	Oo
19345	6.68226	6.49989	5.70992	6.1098	7.21161	-1.135	-1.729	1.319	2.146	2.832	0.563685	0.0398674	0.33725	0.0130527	0.000238692	0	0	0	0	1	Oo
19346	8.51947	9.05171	8.75336	9.08981	9.22756	1.44867	-1.23	1.271	0.438667	1.40433	0.00710541	0.174422	0.221411	0.571594	0.116795	1	1	1	1	1	Oo
19347	9.10413	8.03323	7.66319	7.28071	7.42114	-2.101	-1.292	-1.304	1.102	-1.183	1.68224e-07	0.0267692	0.0253543	0.468779	0.110515	1	1	1	1	1	Oo
19348	6.35256	7.39615	7.31365	7.10937	7.45176	2.061	-1.059	-1.152	1.268	1.1	3.24173e-06	0.722605	0.357324	0.122902	0.475028	1	1	1	1	1	Oo
19349	6.47751	7.6885	7.87601	8.15922	8.05823	2.315	1.139	1.217	-1.073	1.135	1.74194e-06	0.426235	0.234666	0.724165	0.387794	1	0	1	1	1	OoCcMur
19352	7.82215	6.8691	7.16728	7.07294	6.75936	-1.936	1.23	-1.068	-1.243	-1.327	7.2564e-05	0.220636	0.754527	0.242677	0.0668132	1	1	1	1	1	Oo
19353	7.30164	8.24827	8.31748	8.22035	8.19769	1.97	0.384	-0.408333	-0.349333	-1.08733	0.00438116	0.501325	0.371162	0.432523	0.545365	0.666667	0.666667	0.666667	0.666667	1	Oo
19355	5.39979	5.80201	5.66753	5.41128	5.59065	1.322	-1.098	-1.194	1.132	-1.055	0.0237002	0.559402	0.256845	0.469912	0.716635	1	0	1	0	1	Oo
19356	7.8386	7.68303	8.04392	8.06552	8.31562	-1.114	1.284	1.015	1.189	1.207	0.233125	0.0259813	0.919619	0.153343	0.0647791	1	1	1	1	1	Oo
19357	8.12917	6.69313	6.77858	6.96045	7.53233	-2.8355	0.0645	1.1355	1.4865	1.687	4.80777e-05	0.799878	0.54799	0.152038	0.0567863	1	1	1	1	1	OoCc
19359	8.01717	8.70317	8.2192	8.35664	8.93721	1.84967	-1.416	0.44	1.51567	1.693	0.234962	0.0804547	0.511603	0.149621	0.0435944	1	1	1	1	1	Oo
19360	7.39815	7.33409	6.958	6.81084	6.79283	-1.0455	-1.3345	-1.108	-1.0125	-1.1225	0.790672	0.471101	0.680524	0.967137	0.570483	0.5	0.5	1	0.5	0.5	Oo
19361	9.45518	9.70985	9.93955	9.79932	9.8837	1.193	1.173	-1.102	1.06	-1.039	0.0327224	0.10547	0.369888	0.631551	0.693898	1	1	1	1	1	Oo
19362	6.73291	6.4605	6.45408	6.30436	5.85396	-0.583	-0.337667	-0.476	-1.385	-1.636	0.0199073	0.798244	0.4619	0.263942	0.221885	1	0.666667	0.666667	0.666667	0.666667	Oo
19364	5.9778	6.86324	6.60561	6.76135	6.88755	1.847	-1.196	1.114	1.091	1.216	3.60753e-05	0.225083	0.521102	0.627748	0.146224	1	1	1	1	1	Oo
19365	4.64832	5.84123	5.91005	5.69904	5.56056	2.286	1.049	-1.158	-1.101	-1.274	2.61192e-05	0.836604	0.50455	0.690263	0.169434	1	0	1	1	1	Oo
19366	6.71768	6.54031	6.45215	6.66461	6.38684	-1.13133	-0.398333	0.502	-1.222	-0.387333	0.307124	0.615156	0.455135	0.37074	0.219232	1	0.666667	1	1	1	Oo
19378	5.31682	4.36737	6.64762	8.26449	8.17628	-1.931	4.858	3.067	-1.063	2.885	0.0320347	0.000239921	0.00444098	0.905319	0.00330734	0	0	1	1	1	Oo
19383	6.23192	6.5362	6.18387	6.46157	7.2209	1.235	-1.277	1.212	1.693	2.052	0.0863416	0.101408	0.227231	0.0039544	3.04177e-05	1	1	0	0	1	Oo
19384	10.6399	10.3077	9.65562	8.94569	8.66696	-0.8666	-1.691	-1.8602	-0.8288	-2.009	0.000672755	0.114312	0.180492	0.246422	0.161962	1	1	1	1	0.8	Oo
19385	9.49602	9.21446	9.19689	8.9486	8.48086	-1.216	-1.012	-1.188	-1.383	-1.643	0.119352	0.951453	0.296631	0.0571011	0.00133741	1	1	1	1	1	Oo
19386	7.22234	7.14957	6.62462	6.34304	6.52276	-0.056	-1.5085	-0.2605	1.1325	-0.094	0.442256	0.362434	0.295009	0.479479	0.0512216	1	1	1	0.5	0.5	Oo
19387	7.67749	7.57625	7.30756	6.99474	7.96337	-1.073	-1.205	-1.242	1.957	1.576	0.681738	0.403763	0.326673	0.00663777	0.0179995	0	1	0	0	0	Oo
19395	4.30041	4.19428	4.21251	3.63967	4.06128	-1.076	1.013	-1.487	1.339	-1.111	0.804491	0.979562	0.292507	0.47852	0.767937	0	1	0	0	0	Oo
19418	7.33934	7.68695	7.52956	7.39693	7.66235	1.272	-1.115	-1.096	1.202	1.096	0.0831927	0.582991	0.65795	0.3967	0.601552	1	0	1	1	1	Oo
19645	8.92333	8.34352	8.38808	8.522	8.91739	-1.495	1.031	1.097	1.315	1.443	0.00262793	0.866701	0.599831	0.0978306	0.0105308	1	1	1	1	1	Oo
19646	8.41074	7.96944	7.86072	8.04247	7.86036	-0.819667	-0.418667	1.135	-0.477667	-0.330667	0.036351	0.140596	0.502207	0.351409	0.438934	0.666667	0.666667	0.666667	0.666667	1	OoCc
19647	5.86313	5.70903	5.48705	4.57995	4.65963	-0.375333	-0.527667	-2.13933	0.395	-1.89233	0.00445294	0.125479	0.181684	0.371185	0.2308	0.666667	0.666667	0.666667	0.333333	0.333333	Oo
19650	6.15909	7.64147	7.91253	8.25838	8.43206	2.794	1.207	1.271	1.128	1.433	6.46964e-10	0.0719602	0.0272891	0.309175	0.000832888	1	1	1	1	1	OoCcMur
19651	4.79385	3.99968	4.10659	4.46464	4.37124	-1.734	1.077	1.282	-1.067	1.201	0.0160648	0.817796	0.407267	0.863693	0.475513	0	1	0	0	0	Oo
19652	9.46366	10.4331	10.5031	10.4896	10.4661	1.958	1.05	-1.009	-1.016	-1.026	2.5387e-08	0.624525	0.940262	0.896539	0.779088	1	1	1	1	1	Oo
19653	6.4701	6.30511	6.08837	6.26683	6.01732	-0.470667	-0.545667	0.478	-1.19833	-0.391333	0.198956	0.143963	0.280831	0.539895	0.342045	1	0.333333	0.666667	0.333333	0.333333	OoCc
19654	7.90005	7.60833	7.58339	7.70606	7.67395	-0.586	0.312667	1.08933	-0.356333	1.066	0.114811	0.560327	0.663874	0.865176	0.752363	0.666667	1	0.666667	0.666667	0.666667	OoCc
19655	5.86555	4.2597	3.35906	2.57394	2.81981	-3.044	-1.867	-1.723	1.186	-1.453	0.0743878	0.434478	0.534425	0.870532	0.616247	0	1	0	0	0	Oo
19656	8.27315	7.30256	7.702	7.2673	7.07943	-1.96	1.319	-1.352	-1.139	-1.54	3.98777e-06	0.038492	0.028361	0.394627	0.00132077	1	1	1	1	1	Oo
19662	4.87938	4.72601	4.75509	4.92442	4.80008	-1.112	1.02	1.125	-1.09	1.032	0.45454	0.928095	0.559985	0.693002	0.863009	1	0	0	0	0	Oo
19663	5.96998	6.81977	7.23247	7.37378	7.58704	1.89275	0.86975	0.11	0.1865	0.33875	0.153054	0.194021	0.705367	0.448913	0.325139	0.75	0.5	1	1	1	OoCc
19664	8.90728	9.25577	9.55059	9.38164	8.62872	1.296	1.228	-0.141	-1.6855	-1.9295	0.311542	0.174601	0.376557	0.00380914	0.00190369	1	1	1	1	1	Oo
19671	6.72975	7.69694	8.29476	7.88406	7.77703	1.955	1.513	-1.329	-1.077	-1.432	0.000191667	0.0284608	0.147123	0.759937	0.0385251	1	0	1	1	1	Oo
19672	5.24775	3.80173	3.10335	3.73511	3.9285	-2.725	-1.623	1.549	1.143	1.772	0.0316674	0.407221	0.490067	0.863693	0.269042	0	1	0	0	0	Oo
19679	5.78531	6.55513	6.40602	6.11251	6.64218	1.705	-1.109	-1.226	1.444	1.178	0.0110404	0.712157	0.463106	0.174043	0.485109	1	0	1	1	1	Oo
19684	10.6839	10.7886	10.6352	10.7108	10.9034	0.403333	-1.113	0.389333	0.497667	1.22267	0.000782677	0.44048	0.689013	0.171008	0.388763	1	1	1	1	1	Oo
19687	8.10087	7.58822	7.3163	7.40383	7.28879	-1.522	-1.21	-0.261333	-0.426333	-0.353333	0.213111	0.222224	0.577988	0.375883	0.592073	1	1	1	1	1	Oo
19691	6.44134	5.5362	5.56279	5.77174	5.9227	-1.92733	-0.310667	0.500333	1.118	1.30233	0.0236634	0.540893	0.463644	0.646863	0.343099	0.333333	1	0.333333	0.666667	0.666667	Oo
19692	4.90237	5.03942	5.41322	5.63768	6.11586	1.1	1.296	1.168	1.393	1.627	0.601946	0.242188	0.540545	0.168795	0.0181223	0	0	0	1	1	Oo
19697	8.28712	8.99449	8.76416	8.60989	8.97635	1.633	-1.173	-1.113	1.289	1.158	0.00155569	0.372524	0.596452	0.180289	0.362736	1	1	1	1	1	Oo
19698	4.68741	6.257	5.48577	5.63871	5.36327	2.968	-1.707	1.112	-1.21	-1.089	5.33348e-05	0.0473616	0.751452	0.558183	0.755265	1	0	0	0	0	OoMur
19699	9.50064	9.6389	9.17951	8.7688	8.94009	1.101	-1.375	-1.329	1.126	-1.181	0.365197	0.0161852	0.0333088	0.428948	0.163285	1	1	1	1	1	OoCcMur
19704	5.71984	6.32931	6.01549	5.09901	6.63153	1.526	-1.243	-1.888	2.893	1.533	0.419057	0.767405	0.36346	0.127428	0.482912	1	1	0	0	1	Oo
19707	9.76102	9.38466	9.60155	9.86776	10.1152	-1.3025	1.162	1.203	1.187	1.4285	0.0237455	0.153098	0.0868515	0.147587	0.00085938	1	0.5	1	1	1	Oo
19708	8.87019	8.52495	8.34659	7.93158	7.61182	-1.27	-1.132	-1.333	-1.248	-1.664	0.012656	0.280747	0.0144127	0.0748364	5.67766e-05	1	1	1	1	1	Oo
19712	8.84817	9.44327	9.31582	9.26419	8.8317	1.588	-0.111	-0.045	-1.3755	-1.3995	0.13607	0.176315	0.162331	0.376069	0.0358204	1	1	1	1	1	Oo
19714	10.3088	9.63307	9.61636	9.53306	9.54793	-1.597	-1.012	-1.059	1.01	-1.049	7.12805e-05	0.940291	0.688688	0.94985	0.687828	1	1	1	1	1	OoMur
19716	9.67192	7.36618	5.48721	4.90514	5.64222	-4.944	-3.678	-1.497	1.667	1.113	1.58007e-08	4.32779e-06	0.0582656	0.0285516	0.594571	1	1	1	1	1	Oo
19718	8.68401	8.00724	8.04639	8.08905	7.81505	-1.6	0.03	0.0315	-1.2105	-1.1745	0.000941761	0.622404	0.727586	0.343403	0.278262	1	1	1	1	1	OoCc
19720	9.83013	10.4248	10.6641	10.6646	10.7034	1.583	1.18067	0.333667	-0.290667	-0.295333	0.0727763	0.195166	0.784639	0.266525	0.295742	1	1	1	1	1	Oo
19724	8.83294	8.95354	8.33153	8.29787	8.48247	1.087	-1.539	-1.024	1.136	1.11	0.401361	0.00126348	0.888611	0.412667	0.37609	1	1	1	1	1	Oo
19726	4.43828	4.14485	4.74113	4.81932	4.67359	-1.226	1.512	1.056	-1.106	-1.048	0.445918	0.204375	0.89829	0.816894	0.891458	0	0	0	0	1	Oo
19727	5.99935	6.7269	6.57675	6.41681	6.53277	1.6965	-0.1315	-0.129	0.0995	-0.0325	0.0380971	0.272819	0.504667	0.243867	0.627909	0.5	0.5	0.5	0.5	1	OoMur
19729	6.98066	5.73899	5.73499	6.02454	5.79101	-2.365	-1.003	1.222	-1.176	1.04	5.02616e-08	0.985782	0.110614	0.226271	0.75116	1	1	1	1	1	Oo
19730	6.93528	7.34808	7.10856	6.97352	6.53343	1.331	-1.181	-1.098	-1.357	-1.49	0.0145694	0.231756	0.559032	0.0473651	0.00325711	1	0	1	1	1	OoMur
19732	7.23231	8.15937	8.2337	8.23843	8.35488	1.901	1.053	1.003	1.084	1.088	0.000119604	0.799184	0.988212	0.711273	0.618548	1	0	1	1	1	Oo
19733	3.78009	5.40609	6.24669	9.49257	9.27542	3.087	1.791	9.487	-1.162	8.161	0.00162573	0.141331	1.38831e-05	0.771246	1.04845e-05	0	0	1	1	1	Oo
19735	9.03083	11.0649	11.5784	11.7536	11.7147	4.89767	1.43667	1.12967	0.296667	0.440333	0.000329779	0.256925	0.68977	0.637159	0.487316	1	1	1	1	1	Oo
19739	7.11133	7.20376	7.16167	7.32367	7.29488	1.066	-1.03	1.119	-1.02	1.097	0.440354	0.807708	0.302546	0.886537	0.329436	1	1	1	1	1	OoCc
19744	10.5848	10.0804	9.82276	9.8612	9.94239	-1.419	-1.196	1.027	1.058	1.086	0.000297728	0.0789248	0.836401	0.65827	0.388692	1	1	1	1	1	Oo
19746	7.3719	9.03967	9.41549	9.51472	9.56631	3.177	1.298	1.071	1.036	1.11	8.98442e-11	0.0134339	0.564815	0.793467	0.272339	1	0	1	1	1	Oo
19762	4.43665	4.82063	4.6291	5.68478	5.63685	1.305	-1.142	2.079	-1.034	2.011	0.103964	0.539209	0.00106129	0.905579	0.000712178	1	0	0	1	1	Oo
19765	9.54314	10.1606	10.1393	10.3033	10.2469	1.5955	-0.017	1.123	-0.0455	0.093	0.0890787	0.353876	0.576714	0.408235	0.162827	1	1	1	1	1	OoCcMur
19766	8.03315	8.26976	8.27228	8.32892	8.26193	1.1785	0.002	0.062	-0.0505	-0.0105	0.136502	0.674255	0.00860031	0.580725	0.00896311	1	1	1	1	1	Oo
19769	6.16946	5.94887	6.54595	7.17745	6.97578	-1.165	1.5355	1.565	-1.1565	1.348	0.138484	0.0351009	0.00849863	0.467377	0.0137227	0.5	0.5	1	1	1	Oo
19775	6.32519	6.45527	6.46997	6.91472	7.03523	0.612	0.011	1.37075	0.59325	1.51775	0.283265	0.756807	0.148886	0.562632	0.168344	0.5	0.5	1	1	1	Oo
19777	7.95954	7.46569	7.68262	7.87231	7.62521	-0.842	1.166	1.14167	-0.537667	-0.373667	0.000702336	0.42164	0.452897	0.272287	0.171585	1	1	1	1	1	Oo
19819	7.343	8.90896	9.18113	8.80413	8.62153	2.961	1.208	-1.299	-1.135	-1.474	6.36869e-10	0.0867626	0.0228636	0.311499	0.000695484	1	1	1	1	1	Oo
19820	7.9033	7.39111	7.3	7.45601	7.32701	-1.4985	-0.568	0.623	-0.59725	0.516	0.261309	0.674288	0.451495	0.567345	0.451434	0.5	1	0.5	0.75	0.75	Oo
19821	9.28685	9.2977	9.39666	9.38151	9.59504	0.01	1.0725	-0.0115	1.1605	1.1565	0.000782411	0.524251	0.392317	0.161595	0.449409	1	1	1	1	1	Oo
19822	8.31194	8.79478	8.70252	8.73458	8.8136	0.4945	-1.0665	0.0245	1.0565	0.087	0.31424	0.572518	0.421634	0.708372	0.35104	1	0.5	1	1	1	Oo
19823	9.58403	8.24739	7.41151	6.74369	6.84792	-2.5285	-1.7955	-1.6425	1.075	-1.528	8.74773e-06	0.00940573	0.171149	0.764212	0.241591	0.5	1	0.5	0	0	Oo
19826	9.76775	9.06608	9.06291	9.13701	9.17232	-1.69725	-0.50075	0.55475	0.52525	0.582	0.0496217	0.605597	0.615604	0.792223	0.343333	1	0.75	1	1	1	OoCc
19876	5.91002	6.12861	5.20502	5.60309	5.55987	1.164	-1.897	1.318	-1.03	1.279	0.410243	0.00665558	0.248823	0.922102	0.234843	1	1	1	1	1	Oo
19877	9.63642	9.30349	9.10385	9.43188	9.42712	-0.8585	-0.65375	1.2685	-0.0135	0.79625	0.0688118	0.393312	0.226191	0.124125	0.309934	1	1	1	1	1	Oo
19878	6.35932	6.21101	5.79874	5.61591	5.55515	-1.108	-1.331	-1.135	-1.043	-1.184	0.49856	0.118761	0.553634	0.869597	0.327489	1	1	1	0	0	Oo
19883	4.66658	5.48641	6.4207	6.52817	6.38251	1.6765	2.342	1.078	-0.11525	-0.032	0.393068	0.362331	0.85562	0.738106	0.579928	0.5	0	0.5	0.25	1	OoCcMur
19889	7.05112	5.69542	5.58654	6.18313	5.45437	-2.559	-1.078	1.512	-1.657	-1.096	0.000101111	0.816497	0.10401	0.0805803	0.733944	0	1	0	0	0	OoCc
19891	7.3946	7.4015	7.61556	7.73097	7.47099	0.0055	0.188	0.09	-1.2115	-0.1315	0.517591	0.389302	0.65473	0.512258	0.224243	1	0	1	1	1	Oo
19893	8.08851	5.78842	5.74684	5.0746	5.93091	-4.925	-1.029	-1.594	1.81	1.136	4.44748e-08	0.919825	0.0423467	0.019688	0.55205	1	1	1	1	1	Oo
19894	8.77415	9.65577	9.75536	10.2718	10.61	1.842	1.071	1.43	1.264	1.808	7.0703e-06	0.651103	0.00696349	0.118307	3.56046e-05	1	0	1	1	1	Oo
19895	9.61615	9.0087	8.84209	8.88046	8.84921	-1.524	-1.122	1.027	-1.022	1.005	2.82267e-05	0.24433	0.830105	0.871943	0.962918	1	1	1	1	1	Oo
19896	11.294	10.621	10.2535	10.241	10.1585	-1.594	-1.29	-1.009	-1.059	-1.068	2.84961e-05	0.021152	0.954664	0.676458	0.529146	1	1	1	1	1	Oo
19899	10.0608	8.73563	8.59831	8.5963	8.67584	-2.57933	-1.10067	-0.334333	0.392	0.393667	3.00526e-05	0.508117	0.734165	0.657195	0.51342	1	1	1	1	1	OoMur
19921	10.7722	9.83349	9.93067	9.80967	10.1049	-1.917	1.07	-1.087	1.227	1.128	1.25278e-05	0.669625	0.61591	0.18987	0.362903	1	1	1	1	1	Oo
19933	9.20806	8.44288	8.23199	8.30918	8.45396	-1.75267	-1.17133	-0.265	0.451	1.16933	0.0836727	0.54389	0.490261	0.163894	0.321492	0.666667	0.666667	0.666667	0.666667	1	Oo
19934	10.3913	9.79203	9.53333	9.47941	9.51569	-1.05	-1.20733	-1.03833	0.361	-0.345667	0.01303	0.435008	0.788593	0.660448	0.463753	1	0.666667	1	1	1	Oo
19935	9.61531	8.46434	8.28547	7.90618	8.0237	-2.221	-1.132	-1.301	1.085	-1.199	1.86465e-07	0.332651	0.0401513	0.591287	0.111169	1	1	1	1	1	Oo
19941	11.1219	9.50099	9.35741	9.27668	9.19785	-3.161	-1.105	-1.0585	-1.057	-1.117	7.56815e-07	0.551619	0.77704	0.772084	0.449446	1	1	1	1	1	Oo
19942	9.75829	8.41241	8.22101	8.13066	8.62655	-2.83033	-1.142	-0.401	0.807333	0.708	0.00999873	0.360145	0.557281	0.237281	0.095896	1	1	1	1	1	Oo
19943	10.7836	10.5936	10.3092	10.2242	10.5561	-1.141	-1.218	-1.061	1.259	1.187	0.269597	0.177924	0.746166	0.150802	0.20503	1	1	1	1	1	Oo
19951	11.6023	10.2115	9.94283	9.83935	9.94554	-2.622	-1.205	-1.074	1.076	1.002	4.96071e-07	0.28016	0.727405	0.762353	0.9919	1	1	1	1	1	Oo
19981	8.2945	7.56739	7.28964	7.21173	7.15002	-1.43833	-1.21267	-0.394	-0.378333	-1.10467	8.49894e-05	0.340034	0.589347	0.87425	0.58401	0.666667	0.333333	0.666667	1	0.666667	Oo
19982	9.04389	7.46043	7.42929	7.51354	7.56501	-2.997	-1.022	1.06	1.036	1.099	5.22277e-08	0.913469	0.762868	0.868876	0.527186	1	1	1	1	1	Oo
19988	11.3951	10.2466	10.2721	10.1028	10.1564	-2.217	1.018	-1.124	1.038	-1.083	3.09486e-07	0.914716	0.413644	0.832803	0.516062	1	1	1	1	1	Oo
19989	10.5982	9.26668	9.10555	8.99281	8.82639	-2.63033	-1.11833	-1.083	-0.46	-0.559667	3.51483e-07	0.372799	0.564513	0.422921	0.321068	1	1	1	1	1	Oo
20005	10.0266	8.92173	8.36679	7.77944	7.65725	-2.33167	-1.472	-1.52733	-0.437333	-1.71867	0.138358	0.208395	0.265181	0.61229	0.313729	1	0.666667	0.666667	0.666667	0.666667	OoCc
20014	8.2818	7.47464	7.12037	6.69167	7.2543	-1.75	-1.278	-1.346	1.477	1.097	8.97086e-05	0.0886902	0.0472914	0.0191749	0.503617	1	1	1	0	1	Oo
20016	8.11061	6.42262	6.42917	5.95534	5.45985	-3.529	0.0045	-1.401	-1.411	-1.9665	4.54541e-05	0.977001	0.174961	0.0554555	0.0011638	1	0.5	1	0.5	0.5	Oo
20017	6.55758	6.32357	6.14633	6.01139	6.33964	-1.176	-1.131	-1.098	1.255	1.143	0.370488	0.614203	0.732267	0.366706	0.528855	1	0	1	0	0	Oo
20018	9.20668	9.99797	10.3493	10.499	10.5038	1.43575	1.28775	1.11575	0.00375	0.61575	0.127406	0.292135	0.627559	0.504037	0.480007	1	0.75	1	1	1	Oo
20019	6.14686	6.74127	6.67013	6.81488	7.01405	1.572	-1.0505	1.106	1.1525	1.2765	0.112776	0.746792	0.513429	0.451953	0.164116	1	0	0.5	0	0.5	OoCcMur
20020	8.66664	7.50795	6.86371	6.67693	6.98666	-2.233	-1.563	-1.138	1.239	1.089	1.53697e-06	0.00432587	0.433022	0.184968	0.548103	1	1	0	0	0	Oo
20021	8.75893	10.5211	10.9954	10.9676	10.75	3.392	1.389	-1.019	-1.163	-1.185	2.27539e-12	0.000544365	0.855415	0.0983127	0.0278322	1	1	1	1	1	Oo
20022	10.2398	10.8715	10.7507	10.4497	10.245	1.549	-1.087	-1.232	-1.152	-1.42	6.52895e-05	0.47437	0.0676735	0.245975	0.00156496	1	1	1	1	1	Oo
20024	9.16039	8.62056	8.16802	7.74276	7.37792	-1.5185	-1.4115	-1.3625	-1.312	-1.8465	0.183363	0.343532	0.249022	0.465	0.0270579	0.5	1	0.5	0.5	0.5	Oo
20042	11.8246	10.8161	10.8709	10.926	11.1467	-2.012	1.039	1.039	1.165	1.211	9.70368e-08	0.748517	0.767647	0.1789	0.0454367	1	1	1	1	1	Oo
20044	11.6212	11.4791	11.2064	10.9006	11.1723	-1.103	-1.208	-1.236	1.207	-1.024	0.339333	0.132831	0.105856	0.175074	0.85757	1	1	1	1	1	Oo
20054	10.1034	8.96294	8.92004	8.8473	8.8079	-2.2355	-1.0305	-1.052	-0.0285	-1.082	5.48956e-05	0.877192	0.785801	0.822726	0.621916	1	0.5	1	1	1	OoMur
20068	9.9388	8.85787	8.93954	9.11476	9.31973	-2.19467	0.394833	0.7985	0.842	1.00167	0.169444	0.481827	0.506888	0.427145	0.111287	1	0.833333	1	1	1	Oo
20084	11.5957	10.4305	10.1323	9.77047	9.97847	-2.255	-1.2335	-1.2855	1.155	-1.1125	5.6805e-07	0.207604	0.0696809	0.340243	0.400132	1	1	1	1	1	Oo
20085	9.58775	8.31955	7.71265	7.48972	7.72686	-2.409	-1.523	-1.167	1.179	1.01	5.77759e-07	0.00713467	0.342296	0.329519	0.951251	1	1	1	1	1	Oo
20088	8.84022	6.98746	6.64125	6.41874	6.63027	-3.6356	-0.9248	-0.1028	1.163	0.5382	0.00523125	0.472237	0.607524	0.618944	0.338056	0.8	1	0.8	0.8	0.8	OoCc
20090	11.8026	11.1602	11.0485	11.0793	11.2153	-1.563	-1.08067	0.355667	1.10167	1.12567	0.000395902	0.523941	0.839116	0.490047	0.369909	1	1	1	1	1	Oo
20102	11.6536	10.8723	11.067	11.1385	11.3125	-1.719	1.145	1.051	1.128	1.186	6.07788e-05	0.334367	0.769536	0.444432	0.172304	1	1	1	1	1	Oo
20103	11.6802	11.0568	10.9703	10.8839	10.9279	-1.54	-1.062	-1.062	1.031	-1.03	0.000602853	0.697403	0.719566	0.870949	0.835332	1	1	1	1	1	Oo
20111	7.6775	7.47591	7.65258	7.34792	7.11963	-1.15	1.13	-1.235	-1.171	-1.447	0.327949	0.513833	0.259638	0.436611	0.0239023	1	1	1	1	1	Oo
20115	10.5453	9.7081	9.34576	9.37359	9.6476	-1.853	-1.29133	-0.311333	0.567333	0.614	0.00757484	0.124091	0.734204	0.440359	0.391439	1	1	1	1	1	Oo
20116	10.9669	9.90818	9.88544	9.81878	9.7698	-2.13733	-0.346333	-0.383333	-0.369667	-0.426333	2.99352e-06	0.190631	0.643025	0.592537	0.239613	1	1	1	1	1	Oo
20128	7.78594	8.11032	7.69003	7.30579	6.78475	1.252	-1.338	-1.305	-1.435	-1.873	0.173966	0.149038	0.215194	0.104498	0.00194061	1	1	1	0	0	Oo
20129	5.24286	5.39772	5.40326	5.34254	5.28992	0.129	0.004	-0.045	-1.0375	-1.0825	0.387016	0.814911	0.797965	0.905407	0.71035	0	1	0	0	0.5	Oo
20130	7.57685	6.16757	5.49274	5.41423	5.43899	-2.656	-1.596	-1.056	1.017	-1.038	2.09852e-07	0.00417644	0.775484	0.935951	0.815217	0	1	0	0	0	OoCc
20132	3.30351	4.74044	5.08976	6.82227	7.08012	2.707	1.274	3.323	1.196	3.973	0.0028087	0.554577	0.00320174	0.7083	0.000461431	0	0	0	0	1	Oo
20133	6.93995	6.85146	7.01352	6.90672	7.11976	-0.0735	1.1235	-1.079	1.159	1.078	0.18553	0.527261	0.664306	0.394971	0.652671	1	0.5	1	1	1	OoCc
20135	7.8804	8.01589	8.54233	8.48788	8.61877	0.145	1.446	-0.0425	0.1055	1.0545	0.00138048	0.0153749	0.390866	0.39003	0.652939	1	1	1	1	1	Oo
20148	4.42889	5.88589	6.39745	6.51012	6.43772	2.745	1.426	1.081	-1.051	1.028	1.76628e-06	0.057478	0.73511	0.846581	0.887864	0	0	1	0	1	OoCc
20163	8.68781	8.09304	7.86283	7.37781	7.5681	-1.51	-1.173	-1.4	1.141	-1.227	0.00275782	0.317612	0.0363453	0.469963	0.152904	1	1	1	1	1	Oo
20168	7.90064	8.00869	7.37174	7.02736	7.5461	0.0975	-1.5895	-1.27	1.4445	0.1375	0.0285139	0.027026	0.0484217	0.0408102	0.488949	1	1	1	0.5	1	Oo
20174	7.73017	9.42667	9.86146	9.77718	9.35608	3.241	1.352	-1.06	-1.339	-1.419	3.21383e-09	0.0271413	0.724911	0.0524897	0.00691019	1	0	1	1	1	Oo
20184	8.62248	8.76747	8.85765	8.75944	8.87707	1.106	1.065	-1.07	1.085	1.014	0.131561	0.469633	0.459871	0.382809	0.875592	1	1	1	1	1	OoCcMur
20185	7.42685	7.37799	7.02877	7.14811	7.0512	0.267	-1.27867	1.08767	-0.407333	-0.311333	0.156324	0.211784	0.695357	0.308176	0.365204	1	0.666667	0.666667	0.666667	0.666667	OoCcMur
20187	4.59091	7.52569	6.95525	7.29387	7.89467	7.646	-1.485	1.265	1.517	1.918	4.31477e-09	0.0955366	0.369237	0.111801	0.00492653	0	0	0	0	1	Oo
20192	7.19769	5.4593	4.73896	4.5216	5.01009	-3.337	-1.648	-1.163	1.403	1.207	9.27874e-07	0.0204327	0.5394	0.144431	0.344194	0	1	0	0	0	Oo
20195	6.36834	6.10127	5.73014	6.14193	6.24592	-1.203	-1.293	1.33	1.075	1.43	0.256298	0.199925	0.176652	0.784753	0.0527977	1	1	0	1	1	Oo
20218	7.33306	6.64183	6.66801	6.80931	6.64913	-1.6935	0.02225	1.10425	-0.62125	-0.0135	0.180309	0.412085	0.635346	0.538028	0.535756	0.75	1	1	1	1	Oo
20220	7.18656	6.27999	5.59779	5.30857	5.00892	-1.875	-1.605	-1.222	-1.231	-1.504	0.000312162	0.0126838	0.31466	0.319177	0.0184194	0	1	0	0	0	Oo
20222	8.25072	8.41146	8.24061	8.25396	8.42032	0.158	-1.1305	1.009	0.13	1.1405	0.0258038	0.502934	0.959844	0.569029	0.51884	1	1	1	1	1	Oo
20224	6.63688	7.11753	7.19664	7.25118	7.75708	1.395	1.056	1.039	1.42	1.475	0.0302777	0.80062	0.874421	0.0837251	0.023602	1	0	0	1	1	Oo
20226	8.63599	8.56661	8.45629	8.28978	8.3854	-1.0495	-0.0875	-1.1235	0.0715	-0.055	0.608459	0.341157	0.348441	0.589865	0.31958	1	1	1	1	1	Oo
20227	7.51768	8.28531	8.19722	8.33856	8.48771	1.702	-1.063	1.103	1.109	1.223	3.54534e-06	0.592998	0.394637	0.386983	0.0370088	1	1	1	1	1	Oo
20229	5.75297	5.86888	6.41955	5.82546	5.97317	1.084	1.465	-1.51	1.108	-1.363	0.572997	0.0284412	0.0213031	0.630189	0.0516756	0	1	1	0	1	Oo
20230	8.79193	8.10594	8.25118	9.05293	9.36882	-1.625	1.1075	1.7725	1.247	2.2355	0.00169824	0.461473	0.00140726	0.136136	2.42428e-05	1	1	1	1	1	OoCcMur
20238	7.52742	8.74229	9.17903	9.27533	8.77198	2.321	1.354	1.069	-1.418	-1.326	4.51978e-08	0.0133922	0.642402	0.0134394	0.0122737	0	0	0	1	1	OoMur
20239	7.38461	7.67011	7.49677	7.86074	7.97432	0.33025	-0.637	1.2935	0.58525	1.40325	0.16048	0.270803	0.221817	0.656288	0.0863626	0.75	0.75	0.5	0.75	0.75	Oo
20250	6.03743	4.3144	4.47022	4.79733	5.16478	-3.34	1.1155	1.263	1.2945	1.65	5.49628e-06	0.707177	0.420986	0.365036	0.142508	0	1	0	0	1	Oo
20255	5.51917	8.94451	9.37432	9.33768	9.07812	10.743	1.347	-1.026	-1.197	-1.228	3.56132e-12	0.0731831	0.909156	0.342748	0.182561	1	0	1	1	1	Oo
20259	4.32517	4.5786	6.92938	8.15331	8.35016	1.192	5.101	2.336	1.146	2.677	0.320479	5.95263e-07	0.000588856	0.607888	5.51289e-05	0	0	1	1	1	Oo
20262	4.82639	4.04053	4.9995	5.00285	5.32835	-1.724	1.944	1.002	1.253	1.256	0.0490188	0.0470364	0.996662	0.579127	0.473621	0	1	0	0	1	Oo
20280	8.75292	7.2641	7.24379	7.23546	7.10313	-2.979	-1.0145	-0.0065	-0.109	-0.1295	1.07295e-06	0.955079	0.542617	0.410958	0.166533	1	1	1	1	1	Oo
20286	8.48512	9.31158	8.76299	9.55931	9.91112	1.773	-1.463	1.737	1.276	2.216	0.000331344	0.0278229	0.00238573	0.239084	3.34957e-05	1	1	1	1	1	Oo
20289	7.4262	8.08094	7.93752	7.9877	7.7439	1.574	-1.105	1.035	-1.184	-1.144	0.0540946	0.786187	0.928421	0.682808	0.656731	1	1	1	1	1	Oo
20296	4.85611	4.63889	5.89969	6.22558	6.24256	-1.162	2.396	1.253	1.012	1.268	0.494862	0.00257063	0.45495	0.975933	0.343136	0	0	0	1	1	Oo
20310	3.59366	3.81781	4.11038	4.17432	4.43862	1.168	1.225	1.045	1.201	1.255	0.271422	0.24719	0.840677	0.351402	0.153502	0	0	0	0	1	Oo
20312	5.31144	6.13503	5.83591	6.18385	6.08071	1.77	-1.23	1.273	-1.074	1.185	0.000870471	0.276252	0.226311	0.769856	0.333468	1	0	0	0	1	OoMur
20316	8.25954	9.74089	9.95339	10.0705	10.0109	2.792	1.159	1.085	-1.042	1.041	3.10801e-10	0.137901	0.471516	0.748171	0.686827	1	1	1	1	1	Oo
20318	7.60831	7.29861	7.14788	6.94213	6.72717	-1.239	-1.11	-1.153	-1.161	-1.339	0.0743285	0.503416	0.373338	0.371166	0.0318347	1	1	1	1	1	OoMur
20320	8.77713	9.09724	9.00646	9.55383	9.82178	1.248	-1.065	1.461	1.204	1.76	0.0312526	0.64536	0.00416811	0.169849	4.94681e-05	1	1	1	1	1	Oo
20322	6.3678	5.11918	5.25281	5.29114	5.21816	-2.376	1.097	1.027	-1.052	-1.024	3.35819e-07	0.543564	0.884996	0.785471	0.87074	0	1	0	0	0	Oo
20333	8.1804	8.63813	8.14704	8.291	8.25292	1.373	-1.405	1.105	-1.027	1.076	0.00160781	0.00426409	0.425963	0.866177	0.492615	1	1	1	1	1	Oo
20334	9.59489	9.11024	8.539	8.4604	8.76365	-1.399	-1.486	-1.056	1.234	1.168	0.0109742	0.0126687	0.777268	0.218665	0.277403	1	1	1	1	1	Oo
20335	8.94351	8.77746	8.98407	9.15801	8.93494	-1.122	1.154	1.128	-1.167	-1.035	0.318699	0.325617	0.450057	0.334	0.816519	1	0	1	1	1	Oo
20336	8.14008	7.18508	6.78088	6.92023	7.21279	-1.96533	-1.33	1.10333	1.22667	1.357	0.00387648	0.153523	0.548212	0.260316	0.13783	1	1	0.666667	0.666667	1	Oo
20338	10.6197	10.0788	9.84506	10.009	10.1308	-1.455	-1.176	1.12	1.088	1.219	3.02397e-05	0.0711945	0.228056	0.461903	0.0179995	1	1	1	1	1	OoMur
20340	7.9159	7.55587	7.40354	7.20653	6.60736	-1.29633	-0.454	-0.492333	-1.54433	-1.84367	0.126523	0.238278	0.452898	0.0415557	0.0255649	1	0.666667	1	0.666667	0.666667	Oo
20344	2.75376	3.15049	4.40305	8.1172	7.78758	1.347	2.389	21.8435	-0.323	13.603	0.560725	0.0914534	9.95372e-06	0.61246	2.25269e-05	0	0	0	1	0.5	Oo
20352	7.90977	7.54998	7.59816	7.03365	6.82078	-1.283	1.034	-1.479	-1.159	-1.714	0.194611	0.911899	0.110066	0.609591	0.0153069	1	1	1	1	1	Oo
20353	7.03013	7.53245	7.43845	7.56102	7.63439	1.416	-1.067	1.089	1.052	1.145	0.0358598	0.801994	0.739044	0.884056	0.498292	0	0	0	0	1	Oo
20354	7.8726	8.79883	8.59448	8.38259	8.51686	1.9	-1.152	-1.158	1.098	-1.055	1.30538e-06	0.225016	0.234211	0.497389	0.637062	1	1	1	1	1	OoMur
20356	6.24152	6.98285	6.83232	7.56103	7.71646	1.8215	-0.1215	1.7375	1.115	1.911	0.343317	0.603476	0.147305	0.683501	0.0158145	0.5	0.5	1	1	1	OoCc
20357	5.74696	4.99819	5.19111	5.41059	5.09043	-1.68	1.143	1.164	-1.248	-1.072	0.000350072	0.407736	0.368119	0.191955	0.646011	0	1	0	0	0	Oo
20360	7.36919	7.90117	7.63235	7.84014	7.57157	1.446	-1.205	1.155	-1.205	-1.043	0.0103331	0.274928	0.446361	0.32714	0.808126	1	0	1	1	1	Oo
20363	8.73793	3.83816	2.48656	4.26011	5.2655	-29.852	-2.552	3.419	2.007	6.863	1.15713e-09	0.0120541	0.00194954	0.0812149	9.4997e-06	0	1	0	0	0	OoCc
20364	8.37942	9.85535	9.76692	9.87676	9.52236	3.0755	-1.0645	1.079	-1.2865	-1.192	9.44228e-07	0.63489	0.643414	0.171307	0.331565	1	0.5	1	1	1	Oo
20365	7.95343	5.72787	4.61512	4.18067	4.98655	-4.677	-2.163	-1.351	1.748	1.294	3.31361e-07	0.00395657	0.261646	0.0460151	0.268272	1	1	0	0	1	Oo
20379	6.57446	6.46301	6.69772	6.72781	6.44473	-1.08	1.177	1.021	-1.217	-1.192	0.519337	0.269681	0.914694	0.221812	0.189645	0	1	0	0	0	OoCcMur
20382	7.29983	7.29154	7.41552	7.28166	7.34696	-0.0075	0.104	-1.097	0.0475	-0.0505	0.20378	0.433665	0.721164	0.86347	0.801273	0.5	0.5	0.5	0.5	1	Oo
20383	7.94883	6.64323	6.48909	6.50561	6.46034	-2.503	-0.783333	0.6535	-0.0438333	0.256667	0.0409356	0.617398	0.482018	0.452768	0.219028	1	1	1	0.833333	0.833333	Oo
20384	9.3822	8.68743	8.16833	7.74964	7.97635	-1.619	-1.433	-1.337	1.17	-1.142	0.00586564	0.0721727	0.170737	0.511347	0.489057	1	0	1	1	1	Oo
20393	4.97867	6.10295	5.94649	5.38767	4.44204	2.18	-1.115	-1.473	-1.926	-2.837	0.000213154	0.657757	0.0893621	0.0108451	3.46963e-05	1	0	1	0	0	OoCc
20402	7.32379	7.06778	6.74797	6.18785	6.83032	-0.3665	-1.2635	-0.7445	1.591	0.0875	0.000469564	0.43049	0.0408715	0.068031	0.085297	1	1	0.5	0.5	0.5	OoCc
20403	7.80614	6.97549	6.98604	7.28211	7.11412	-2.19867	-0.298667	0.594333	-0.472667	0.438	1.06697e-06	0.187717	0.364297	0.22451	0.349965	1	0.666667	1	1	1	OoCc
20404	6.74923	5.6415	5.62568	5.7993	6.00198	-2.44933	-0.344333	0.474333	0.499333	1.32467	0.223513	0.715875	0.477935	0.472503	0.455392	0	1	0	0	0.333333	Oo
20405	6.10357	7.16223	7.55199	7.38087	7.63471	2.083	1.31	-1.126	1.192	1.059	8.5091e-08	0.0142792	0.306268	0.134618	0.583727	1	0	1	1	1	OoCc
20408	9.02177	7.26783	6.07361	5.44113	4.32598	-3.373	-2.288	-1.55	-2.166	-3.358	6.90951e-05	0.0095171	0.176744	0.027008	0.00023287	0	1	0	0	0	Oo
20409	5.80745	7.78168	7.90931	7.4743	6.83023	3.929	1.092	-1.352	-1.563	-2.113	8.93316e-10	0.571974	0.0416858	0.00841307	1.1727e-05	1	1	1	1	1	OoCc
20411	7.62817	9.03165	9.14249	9.27224	9.33552	2.764	0.42	1.09733	0.383	1.14833	0.00239771	0.3791	0.701581	0.540065	0.457761	1	0.666667	1	1	1	OoMur
20418	9.26478	8.04786	7.67457	8.01094	7.88806	-2.324	-1.295	1.263	-1.089	1.159	1.64744e-05	0.185799	0.247166	0.763717	0.426024	1	1	1	1	1	Oo
20419	7.49116	8.27082	9.12883	9.31952	9.43698	1.717	1.813	1.141	1.085	1.238	0.000397609	0.00108074	0.472608	0.690806	0.153277	1	1	1	1	1	Oo
20422	10.2644	9.18095	9.09182	9.021	9.11059	-2.5945	-1.065	-1.05	0.0775	0.016	0.152927	0.642173	0.744901	0.152765	0.0568623	1	1	1	1	1	Oo
20423	7.21519	7.86826	9.51906	8.51159	8.36317	1.573	3.14	-2.01	-1.108	-2.228	0.00423918	4.21928e-06	0.000553541	0.700784	6.47434e-05	0	0	1	0	0	Oo
20425	6.68053	6.3387	6.6025	5.03751	4.92672	-1.267	1.201	-2.959	-1.08	-3.195	0.0896868	0.292226	4.26229e-06	0.723825	4.95017e-07	0	0	1	0	0	OoMur
20429	6.47298	8.11733	7.7916	7.52035	7.02508	3.126	-1.253	-1.207	-1.41	-1.701	3.88268e-07	0.257042	0.364916	0.121923	0.00386823	1	0	0	0	0	Oo
20430	11.3894	10.7093	10.5953	10.6265	10.4952	-1.6325	-1.0825	1.022	-0.101	-0.076	0.0010601	0.461027	0.86388	0.507994	0.443712	1	1	0.5	0.5	0.5	Oo
20437	7.36311	8.12592	8.39923	8.30969	7.92952	1.93233	0.559333	-0.401	-0.676333	-0.797333	0.323422	0.416742	0.57205	0.200588	0.0620642	1	1	1	1	1	Oo
20439	6.90423	10.3746	10.5383	10.8852	10.9062	11.224	1.12	1.2795	0.0155	1.3105	2.07875e-14	0.323621	0.129863	0.624156	0.224953	1	0.5	1	1	1	Oo
20440	6.51715	7.3318	7.61312	7.78851	7.71206	1.8855	0.2515	1.1365	-0.06	1.071	0.0934731	0.409611	0.58956	0.594677	0.711085	1	0.5	1	1	1	Oo
20441	6.66558	6.6273	6.72866	7.15172	7.03356	-1.027	1.073	1.341	-1.085	1.235	0.887566	0.778396	0.197615	0.769856	0.28996	1	0	0	1	1	Oo
20447	1.13274	3.40278	4.45851	6.13564	5.85439	4.823	2.079	3.198	-1.215	2.631	3.37054e-05	0.0499985	0.0038018	0.677649	0.00693287	0	0	0	1	1	Oo
20449	3.03223	3.66843	5.15119	5.92865	5.4206	1.6235	2.7975	1.7225	-1.4265	1.2055	0.264407	0.000874541	0.0717619	0.264276	0.474502	0	0	0	1	0.5	OoMur
20450	5.27524	5.4291	5.27524	5.32767	5.17541	1.113	-1.113	1.037	-1.111	-1.072	0.603158	0.704447	0.912316	0.740148	0.784214	0	1	0	0	0	Oo
20451	6.18011	6.40694	6.48138	6.41276	6.57383	1.17	1.053	-1.049	1.118	1.066	0.383504	0.862575	0.877441	0.733734	0.79516	0	1	0	1	0	Oo
20454	7.0297	6.79368	6.82461	7.22266	7.45949	-1.1785	0.0225	1.321	0.203	1.5675	0.172134	0.732961	0.0682512	0.418089	0.0151704	0.5	1	0.5	1	1	Oo
20460	5.84307	5.7082	5.81888	5.746	5.81947	-1.098	1.08	-1.052	1.052	1	0.471615	0.66295	0.79945	0.808919	0.997759	1	0	0	0	1	Oo
20462	7.96348	7.78704	7.78425	7.94048	7.95167	-0.482667	-0.334667	0.472	0.340667	0.464333	0.143693	0.703408	0.35217	0.634208	0.543417	0.666667	1	0.666667	0.666667	0.666667	Oo
20463	10.485	10.3635	10.1997	9.96007	9.68684	-1.08967	-1.12267	-1.18067	-1.20867	-1.427	0.429056	0.346161	0.132457	0.119508	0.00247852	1	1	1	1	1	Oo
20466	8.48114	9.39504	9.15556	9.03663	9.03189	1.96733	-0.544333	-0.427333	0.227667	0.138333	0.0420333	0.0999086	0.514686	0.0748471	0.152931	1	1	1	1	1	Oo
20467	10.5907	10.4097	10.0627	9.56465	9.35682	-0.64925	-1.27575	-0.96625	-0.66575	-1.26525	0.354099	0.0812944	0.0881964	0.141273	0.00623122	1	0.5	1	1	1	Oo
20469	6.02335	7.50206	7.46503	7.20953	6.78053	2.787	-1.026	-1.194	-1.346	-1.607	9.44556e-07	0.911577	0.371113	0.132161	0.00638423	1	0	1	1	1	Oo
20473	5.52305	5.24814	5.56095	5.86649	5.61876	-1.21	1.242	1.236	-1.187	1.041	0.35447	0.411531	0.456739	0.575435	0.880412	0	1	0	1	1	Oo
20479	10.5059	9.60988	9.74081	9.4612	8.59648	-1.861	1.095	-1.214	-1.821	-2.21	0.000405451	0.663881	0.343382	0.00715964	0.00011395	1	1	1	1	1	OoCcMur
20480	6.04299	5.92489	6.02292	6.14121	6.12096	-0.111	1.0705	1.0855	-0.0165	0.08	0.0773886	0.761095	0.692198	0.462782	0.399316	0.5	0.5	0.5	0.5	0.5	Oo
20481	8.6971	10.7079	10.1967	10.1089	10.1182	4.1415	-1.425	-0.0755	0.007	-0.076	1.53628e-08	0.0414287	0.262517	0.596881	0.0409935	1	1	1	1	1	Oo
20482	6.8807	4.67888	4.79063	4.61261	4.92956	-4.601	1.081	-1.131	1.246	1.101	1.11413e-06	0.811582	0.711475	0.494944	0.725257	0	1	0	0	0	Oo
20492	9.00212	11.8195	11.946	11.7593	11.8527	7.049	1.092	-1.138	1.067	-1.067	4.19429e-15	0.307712	0.141051	0.518034	0.415264	1	1	1	1	1	Oo
20496	8.40295	7.90504	7.77738	7.30767	6.81195	-0.818	-0.433	-1.39433	-1.42067	-1.97867	0.250784	0.331966	0.185474	0.113654	0.00639134	1	1	1	1	1	Oo
20499	7.07378	7.01112	6.99682	6.96857	7.00418	-0.051	-0.011	-0.0225	0.025	0.0055	0.21037	0.474275	0.419893	0.875637	0.459638	0.5	1	0.5	0.5	0.5	OoCcMur
20501	5.91487	6.76996	6.34239	5.21483	4.3332	1.809	-1.345	-2.185	-1.842	-4.026	0.000832544	0.123546	0.000435097	0.00764248	2.65712e-07	1	1	1	0	0	Oo
20502	5.76052	5.84244	5.15882	5.46259	5.7599	1.058	-1.606	1.234	1.229	1.517	0.640635	0.00266827	0.170465	0.20033	0.00357884	1	1	0	0	1	Oo
20505	5.31959	5.25195	5.65322	6.15708	6.16789	-1.048	1.321	1.418	1.008	1.429	0.700485	0.0557196	0.0208092	0.971528	0.0101604	1	0	0	1	1	Oo
20509	6.58124	7.54993	7.36131	7.1282	7.10111	1.957	-1.14	-1.175	-1.019	-1.198	1.12258e-05	0.386567	0.299603	0.923977	0.17548	1	0	1	0	1	OoCcMur
20510	4.41127	4.50149	4.29023	4.04284	4.32158	1.065	-1.158	-1.187	1.213	1.022	0.815355	0.678744	0.651122	0.617307	0.948956	0	0	0	0	1	Oo
20511	8.19528	8.23551	8.40737	8.53495	8.51741	1.028	1.127	1.092	-1.012	1.079	0.794342	0.390728	0.552148	0.963102	0.557441	1	1	1	1	1	Oo
20515	7.08189	6.79971	6.2212	6.1862	6.16967	-0.288	-1.612	-0.361	0.315333	0.286667	0.336252	0.300116	0.518081	0.645976	0.520093	0.333333	1	0.666667	0.333333	0.666667	Oo
20516	6.59611	6.96045	7.30041	7.30216	7.25536	0.3675	1.266	0.0015	-0.0345	-0.038	0.160317	0.147047	0.405247	0.785976	0.196886	0.5	1	1	1	1	Oo
20519	2.87615	5.34051	5.39044	5.42851	5.68326	5.519	1.035	1.027	1.193	1.225	7.41925e-07	0.927808	0.949617	0.627784	0.471196	0	0	0	0	1	Oo
20520	6.59286	7.21047	7.10537	7.12941	7.58547	1.534	-1.076	1.017	1.372	1.395	0.00633598	0.725912	0.948123	0.111407	0.046418	1	1	1	1	1	Oo
20523	9.61481	9.1906	9.04539	8.97366	8.71876	-1.342	-1.106	-1.051	-1.193	-1.254	0.0282286	0.563836	0.804484	0.328461	0.123027	1	1	1	1	1	Oo
20524	5.97458	6.45895	6.83165	6.76385	6.89197	1.399	1.295	-1.048	1.093	1.043	0.0697082	0.256	0.872092	0.760876	0.858357	0	0	1	1	1	Oo
20525	6.38273	7.1315	7.65292	7.389	7.57776	1.82733	1.436	-1.202	1.14067	-0.390333	0.225732	0.0255888	0.308787	0.493744	0.690637	1	0.666667	1	1	1	OoCcMur
20530	6.8084	7.61315	7.80022	7.73424	7.79017	1.747	1.138	-1.047	1.04	-1.007	9.43112e-05	0.393822	0.802348	0.847697	0.964503	1	0	1	1	1	Oo
20534	8.00685	8.43671	8.54277	8.73792	8.89162	1.347	1.076	1.145	1.112	1.274	0.00314816	0.554596	0.270069	0.420832	0.023602	1	1	1	1	1	Oo
20535	5.41364	6.16726	6.2578	6.25008	6.74054	1.686	1.065	-1.005	1.405	1.397	7.08077e-05	0.671652	0.976964	0.0242524	0.00833208	1	0	1	1	1	Oo
20538	7.72024	7.36005	7.47041	7.41472	7.50709	-1.29	0.0865	-1.0395	0.069	0.027	0.132181	0.525834	0.892693	0.844897	0.802561	0	1	0.5	0.5	0.5	Oo
20539	6.29708	7.47373	5.92555	5.52042	6.54793	2.261	-2.924	-1.324	2.039	1.539	0.0224341	0.013778	0.570621	0.12489	0.273284	1	0	0	0	0	Oo
20540	4.67398	5.95134	6.22853	6.33869	6.24402	2.424	1.212	1.079	-1.068	1.011	2.45069e-05	0.364789	0.764754	0.809395	0.961573	0	0	0	1	1	OoMur
20544	6.17607	7.96757	7.95073	7.81622	8.31192	3.462	-1.012	-1.098	1.41	1.284	6.48182e-08	0.960899	0.664108	0.0808066	0.126233	1	0	1	1	1	Oo
20585	5.92347	6.71022	7.11112	6.44279	6.8319	1.725	1.32	-1.589	1.31	-1.214	8.36567e-05	0.0484987	0.00249188	0.0820392	0.133578	1	1	1	1	1	OoCc
20586	8.35206	8.39555	7.77495	7.56886	7.82266	0.033	-1.5565	-1.155	1.1925	0.0355	0.403255	0.012574	0.377591	0.272422	0.619608	1	1	1	1	1	Oo
20587	7.31015	7.61382	7.97634	7.84161	8.12112	0.309	1.2935	-1.0995	0.2375	0.1165	0.123924	0.328701	0.76699	0.613996	0.593388	1	1	1	1	1	Oo
20588	8.01764	7.5316	7.07246	6.71031	6.40316	-1.4095	-1.38	-1.3005	-1.253	-1.6675	0.0825017	0.0590541	0.347844	0.440613	0.214182	1	0.5	0.5	1	1	Oo
20589	4.70843	4.76675	4.68562	3.88287	4.47714	1.041	-1.058	-1.744	1.51	-1.155	0.863106	0.864385	0.0467753	0.16577	0.583667	1	0	0	0	0	Oo
20591	9.45451	9.24822	9.64491	9.71945	9.20835	-0.1995	1.326	0.0565	-1.433	-1.3535	0.15977	0.150234	0.71796	0.0787526	0.0750283	1	1	1	1	1	Oo
20597	7.34855	8.37409	8.67862	8.72831	8.85104	2.036	1.235	1.035	1.089	1.127	8.61283e-09	0.0181332	0.752297	0.398977	0.137737	1	0	1	1	1	Oo
20600	5.66725	5.62262	5.69645	5.74362	5.53457	-0.0435	0.0655	0.0415	-1.159	-0.133	0.0528204	0.233006	0.28605	0.540752	0.473737	0.5	1	0.5	0.5	0.5	OoCc
20602	6.17552	5.61218	5.46811	5.89517	6.04687	-1.478	-1.105	1.344	1.111	1.494	0.0138268	0.627915	0.128108	0.650564	0.0214263	1	1	0	0	0	Oo
20603	7.4364	7.59431	7.44454	7.78478	7.94997	-0.196	-1.11133	1.26733	0.460333	1.43333	0.562213	0.566465	0.170129	0.526144	0.0650858	1	1	1	0.666667	1	Oo
20610	10.0576	9.84635	9.76711	9.72184	9.72717	-1.158	-1.056	-1.032	1.004	-1.028	0.118974	0.668152	0.828939	0.981953	0.816453	1	1	1	1	1	Oo
20613	5.01825	7.13862	6.89325	6.17612	5.62668	4.348	-1.185	-1.644	-1.464	-2.406	2.63888e-09	0.319281	0.00512209	0.0409386	1.03734e-05	1	0	1	0	0	Oo
20615	7.26067	5.48074	5.9745	5.94971	5.96798	-3.434	1.408	-1.017	1.013	-1.005	2.98728e-08	0.0412191	0.941608	0.95647	0.979839	1	1	1	1	1	Oo
20616	8.71375	7.00241	6.52266	6.78285	6.89051	-3.275	-1.395	1.198	1.077	1.29	4.56446e-10	0.00720625	0.145187	0.607066	0.0211433	1	1	1	1	1	Oo
20619	5.32531	5.56012	5.24477	5.27802	5.21856	1.187	-1.26167	0.358333	-0.37	-0.36	0.430823	0.502112	0.548773	0.281848	0.423437	1	0.666667	0.666667	0.666667	0.666667	Oo
20623	7.48292	7.05225	6.89404	6.17097	5.63576	-1.3475	-0.124	-1.672	-0.5515	-2.7425	0.0223891	0.554426	0.0145224	0.495074	0.00856567	1	1	1	0.5	0.5	Oo
20624	9.18302	8.71417	8.53143	8.51278	8.752	-1.41267	-0.474667	-0.346333	1.191	1.17067	0.26732	0.387892	0.681885	0.450216	0.363291	1	0.666667	1	1	1	Oo
20630	9.10642	9.27096	9.58225	9.46668	9.38981	1.121	1.241	-1.083	-1.055	-1.143	0.344821	0.14296	0.652477	0.784753	0.335854	1	0	1	1	1	Oo
20637	8.77432	8.17647	7.50555	7.87995	8.41287	-1.513	-1.592	1.296	1.447	1.876	0.00674127	0.0109767	0.16257	0.0595922	0.000599533	1	1	1	1	1	Oo
20638	11.0277	8.78082	8.68602	8.17277	7.42305	-4.972	-1.0685	-1.4295	-1.682	-2.401	3.18557e-08	0.788386	0.0958875	0.0205197	7.8361e-05	1	1	1	1	0.5	Oo
20639	8.10588	7.90851	7.8407	7.96421	8.10705	-0.2005	-0.052	0.098	0.112	0.2395	0.0202427	0.468551	0.426464	0.486399	0.311126	1	1	1	1	1	Oo
20641	7.901	8.38448	8.5039	8.67736	8.8562	1.398	1.086	1.128	1.132	1.277	0.00306076	0.552366	0.396288	0.401044	0.03967	1	1	1	1	1	Oo
20643	11.1019	10.5609	10.3897	10.3374	10.4577	-1.455	-1.126	-1.037	1.087	1.048	0.000140273	0.24762	0.774163	0.48548	0.637062	1	1	1	1	1	Oo
20646	6.08563	5.90112	5.58795	6.15553	6.03649	-1.136	-1.242	1.482	-1.086	1.365	0.376058	0.221636	0.0312294	0.714072	0.0559432	0	0	0	0	1	Oo
20650	6.31292	5.64205	5.57903	4.97099	5.20631	-1.592	-1.045	-1.524	1.177	-1.295	0.0777465	0.914816	0.215183	0.685484	0.39277	0	1	0	0	0	OoCcMur
20652	7.65101	8.43215	8.19127	7.74481	7.13152	1.81767	-0.534	-1.39733	-1.55333	-2.246	0.230516	0.491481	0.326527	0.0556681	0.0195149	1	1	1	1	1	Oo
20655	10.7961	10.2698	9.97639	9.81894	10.0388	-0.933667	-1.23333	-1.116	1.168	-0.284	1.28646e-05	0.291494	0.421678	0.359412	0.627697	1	1	1	1	1	Oo
20656	8.39184	8.14095	7.88311	7.56659	6.98739	-0.73425	-1.199	-1.06825	-1.54325	-2.596	0.294608	0.368926	0.340969	0.192658	0.0147532	0.75	0.5	0.75	0.75	0.75	Oo
20658	6.76487	7.12458	7.02068	7.23346	7.30173	0.83925	-0.57625	0.668	0.0565	0.73825	0.268936	0.726457	0.406053	0.684354	0.395888	0.75	0.75	0.5	0.75	1	Oo
[truncated: 7,858 more rows]

## Sheet: Somatic
ENTREZ_GENE_ID	Fold change										p-values (fdr-corrected)										Presence							Location
	PMD4vsPMD3	PRIMARYvsPMD4	TLSvsPRIMARY	MLSvsTLS	PREANTRALvsMLS	ANTRALvsPREANTRAL	PRIMARYvsPMD3	MLSvsPRIMARY	ANTRALvsMLS	PREANTRALvsTLS	PMD4vsPMD3p	PRIMARYvsPMD4p	TLSvsPRIMARYp	MLSvsTLSp	PREANTRALvsMLSp	ANTRALvsPREANTRALp	PRIMARYvsPMD3p	MLSvsPRIMARYp	ANTRALvsMLSp	PREANTRALvsTLSp	PMD3.Pre	PMD4.Pre	PRIMARY.Pre	TLS.Pre	MLS.Pre	PREANTRAL.Pre	ANTRAL.Pre
11304	-1.013	1.2545	-0.001	-0.0105	1.157	-1.32	1.239	-0.011	-1.1405	1.146	0.760609	0.000101153	0.38972	0.569531	0.00267787	3.89631e-06	0.000101153	0.782098	0.00571193	0.0076199	0	0	1	1	1	1	0	SmMur
11305	-1.147	1.002	-1.03	-1.06	1.064	1.093	-1.145	-1.093	1.163	1.004	0.0167494	0.971708	0.56873	0.272095	0.243055	0.103865	0.971708	0.10425	0.009377	0.941618	1	1	1	0	0	0	1	Sm
11308	1.0965	-0.0325	0.0525	-0.0625	-0.0045	1.07	0.0655	-0.01	0.07	-0.072	0.247501	0.559269	0.391293	0.589964	0.322974	0.434849	0.559269	0.784494	0.297961	0.114692	1	1	1	1	1	1	1	SmMur
11363	1.0675	-0.035	0.0625	1.0745	1.2085	-0.028	0.0355	1.1365	1.1785	1.3015	0.301035	0.203625	0.365902	0.429147	0.0125088	0.165433	0.203625	0.0801329	0.0463335	0.00641119	1	1	1	1	1	1	1	OoSm
11364	-0.0125	-1.4115	1.1625	1.1795	1.2985	1.615	-1.4295	1.3725	2.105	1.5305	0.144168	0.0119244	0.170485	0.113442	0.0504539	0.000884893	0.0119244	0.00605044	2.15709e-05	0.00208936	1	1	1	1	1	1	1	Sm
11370	1.01	1.232	1.204	-1.217	1.182	1.068	1.244	-1.011	1.262	-1.029	0.858018	0.00139161	0.00345605	0.00226507	0.00709215	0.244054	0.00139161	0.847933	0.000519827	0.604141	1	1	1	1	1	1	1	Sm
11409	1.1065	1.443	0.003	-0.06	0.1005	1.2025	1.6175	-1.054	1.312	1.036	0.624594	0.00428788	0.497421	0.403442	0.457416	0.1031	0.00428788	0.524887	0.0798073	0.646278	1	1	1	1	1	1	1	Sm
11428	-1.031	1.099	-1.018	-1.106	1.066	1.228	1.066	-1.125	1.309	-1.037	0.589764	0.108025	0.753555	0.0887428	0.26783	0.00180901	0.108025	0.0485779	0.000153578	0.518291	1	1	1	1	1	1	1	SmMur
11429	-1.089	1.19	1.152	-1.022	1.274	1.006	1.093	1.127	1.282	1.247	0.228836	0.0209058	0.0541942	0.755486	0.00246062	0.932142	0.0209058	0.0978792	0.00203934	0.00488312	1	1	1	1	1	1	1	Sm
11432	1.159	-1.01	-1.012	1.043	1.039	1.146	1.148	1.03	1.191	1.083	0.0178815	0.866943	0.828896	0.466111	0.508827	0.0269022	0.866943	0.605623	0.00654114	0.173532	1	1	1	1	1	1	1	Sm
11438	-1.3645	-1.2135	1.061	-0.015	-1.1085	-1.0295	-1.6505	1.045	-1.1405	-1.1255	8.06271e-05	0.00265489	0.363236	0.762829	0.0921794	0.562703	0.00265489	0.420043	0.0152326	0.0948117	1	1	0.5	0.5	0.5	0	0	Sm
11443	-1.332	-1.099	1.055	-1.051	-1.013	1.094	-1.463	1.004	1.08	-1.064	0.000173583	0.135565	0.386131	0.421174	0.837097	0.152517	0.135565	0.948769	0.214667	0.316019	1	0	0	0	0	0	0	Sm
11449	1.025	1.214	1.01	-1.085	-1.171	-1.084	1.245	-1.074	-1.269	-1.27	0.609287	0.000771945	0.835216	0.104618	0.00406084	0.107674	0.000771945	0.151151	0.000105185	0.000101695	0	0	1	1	1	0	0	Sm
11461	0.3204	-0.5182	0.3056	0.9616	-0.728	-0.4806	-0.4276	1.4384	-0.7234	1.1788	0.30938	0.275834	0.290914	0.21618	0.290221	0.356838	0.275834	0.0833079	0.110332	0.42007	0.8	1	1	0.8	1	1	1	OoSm
11468	-1.526	1.034	1.601	1.999	-1.26	1.905	-1.476	3.202	1.512	1.587	0.0229963	0.84489	0.0127783	0.000755789	0.189739	0.0014057	0.84489	2.66002e-06	0.025886	0.0143426	1	1	1	1	1	1	1	Sm
11474	-0.0305	1.187	-1.1585	-1.168	-1.1235	0.008	1.152	-1.3535	-1.1125	-1.312	0.551373	0.00479809	0.0183863	0.020519	0.295914	0.549767	0.00479809	3.77894e-05	0.136226	0.000105439	1	1	1	1	1	0	0	Sm
11475	-1.126	-1.1635	1.54725	1.66525	-1.35925	1.706	-1.30925	2.58275	1.275	1.22775	0.521697	0.373762	0.0195999	0.0146399	0.145024	0.00618593	0.373762	7.06153e-05	0.324967	0.262983	1	1	1	1	1	1	1	SmMur
11477	-1.012	-1.17	1.126	1.119	-1.051	1.196	-1.185	1.26	1.138	1.065	0.838581	0.017439	0.0630922	0.0770647	0.416628	0.00816229	0.017439	0.00122376	0.0452903	0.308743	1	1	1	1	1	1	1	Sm
11481	-1.061	1.003	-1.476	1.011	-1.02	-1.314	-1.058	-1.46	-1.34	-1.009	0.531855	0.97665	0.000609734	0.911729	0.833233	0.00916438	0.97665	0.000777867	0.00580081	0.920501	1	1	1	1	1	1	1	SmMur
11486	1.011	-1.162	-1.028	1.057	-1.035	1.107	-1.149	1.029	1.069	1.022	0.805476	0.00397366	0.546241	0.231037	0.454503	0.0373985	0.00397366	0.539374	0.154004	0.639668	1	1	0	0	0	0	1	Sm
11489	-1.047	-1.392	1.029	-1.016	-1.04	1.018	-1.457	1.012	-1.022	-1.057	0.345806	2.04221e-06	0.551608	0.733204	0.418378	0.710998	2.04221e-06	0.797319	0.656565	0.25582	1	1	0	0	0	0	0	OoSm
11490	-1.098	-1.362	1.271	1.191	1.05	1.272	-1.495	1.513	1.336	1.25	0.143323	8.98916e-05	0.00103633	0.0104264	0.433682	0.000980748	8.98916e-05	2.91476e-06	0.000175081	0.00185179	1	1	1	1	1	1	1	Sm
11491	1.108	1.415	1.004	-1.125	1.398	-1.554	1.568	-1.12	-1.112	1.243	0.23688	0.000653369	0.9631	0.176729	0.000899031	6.03165e-05	0.000653369	0.190819	0.220791	0.0185496	1	1	1	1	1	1	1	OoSm
11492	1.137	-1.958	1.154	1.223	-1.261	1.37	-1.721	1.411	1.086	-1.031	0.0627365	8.60494e-09	0.0407859	0.00630596	0.00229847	0.000145541	8.60494e-09	5.51109e-05	0.217304	0.646628	1	1	1	1	1	1	1	Sm
11497	-1.05	1.125	-1.013	-1.023	-1.02	1.342	1.071	-1.036	1.316	-1.044	0.3084	0.0227589	0.792033	0.631415	0.675409	8.19992e-06	0.0227589	0.459764	1.89442e-05	0.373183	0	0	0	0	0	0	1	SmCc
11502	1.04	1.181	-1.004	1.12	-1.082	1.091	1.228	1.116	1.009	1.035	0.679613	0.0948049	0.966704	0.244403	0.414468	0.365887	0.0948049	0.260717	0.927394	0.716497	1	1	1	1	1	1	1	Sm
11504	-1.069	-1.145	1.211	-1.067	1.019	1.45	-1.224	1.136	1.477	-1.047	0.291415	0.0414932	0.00612624	0.30781	0.762823	1.26094e-05	0.0414932	0.0533915	6.94275e-06	0.466645	1	1	0	1	0	0	1	SmCcMr
11512	-1.369	1.461	-1.018	-1.237	1.057	-1.268	1.067	-1.259	-1.2	-1.171	0.00314137	0.000671482	0.847896	0.0325334	0.554945	0.0188105	0.000671482	0.02191	0.062444	0.102629	1	1	1	1	1	1	1	Sm
11513	1.058	-1.081	-1.017	1.104	-1.144	-1.035	-1.021	1.085	-1.183	-1.036	0.278398	0.14524	0.741089	0.0687388	0.0171157	0.509356	0.14524	0.126418	0.00407916	0.49425	1	1	1	1	1	1	1	Sm
11515	-1.057	1.171	1.05	-1.006	1.358	-1.124	1.108	1.043	1.209	1.35	0.42317	0.0308978	0.480595	0.924982	0.00026999	0.0992807	0.0308978	0.539876	0.0116076	0.000331261	1	1	1	1	1	1	1	Sm
11518	-1.05975	-1.14075	0.5975	-0.53525	0.005	1.1215	-1.207	1.058	0.629	0.467	0.651098	0.164974	0.240455	0.419064	0.404066	0.213066	0.164974	0.41427	0.225279	0.469292	1	1	0.75	1	1	1	1	Sm
11520	1.087	-1.292	1.165	-1.012	-1.182	1.087	-1.188	1.152	-1.087	-1.196	0.064883	1.31486e-05	0.00218128	0.7833	0.00107833	0.066101	1.31486e-05	0.00399855	0.0659825	0.000588575	1	1	1	1	1	1	1	SmCcMr
11522	-1.215	-1.1015	1.2645	-1.0805	1.553	5.5825	-1.335	1.171	8.671	1.438	0.136996	0.46643	0.0624319	0.514224	0.00159335	4.56084e-11	0.46643	0.201817	1.21562e-12	0.00656633	1	1	1	1	1	1	1	SmCcMr
11532	1.083	-1.092	-1.042	-1.01	1.099	-1.34	-1.008	-1.053	-1.219	1.088	0.258534	0.213431	0.55346	0.881444	0.182309	0.000474307	0.213431	0.460021	0.00958469	0.232149	1	1	1	1	1	1	1	Sm
11534	0.0225	0.058	0.042	-0.0285	-0.0035	0.0755	1.0775	0.0115	1.0695	-0.036	0.321844	0.56238	0.348304	0.560554	0.234691	0.506641	0.56238	0.694583	0.509072	0.0850359	1	1	1	1	1	1	1	OoSm
11536	1.019	-1.093	1.01	1.063	-1.003	1.219	-1.072	1.074	1.215	1.06	0.640576	0.0381986	0.803721	0.138664	0.937288	0.000105758	0.0381986	0.088611	0.000125052	0.158794	0	0	0	0	0	0	1	SmCc
11538	-1.267	1.132	1.101	-1.085	1.07	-1.17	-1.12	1.014	-1.093	-1.015	0.0947186	0.368868	0.483833	0.548647	0.621984	0.258396	0.368868	0.918536	0.513646	0.913853	1	1	1	1	1	1	1	Sm
11539	-1.566	-1.388	-1.04	-1.287	-1.009	1.47	-2.172	-1.338	1.456	-1.299	0.00284844	0.0209629	0.763996	0.0667094	0.942641	0.00819718	0.0209629	0.0369156	0.00957552	0.0580647	1	1	1	1	0	0	1	SmCcMr
11544	1.29	-1.206	-1.11	1.066	1.037	-1.004	1.069	-1.042	1.033	1.105	0.0331953	0.105674	0.35343	0.570009	0.74277	0.972395	0.105674	0.712474	0.768962	0.374074	1	1	1	1	1	1	1	Sm
11545	-1.146	-0.386667	1.09467	1.139	-0.344	-1.39633	-1.209	1.25267	-1.42767	1.12333	0.0508328	0.297765	0.39053	0.253276	0.248393	0.00115827	0.297765	0.243613	0.0672387	0.0924046	1	1	1	1	1	1	1	SmCc
11546	0.037	1.031	-1.097	1.096	1.1125	-1.356	0.071	0	-1.2165	1.221	0.309674	0.695735	0.367418	0.262155	0.11542	0.000258228	0.695735	0.780235	0.00899402	0.0101581	1	1	1	1	1	1	1	Sm
11549	-1.052	-1.148	-1.026	1.031	-1.035	-1.011	-1.208	1.005	-1.047	-1.004	0.151138	0.000731782	0.454629	0.376894	0.317438	0.746049	0.000731782	0.888649	0.191831	0.903841	1	1	0	0	0	0	0	Sm
11551	1.1	1.329	1.716	1.121	1.645	-1.925	1.462	1.924	-1.17	1.844	0.546746	0.0842014	0.00284188	0.471824	0.00512781	0.000570755	0.0842014	0.000575338	0.325519	0.00103897	1	1	1	1	1	1	1	Sm
11553	1.025	1.011	-1.03	1.087	-1.015	1.02	1.036	1.055	1.005	1.071	0.460456	0.732858	0.373263	0.0194119	0.648073	0.544905	0.732858	0.113931	0.880105	0.0493591	0	0	0	0	1	0	0	Sm
11555	-1.004	-1.039	1.264	-1.296	1.015	1.93	-1.043	-1.025	1.959	-1.277	0.946211	0.509511	0.000709222	0.000274189	0.796789	1.70435e-09	0.509511	0.664375	1.21166e-09	0.000480742	1	1	1	1	0	0	1	Sm
11564	-1.083	1.161	-1.012	1.041	1.185	-1.432	1.072	1.029	-1.208	1.234	0.140261	0.0101077	0.818504	0.446262	0.00435675	2.3362e-06	0.0101077	0.591702	0.0019385	0.000801929	1	1	1	1	1	1	1	Sm
11565	1.164	1.124	-0.0035	-1.052	1.208	1.6575	1.309	-1.056	2.0105	1.1475	0.0652156	0.0767455	0.939793	0.453114	0.00964085	3.54867e-07	0.0767455	0.437245	3.17679e-09	0.0432415	0.5	0.5	1	1	1	1	1	Sm
11566	1.28	-1.467	-1.243	1.031	-1.202	1.159	-1.146	-1.206	-1.037	-1.166	0.110275	0.0181895	0.156482	0.837904	0.226955	0.327412	0.0181895	0.219524	0.809252	0.310284	1	1	1	1	1	1	1	Sm
11568	-1.029	-1.548	1.557	1.107	1.199	4.603	-1.593	1.724	5.52	1.328	0.825816	0.00326689	0.00298163	0.436317	0.173433	1.0585e-09	0.00326689	0.000528655	1.85457e-10	0.0404322	1	1	1	1	1	1	1	Sm
11569	1.019	1.013	-1.036	1.021	1.011	1.141	1.032	-1.015	1.153	1.032	0.676918	0.786147	0.442804	0.657801	0.819184	0.0099254	0.786147	0.741769	0.00604534	0.503801	1	1	1	1	1	1	1	Sm
11600	1.075	-1.135	1.088	-1.003	-1.04	1.691	-1.056	1.085	1.626	-1.043	0.0949215	0.0066909	0.055941	0.945537	0.352838	3.66404e-10	0.0066909	0.0638534	1.21259e-09	0.319917	0	0	0	0	0	0	1	Sm
11601	1.081	1.104	1.942	1.714	1.472	-1.552	1.194	3.329	-1.055	2.523	0.41386	0.300184	1.6033e-06	2.10496e-05	0.00064801	0.00018984	0.300184	2.99764e-10	0.574489	1.58855e-08	1	1	1	1	1	1	1	Sm
11603	-1.031	-1.641	1.098	-1.075	-1.683	1.092	-1.692	1.022	-1.542	-1.809	0.853038	0.0073586	0.572106	0.663374	0.00527323	0.597071	0.0073586	0.895667	0.0165438	0.00201996	1	1	1	1	1	1	1	SmCc
11604	1.029	1.207	-1.133	1.044	-1.126	-1.046	1.243	-1.085	-1.178	-1.078	0.564325	0.00136867	0.0211798	0.391796	0.0275864	0.374582	0.00136867	0.115259	0.00403203	0.144294	0	1	1	1	1	0	0	Sm
11606	-1.008	1.035	1.223	1.131	1.696	-1.287	1.026	1.384	1.317	1.918	0.905116	0.624822	0.00919935	0.0899003	6.00954e-07	0.00183911	0.624822	0.000190212	0.000889409	3.19543e-08	0	0	0	1	1	1	1	SmMur
11607	1.016	-1.232	1.038	1.003	-1.009	1.026	-1.213	1.041	1.017	-1.006	0.755679	0.000586573	0.456661	0.960156	0.859658	0.607576	0.000586573	0.427776	0.735285	0.899018	0	1	0	0	0	0	0	Sm
11625	1.094	1.1225	-1.1885	-1.07	1.0415	1.232	1.2285	-1.2715	1.285	-1.027	0.267843	0.0406036	0.00397422	0.197236	0.439285	0.00230086	0.0406036	0.000218834	0.00041781	0.578288	0	0.5	1	0	0	0	0.5	Sm
11628	1.049	1.038	1.008	1.037	1.02	1.095	1.089	1.046	1.117	1.058	0.187194	0.292386	0.810781	0.301267	0.578196	0.016966	0.292386	0.207834	0.00509381	0.120818	0	0	0	0	0	0	1	SmCcMr
11629	0.008	-1.1795	1.021	1.0265	-1.029	1.0325	-1.172	1.0485	0.004	-0.0025	0.599191	0.000684109	0.603875	0.525335	0.505727	0.42622	0.000684109	0.263829	0.807422	0.930429	1	1	0	0	0	0	0	SmCc
11630	-1.035	-1.18	1.071	-1.014	-1.051	1	-1.221	1.056	-1.051	-1.066	0.423531	0.000991812	0.116944	0.739387	0.249303	0.999829	0.000991812	0.206479	0.249221	0.14414	0	1	0	0	0	0	0	Sm
11632	-1.077	-1.291	1.103	1.033	1.089	-1.051	-1.39	1.139	1.036	1.126	0.367497	0.00548242	0.240109	0.689542	0.300829	0.54028	0.00548242	0.122816	0.663976	0.158868	1	1	1	1	1	1	1	Sm
11634	1.027	1.32	-1.142	1.005	-1.105	-1.044	1.355	-1.137	-1.154	-1.1	0.523842	2.74807e-06	0.00437683	0.910633	0.0246175	0.301786	2.74807e-06	0.00559532	0.00256283	0.0310087	0	0	1	1	0	0	0	OoSmCc
11636	-1.015	1.024	1.012	1.006	-1.024	1.296	1.008	1.019	1.266	-1.018	0.691967	0.5413	0.753224	0.868407	0.540157	3.0293e-06	0.5413	0.631972	9.9871e-06	0.653481	0	0	0	0	0	0	1	SmCc
11637	-0.353333	1.33167	-1.16133	1.13767	-1.086	-1.10867	1.30133	0.31	-1.20433	1.04867	0.504425	0.00553324	0.132688	0.168572	0.402452	0.179932	0.00553324	0.272104	0.0660141	0.551761	1	1	1	1	1	1	1	Sm
11639	-1.068	1.07	-1.361	-1.231	1.071	-1.035	1.001	-1.676	1.035	-1.15	0.30401	0.29531	0.000122897	0.00390472	0.287601	0.588558	0.29531	2.2415e-07	0.591901	0.0388639	1	1	1	1	1	1	1	SmCcMr
11641	1.059	-1.244	1.106	1.034	1.171	1.18	-1.174	1.144	1.382	1.211	0.426169	0.00660888	0.170453	0.641593	0.0392057	0.0313494	0.00660888	0.0737802	0.000264864	0.0149168	1	1	1	1	1	1	1	SmCc
11647	1.024	-1.19	1.157	1.036	-1.056	1.166	-1.162	1.198	1.105	-1.02	0.646667	0.00304056	0.00993202	0.4967	0.294345	0.00708312	0.00304056	0.00222458	0.0644362	0.703255	1	1	0	1	1	1	1	Sm
11655	1.231	1.357	1.01	-1.042	-1.149	3.018	1.67	-1.032	2.628	-1.196	0.185414	0.0583387	0.949166	0.789042	0.370003	1.12222e-06	0.0583387	0.838387	6.19028e-06	0.249363	1	1	1	1	1	1	1	SmMur
11656	1.372	-1.799	1.044	1.132	1.552	-1.056	-1.312	1.182	1.469	1.757	7.78677e-05	2.76119e-08	0.496163	0.0580834	1.53045e-06	0.381937	2.76119e-08	0.0143158	8.24542e-06	5.0085e-08	1	1	0	0	0	1	1	Sm
11658	1.033	1.003	1.108	-1.129	-1.439	-1.089	1.037	-1.019	-1.567	-1.624	0.668453	0.963424	0.185393	0.122035	0.000136071	0.26859	0.963424	0.807769	1.31802e-05	5.16535e-06	1	1	1	1	1	1	1	SmMur
11666	-1.165	-1.023	1.045	-1.038	-1.015	1.223	-1.191	1.006	1.204	-1.054	0.069778	0.779876	0.587769	0.63883	0.848748	0.0205227	0.779876	0.941349	0.0304514	0.51091	1	1	1	1	1	0	1	Sm
11668	-1.205	-1.704	1.288	-1.042	1.179	-1.259	-2.054	1.236	-1.069	1.131	0.190451	0.00116679	0.0823642	0.767455	0.246598	0.110243	0.00116679	0.140632	0.633901	0.380965	1	1	1	1	1	1	1	SmMur
11669	1.134	1.154	-1.132	-1.022	1.054	-1.066	1.309	-1.157	-1.012	1.032	0.124226	0.0842391	0.1306	0.78486	0.506986	0.421022	0.0842391	0.0794023	0.885071	0.693777	1	1	1	1	1	1	1	OoSm
11674	1.095	1.151	1.325	-1.141	1.777	1.212	1.26	1.161	2.153	1.557	0.383559	0.183225	0.0127596	0.20937	2.68633e-05	0.0748852	0.183225	0.157845	7.45532e-07	0.000410449	1	1	1	1	1	1	1	OoSm
11676	-1.068	-1.071	1.03	1.035	1.123	1.566	-1.143	1.066	1.759	1.163	0.200767	0.182198	0.56059	0.491894	0.0302879	5.8935e-08	0.182198	0.212247	1.9515e-09	0.00699099	1	1	1	0	1	1	1	SmCcMr
11684	1.067	1.145	-1.039	1.201	-1.271	1.195	1.222	1.156	-1.063	-1.059	0.344402	0.0566107	0.569318	0.0133319	0.00211117	0.0154199	0.0566107	0.0435036	0.366584	0.402754	1	1	1	1	1	1	1	Sm
11690	1.078	-1.156	-1.01	1.15	-1.042	1.188	-1.073	1.139	1.14	1.104	0.204239	0.0204259	0.864022	0.0245755	0.482478	0.00763375	0.0204259	0.034907	0.0339382	0.0984897	1	1	1	0	1	1	1	Sm
11692	1.172	1.054	-1.309	1.009	-1.211	-1.414	1.235	-1.297	-1.713	-1.201	0.0731508	0.53575	0.00480109	0.917447	0.0338288	0.000637766	0.53575	0.00602143	5.59763e-06	0.0416835	1	1	1	1	1	1	1	Sm
11705	1.155	3.782	1.685	-1.884	-1.532	-3.328	4.369	-1.118	-5.099	-2.887	0.583169	7.85983e-05	0.059198	0.0251184	0.116428	0.000223162	7.85983e-05	0.670149	7.6805e-06	0.000728358	1	1	1	1	1	1	0	Sm
11732	1.068	-1.047	-1.075	1.031	-1.028	1.475	1.02	-1.043	1.435	1.003	0.194106	0.356643	0.15518	0.538378	0.580677	3.91385e-07	0.356643	0.402019	1.04834e-06	0.949097	1	1	1	1	1	1	1	SmMur
11733	1.144	1.316	-1.15733	1.72233	0.389667	-1.799	1.50567	1.51333	-1.67533	1.84467	0.0779978	0.0059281	0.204657	2.25517e-06	0.406616	2.04857e-05	0.0059281	0.00165101	4.53548e-05	1.70157e-06	0	0.666667	1	1	1	1	1	SmMur
11735	-1.0035	-0.0305	1.036	1.093	1.3325	-1.528	-0.034	1.133	-1.135	1.4615	0.938957	0.449543	0.566929	0.0724413	0.000791319	5.95224e-05	0.449543	0.0559118	0.122602	2.42901e-05	0.5	0.5	0.5	0.5	0.5	1	0	SmCc
11736	-1.183	-1.438	1.174	-1.017	1.162	1.127	-1.701	1.154	1.31	1.142	0.069385	0.000624071	0.0827167	0.844975	0.101288	0.186957	0.000624071	0.118297	0.00638903	0.143459	1	1	1	1	1	1	1	OoSm
11737	1.127	1.0955	1.0355	1.123	1.1915	-1.1755	1.2295	1.1665	0.013	1.344	0.327547	0.345332	0.698227	0.380449	0.0346595	0.0386982	0.345332	0.346151	0.754965	0.0132666	1	1	1	1	1	1	1	SmMur
11740	1.114	-1.032	1.325	-1.147	1.089	1.185	1.079	1.155	1.291	-1.054	0.154339	0.666866	0.00120625	0.0751627	0.25569	0.0318314	0.666866	0.0639105	0.00265139	0.48191	1	1	1	1	1	1	1	OoSm
11745	1.217	1.545	-0.065	1.106	0.011	-0.0445	1.8855	0.0435	-1.032	1.116	0.0605437	0.000386936	0.316178	0.393711	0.447179	0.489525	0.000386936	0.544084	0.74179	0.279287	1	1	1	1	1	1	1	Sm
11746	1.011	1.101	-1.068	1.048	1.013	1.015	1.114	-1.019	1.028	1.061	0.856813	0.134375	0.298997	0.458732	0.834136	0.813324	0.134375	0.757993	0.656643	0.345245	0	0	1	1	1	1	1	SmCc
11747	1.121	-1.971	1.424	1.262	1.158	2.444	-1.758	1.797	2.83	1.461	0.270866	3.26589e-06	0.00258832	0.0330695	0.161728	8.01128e-08	3.26589e-06	1.92983e-05	8.80267e-09	0.00148229	1	1	1	1	1	1	1	OoSm
11749	-1.505	-1.899	1.657	-1.124	-1.246	1.523	-2.86	1.474	1.222	-1.401	0.015485	0.000576114	0.00404342	0.45271	0.166052	0.0132278	0.000576114	0.0206377	0.205019	0.0406281	1	1	1	1	1	1	1	OoSmMur
11754	-1.291	-2.05	1.373	2.846	-1.05	-1.295	-2.647	3.907	-1.36	2.71	0.237214	0.00309851	0.146955	0.000105107	0.816582	0.231567	0.00309851	5.01755e-06	0.158142	0.000172628	1	1	1	1	1	1	1	Sm
11757	-1.009	-1.125	1.131	1.122	1.164	1.193	-1.135	1.269	1.388	1.306	0.94594	0.367357	0.348952	0.378557	0.250887	0.184578	0.367357	0.0791675	0.019786	0.0516415	1	1	1	1	1	1	1	Sm
11764	1.159	-1.051	-1.454	1.191	-1.128	1.132	1.103	-1.221	1.003	1.056	0.419743	0.784122	0.0508394	0.340535	0.509351	0.497493	0.784122	0.278147	0.984865	0.762909	1	1	1	1	1	1	1	SmCc
11765	1.034	-1.088	-1.01	1.046	1.122	1.053	-1.052	1.036	1.182	1.173	0.472961	0.0790293	0.834245	0.336631	0.0205632	0.264339	0.0790293	0.448255	0.00174404	0.002499	1	1	1	1	0	1	1	Sm
11767	1.21	-1.153	-1.179	1.125	1.086	1.062	1.05	-1.048	1.153	1.222	0.171915	0.302748	0.235475	0.391922	0.544178	0.660866	0.302748	0.72962	0.301568	0.152597	1	1	1	1	1	1	1	SmCc
11768	-1.097	-0.394333	-1.15333	-0.372667	-1.19467	-1.056	-1.16367	-1.19667	-1.25967	-1.24067	0.0993218	0.262751	0.0392712	0.420644	0.0217786	0.371755	0.262751	0.00488327	0.000466575	0.00241577	1	1	1	1	0.666667	0	0	Sm
11769	-0.377667	-1.047	-0.332333	-0.364667	1.108	1.166	-1.08967	-1.03067	1.29167	1.07533	0.178402	0.663087	0.560595	0.667154	0.170675	0.0293884	0.663087	0.652338	0.0018468	0.432886	1	1	1	1	1	1	1	Sm
11771	-1.527	1.0475	1.1865	-1.2985	1.1095	1.002	-1.458	-1.093	1.111	-1.1695	0.0470779	0.817491	0.396244	0.224521	0.613602	0.992216	0.817491	0.664122	0.60634	0.43674	1	1	1	1	1	1	1	Sm
11772	-1.164	-1.162	1.154	-1.038	1.156	-1.093	-1.353	1.112	1.057	1.113	0.0562648	0.0594982	0.0707263	0.621834	0.0681121	0.246506	0.0594982	0.172125	0.464902	0.166498	1	1	1	1	1	1	1	SmMur
11773	1.184	-1.74	1.161	-1.045	1.065	1.323	-1.47	1.111	1.408	1.019	0.062082	4.82566e-06	0.0946149	0.606958	0.467482	0.00412181	4.82566e-06	0.229667	0.000821007	0.829176	1	1	1	1	1	1	1	Sm
11774	-1.027	-1.122	0.0125	0.019	1.1475	-1.135	-1.1525	1.0295	0.01	1.167	0.703267	0.0723366	0.359052	0.329442	0.0644003	0.0511716	0.0723366	0.62347	0.512043	0.0299155	1	1	1	1	1	1	1	Sm
11775	-1.362	-2.472	1.029	-1.052	-1.118	1.004	-3.366	-1.022	-1.113	-1.176	0.0204461	8.74316e-07	0.816439	0.681974	0.3696	0.972328	8.74316e-07	0.858404	0.38774	0.198322	1	1	0	0	0	0	0	Sm
11776	-1.235	-1.093	1.247	-1.315	1.033	-1.005	-1.35	-1.055	1.028	-1.273	0.135412	0.516655	0.119192	0.0575137	0.812454	0.973502	0.516655	0.696945	0.838262	0.0902766	1	1	1	1	1	1	1	Sm
11778	1.0735	0	0.012	-0.025	1.0745	0.0265	1.074	-0.013	0.108	0.053	0.534362	0.98595	0.13709	0.340399	0.414611	0.293471	0.98595	0.541598	0.298865	0.110007	0.5	0.5	0.5	1	0.5	0.5	0.5	Sm
11781	-1.0735	1.0185	1.119	-1.1155	1.202	-0.0045	-1.054	0.004	1.196	1.0785	0.305037	0.770348	0.108879	0.165868	0.0131943	0.950257	0.770348	0.675553	0.0151319	0.286531	1	1	1	1	1	1	1	Sm
11782	-1.045	-1.227	1.324	-1.114	1.214	-1.077	-1.282	1.189	1.127	1.09	0.723769	0.109681	0.0333975	0.386379	0.127496	0.547898	0.109681	0.172197	0.336492	0.485422	1	1	1	1	1	1	1	Sm
11783	1.154	-1.016	-1.07	1.193	1.364	-1.215	1.136	1.115	1.123	1.627	0.255902	0.899363	0.585976	0.166792	0.0210287	0.129336	0.899363	0.386338	0.356391	0.000950788	1	1	1	1	1	1	1	Sm
11785	-1.298	1.045	-1.171	-1.005	-1.204	1.082	-1.242	-1.177	-1.113	-1.21	0.000130662	0.422562	0.00840532	0.924793	0.0027613	0.156642	0.422562	0.00684905	0.0601078	0.00224257	1	1	1	1	1	1	1	Sm
11787	-1.138	-1.228	1.053	-1.035	-1.037	1.455	-1.397	1.018	1.403	-1.073	0.140153	0.0251223	0.541738	0.688832	0.667682	0.000324829	0.0251223	0.832056	0.000833528	0.410241	1	1	1	1	1	1	1	Sm
11789	-1.029	1.053	-1.031	1.029	1.021	1.088	1.023	-1.002	1.11	1.051	0.632203	0.393773	0.612764	0.631696	0.730474	0.172051	0.393773	0.978391	0.0936242	0.413458	1	1	1	1	1	1	1	SmCc
11792	1.035	1.304	-1.101	1.237	1	-1.189	1.349	1.124	-1.189	1.238	0.659138	0.00303375	0.227365	0.0129567	0.999144	0.0376279	0.00303375	0.146282	0.0377093	0.0129271	1	1	1	1	1	1	1	Sm
11797	-1.104	0.348667	-0.334	0.317333	1.10033	-1.10467	-0.422333	-0.349667	0.328	0.421	0.374468	0.410809	0.378643	0.45513	0.332681	0.186996	0.410809	0.566933	0.424802	0.478924	1	1	0.666667	0.666667	1	1	1	Sm
11799	-0.398	-1.12967	-1.365	1.14	-1.09867	-2.12133	-1.20033	-1.2	-2.33	0.369667	0.554604	0.256977	0.00543327	0.321164	0.36071	4.22307e-06	0.256977	0.10394	9.97844e-07	0.569299	1	1	1	1	1	1	1	Sm
11804	1.216	-1.158	-1.354	1.358	-1.124	2.414	1.05	1.003	2.148	1.209	0.322326	0.453544	0.132248	0.128617	0.551263	0.000253605	0.453544	0.987374	0.000939734	0.336413	1	1	1	1	1	1	1	Sm
11806	-1.324	3.992	-1.118	-1.208	1.158	-4.018	3.015	-1.35	-3.47	-1.043	0.388368	0.00041671	0.729424	0.559293	0.649184	0.000398593	0.00041671	0.356775	0.00108501	0.896133	1	1	1	1	1	1	1	SmMur
11808	-1.709	2.362	1.229	1.492	2.673	-5.876	1.382	1.832	-2.199	3.986	0.118151	0.0172158	0.535922	0.236391	0.00774158	4.40511e-05	0.0172158	0.0803681	0.0270644	0.000543112	0	0	1	1	1	1	1	SmMur
11810	-1.031	1.078	1.008	1.088	1.292	-1.205	1.046	1.096	1.072	1.406	0.527774	0.129947	0.874372	0.0915435	4.49399e-05	0.00103506	0.129947	0.0679937	0.157362	1.42352e-06	1	1	1	1	1	1	1	Sm
11812	0.029	-1.3905	-1.028	-1.035	-1.2485	1.4055	-1.3475	-1.065	1.123	-1.2965	0.60911	0.000533603	0.653699	0.62776	0.0390073	0.00129335	0.000533603	0.40062	0.0801022	0.0317771	1	1	0.5	0.5	0.5	0	1	SmCc
11814	-1.511	1.892	-1.178	1.12	1.193	-1.888	1.252	-1.052	-1.582	1.336	0.108147	0.0179479	0.509803	0.647925	0.477639	0.0182808	0.0179479	0.837369	0.0767968	0.25	0	0	1	1	1	1	0	Sm
11816	1.16	-1.462	1.171	1.03	-1.416	-1.032	-1.261	1.205	-1.462	-1.375	0.197961	0.00315223	0.172769	0.793487	0.00590053	0.776092	0.00315223	0.109432	0.00316101	0.01041	1	1	1	1	1	1	1	Sm
11819	-0.002	-1.4305	1.1255	1.1495	-1.19	1.0845	-1.4415	1.3005	-1.0955	-1.033	0.238046	0.000265196	0.301896	0.106322	0.0846634	0.290026	0.000265196	0.0299744	0.371941	0.733922	1	1	0.5	0.5	0.5	0.5	0.5	SmCc
11820	-1.207	-1.364	1.136	-1.026	-1.447	1.609	-1.646	1.107	1.113	-1.484	0.00068679	2.90731e-06	0.012294	0.583749	2.90794e-07	7.65452e-09	2.90731e-06	0.0386274	0.0312991	1.15384e-07	1	1	1	1	1	1	1	Sm
11821	1.088	-1.262	1.179	-1.049	-1.084	1.203	-1.16	1.124	1.11	-1.137	0.249525	0.00439763	0.0329117	0.509136	0.273519	0.0187179	0.00439763	0.117864	0.160645	0.0886338	1	1	1	1	1	1	1	Sm
11826	-1.05	-1.23033	1.18967	1.29733	-1.14733	0.343	-1.289	1.57167	-1.142	1.12	0.482802	0.15712	0.15361	0.0569104	0.178555	0.531783	0.15712	0.00840399	0.441481	0.371427	0.666667	0.666667	0.333333	0.666667	1	0.666667	0.666667	Sm
11830	-1.0925	-1.4565	-1.0075	1.095	1.056	1.0525	-1.581	1.0865	1.112	1.159	0.196257	0.00141396	0.871641	0.232757	0.458976	0.335251	0.00141396	0.30665	0.100531	0.138248	1	1	0.5	0.5	0.5	0.5	0.5	Sm
11833	1.021	0.019	1.0975	1.206	1.955	-2.356	1.04	1.323	-1.206	2.353	0.789155	0.810426	0.235958	0.0354906	1.66299e-07	3.12268e-09	0.810426	0.00284307	0.0256925	2.56973e-09	0	0	0	0	0.5	1	0	SmMur
11834	-1.028	1.008	1.062	1.082	1.02	-1.203	-1.02	1.149	-1.179	1.103	0.585178	0.875641	0.237849	0.127142	0.694139	0.00157218	0.875641	0.0116005	0.0037469	0.0612595	1	1	1	0	1	1	0	Sm
11835	-1.009	1.393	1.246	-1.099	1.085	-1.412	1.38	1.134	-1.302	-1.013	0.946174	0.0228509	0.115502	0.48658	0.547236	0.0184671	0.0228509	0.356726	0.0628007	0.923807	1	1	1	1	1	1	1	Sm
11836	-1.307	-1.3905	-0.052	0.077	1.2465	1.0445	-1.793	0.021	1.3005	1.3395	0.148578	0.00541336	0.557316	0.324141	0.0634184	0.737806	0.00541336	0.637777	0.018062	0.0111085	1	1	1	1	1	1	1	Sm
11837	1.127	-1.182	-1.203	1.187	-1.061	1.08	-1.049	-1.013	1.018	1.118	0.29178	0.146675	0.111674	0.137736	0.594718	0.492929	0.146675	0.905803	0.875883	0.324174	1	1	1	1	1	1	1	Sm
11839	-1.007	1.001	1.066	1.036	-1.116	1.293	-1.006	1.104	1.158	-1.078	0.922327	0.988676	0.364605	0.611521	0.125992	0.00157942	0.988676	0.165511	0.0467788	0.29023	0	0	0	0	0	0	1	Sm
11840	1.055	-1.191	1.04	1.18	1.183	1.06	-1.129	1.227	1.254	1.396	0.370532	0.00803119	0.509985	0.0115007	0.0103864	0.331585	0.00803119	0.00270993	0.00120055	2.52296e-05	1	1	1	1	1	1	1	Sm
11841	1.039	-1.471	1.088	1.126	-1.083	-1.285	-1.416	1.225	-1.391	1.04	0.711535	0.0014076	0.419441	0.257679	0.442997	0.0243667	0.0014076	0.0618706	0.00464387	0.704512	1	1	1	1	1	1	1	SmCc
11842	-1.113	-1.098	-1.016	1.014	-1.343	1.287	-1.223	-1.002	-1.043	-1.324	0.222805	0.2833	0.854158	0.871382	0.00287296	0.0083881	0.2833	0.982495	0.625315	0.00410171	1	1	1	1	1	1	1	SmCc
11844	-1.176	1.006	1.21	-1.354	1.324	1.111	-1.169	-1.119	1.471	-1.023	0.0377073	0.933609	0.0168464	0.000575489	0.00112715	0.161864	0.933609	0.135042	5.04164e-05	0.760174	1	1	1	1	1	1	1	Sm
11845	1.011	-1.073	1.167	-1.194	1.057	1.363	-1.062	-1.022	1.441	-1.129	0.866192	0.266263	0.0214267	0.0100491	0.37506	9.44541e-05	0.266263	0.721673	1.47998e-05	0.0635935	1	1	1	1	1	1	1	Sm
11846	-1.033	1.073	-1.025	1.036	1.176	1.293	1.038	1.011	1.52	1.219	0.443679	0.111555	0.568775	0.405277	0.00123032	1.09868e-05	0.111555	0.788676	1.51337e-08	0.000195844	0	0	0	0	0	1	1	SmCcMr
11852	1.052	-1.8	1.755	-1.391	-1.014	-1.189	-1.711	1.261	-1.206	-1.411	0.84878	0.0392325	0.047503	0.226392	0.95849	0.519326	0.0392325	0.390753	0.486809	0.208279	1	1	1	1	1	1	1	Sm
11853	-0.0335	-1.307	0.1155	1.1165	1.0485	1.0885	-1.368	1.2495	1.14	1.1715	0.248928	0.0123294	0.116157	0.111966	0.656186	0.261027	0.0123294	0.124317	0.0636521	0.0276119	1	1	1	0.5	1	1	1	SmCc
11854	1.088	-1.764	1.147	1.057	-1.078	3.91	-1.622	1.213	3.625	-1.02	0.294459	1.19228e-06	0.095418	0.481033	0.343984	2.33471e-12	1.19228e-06	0.0235949	5.86296e-12	0.803335	1	1	1	1	1	1	1	Sm
11856	-1.002	-1.105	1.132	1	1.008	1.176	-1.107	1.132	1.185	1.008	0.972279	0.0804185	0.0339774	0.996784	0.885146	0.00783129	0.0804185	0.0337006	0.00571928	0.881967	0	0	0	0	0	0	1	SmCcMr
11857	-1.083	-1.522	1.134	-1.017	-1.052	1.298	-1.648	1.115	1.234	-1.069	0.196647	1.76046e-06	0.0490127	0.785296	0.407046	0.000388969	1.76046e-06	0.0828058	0.00245504	0.275412	1	1	0	1	1	1	1	Sm
11858	1.014	-1.004	1.238	-1.553	1.003	1.956	1.011	-1.255	1.961	-1.549	0.861843	0.964618	0.0156846	3.6255e-05	0.972654	1.75161e-07	0.964618	0.0110995	1.65392e-07	3.89169e-05	1	1	1	1	1	1	1	OoSmMur
11861	1.059	-1.007	1.055	-1.047	-1.053	-1.024	1.051	1.008	-1.079	-1.103	0.19073	0.866586	0.216259	0.284485	0.231245	0.57509	0.866586	0.859961	0.0874762	0.0312901	1	1	1	1	1	0	0	OoSm
11863	1.02	-1.02	1.021	-1.027	1.07	1.052	1	-1.006	1.126	1.041	0.676607	0.680632	0.667832	0.576461	0.174798	0.298749	0.680632	0.895901	0.0234959	0.409008	1	1	1	1	1	1	1	Sm
11865	1.066	1.272	-1.179	-1.068	-1.087	1.417	1.355	-1.259	1.304	-1.16	0.360982	0.0024754	0.0261967	0.346993	0.235589	7.94734e-05	0.0024754	0.003385	0.00109674	0.0421611	1	1	1	1	1	1	1	OoSmCc
11867	-0.426	0.256667	1.152	-0.391667	-1.20133	1.544	-1.158	1.09433	1.29033	-1.277	0.194286	0.531916	0.344136	0.588113	0.222786	0.00353161	0.531916	0.565597	0.0910355	0.216226	1	1	1	1	1	1	1	Sm
11881	1.058	-1.144	1.19	1.151	1.172	1.159	-1.082	1.37	1.358	1.349	0.525888	0.13942	0.0611062	0.123561	0.0851052	0.107817	0.13942	0.00208353	0.00258803	0.0030602	1	1	1	1	1	1	1	Sm
11883	1.122	-1.859	1.221	1.096	1.063	1.547	-1.657	1.339	1.644	1.165	0.243633	5.23284e-06	0.0509931	0.347147	0.532219	0.000260655	5.23284e-06	0.00697738	6.81137e-05	0.126988	1	1	1	1	1	1	1	Sm
11886	0.057	-0.133	0.034	1.1005	1.067	1.8345	-0.064	1.142	1.959	1.175	0.397082	0.232038	0.554781	0.433736	0.457491	4.80435e-05	0.232038	0.498203	1.40604e-05	0.213336	1	1	0.5	1	1	1	1	Sm
11889	1.016	1.09	-1.03	-1.004	-1.004	1.957	1.107	-1.033	1.949	-1.007	0.6777	0.0315275	0.436518	0.92331	0.922977	1.19043e-12	0.0315275	0.383504	1.29912e-12	0.847062	0	0	0	0	0	0	1	SmCc
11890	-1.145	1.164	-1.025	-1.138	-1.086	-1.061	1.016	-1.166	-1.153	-1.236	0.156454	0.115714	0.791507	0.177099	0.379456	0.524327	0.115714	0.111868	0.138939	0.0336446	1	1	1	1	1	0	0	Sm
11891	1.025	1.584	-1.627	-1.292	-1.338	10.457	1.623	-2.102	7.813	-1.729	0.859842	0.00358361	0.00233453	0.0775254	0.0472481	3.22447e-12	0.00358361	4.26817e-05	2.70796e-11	0.000889222	1	1	1	1	1	1	1	OoSm
11898	1.085	-1.675	1.44	-1.214	-1.184	1.415	-1.545	1.186	1.195	-1.437	0.274829	1.53001e-06	9.37959e-05	0.0152493	0.0314875	0.000157046	1.53001e-06	0.0296355	0.0237927	9.98875e-05	1	1	1	1	1	1	1	Sm
11907	1.057	0.0245	-1.0785	1.0805	-0.003	1.1075	1.084	0.0005	1.103	1.075	0.477934	0.637495	0.294241	0.463589	0.476988	0.145913	0.637495	0.648279	0.0801939	0.243707	0.5	1	0.5	0.5	0.5	0.5	0.5	Sm
11909	-0.0045	0.0445	1.0475	-1.034	-0.0185	-0.0145	0.041	0.014	-0.0355	-0.055	0.535212	0.14015	0.555542	0.789284	0.420802	0.319389	0.14015	0.727555	0.099144	0.300642	1	1	0.5	0.5	1	1	1	OoSm
11910	1.352	-1.853	1.892	-1.462	-1.122	1.432	-1.371	1.294	1.276	-1.641	0.0698625	0.0010142	0.000760669	0.0261724	0.469417	0.0340607	0.0010142	0.116396	0.136123	0.00552459	1	1	0	1	0	0	1	SmCc
11911	1.248	1.0445	1.186	-1.113	-1.1555	1.2525	1.3085	1.0635	1.094	-1.2905	0.163354	0.734614	0.226946	0.361813	0.411244	0.0607053	0.734614	0.692787	0.525514	0.122405	1	1	1	1	1	1	1	Sm
11920	-1.099	-1.0495	0.0485	-0.032	-0.014	-1.1805	-1.155	0.017	-1.196	-0.045	0.418606	0.439824	0.548414	0.268544	0.605554	0.0174106	0.439824	0.688413	0.0224478	0.621313	1	1	1	1	1	1	0.5	Sm
11927	1.074	-1.199	-1.005	1.372	1.076	1.544	-1.117	1.365	1.661	1.476	0.743453	0.407802	0.982282	0.157452	0.736363	0.0580428	0.407802	0.16351	0.0295952	0.0862113	1	1	1	1	1	1	1	Sm
11928	1.124	1.425	-1.073	1.026	-1.013	1.26	1.602	-1.046	1.244	1.013	0.186152	0.000651273	0.417907	0.770341	0.885223	0.0146953	0.000651273	0.600527	0.0199259	0.882455	1	1	1	1	1	1	1	OoSm
11931	-1.383	-2.815	1.184	1.236	1.452	-2.45	-3.895	1.463	-1.688	1.795	0.00543574	1.20796e-08	0.116508	0.0530334	0.00194981	9.71398e-08	1.20796e-08	0.00164971	8.25486e-05	2.40367e-05	1	1	1	1	1	1	1	OoSmMur
11932	-1.166	1.531	1.494	-1.153	1.254	-1.122	1.313	1.296	1.117	1.088	0.324735	0.0119672	0.0168588	0.362062	0.153774	0.456779	0.0119672	0.105007	0.474536	0.585302	1	1	1	1	1	1	1	Sm
11933	1.125	-1.054	1.012	1.131	1.123	-1.297	1.067	1.144	-1.155	1.27	0.204871	0.562268	0.898133	0.186226	0.209123	0.00955157	0.562268	0.150047	0.124994	0.0157062	1	1	1	1	1	1	1	Sm
11937	-1.033	1.311	-1.172	1.058	-1.197	1.003	1.269	-1.107	-1.193	-1.132	0.47208	1.06583e-05	0.00220797	0.217792	0.000755311	0.938155	1.06583e-05	0.0330864	0.000895903	0.0119606	1	0	1	1	1	0	0	Sm
11938	-0.0015	1.0775	0.075	0.061	1.0745	-1.514	0.083	1.131	-1.4105	1.1385	0.20865	0.563057	0.47846	0.493631	0.57759	0.0102492	0.563057	0.323511	0.0355957	0.368472	1	1	1	1	1	1	1	Sm
11944	-1.055	-1.802	1.011	1.01	-1.045	1.131	-1.901	1.021	1.082	-1.035	0.400661	3.26006e-08	0.857134	0.875489	0.484725	0.063256	3.26006e-08	0.736654	0.220262	0.585964	1	1	0	0	0	0	0	Sm
11945	1.001	1.014	-1.019	-1.005	1.128	1.519	1.015	-1.025	1.714	1.122	0.982643	0.707403	0.601043	0.881925	0.00388324	1.69325e-09	0.707403	0.503426	3.26063e-11	0.00537699	0	0	0	0	0	0	1	Sm
11946	-1.019	-1.135	1.281	-1.016	-1.039	1.084	-1.156	1.26	1.044	-1.056	0.877777	0.297241	0.0513669	0.891765	0.751578	0.502889	0.297241	0.0668879	0.721261	0.651444	1	1	1	1	1	1	1	Sm
11947	1.052	1.05	1.014	1.131	1.084	1.051	1.104	1.147	1.139	1.226	0.539652	0.552942	0.868612	0.144614	0.332763	0.54322	0.552942	0.107895	0.124176	0.0217313	1	1	1	1	1	1	1	Sm
11949	1.14	-1.093	1.228	-1.068	1.118	1.122	1.044	1.15	1.254	1.047	0.132571	0.30134	0.0245097	0.440093	0.197485	0.184283	0.30134	0.111863	0.0143805	0.589056	1	1	1	1	1	1	1	Sm
11957	-1.035	1.4	0.066	-0.018	1.189	-1.2175	1.3535	0.055	-0.0135	1.1795	0.694423	0.0120125	0.569548	0.200207	0.0612779	0.365523	0.0120125	0.0710678	0.115091	0.371833	1	1	1	1	1	1	1	Sm
11957	1.001	1.076	1.237	1.095	1.287	-1.415	1.078	1.354	-1.099	1.41	0.989629	0.51264	0.0698931	0.418521	0.0343189	0.00569942	0.51264	0.0132736	0.401789	0.0060895	1	1	1	1	1	1	1	Sm
11964	-1.034	-1.397	1.225	1.132	-1.125	1.37	-1.444	1.388	1.218	1.007	0.722055	0.00202772	0.0409854	0.19435	0.217886	0.00324092	0.00202772	0.00238971	0.0469064	0.943766	1	1	1	1	1	1	1	Sm
11966	-1.091	-1.274	1.042	-1.115	-1.193	1.38	-1.39	-1.07	1.157	-1.33	0.447412	0.0458644	0.720506	0.347666	0.135206	0.0106716	0.0458644	0.5551	0.211467	0.0213719	1	1	1	1	1	1	1	Sm
11972	-0.622	-1.33275	-0.022	0.0905	1.1515	1.196	-1.49675	1.064	1.38	1.2535	0.193718	0.0507147	0.335735	0.451531	0.175836	0.190306	0.0507147	0.471583	0.0679724	0.0906829	1	1	1	1	1	1	1	Sm
11973	1.21	-1.021	-1.259	1.076	-1.054	1.549	1.185	-1.17	1.469	1.021	0.0992779	0.851912	0.0501215	0.509517	0.634539	0.000915195	0.851912	0.169554	0.00261982	0.85177	1	1	1	1	1	1	1	Sm
11974	-1.101	-1.252	1.048	1.004	1.061	1.414	-1.378	1.052	1.5	1.065	0.36612	0.0439144	0.658108	0.971808	0.57635	0.00375297	0.0439144	0.632982	0.0010891	0.552819	1	1	1	1	1	1	1	Sm
11975	-1.137	1.031	1.175	-1.114	1.221	1.285	-1.102	1.055	1.569	1.096	0.332297	0.812301	0.226271	0.412731	0.138671	0.0669647	0.812301	0.682777	0.00267424	0.484976	1	1	1	1	1	1	1	SmMur
11977	-1.024	1.158	-1.013	1.085	-1.02	-1.255	1.132	1.071	-1.28	1.064	0.731599	0.0417416	0.843261	0.237833	0.774468	0.00337437	0.0417416	0.320789	0.00179321	0.364229	1	1	1	1	1	1	1	OoSm
11981	-1.2135	-1.0175	-1.007	-1.157	1.1565	-1.221	-1.2345	-1.1655	-0.0515	-0.0035	0.0124356	0.800585	0.921782	0.0544852	0.135815	0.185679	0.800585	0.0425762	0.475809	0.22726	1	1	1	1	1	1	0.5	Sm
11982	-1.01	1.16	1.02	1.06	1.504	1.249	1.148	1.081	1.879	1.594	0.889465	0.0476013	0.77901	0.416118	1.79211e-05	0.00519386	0.0476013	0.278852	6.05237e-08	3.57458e-06	1	1	1	1	1	1	1	OoSmMur
11983	1.166	-1.006	-1.224	1.103	-1.124	1.467	1.159	-1.11	1.306	-1.019	0.196791	0.957652	0.0950588	0.403599	0.321764	0.00370088	0.957652	0.375064	0.031711	0.871676	1	1	1	1	1	1	1	SmCc
11988	-1.042	1.02	-1.09	1.004	-1.084	-1.026	-1.022	-1.087	-1.112	-1.08	0.351163	0.656169	0.0610185	0.935755	0.0792708	0.554157	0.656169	0.0712191	0.0243678	0.0921182	1	1	1	0	0	0	0	Sm
11993	-1.1555	1.04	1.1835	-1.069	1.233	1.082	-1.112	1.108	1.3305	1.1515	0.0747282	0.671057	0.0732975	0.392237	0.151529	0.332244	0.671057	0.381732	0.0184817	0.334918	1	1	1	1	1	1	1	Sm
11997	0.0355	-0.16	1.1265	0.0005	-0.0245	1.559	-1.114	1.123	1.518	-0.027	0.38407	0.473536	0.359243	0.124144	0.0519165	7.28921e-05	0.473536	0.144785	4.64029e-05	0.001642	0.5	0.5	0.5	0.5	0.5	1	1	Sm
12009	-1.056	1.109	-1.05	-1.058	1.04	-1.203	1.05	-1.111	-1.157	-1.018	0.256044	0.0399337	0.310306	0.240153	0.412392	0.000993054	0.0399337	0.0369922	0.00613803	0.710955	1	1	1	1	1	1	1	Sm
12010	-1.049	-2.3265	1.238	1.0525	1.1525	-1.1775	-2.4405	1.3025	-0.0215	1.2125	0.71816	3.15215e-06	0.112867	0.688381	0.270551	0.220927	3.15215e-06	0.0543847	0.772215	0.140025	1	1	1	1	1	1	1	Sm
12014	1.078	-1.929	-1.007	1.044	-1.118	-1.058	-1.79	1.037	-1.183	-1.071	0.215102	2.59613e-09	0.907525	0.470035	0.0730252	0.346119	2.59613e-09	0.542832	0.0103817	0.257431	1	1	1	1	1	1	0	Sm
12015	-1.015	-1.04	1.269	-1.112	1.056	1.258	-1.056	1.141	1.328	-1.054	0.826284	0.574546	0.00289448	0.139398	0.440657	0.00379131	0.574546	0.0713075	0.000683008	0.457092	1	1	1	1	1	1	1	SmCcMr
12017	1.177	1.315	-1.354	1.245	-1.108	1.33	1.547	-1.088	1.2	1.123	0.269393	0.0716893	0.0485382	0.142886	0.481187	0.0615556	0.0716893	0.563835	0.217345	0.425836	1	1	1	1	1	1	1	OoSm
12021	-1.001	1.054	1.024	1.023	1.089	-1.205	1.053	1.048	-1.106	1.114	0.977658	0.142581	0.505148	0.508839	0.0240075	4.57625e-05	0.142581	0.192911	0.0091318	0.00580143	0	0	0	0	0	1	0	Sm
12028	-1.495	1.257	1.188	-1.002	1.182	-1.06	-1.19	1.185	1.115	1.18	0.000175776	0.0148769	0.0573152	0.983912	0.06323	0.498995	0.0148769	0.0596026	0.212165	0.0657289	1	1	1	1	1	1	1	Sm
12033	-1.177	1.0835	-0.0035	-0.0685	0.0265	-1.3065	-1.086	-1.0695	-1.2745	-1.0395	0.179656	0.504374	0.650617	0.623695	0.705702	0.0297928	0.504374	0.561036	0.0556723	0.740834	1	1	1	1	1	1	1	Sm
12034	1.314	1.008	-1.067	1.046	1.126	1.433	1.325	-1.02	1.614	1.178	0.068356	0.956198	0.651123	0.755057	0.408152	0.0202328	0.956198	0.887777	0.00333344	0.260018	1	1	1	1	1	1	1	Sm
12035	1.032	1.008	1.109	1.006	1.234	1.668	1.04	1.116	2.058	1.242	0.519847	0.863098	0.0441929	0.901447	0.000378717	5.33639e-09	0.863098	0.0344608	2.56462e-11	0.000289263	0	0	0	1	1	1	1	SmCcMr
12036	-1.223	1.58	1.376	-1.24	1.15	-1.091	1.292	1.11	1.054	-1.078	0.195142	0.00696512	0.0471417	0.167308	0.361641	0.568181	0.00696512	0.495067	0.726648	0.620024	1	1	1	1	1	1	1	Sm
12039	-1.039	1.03	1.095	-1.084	1.063	-1.233	-1.009	1.01	-1.16	-1.02	0.530936	0.629729	0.145192	0.190149	0.318033	0.00256816	0.629729	0.873118	0.0229039	0.741052	1	1	1	1	1	1	1	Sm
12040	1.169	-1.025	-1.073	1.194	1.216	-1.005	1.141	1.112	1.21	1.452	0.104016	0.791701	0.445164	0.067369	0.0457367	0.956029	0.791701	0.257352	0.0509971	0.000728958	1	1	1	0	1	1	1	Sm
12041	-1.347	-1.1655	0.001	-0.0005	-0.0055	-1.0555	-1.57	0.0005	-1.0625	-0.006	0.0102153	0.199924	0.575934	0.733671	0.471137	0.616	0.199924	0.372368	0.629601	0.700212	1	1	1	1	1	1	1	Sm
12042	1.111	-1.008	1.333	-1.267	1.269	-1.083	1.102	1.052	1.172	1.001	0.273899	0.933929	0.00655814	0.0205689	0.0199394	0.401045	0.933929	0.594579	0.106084	0.988146	1	1	1	1	1	1	1	Sm
12043	0.52225	0.52725	1.01425	-1.14475	-1.2065	1.0285	1.05	-1.129	-1.175	-1.381	0.364837	0.52499	0.805541	0.0291371	0.0416531	0.652045	0.52499	0.0501697	0.152082	0.00031196	1	1	1	1	1	0	0	Sm
12045	-1.031	1.041	-1.006	-1.023	1.053	1.004	1.01	-1.029	1.057	1.03	0.423781	0.293811	0.873201	0.556658	0.182161	0.922943	0.293811	0.456698	0.15475	0.439673	1	1	0	0	0	1	0	Sm
12048	0.300667	1.18767	-0.334667	-1.06833	-1.11133	1.079	1.148	-1.069	-0.365333	-1.18767	0.685782	0.0466455	0.872537	0.44415	0.131081	0.390602	0.0466455	0.401031	0.590545	0.024654	0.666667	1	1	1	1	0.333333	0.666667	Sm
12050	-1.1645	1.276	1.0605	-1.246	-1.099	1.317	1.096	-1.176	1.2045	-1.372	0.162258	0.0227053	0.615359	0.0348991	0.424008	0.0127447	0.0227053	0.108157	0.178753	0.0121427	1	1	1	1	1	1	1	Sm
12053	1.164	1.118	1.806	-1.497	1.163	1.883	1.302	1.207	2.19	-1.287	0.206348	0.346692	8.55112e-05	0.00280982	0.209893	4.06391e-05	0.346692	0.122031	3.1739e-06	0.0431868	1	1	1	1	1	1	1	SmMur
12054	1.043	-1.032	1.076	-1.068	1.046	-1.069	1.011	1.008	-1.022	-1.02	0.352673	0.482386	0.113462	0.157155	0.321215	0.149091	0.482386	0.852541	0.63082	0.652611	0	1	1	1	1	0	0	Sm
12068	1.119	-1.106	-1.137	1.136	1.162	-1.048	1.011	-1.001	1.109	1.319	0.0644674	0.0933152	0.0376206	0.038756	0.0172314	0.424639	0.0933152	0.988208	0.0863407	0.000140594	1	1	1	1	1	1	1	Sm
12069	1.07967	1.20333	-1.51	-1.301	1.218	-1.54033	1.30067	-2.009	-0.651333	-0.415	0.412439	0.172943	0.0981895	0.123343	0.337426	0.000893026	0.172943	0.0203573	0.0351018	0.00256926	1	1	1	1	1	1	1	Sm
12070	-1.005	1.132	1.063	1.016	1.464	-1.227	1.126	1.08	1.193	1.486	0.965993	0.295828	0.599316	0.894866	0.00405049	0.0924358	0.295828	0.512145	0.142926	0.00302921	1	1	1	1	1	1	1	Sm
12075	1.447	-1.567	-1.288	1.142	-1.139	-1.052	-1.083	-1.128	-1.198	1.003	0.00528997	0.00119285	0.0430517	0.267261	0.277347	0.664486	0.00119285	0.313278	0.136295	0.98055	1	1	1	0	1	0	0	Sm
12091	1.169	1.036	-1.064	1.033	1.381	-1.152	1.21	-1.03	1.198	1.427	0.316642	0.819161	0.686801	0.831592	0.0476014	0.361412	0.819161	0.848309	0.247771	0.0310352	1	1	1	1	1	1	1	SmCc
12095	1.0795	-1.567	-1.031	-0.0015	-1.0275	-1.0275	-1.447	-1.033	-1.0555	-1.0295	0.199717	1.23349e-06	0.579564	0.981628	0.642909	0.705727	1.23349e-06	0.56375	0.408939	0.626665	1	1	0	0	0	0	0	Sm
12111	1.149	-5.442	2.291	1.394	-1.678	2.033	-4.737	3.193	1.212	-1.204	0.31786	4.80419e-10	1.06184e-05	0.0247919	0.00131701	6.33179e-05	4.80419e-10	1.29777e-07	0.172687	0.187051	1	1	1	1	1	1	1	Sm
12122	-1.15	1.186	1.034	-1.054	1.067	-1.344	1.032	-1.019	-1.259	1.013	0.125973	0.0654953	0.704365	0.554564	0.46185	0.00332099	0.0654953	0.830823	0.016549	0.882555	1	1	1	1	1	1	1	Sm
12124	1.042	1.098	-1.11	1.024	-1.133	-1.009	1.144	-1.084	-1.143	-1.107	0.281553	0.0226352	0.0119939	0.535911	0.00376189	0.805491	0.0226352	0.0436095	0.00218646	0.0144963	1	1	1	1	1	0	0	OoSm
12125	-0.0135	0.009	0.0195	1.0625	1.19	-1.234	-0.0045	1.0825	-0.036	1.264	0.615727	0.745004	0.433097	0.28973	0.0100875	0.00599903	0.745004	0.222869	0.153536	0.00189757	1	1	1	1	1	1	1	Sm
12144	1.044	1.0515	-0.117	-0.02	-1.0485	-1.397	1.1	-1.1325	-1.459	-0.072	0.607201	0.569301	0.443563	0.603059	0.717694	0.0472945	0.569301	0.349476	0.0129959	0.464108	1	1	1	1	1	1	1	Sm
12151	1.08	1.067	-1.05	1.076	-1.174	1.127	1.152	1.024	-1.042	-1.092	0.155209	0.223424	0.353381	0.173274	0.00617361	0.0323002	0.223424	0.646276	0.439014	0.106949	1	1	1	1	1	1	1	OoSm
12153	-0.429	1.34	0.271333	-0.544	-1.31433	1.30267	1.26067	-1.25167	0.332	-1.55767	0.238549	0.0645706	0.184101	0.27882	0.0769913	0.068625	0.0645706	0.115016	0.593973	0.0462768	1	1	1	1	1	1	1	Sm
12159	-1.259	-1.863	1.3	-1.137	-1.279	1.031	-2.344	1.143	-1.24	-1.454	0.0884791	0.00013737	0.0547616	0.326463	0.0701079	0.810563	0.00013737	0.307509	0.109445	0.00907939	1	1	1	1	1	1	1	Sm
12162	-1.026	-1.356	-1.018	-1.104	-1.2	1.298	-1.392	-1.125	1.081	-1.326	0.689495	0.000152132	0.776907	0.133244	0.00995514	0.000684298	0.000152132	0.0795539	0.232306	0.000330208	1	1	1	1	1	0	1	Sm
12166	-0.075	-1.087	1.0345	1.037	1.063	0.0475	-1.163	1.0725	0.124	1.103	0.42864	0.393023	0.647143	0.589654	0.394788	0.0408932	0.393023	0.338068	0.105788	0.254744	1	1	1	1	1	1	1	OoSmCc
12167	1.101	1.825	1.1065	1.174	1.6665	-2.1125	2.009	1.299	-1.266	1.9545	0.467067	2.3443e-05	0.347376	0.153724	0.000164892	2.14629e-06	2.3443e-05	0.024458	0.0386497	6.08591e-06	1	1	1	1	1	1	1	OoSm
12168	1.0145	1.0155	1.0765	1.059	1.247	-1.246	1.0305	1.1405	0.002	1.3215	0.78592	0.77465	0.221104	0.28764	0.00109949	0.00238011	0.77465	0.0542705	0.733131	0.000179177	0.5	0.5	0.5	0.5	1	1	0.5	SmMur
12175	1.039	1.099	1.092	-1.091	1.107	1.203	1.142	1.001	1.332	1.015	0.533999	0.136905	0.164213	0.168919	0.111882	0.00725152	0.136905	0.986649	0.000194305	0.813306	1	1	1	1	1	1	1	Sm
12177	-1.082	-1.428	-1.035	-1.021	-1.199	1.05	-1.544	-1.056	-1.142	-1.224	0.487472	0.00495833	0.757935	0.856338	0.118232	0.664432	0.00495833	0.625543	0.245124	0.0849416	1	1	1	1	1	1	1	Sm
12181	1.262	-1.151	-1.269	1.306	1.125	1.216	1.096	1.029	1.368	1.469	0.207606	0.439133	0.198154	0.151487	0.517267	0.286616	0.439133	0.872717	0.0961097	0.0450447	1	1	1	1	1	1	1	Sm
12183	1.057	1.446	-1.212	1.061	-1.284	-1.081	1.529	-1.142	-1.388	-1.209	0.162406	2.50494e-08	0.000102635	0.136869	4.99923e-06	0.0564376	2.50494e-08	0.00294272	1.35017e-07	0.000114215	0	1	1	1	1	0	0	OoSmMur
12190	-0.0185	1.238	-1.072	1.0105	-0.0675	-1.5375	1.2155	-1.061	-1.651	-0.056	0.67896	0.00352474	0.342425	0.809676	0.218696	3.13382e-06	0.00352474	0.386641	9.26989e-08	0.143339	1	1	1	1	1	1	1	Sm
12192	0.311333	-1.49267	1.22767	-1.055	-0.630333	0.287667	-1.50967	0.499	-0.701	-1.36433	0.594098	0.00748745	0.0983454	0.526863	0.328653	0.60668	0.00748745	0.278913	0.253667	0.0436941	1	1	0.666667	0.666667	0.666667	0.666667	0.666667	OoSm
12212	1.011	1.034	-1.036	1.05	1.062	-1.052	1.046	1.013	1.009	1.115	0.866568	0.618902	0.596998	0.468684	0.377547	0.454111	0.618902	0.842024	0.890331	0.117825	1	1	1	1	1	1	1	OoSm
12224	1.144	-1.868	1.272	-1.091	-1.103	1.125	-1.633	1.166	1.02	-1.204	0.0343784	5.54757e-09	0.000706252	0.152712	0.111168	0.0603359	5.54757e-09	0.0176573	0.744259	0.00549863	1	1	0	1	1	0	1	Sm
12226	0.0555	-3.078	1.9015	-1.269	1.234	1.1265	-2.9165	1.493	1.408	-0.0375	0.525087	1.14372e-07	0.00027244	0.150156	0.26819	0.513777	1.14372e-07	0.0043493	0.244432	0.0816057	1	1	1	1	1	1	1	OoSm
12228	1.023	-1.071	1.059	-1.053	1.071	1.211	-1.047	1.006	1.298	1.017	0.604652	0.133027	0.202831	0.251912	0.131203	0.000373166	0.133027	0.891451	1.40375e-05	0.694372	0	0	0	0	0	0	1	Sm
12231	-1.444	2.245	-1.009	-2.083	1.091	-1.229	1.554	-2.102	-1.126	-1.909	0.00229834	4.43736e-07	0.930606	1.61854e-06	0.407285	0.0608058	4.43736e-07	1.37885e-06	0.262859	7.97734e-06	1	0	1	1	0	0	0	Sm
12234	-1.444	1.401	1.02	-1.363	-1.252	-1.012	-1.03	-1.336	-1.267	-1.706	0.00825375	0.0137773	0.875088	0.0220677	0.0852097	0.923454	0.0137773	0.0305275	0.0711019	0.000436888	1	1	1	1	1	1	1	OoSmMur
12237	1.149	1.079	-1.156	1.153	-1.031	-1.105	1.24	-1.002	-1.139	1.119	0.00743207	0.112874	0.00543899	0.00608009	0.515336	0.0429969	0.112874	0.959276	0.0110273	0.0245721	1	1	1	1	1	1	1	OoSm
12238	-1.28	1.07	1.047	-1.198	1.149	1.027	-1.196	-1.144	1.18	-1.042	0.031606	0.529848	0.668961	0.105087	0.204321	0.803337	0.529848	0.218864	0.13413	0.700078	1	1	1	1	1	1	1	Sm
12257	1.07967	-1.09333	1.11667	-0.359333	-0.369667	2.74767	-0.347333	1.08767	2.65133	-0.398	0.455106	0.341377	0.300045	0.720045	0.690012	4.41115e-08	0.341377	0.383953	4.07243e-08	0.524267	1	1	1	1	1	1	1	SmCc
12258	-1.135	-4.488	2.469	1.188	-1.441	1.098	-5.095	2.934	-1.313	-1.213	0.313712	6.77673e-10	1.02748e-06	0.17595	0.00820864	0.456085	6.77673e-10	9.4021e-08	0.0396841	0.132933	1	1	1	1	1	1	1	SmMur
12259	1.027	-1.126	1.016	-1.004	1.015	1.03	-1.096	1.012	1.045	1.011	0.505535	0.00734361	0.698031	0.92646	0.715229	0.461643	0.00734361	0.767111	0.276547	0.784887	0	1	0	0	0	0	0	Sm
12260	-1.047	-1.426	1.06	1.032	-1.074	1.217	-1.494	1.094	1.133	-1.041	0.396249	3.94326e-06	0.291272	0.563434	0.1977	0.00183772	3.94326e-06	0.111519	0.0315487	0.462785	1	1	0	0	0	0	0	Sm
12261	-1.069	1.006	1.035	1.082	1.089	1.002	-1.063	1.119	1.09	1.178	0.401767	0.940283	0.666763	0.323882	0.288215	0.983854	0.940283	0.16409	0.27958	0.0497304	1	1	1	1	1	1	1	OoSm
12262	-1.024	-1.627	1.11	-1.012	-1.008	1.16	-1.666	1.096	1.15	-1.021	0.551965	4.02686e-10	0.0147784	0.750233	0.829532	0.00122181	4.02686e-10	0.0287638	0.00196527	0.594727	1	1	0	0	0	0	0	Sm
12263	1.061	-2.515	1.347	1.413	-1.186	1.247	-2.37	1.903	1.051	1.191	0.595292	1.72037e-07	0.0143655	0.00568119	0.137111	0.0597256	1.72037e-07	1.77164e-05	0.653501	0.127586	1	1	1	1	1	1	1	Sm
12266	-1.113	-1.142	1.047	1.065	-1.051	1.582	-1.271	1.115	1.505	1.013	0.234842	0.144559	0.607347	0.477015	0.571798	6.09725e-05	0.144559	0.227953	0.000204191	0.882052	1	1	0	0	0	0	1	Sm
12282	-1.016	1.096	1.121	1	1.187	-1.172	1.079	1.121	1.013	1.187	0.821897	0.194886	0.112218	0.996242	0.0219063	0.0319196	0.194886	0.111271	0.855154	0.0216923	1	1	1	1	1	1	1	SmCcMr
12291	-1.15	-1.478	1.014	1.007	-1.053	1.011	-1.7	1.021	-1.042	-1.046	0.0163044	9.41987e-07	0.798009	0.898221	0.337564	0.837636	9.41987e-07	0.701519	0.446846	0.403375	1	1	0	0	0	0	0	Sm
12293	-1.015	1.303	1.202	1.029	1.146	-1.074	1.283	1.236	1.066	1.178	0.876658	0.0136571	0.0731312	0.773624	0.175727	0.465961	0.0136571	0.0417136	0.513721	0.106349	1	1	1	1	1	1	1	Sm
12296	-1.029	-1.173	-1.012	1.012	-1.09	1.017	-1.207	-1.001	-1.072	-1.078	0.419	0.000230645	0.727705	0.742271	0.0222597	0.636113	0.000230645	0.984496	0.0579929	0.0435702	1	1	0	0	0	0	0	Sm
12297	-1.168	-1.019	1.375	-1.281	-1.239	1.199	-1.19	1.073	-1.033	-1.588	0.034309	0.783483	0.000196355	0.00186914	0.00546245	0.0152371	0.783483	0.310826	0.635346	2.75049e-06	1	1	1	1	1	1	1	Sm
12298	1.047	-1.1	1.009	1.057	-1.024	1.024	-1.051	1.066	1	1.032	0.376503	0.0764158	0.860206	0.292005	0.649036	0.651281	0.0764158	0.222479	0.997489	0.540814	1	1	1	1	1	1	0	Sm
12301	1.03	-1.001	1.019	-1.021	1.037	-1.043	1.029	-1.002	-1.007	1.015	0.649327	0.982767	0.770566	0.750035	0.583223	0.517518	0.982767	0.978403	0.920281	0.81661	1	0	1	0	0	0	0	OoSm
12304	1.083	1.202	1.249	1.194	1.532	-1.843	1.302	1.492	-1.203	1.829	0.238492	0.0122492	0.0034335	0.0149898	5.25895e-06	4.12699e-08	0.0122492	1.16352e-05	0.0117761	4.9315e-08	1	1	1	1	1	1	1	OoSm
12305	-1.216	1.125	1.096	1.159	-1.349	-1.28	-1.081	1.271	-1.727	-1.163	0.0203238	0.14246	0.245008	0.0693419	0.0010991	0.0048289	0.14246	0.0059246	1.58024e-06	0.0639401	1	1	1	1	1	1	1	OoSmCc
12306	-1.007	-2.004	-1.015	1.207	-1.586	3.234	-2.017	1.189	2.039	-1.314	0.938409	3.20693e-07	0.864144	0.0431349	5.25201e-05	1.36548e-10	3.20693e-07	0.0603766	2.27657e-07	0.00564117	1	1	1	1	1	1	1	SmCc
12310	1.061	-1.047	-1.058	1.027	1.009	1.055	1.014	-1.031	1.065	1.036	0.169668	0.282886	0.190969	0.534757	0.828704	0.213263	0.282886	0.476336	0.148671	0.405321	0	1	1	0	0	0	0	Sm
12314	1.049	-1.183	1.073	1.165	-1.071	-1.307	-1.128	1.25	-1.401	1.088	0.664041	0.139506	0.525139	0.175896	0.533097	0.0242911	0.139506	0.0549044	0.00638159	0.448402	1	1	1	1	1	1	1	Sm
12315	1.073	-2.141	1.379	1.031	1.05	1.794	-1.995	1.422	1.884	1.083	0.523537	1.89703e-06	0.00840787	0.779454	0.655841	4.57751e-05	1.89703e-06	0.00456536	1.83075e-05	0.470496	1	1	1	1	1	1	1	Sm
12316	1.205	2.535	1.206	-1.355	-1.834	-1.453	3.055	-1.123	-2.664	-2.485	0.148185	7.72307e-07	0.146143	0.0244686	0.000126774	0.0074982	7.72307e-07	0.357805	3.83715e-07	1.0294e-06	1	1	1	1	1	1	0	OoSmMur
12317	1.221	-1.6	1.75	1.027	1.408	1.305	-1.31	1.797	1.837	1.445	0.141802	0.00209919	0.000467546	0.841866	0.0173405	0.0557967	0.00209919	0.000302588	0.000210145	0.0113427	1	1	1	1	1	1	1	OoSm
12321	0.02275	-1.45975	1.20375	1.0485	1.194	1.1485	-1.45425	1.26275	1.3625	1.2515	0.2015	0.0183695	0.187347	0.509056	0.128588	0.236653	0.0183695	0.084812	0.000810083	0.0433867	0.75	0.75	0.75	0.75	0.75	0.75	1	Sm
12323	-1.018	-1.932	-1.201	1.05	-1.06	-1.013	-1.968	-1.143	-1.074	-1.009	0.695718	5.21264e-11	0.000880528	0.296682	0.216861	0.785611	5.21264e-11	0.00903575	0.137424	0.839334	1	1	1	0	0	0	0	Sm
12328	1.021	1.072	1.041	1.005	1.206	1.013	1.094	1.046	1.221	1.211	0.777223	0.345635	0.580696	0.949011	0.01773	0.859467	0.345635	0.538327	0.0121739	0.01549	1	1	1	1	1	1	1	Sm
12331	-1.183	-1.233	1.407	1.057	1.058	1.276	-1.459	1.486	1.351	1.118	0.227002	0.136691	0.0210721	0.686654	0.677621	0.08707	0.136691	0.00891625	0.0388173	0.416195	1	1	1	1	1	1	1	SmCc
12332	-1.04	1.057	1.12	-1.042	1.274	1.177	1.016	1.075	1.499	1.222	0.593178	0.450622	0.129218	0.569103	0.00342514	0.0352021	0.450622	0.324858	2.662e-05	0.0118862	1	1	1	1	1	1	1	Sm
12333	1.07	1.11	-1.026	1.045	-1.128	1.303	1.188	1.019	1.155	-1.079	0.408944	0.205884	0.747112	0.583779	0.146806	0.00396907	0.205884	0.82025	0.0882989	0.349666	1	1	1	1	1	1	1	Sm
12334	1.079	-1.36333	1.147	1.10933	1.132	1.181	-1.265	1.27067	1.336	1.254	0.267299	0.000129969	0.0572728	0.172231	0.0666143	0.0196136	0.000129969	0.00181315	0.000141096	0.00231222	1	1	1	1	1	1	1	Sm
12336	-1.234	-2.042	1.339	-1.182	1.013	1.6	-2.521	1.133	1.62	-1.167	0.0632185	3.41366e-06	0.0135519	0.133527	0.907774	0.000358904	3.41366e-06	0.255089	0.00027899	0.163053	1	1	1	1	1	1	1	Sm
12337	1.275	1.596	-1.032	1.247	1.536	-1.22	2.034	1.209	1.259	1.916	0.141023	0.0084586	0.845681	0.177468	0.0141984	0.223451	0.0084586	0.243113	0.160436	0.00068452	1	1	1	1	1	1	1	SmCcMr
12338	1.106	-2.017	1.061	1.1	1.731	-1.615	-1.824	1.167	1.072	1.905	0.091249	5.2679e-10	0.307941	0.10681	2.13689e-08	1.4861e-07	5.2679e-10	0.0135412	0.232252	1.94618e-09	1	1	0	0	0	1	1	SmMur
12339	-1.058	1.002	1.035	-1.035	1.201	1.062	-1.056	-1.001	1.276	1.16	0.583476	0.985184	0.738468	0.734466	0.0868737	0.55516	0.985184	0.995743	0.0270466	0.159245	1	1	1	1	1	1	1	Sm
12345	-1.07333	-0.568667	0.404667	0.375	1.11767	0.513333	-0.668667	0.453	0.662333	0.502667	0.597226	0.0363565	0.451042	0.391083	0.315038	0.0794408	0.0363565	0.108424	0.131632	0.251431	1	1	1	1	1	0.666667	0.666667	SmCc
12348	1.047	1.01	1.012	1.018	-1.174	1.027	1.057	1.03	-1.143	-1.153	0.500454	0.888666	0.865302	0.793383	0.0278607	0.692603	0.888666	0.666694	0.0614634	0.047292	1	1	1	1	1	1	1	Sm
12361	1.019	1.093	1.079	-1.172	1.045	1.197	1.113	-1.086	1.251	-1.121	0.859451	0.402066	0.471136	0.142597	0.672799	0.0991031	0.402066	0.434615	0.0440757	0.283459	1	1	1	1	1	1	1	Sm
12362	1.007	-1.199	1.065	1.075	-1.013	1.209	-1.19	1.145	1.194	1.061	0.856134	0.000319365	0.137024	0.0910299	0.74765	0.000202153	0.000319365	0.00377124	0.000406771	0.161333	0	1	0	0	0	0	1	Sm
12366	-1.11	-1.036	-1.087	1.205	1.034	-1.857	-1.149	1.109	-1.796	1.247	0.0595827	0.507947	0.126615	0.00212975	0.522994	1.00172e-09	0.507947	0.0606538	2.35196e-09	0.000517448	1	1	1	1	1	1	1	Sm
12370	-1.0595	1.1245	1.07	0.0175	1.21	-1.1895	1.0615	1.0875	1.0165	1.233	0.405169	0.074011	0.349125	0.757728	0.0214506	0.0318639	0.074011	0.185256	0.781824	0.0233411	1	1	1	1	1	1	1	OoSm
12371	1.161	1.145	-1.177	1.165	1.027	-1.679	1.329	-1.01	-1.635	1.196	0.240541	0.287877	0.203398	0.232121	0.829808	0.000580838	0.287877	0.934281	0.000931851	0.163205	1	1	1	1	1	1	1	Sm
12385	1.09	-1.166	1.181	1.038	1.074	1.494	-1.07	1.226	1.604	1.115	0.25016	0.0480242	0.0339795	0.610998	0.334459	3.3959e-05	0.0480242	0.0116857	4.81815e-06	0.148985	1	1	1	1	1	1	1	OoSm
12387	-1.09	-1.2475	1.393	-1.032	-1.148	1.15	-1.364	1.3485	-0.001	-1.1845	0.559783	0.0765682	0.0114453	0.825209	0.25622	0.3258	0.0765682	0.022842	0.425476	0.160307	1	1	1	1	1	1	1	OoSm
12388	1.002	1.075	1.014	-1.028	-1.095	1.057	1.077	-1.014	-1.036	-1.126	0.96165	0.135401	0.774484	0.557789	0.065784	0.249689	0.135401	0.76274	0.44931	0.0200902	0	0	0	1	0	0	0	OoSm
12389	1.257	-5.409	2.344	1.553	-1.503	1.363	-4.303	3.641	-1.103	1.033	0.0721816	7.51491e-11	1.63934e-06	0.0018083	0.0032748	0.018959	7.51491e-11	4.63062e-09	0.420896	0.787792	1	1	1	1	1	1	1	SmCcMr
12393	-1.028	1.009	1.021	-1.004	-1.005	1.316	-1.019	1.017	1.309	-1.009	0.379849	0.770928	0.511439	0.897107	0.874786	6.7689e-08	0.770928	0.596604	8.72907e-08	0.774392	0	0	0	0	0	0	1	SmCcMr
12394	-1.036	1.035	1.014	-1.197	1.047	1.095	1	-1.18	1.147	-1.143	0.516011	0.52045	0.796367	0.0034017	0.400618	0.102191	0.52045	0.00599014	0.0190662	0.0212294	1	1	1	1	1	1	1	SmCcMr
12396	-0.0075	1.0325	-0.011	-0.0215	-0.0115	-0.011	0.0255	-1.0315	-1.0225	-1.0325	0.430743	0.471524	0.410459	0.318516	0.462827	0.67241	0.471524	0.512052	0.606181	0.518954	0.5	0	0.5	0.5	0	0	0	Sm
12398	1.009	1.171	-1.114	-1.024	1.04	1.113	1.181	-1.14	1.158	1.016	0.841992	0.00220237	0.0250019	0.598718	0.382341	0.0253474	0.00220237	0.00814619	0.00380652	0.722896	0	0	1	0	0	0	1	SmCcMr
12400	1.046	0.353	0.480333	0.364333	1.22767	-0.321667	1.06633	1.182	1.23933	1.264	0.57397	0.564296	0.395555	0.719224	0.057131	0.481662	0.564296	0.279425	0.0929873	0.0245735	0.666667	1	0.666667	0.666667	0.666667	1	1	OoSm
12404	1.032	-1.002	-1.202	1.039	-1.236	-1.08	1.03	-1.157	-1.335	-1.19	0.551555	0.976796	0.00221531	0.468197	0.000677215	0.151762	0.976796	0.0109373	2.88925e-05	0.00339149	1	1	1	1	1	0	0	Sm
12408	1.046	1.027	1.251	-1.269	1.036	-1.126	1.074	-1.014	-1.087	-1.224	0.496584	0.683815	0.00274639	0.00172579	0.587267	0.0806003	0.683815	0.833234	0.209489	0.00572164	1	1	1	1	1	1	1	Sm
12411	1.0315	1.478	1.261	-1.2135	1.991	-1.999	1.5245	0.0395	-0.005	1.6405	0.652338	2.20312e-05	0.0037189	0.0112516	1.98852e-08	1.386e-08	2.20312e-05	0.628694	0.838024	1.84171e-06	0	0	1	1	1	1	1	Sm
12412	1.031	1.072	1.004	-1.039	1.093	-1.003	1.105	-1.034	1.089	1.052	0.451749	0.100117	0.917249	0.356295	0.0405557	0.942175	0.100117	0.411057	0.0468579	0.221783	0	0	1	1	0	0	0	SmMur
12419	-1.057	-1.184	1.014	1.352	1.211	-1.565	-1.251	1.371	-1.293	1.637	0.415342	0.0202115	0.833816	0.00027122	0.0100417	3.12809e-06	0.0202115	0.000172376	0.00116936	9.10828e-07	1	1	1	1	1	1	1	Sm
12443	1.12833	-2.576	1.174	1.36067	-1.19233	1.58	-2.26433	1.603	1.32333	0.472333	0.087593	1.48164e-10	0.0237596	0.00366137	0.0181371	3.44785e-05	1.48164e-10	7.26986e-06	0.0760898	0.131379	1	1	0.666667	1	1	0.666667	1	Sm
12444	-1.071	-2.042	1.317	1.524	-1.263	-1.69	-2.187	2.007	-2.135	1.206	0.842691	0.0513061	0.43007	0.2329	0.501476	0.141676	0.0513061	0.0565931	0.0396525	0.589367	1	1	1	1	1	1	1	OoSm
12445	-1.309	-3.002	1.263	1.066	-1.167	1.297	-3.929	1.347	1.112	-1.094	0.00810538	7.25288e-10	0.0186881	0.484592	0.104249	0.0100541	7.25288e-10	0.00409569	0.254782	0.330518	1	1	1	1	1	1	1	SmMur
12447	1.034	-1.035	1.049	-1.071	1.083	-1.092	-1.001	-1.02	-1.008	1.012	0.553667	0.538904	0.395803	0.232565	0.165067	0.129027	0.538904	0.718348	0.886619	0.834082	1	1	1	1	1	1	1	OoSm
12448	1.145	1.273	-1.228	1.077	1.25	-1.438	1.457	-1.14	-1.15	1.346	0.0256971	0.000431758	0.00176285	0.199343	0.000867189	4.8281e-06	0.000431758	0.0300445	0.0216743	5.10606e-05	1	1	1	1	1	1	1	OoSm
12450	-0.0195	-1.2985	1.157	1.0705	1.3625	1.135	-1.325	1.24	1.5525	1.46	0.806683	0.0014285	0.455736	0.3367	0.00802092	0.0960603	0.0014285	0.141238	0.000280104	0.000950933	1	1	1	1	1	1	1	OoSm
12452	-1.018	1.031	1.445	-1.389	-1.042	1.411	1.013	1.04	1.354	-1.447	0.83117	0.715294	0.000342503	0.000950145	0.626595	0.000638037	0.715294	0.642537	0.00187046	0.000326069	0	0	0	1	0	0	1	SmMur
12454	-1.022	-1.155	1.007	1.03	1.01	-1.035	-1.18	1.037	-1.025	1.04	0.684436	0.0131501	0.899639	0.574602	0.852024	0.518685	0.0131501	0.493193	0.644568	0.456665	1	0	0	0	0	0	0	Sm
12455	-1.202	1.095	1.444	-1.443	1.028	-1.142	-1.098	1.001	-1.11	-1.403	0.382871	0.664399	0.0920007	0.0925817	0.89359	0.527902	0.664399	0.997279	0.617544	0.118042	1	1	1	1	1	1	1	OoSm
12457	1.2775	1.4885	-0.133	-1.435	-1.0925	-1.271	1.8705	-1.5765	-1.387	-1.566	0.420482	0.0344134	0.172437	0.043437	0.487557	0.168938	0.0344134	0.0211689	0.036959	0.007114	1	1	1	1	1	1	0.5	Sm
12460	-1.328	-1.112	1.15	-1.046	1.158	-1.109	-1.476	1.099	1.044	1.107	0.00806672	0.278943	0.158089	0.63996	0.139497	0.287619	0.278943	0.331248	0.656696	0.297873	1	1	1	1	1	1	1	Sm
12462	-1.022	-1.173	1.097	1.149	1.347	-1.074	-1.199	1.26	1.254	1.547	0.836315	0.149569	0.39404	0.207114	0.0118164	0.508845	0.149569	0.0430673	0.0467882	0.00069649	1	1	1	1	1	1	1	Sm
12464	1.252	-1.064	1.116	1.069	-1.124	1.021	1.176	1.194	-1.101	-1.051	0.0516584	0.569643	0.320327	0.541327	0.293257	0.85049	0.569643	0.11788	0.384244	0.65052	1	1	1	1	1	1	1	OoSm
12465	-1.034	1.042	1.103	-1.122	-1.04	1.017	1.008	-1.017	-1.023	-1.167	0.433895	0.335115	0.0307768	0.0132921	0.359923	0.694251	0.335115	0.688615	0.595489	0.00175804	0	0	0	1	0	0	0	Sm
12468	1.033	1.036	-1.058	1.059	-1.021	-1.025	1.07	1	-1.047	1.037	0.453202	0.414847	0.197084	0.194391	0.622969	0.563875	0.414847	0.993295	0.291188	0.407019	0	1	1	0	1	0	0	OoSm
12469	-1.007	-1.152	1.239	1.072	1.139	-1.501	-1.16	1.328	-1.318	1.221	0.940527	0.132241	0.0281441	0.448285	0.163926	0.000285388	0.132241	0.00551932	0.00663583	0.0394102	1	1	1	1	1	1	1	Sm
12475	-1.017	-1.214	1.08	1.013	-1.007	1.11	-1.235	1.095	1.102	1.006	0.68316	0.000221795	0.0800945	0.75448	0.865617	0.0220888	0.000221795	0.043671	0.0313167	0.885617	1	1	0	0	0	0	1	Sm
12476	-1.122	0.348333	1.09833	-1.21867	1.19033	1.952	-1.106	-1.111	2.319	-0.358333	0.228644	0.85134	0.29641	0.0424624	0.0826777	5.47934e-07	0.85134	0.34776	2.32065e-08	0.721229	1	1	1	1	1	1	1	Sm
12479	-1.049	1.608	1.086	-1.192	1.173	-1.147	1.532	-1.098	1.023	-1.016	0.547831	1.28351e-05	0.307732	0.038895	0.0573657	0.0980002	1.28351e-05	0.251873	0.777157	0.844303	1	1	1	1	1	1	1	OoSm
12490	1.017	-1.339	1.193	1.18	-1.173	1.338	-1.316	1.408	1.141	1.006	0.793893	0.000279908	0.0134038	0.0195309	0.0237449	0.000284678	0.000279908	5.40561e-05	0.0547185	0.925367	1	1	1	1	1	1	1	SmMur
12492	1.035	1.038	1.141	1.04	1.451	1.053	1.074	1.187	1.528	1.508	0.547694	0.507145	0.0291104	0.492761	3.6924e-06	0.364277	0.507145	0.00672318	6.78854e-07	1.02193e-06	1	1	1	1	1	1	1	OoSm
12497	-1.074	1.017	-1.037	-1.039	1.148	-1.179	-1.056	-1.077	-1.027	1.105	0.105924	0.686106	0.399203	0.371857	0.00427816	0.00107424	0.686106	0.0925917	0.532885	0.0294753	1	1	1	1	1	1	0	Sm
12499	-1.021	0.0155	0.0005	0.0115	1.1495	0.021	-1.005	0.012	1.1745	1.1655	0.656501	0.720081	0.389949	0.154723	0.00310341	0.509935	0.720081	0.56157	0.00507833	0.0441688	1	1	1	1	1	1	1	SmMur
12505	-1.095	-1.18	1.057	-1.015	-1.041	1.048	-1.292	1.042	1.007	-1.056	0.145135	0.0131979	0.364212	0.810749	0.512892	0.441977	0.0131979	0.500053	0.906749	0.37474	1	1	0	0	0	0	0	SmMur
12509	1.133	-1.62	1.276	1.12	-1.077	1.538	-1.43	1.429	1.428	1.04	0.211177	0.000107045	0.0216161	0.256847	0.452471	0.000335901	0.000107045	0.00176417	0.00177385	0.691024	1	1	1	1	1	1	1	SmMur
12512	0.356	-1.83633	1.458	1.10533	-0.407333	1.25533	-1.8	1.595	1.173	-0.299667	0.70098	0.000349679	0.00332967	0.496571	0.463537	0.0620576	0.000349679	0.00042089	0.274356	0.361644	1	1	1	1	1	1	1	Sm
12514	1.036	-1.139	-1.018	1.023	1.044	1.048	-1.099	1.005	1.094	1.067	0.421304	0.00806142	0.689201	0.613311	0.33965	0.29817	0.00806142	0.915283	0.0554788	0.152635	0	1	0	0	0	0	0	SmMur
12515	1.032	1.073	1.03	1.109	-1.163	-1.071	1.108	1.142	-1.246	-1.049	0.369918	0.05725	0.412288	0.00848246	0.000425251	0.0652342	0.05725	0.00137861	7.45482e-06	0.184326	0	0	0	0	1	0	0	Sm
12520	1.049	-1.111	1.119	1.111	-1.027	1.051	-1.059	1.244	1.024	1.082	0.57696	0.230946	0.199565	0.22899	0.758054	0.564101	0.230946	0.0193439	0.786483	0.362985	1	1	1	1	1	1	1	Sm
12521	-1.221	-1.34	1.385	-1.07	1.7	-1.614	-1.636	1.295	1.053	1.589	0.11457	0.0257377	0.0146346	0.58106	0.000367623	0.000937825	0.0257377	0.0458436	0.670056	0.00124108	1	1	1	1	1	1	1	Sm
12522	-1.048	-1.072	1.04	1	1.036	1.608	-1.124	1.04	1.666	1.037	0.238696	0.0872161	0.326067	0.994669	0.367876	6.32527e-10	0.0872161	0.322926	2.05946e-10	0.364459	0	0	0	0	0	0	1	Sm
12527	-1.161	-1.248	-1.323	-1.283	-1.484	1.18	-1.449	-1.698	-1.257	-1.904	0.140792	0.0349733	0.00999988	0.0195097	0.000772835	0.104339	0.0349733	4.06258e-05	0.0300876	3.96395e-06	1	1	1	1	1	1	1	OoSm
12530	-1.027	1.106	1.076	-1.081	1.055	-1.281	1.077	-1.004	-1.215	-1.025	0.702128	0.164381	0.307242	0.280299	0.454656	0.00237742	0.164381	0.950882	0.0123005	0.730682	1	1	1	1	1	1	1	SmMur
12531	1.009	-1.056	-1.035	1.038	-1.006	-1.152	-1.047	1.003	-1.159	1.032	0.843878	0.22017	0.433333	0.392963	0.886152	0.00437245	0.22017	0.94187	0.00319236	0.474632	1	1	0	0	1	0	0	Sm
12532	1.036	1.127	-0.0265	1.052	1.2565	-1.4445	1.168	1.025	-1.15	1.3205	0.384745	0.0100679	0.638109	0.305384	0.000644446	9.72885e-07	0.0100679	0.544498	0.00333278	1.8696e-05	1	1	1	1	1	1	1	Sm
12534	1.024	-1.476	1.258	1.008	1.15	-1.65	-1.442	1.269	-1.434	1.16	0.858493	0.00876174	0.0988122	0.951206	0.302153	0.00141691	0.00876174	0.0882729	0.0139775	0.275712	1	1	1	1	1	1	1	Sm
12537	-1.279	-1.1275	-1.1765	0.0765	-0.014	-0.0775	-1.443	-0.107	-1.086	1.0565	0.12405	0.108444	0.0449272	0.216581	0.201308	0.339856	0.108444	0.403872	0.260806	0.489602	1	1	1	1	1	1	1	Sm
12539	1.055	-1.068	-1.019	-1.066	1.046	1.072	-1.012	-1.087	1.121	-1.019	0.343268	0.252051	0.733418	0.262818	0.42926	0.226062	0.252051	0.150818	0.0544014	0.73187	1	1	1	1	1	1	1	Sm
12540	-1.112	-1.332	1.328	-1.041	-1.075	1.25	-1.48	1.275	1.163	-1.119	0.275828	0.0073074	0.00782419	0.672326	0.452735	0.0295021	0.0073074	0.0193526	0.126353	0.247001	1	1	1	1	1	1	1	OoSmMur
12544	1.128	1.006	-1.096	1.309	1.252	-1.469	1.135	1.194	-1.173	1.639	0.053424	0.920697	0.134132	0.00024006	0.00123991	4.43707e-06	0.920697	0.00718558	0.0140388	1.57733e-07	1	1	1	1	1	1	1	Sm
12545	1.062	1.139	-1.175	1.179	1.165	-1.643	1.21	1.004	-1.411	1.374	0.470702	0.128331	0.0644284	0.0592966	0.0781756	1.17881e-05	0.128331	0.9657	0.000573708	0.00115937	1	1	1	1	1	1	1	Sm
12550	1.088	1.565	-1.207	-1.03	-1.55	-1.177	1.703	-1.243	-1.825	-1.597	0.314746	3.90963e-05	0.0336747	0.722688	4.98397e-05	0.061663	3.90963e-05	0.0161031	1.06429e-06	2.3948e-05	1	1	1	1	1	1	0	Sm
12552	0.011	-1.101	0.0195	0.0095	0.018	1.012	-1.089	1.029	1.03	1.027	0.674172	0.0924794	0.577781	0.470011	0.69913	0.819908	0.0924794	0.589531	0.598425	0.632144	1	0.5	0	0	0	0	0	Sm
12556	-1.108	-1.102	1.008	-1.004	-1.001	1.001	-1.221	1.004	1	-1.004	0.00862556	0.0125815	0.820948	0.918062	0.985861	0.987113	0.0125815	0.901648	0.998747	0.904018	1	0	0	0	0	0	0	Sm
12558	-1.074	1.0535	-1.017	-1.0265	1.203	-1.1385	-1.019	-1.044	1.0565	1.174	0.12275	0.236662	0.682816	0.559517	0.000487244	0.0121496	0.236662	0.311719	0.174294	0.00888176	0.5	0.5	0.5	0.5	0.5	1	0.5	OoSmCc
12560	0.0135	0.008	-1.114	-1.024	-1.2015	1.0635	1.021	-1.1405	-1.129	-1.23	0.567622	0.619432	0.0968786	0.622941	0.00525308	0.222926	0.619432	0.0364807	0.0504614	0.00160612	1	1	1	0.5	0.5	0	0.5	Sm
12562	1.019	-1.226	1.048	1.022	1.108	1.028	-1.202	1.071	1.139	1.133	0.685895	0.000425522	0.332817	0.640578	0.0415291	0.565373	0.000425522	0.159213	0.012527	0.0158053	1	1	0	0	0	0	1	Sm
12566	-0.386333	0.423667	-0.303667	-0.416667	1.30767	-1.23767	1.035	-0.384333	0.395333	1.21267	0.463327	0.362651	0.684974	0.332966	0.0067897	0.098955	0.362651	0.424935	0.243473	0.140339	1	1	1	1	1	1	1	OoSm
12568	-1.175	1.152	-1.05	-1.001	-1.198	1.081	-1.02	-1.051	-1.108	-1.199	0.0127617	0.0257983	0.41383	0.987957	0.00628766	0.19492	0.0257983	0.405515	0.0954031	0.00608423	1	1	1	1	1	1	1	Sm
12569	1.047	1.04	1.077	1.094	1.365	-1.273	1.089	1.179	1.072	1.493	0.672539	0.718881	0.494722	0.41047	0.00959558	0.0368984	0.718881	0.141534	0.522718	0.00155242	1	1	1	1	1	1	1	SmCcMr
12571	-1.014	-1.044	1.051	-1.01	1.034	-1.058	-1.058	1.041	-1.023	1.024	0.80119	0.42883	0.353846	0.859001	0.531471	0.299459	0.42883	0.45024	0.67157	0.652454	1	1	0	0	0	0	0	Sm
12575	1.05	-1.131	1.043	-1.033	1.121	1.134	-1.077	1.01	1.271	1.084	0.367306	0.0311286	0.429136	0.539363	0.04413	0.0277837	0.0311286	0.856524	0.000264998	0.140222	1	1	0	0	0	1	1	SmCcMr
12576	-1.106	-1.413	1.01	-1.002	1.119	1.486	-1.563	1.008	1.663	1.117	0.109291	2.03387e-05	0.871034	0.977126	0.0760115	3.95756e-06	2.03387e-05	0.893638	1.42755e-07	0.0802282	1	1	1	1	1	1	1	Sm
12577	-1.231	-4.06	1.137	-1.141	-1.581	1.376	-4.998	-1.003	-1.149	-1.803	0.174898	2.99099e-08	0.394405	0.382416	0.00623487	0.0442384	2.99099e-08	0.982018	0.357183	0.000892777	1	1	1	1	1	1	1	SmMur
12578	-1.0965	-1.437	-1.053	1.0355	-1.0165	1.028	-1.5775	-1.0165	0.0115	0.019	0.0919731	5.61531e-06	0.443612	0.592256	0.673442	0.512331	5.61531e-06	0.727494	0.73785	0.301028	1	1	0	0	0	0	0	OoSm
12580	1.054	-1.262	1.11	1.281	-1.001	1.005	-1.197	1.421	1.004	1.28	0.460452	0.00383459	0.153325	0.0024026	0.991389	0.942319	0.00383459	9.70414e-05	0.950909	0.00246045	1	1	1	1	1	1	1	Sm
12585	1.185	2.21	-1.154	1.055	-1.216	-1.224	2.618	-1.094	-1.489	-1.152	0.013797	3.42322e-10	0.0330428	0.395827	0.00563899	0.00444789	3.42322e-10	0.165672	6.01303e-06	0.0347479	1	1	1	1	1	1	1	OoSm
12587	-1.019	1.147	-1.083	-1.027	1.052	1.211	1.126	-1.112	1.274	1.025	0.785903	0.0593677	0.256165	0.699574	0.461643	0.0118711	0.0593677	0.135388	0.00235243	0.722781	1	1	1	1	1	1	1	Sm
12589	-1.087	-1.0515	-1.0695	-1.055	0.023	-1.1145	-1.142	-1.1265	-1.0935	-1.032	0.198854	0.460316	0.353119	0.437416	0.408316	0.096955	0.460316	0.0463063	0.449532	0.595631	1	1	1	1	1	1	1	Sm
12593	-1.041	1.08	-1.259	-1.09	-1.063	1.069	1.037	-1.372	1.005	-1.158	0.604645	0.327215	0.00748146	0.273311	0.434572	0.395278	0.327215	0.000644651	0.943575	0.0701202	1	1	1	1	1	1	1	Sm
12606	1	1.008	1.102	-1.016	1.201	1.103	1.008	1.085	1.325	1.182	0.998184	0.856403	0.0303643	0.704176	0.000365388	0.0292495	0.856403	0.0646502	2.99799e-06	0.000840971	0	0	0	0	0	1	1	Sm
12608	1.031	-1.13	1.645	-1.86	1.826	2.545	-1.096	-1.13	4.649	-1.018	0.886635	0.570638	0.0305863	0.00918028	0.0110068	0.000369333	0.570638	0.569738	1.27379e-06	0.932804	1	1	1	1	1	1	1	SmCc
12615	1.364	1.177	-1.214	1.224	1.158	-1.429	1.605	1.008	-1.234	1.417	0.00364295	0.0958461	0.0505124	0.0426677	0.130414	0.00122783	0.0958461	0.932108	0.0357975	0.00148898	1	1	1	1	1	1	1	Sm
12616	1.242	-1.286	-1.099	1.349	-1.243	1.148	-1.036	1.228	-1.083	1.085	0.17007	0.114053	0.541271	0.0639493	0.168577	0.374516	0.114053	0.19227	0.605719	0.594016	1	1	1	1	1	1	1	Sm
12626	-1.011	-1.083	1.212	1.136	-1.045	-1.186	-1.095	1.377	-1.239	1.087	0.92251	0.48995	0.107816	0.276173	0.702068	0.150774	0.48995	0.0117163	0.0753972	0.471749	1	1	1	1	1	1	1	Sm
12630	-1.013	1.079	1.036	-1.081	-1.085	-1.021	1.065	-1.044	-1.108	-1.173	0.805889	0.169539	0.512613	0.159813	0.142412	0.700708	0.169539	0.434088	0.0705669	0.00790241	0	0	1	1	1	0	0	Sm
12632	-1.012	-1.236	-1.022	1.081	1.005	1.001	-1.251	1.058	1.005	1.086	0.831347	0.00180419	0.707191	0.190867	0.936572	0.989273	0.00180419	0.340695	0.925888	0.167158	1	1	1	1	1	1	1	Sm
12640	-1.098	-1.133	1.045	-1.027	-1.007	1.003	-1.245	1.017	-1.003	-1.034	0.0116827	0.00154217	0.204474	0.428056	0.842052	0.919868	0.00154217	0.618272	0.92133	0.324664	1	0	0	0	0	0	0	Sm
12648	1.007	-1.0145	1.101	-0.028	1.0295	1.107	-1.0075	1.0725	1.1395	0.003	0.894785	0.783405	0.110566	0.384527	0.612563	0.0609753	0.783405	0.238531	0.0257419	0.177055	1	1	0.5	0.5	1	1	1	SmCcMr
12649	-1.054	1.269	1.038	-1.171	-1.228	-1.055	1.204	-1.128	-1.296	-1.438	0.655185	0.0554369	0.748747	0.190578	0.0943588	0.647634	0.0554369	0.313952	0.0389547	0.00602346	1	1	1	1	1	1	0	OoSmCc
12651	-1.215	1.006	1.072	-1.121	1.143	-1.032	-1.208	-1.045	1.107	1.02	0.005768	0.925719	0.27394	0.0831696	0.0451883	0.614534	0.925719	0.487278	0.117598	0.752263	1	1	1	1	1	1	1	Sm
12652	-1.0105	1.101	-0.06	-1.0585	-1.046	0.009	1.0895	-1.1215	-1.037	-1.1075	0.789068	0.0440218	0.436993	0.17986	0.260987	0.705646	0.0440218	0.0620513	0.377513	0.017852	0	0	0.5	0.5	0	0	0	Sm
12660	1.036	1.101	1.004	-1.061	1.091	1.287	1.141	-1.057	1.405	1.029	0.644517	0.216042	0.960602	0.440235	0.259464	0.00367404	0.216042	0.469295	0.000293993	0.711362	1	1	1	1	1	1	1	Sm
12667	1.047	-1.647	1.035	1.055	-1.036	1.148	-1.573	1.092	1.109	1.018	0.5613	5.72767e-06	0.660839	0.499945	0.655076	0.0908727	5.72767e-06	0.271769	0.198639	0.817343	1	1	0	0	0	0	1	Sm
12675	-1.037	-1.13	1.096	-1.018	-1.029	1.329	-1.172	1.077	1.291	-1.047	0.670194	0.167604	0.293888	0.835893	0.740933	0.00368209	0.167604	0.394975	0.00759071	0.591875	1	1	1	1	1	1	1	OoSmMur
12696	-1.218	1.103	-1.376	-1.271	-1.223	-1.407	-1.104	-1.749	-1.72	-1.554	0.0712369	0.353072	0.00633186	0.0317417	0.0664281	0.00397482	0.353072	4.27283e-05	5.96466e-05	0.000481695	1	1	1	1	1	1	1	Sm
12700	-1.031	-1.374	1.231	-1.257	-1.325	9.382	-1.416	-1.021	7.082	-1.665	0.580756	1.69958e-05	0.00125504	0.000537818	6.73577e-05	1.3717e-18	1.69958e-05	0.700635	1.32122e-17	3.28749e-08	1	1	1	1	1	1	1	SmCcMr
12702	3.267	1.085	-1.102	-1.187	-1.103	1.312	3.544	-1.309	1.19	-1.31	0.00129163	0.794891	0.756065	0.58438	0.753588	0.389493	0.794891	0.394648	0.58008	0.392891	1	1	1	1	1	1	1	OoSmMur
12705	-1.065	-1.046	-1.044	1.011	1.035	1.214	-1.114	-1.032	1.257	1.047	0.218788	0.367371	0.396073	0.824787	0.490856	0.00103158	0.367371	0.527032	0.000226381	0.365877	1	1	0	0	0	0	1	SmCc
12721	-1.074	-1.327	1.084	1.008	1.012	1.156	-1.425	1.093	1.17	1.02	0.0958269	2.33872e-06	0.0648438	0.839516	0.77845	0.002375	2.33872e-06	0.0436157	0.00127591	0.629367	1	1	0	0	0	0	1	Sm
12723	-1.2385	-1.1195	1.051	1.0475	-1.092	1.328	-1.3885	1.1005	1.2175	-0.044	0.00375883	0.166425	0.440597	0.541216	0.199028	0.000850086	0.166425	0.156999	0.0383245	0.568521	1	0.5	0	0	0.5	0	1	Sm
12724	-1.045	1.428	-1.097	-1.291	-1.138	-1.045	1.367	-1.416	-1.189	-1.469	0.488193	2.4076e-05	0.155894	0.000735629	0.0530112	0.486911	2.4076e-05	3.2238e-05	0.0125481	9.88115e-06	1	1	1	1	1	1	0	Sm
12725	0.033	1.1975	0.0875	-0.0115	1.282	-0.0095	1.2355	1.07	1.2705	1.274	0.637629	0.0672618	0.332143	0.134842	0.0160808	0.899895	0.0672618	0.466176	0.0236909	0.0821389	1	1	1	1	1	1	1	OoSm
12729	-0.327667	0.284667	-1.03933	1.15633	1.053	-0.591667	-1.04	1.11167	-0.527	1.21767	0.412803	0.553849	0.612527	0.129607	0.509329	0.187518	0.553849	0.192115	0.0557722	0.0479161	1	1	1	1	1	1	1	Sm
12739	-1.038	1.067	1.035	-1.149	-1.067	1.166	1.028	-1.11	1.093	-1.226	0.545753	0.293993	0.576382	0.0335517	0.295972	0.0205275	0.293993	0.0994948	0.158343	0.00347143	0	0	1	0	0	0	0	Sm
12741	1.53	-3.865	2.527	1.652	-1.699	1.433	-2.527	4.175	-1.185	-1.029	0.06222	7.20183e-06	0.000430754	0.0306841	0.0234675	0.109278	7.20183e-06	3.61719e-06	0.435505	0.896446	1	1	1	1	1	1	1	Sm
12747	1.075	1.365	1.343	-1.313	-1.077	-1.228	1.467	1.023	-1.322	-1.414	0.509299	0.0101403	0.0137858	0.021461	0.498973	0.0736637	0.0101403	0.833802	0.0187758	0.00498207	1	1	1	1	1	1	1	Sm
12750	-0.301667	1.21333	1.28	-1.152	-0.401333	0.358	1.242	1.11333	0.285	-1.228	0.586956	0.393179	0.0578234	0.251284	0.620059	0.532332	0.393179	0.400053	0.433705	0.115179	1	1	1	1	1	1	1	Sm
12751	-1.115	1.476	-1.015	1.096	-1.298	1.193	1.324	1.08	-1.089	-1.185	0.152148	5.046e-05	0.841206	0.22505	0.00220768	0.0264605	5.046e-05	0.305963	0.258492	0.0317273	1	1	1	1	1	1	1	OoSm
12752	1.035	1.341	-1.288	1.38	-1.098	-1.646	1.387	1.071	-1.807	1.257	0.845984	0.108839	0.162048	0.0804487	0.596388	0.0104249	0.108839	0.69633	0.00327165	0.204672	1	1	1	1	1	1	1	OoSm
12753	1.014	1.167	-1.01	1.158	-1.016	1.076	1.184	1.146	1.06	1.14	0.78644	0.00846965	0.846782	0.0117137	0.767723	0.174572	0.00846965	0.0176625	0.279641	0.0218892	1	1	1	1	1	1	1	Sm
12757	-1.174	1.035	1.068	-1.051	1.076	-1.181	-1.134	1.016	-1.098	1.024	0.0626835	0.672833	0.423589	0.542068	0.374807	0.0537826	0.672833	0.845589	0.26193	0.775909	1	1	1	1	1	1	1	Sm
12759	1.668	1.206	1.257	-1.113	-1.084	1.704	2.011	1.129	1.572	-1.206	0.000115514	0.0866939	0.0400725	0.311287	0.446452	7.51927e-05	0.0866939	0.25463	0.000391154	0.0859094	1	1	1	1	1	1	1	Sm
12764	-1.774	-1.012	-1.369	1.041	1.259	1.117	-1.795	-1.315	1.407	1.311	0.000356583	0.926611	0.0262337	0.761128	0.0916973	0.401596	0.926611	0.0485231	0.016902	0.0512996	1	1	1	1	1	1	1	Sm
12767	-1.121	-1.127	1.165	1	-1.09	1.808	-1.263	1.165	1.658	-1.091	0.0798596	0.0674611	0.0227148	0.996468	0.174977	2.40091e-08	0.0674611	0.0229248	2.26418e-07	0.173685	1	0	0	0	0	0	1	SmCc
12793	-1.085	1.11	-1.071	1.061	1.129	-1.016	1.023	-1.01	1.111	1.198	0.464414	0.35297	0.534615	0.59163	0.281683	0.883668	0.35297	0.931643	0.348907	0.1155	1	1	1	1	1	1	1	Sm
12795	1.344	-1.032	1.185	-1.398	-1.17	1.421	1.302	-1.18	1.215	-1.635	0.0674545	0.837991	0.278942	0.0409332	0.315223	0.0328098	0.837991	0.289464	0.214919	0.0047342	1	1	1	1	1	1	1	Sm
12798	1.006	-1.374	1.183	1.035	-1.091	1.207	-1.365	1.224	1.107	-1.054	0.938301	0.000900901	0.0489696	0.672576	0.287281	0.0292583	0.000900901	0.0206744	0.217208	0.512804	1	1	0	1	1	1	1	Sm
12799	-1.006	1.0025	1.0535	-1.071	1.082	-0.0225	-1.004	-1.017	1.059	1.01	0.886634	0.951912	0.253531	0.126731	0.0819512	0.468632	0.951912	0.718786	0.305931	0.835806	1	1	1	1	0.5	1	1	Sm
12807	-0.0105	0.063	-0.1005	0.0805	-1.127	1.0845	0.0575	-0.016	-1.039	-0.049	0.312166	0.398009	0.339837	0.389508	0.233011	0.36827	0.398009	0.774278	0.668363	0.530971	1	1	1	0.5	1	1	1	Sm
12808	-1.034	1.2	-1.187	1.226	1.223	-1.536	1.161	1.032	-1.256	1.499	0.639326	0.0178282	0.0241026	0.00924035	0.0100191	9.90151e-06	0.0178282	0.651951	0.00434457	1.98252e-05	1	1	1	1	1	1	0	SmCcMr
12812	0.0365	-1.0285	-0.012	-1.081	1.031	-1.056	0.0075	-1.0935	-1.024	-1.048	0.405181	0.618365	0.663532	0.253453	0.575284	0.301549	0.618365	0.104658	0.62982	0.412837	1	1	1	1	1	1	1	SmCc
12816	-1.325	-2.736	1.307	-1.048	-1.318	1.106	-3.625	1.247	-1.191	-1.382	0.013492	1.85039e-08	0.017769	0.651173	0.014956	0.335558	1.85039e-08	0.0450264	0.104439	0.00562604	1	1	1	1	1	1	1	Sm
12818	-1.107	-1.037	-1.01	1.023	1.018	1.03	-1.148	1.013	1.048	1.041	0.0155331	0.358006	0.802906	0.564485	0.641944	0.452986	0.358006	0.742366	0.231268	0.303485	1	0	0	0	0	0	0	Sm
12819	-1.201	-1.318	1.404	1.302	-1.407	2.153	-1.584	1.828	1.531	-1.08	0.26661	0.101373	0.0485935	0.116295	0.0473533	0.000164086	0.101373	0.00149215	0.0162289	0.635439	1	1	1	1	1	1	1	Sm
12821	1.036	-1.026	-1.083	1.107	-1.197	1.114	1.01	1.022	-1.075	-1.082	0.559418	0.670759	0.192711	0.102567	0.00708436	0.0845425	0.670759	0.716693	0.236377	0.199845	0	1	1	0	1	0	0	Sm
12822	-1.299	1.08733	-1.246	-1.193	-1.75467	1.87167	-1.19133	-1.49267	1.07233	-2.11167	0.0683166	0.429434	0.267318	0.131758	0.0962807	0.00599604	0.429434	0.0142821	0.408138	0.00417568	1	0.666667	0.666667	0.666667	0.666667	0.333333	0.666667	Sm
12825	-1.113	-2.412	1.567	1.185	-1.486	1.017	-2.684	1.857	-1.461	-1.255	0.591506	0.000302348	0.033973	0.397162	0.058016	0.930373	0.000302348	0.0055335	0.0686504	0.260594	1	1	1	1	1	1	1	OoSm
12825	-1.157	-1.757	1.268	1.239	-1.191	1.159	-2.033	1.57	-1.028	1.04	0.0649349	6.95816e-07	0.00518456	0.0101341	0.0303468	0.0623231	6.95816e-07	1.17453e-05	0.718066	0.603501	1	1	0	1	1	1	1	OoSm
12826	-1.434	-3.131	2.447	1.196	-1.855	2.298	-4.49	2.928	1.238	-1.551	0.0715978	1.21378e-05	0.000177539	0.353297	0.00428766	0.00036367	1.21378e-05	2.46841e-05	0.27058	0.0318261	1	1	1	1	1	1	1	Sm
12827	-1.189	-3.174	2.279	1.313	-1.688	2.156	-3.774	2.992	1.277	-1.285	0.162194	2.21425e-08	2.31873e-06	0.0346572	0.000377765	5.60809e-06	2.21425e-08	4.72844e-08	0.0546082	0.0491881	1	1	1	1	1	1	1	Sm
12828	1.041	1.03	-1.049	1.054	-1.169	-1.015	1.073	1.005	-1.186	-1.109	0.335837	0.469969	0.254613	0.209949	0.00125125	0.72448	0.469969	0.902838	0.000575385	0.0203903	0	1	1	0	1	0	0	Sm
12829	1.045	-1.12	1.032	-1.024	-1.043	1.03	-1.072	1.008	-1.013	-1.068	0.31884	0.0168231	0.471003	0.588409	0.336209	0.503643	0.0168231	0.854886	0.763034	0.141635	0	1	0	0	0	0	0	SmCcMr
12830	-1.191	1.087	1.385	-1.181	-1.083	-1.051	-1.095	1.173	-1.138	-1.278	0.05684	0.339952	0.00137687	0.0682827	0.365314	0.565526	0.339952	0.0788619	0.147811	0.0104496	1	1	1	1	1	1	1	OoSm
12831	1.137	-3.241	1.384	1.277	-1.858	2.388	-2.85	1.767	1.285	-1.456	0.435947	1.20944e-06	0.0594851	0.147627	0.0012814	4.67831e-05	1.20944e-06	0.00252879	0.137668	0.0322259	1	1	1	1	1	1	1	Sm
12832	1.026	-1.246	1.049	1.004	-1.11	1.075	-1.215	1.053	-1.032	-1.106	0.511599	2.47134e-05	0.22736	0.924701	0.015062	0.076959	2.47134e-05	0.195221	0.423376	0.0183893	1	1	0	0	0	0	0	SmCc
12833	-0.354333	-2.005	1.53067	0.337667	-1.69667	1.17867	-2.041	1.497	-1.42833	-1.747	0.207979	0.0274189	0.0666789	0.268507	0.00160618	0.236254	0.0274189	0.00771473	0.0152058	0.0180413	1	1	1	1	1	0.666667	1	Sm
12834	-1.459	-2.653	1.74	-1.083	-1.516	1.033	-3.87	1.606	-1.468	-1.642	0.035213	1.67956e-05	0.00373425	0.634279	0.0219389	0.848491	1.67956e-05	0.0105524	0.0325249	0.0079399	1	1	1	1	1	1	1	Sm
12836	-1.076	-1.112	-1.029	1.004	-1.078	1.074	-1.197	-1.024	-1.003	-1.073	0.0372954	0.00442553	0.397152	0.898975	0.0341489	0.0413087	0.00442553	0.469548	0.924717	0.0440735	1	1	0	0	0	0	0	Sm
12840	-1.108	-1.393	1.109	-1.221	1.016	-2.605	-1.543	-1.101	-2.563	-1.202	0.297375	0.00282512	0.290463	0.0508189	0.867316	1.35652e-08	0.00282512	0.326617	1.74089e-08	0.0702358	1	1	1	1	1	1	0	SmCcMr
12842	-1.568	-4.74	2.245	-1.041	-1.266	1.749	-7.434	2.156	1.382	-1.319	0.151824	7.33113e-05	0.0152591	0.894403	0.441924	0.0794933	7.33113e-05	0.0201829	0.296188	0.369386	1	1	1	1	1	1	1	SmMur
12843	-1.005	-1.304	1.036	1.052	-1.114	1.106	-1.31	1.09	-1.008	-1.06	0.927272	6.29289e-05	0.488074	0.330856	0.046081	0.062222	6.29289e-05	0.105466	0.87803	0.26588	1	1	0	0	0	0	0	SmMur
12845	1.029	-1.011	1.036	-1.037	1.097	5.134	1.018	-1.001	5.633	1.058	0.641211	0.862552	0.564202	0.551313	0.141598	1.72791e-15	0.862552	0.984457	6.88412e-16	0.363608	0	0	0	0	0	0	1	SmMur
12847	1.057	-1.663	-1.082	1.358	1.464	-1.18	-1.573	1.255	1.24	1.988	0.498043	7.38215e-06	0.339034	0.0013811	0.000185832	0.0546971	7.38215e-06	0.0115144	0.0157067	1.40449e-07	1	1	1	1	1	1	1	SmMur
12848	1.164	-1.145	1.146	-1.074	-1.041	1.159	1.016	1.067	1.113	-1.118	0.103993	0.142862	0.142272	0.432172	0.653849	0.11326	0.142862	0.472919	0.241612	0.224313	1	1	1	1	1	1	1	Sm
12850	-1.046	1.022	-1.218	1.14	1.081	-1.24	-1.024	-1.069	-1.148	1.232	0.724199	0.866262	0.135797	0.312812	0.54545	0.105773	0.866262	0.605969	0.290398	0.115801	1	1	1	1	1	1	1	Sm
12854	-1.059	1.07	-1.101	1.027	1.064	-1.119	1.01	-1.072	-1.051	1.093	0.134212	0.0805538	0.0171278	0.478089	0.104676	0.00672842	0.0805538	0.072327	0.188727	0.0259428	1	0	0	0	0	0	0	Sm
12856	1.012	-1.051	-1.028	1.169	1.106	1.555	-1.039	1.138	1.72	1.293	0.912915	0.649397	0.803118	0.165616	0.362477	0.000757754	0.649397	0.24834	0.000102795	0.0289995	1	1	1	1	1	1	1	Sm
12857	1.036	-1.169	-1.04	1.054	1.013	-1.017	-1.128	1.013	-1.004	1.068	0.671767	0.0752666	0.638581	0.535365	0.873681	0.837522	0.0752666	0.87908	0.963192	0.438092	1	1	1	1	1	1	1	Sm
12858	-1.143	-1.073	1.098	-1.154	1.014	1.178	-1.227	-1.051	1.194	-1.138	0.198222	0.48711	0.361001	0.16884	0.891465	0.119346	0.48711	0.624686	0.0931753	0.211434	1	1	1	1	1	1	1	OoSm
12859	-1.052	-1.221	-1.059	1.039	1.164	1.036	-1.285	-1.02	1.206	1.209	0.465924	0.00934167	0.409862	0.583047	0.0402562	0.610515	0.00934167	0.778826	0.0139615	0.012818	1	1	1	1	1	1	1	Sm
12861	-1.191	-1.141	1.087	0.044	1.2715	1.325	-1.351	1.131	1.684	1.329	0.0792645	0.318326	0.472505	0.553778	0.00599121	0.00284095	0.318326	0.138071	5.06229e-06	0.00336015	1	1	1	1	1	1	1	Sm
12862	1.075	1.67	-1.306	-1.056	-1.196	-1.146	1.795	-1.379	-1.371	-1.263	0.554504	0.000488379	0.0392309	0.6533	0.152881	0.26857	0.000488379	0.0154565	0.0171697	0.0673824	0	0	1	1	1	0	0	Sm
12864	-1.026	-1.321	1.612	-1.156	-1.488	-1.13	-1.356	1.395	-1.681	-1.72	0.900215	0.189549	0.0315568	0.487445	0.0677297	0.557445	0.189549	0.120899	0.0207174	0.0164503	1	1	1	1	1	1	1	Sm
12865	-1.107	-1.478	1.042	1.098	1.031	1.235	-1.636	1.144	1.273	1.131	0.211202	0.000108747	0.60577	0.249122	0.703092	0.0151108	0.000108747	0.103704	0.0066453	0.132286	1	1	1	1	1	1	1	SmMur
12866	1	-1.161	1.08	1.139	-1.017	-1.146	-1.161	1.23	-1.165	1.12	0.994978	0.0425749	0.275947	0.073386	0.808734	0.0625207	0.0425749	0.00748033	0.0387918	0.114769	1	1	1	1	1	1	1	Sm
12867	1.034	-1.192	1.115	1.114	1.003	-1.115	-1.153	1.243	-1.112	1.118	0.689926	0.0456903	0.19876	0.201623	0.971056	0.198483	0.0456903	0.0162854	0.210521	0.189994	1	1	1	1	1	1	1	Sm
12868	-1.038	-1.188	1.251	-1.107	1.234	1.118	-1.234	1.131	1.379	1.115	0.624778	0.035611	0.00860967	0.197407	0.0127732	0.15929	0.035611	0.122229	0.000533346	0.167982	1	1	1	1	1	1	1	Sm
12870	-1.034	-1.004	-1.022	-1.024	1.099	1.077	-1.038	-1.046	1.184	1.074	0.451699	0.923689	0.617779	0.598757	0.0437472	0.106256	0.923689	0.310859	0.00118856	0.11898	1	1	0	0	0	0	1	SmCc
12873	1.021	-1.5035	-0.0015	-1.0105	1.0175	-0.003	-1.473	-1.0125	1.0145	1.0065	0.709529	6.16165e-06	0.978066	0.844136	0.753205	0.940357	6.16165e-06	0.822562	0.791018	0.905727	1	1	0	0	0	0	0	Sm
12874	-0.016	1.129	-1.097	1.0615	-1.125	-1.132	1.111	-1.0335	-1.274	-1.06	0.46013	0.0697045	0.179775	0.327987	0.0600884	0.0710196	0.0697045	0.578318	0.00126504	0.38783	1	1	1	0.5	1	1	0	SmCc
12877	1.139	-1.096	-1.089	-1.157	-1.5	-1.159	1.039	-1.26	-1.738	-1.736	0.0677868	0.188147	0.218781	0.042414	1.19726e-05	0.0410684	0.188147	0.00291543	2.17341e-07	2.23363e-07	1	1	1	1	1	0	0	Sm
12889	1.006	1.045	-1.027	1.049	1.013	23.401	1.052	1.021	23.701	1.062	0.947678	0.6442	0.780396	0.619771	0.893774	5.02917e-17	0.6442	0.826861	4.7002e-17	0.530106	0	0	0	0	0	0	1	SmCc
12890	-1.085	-1.146	1.068	1.022	-1.116	-1.05	-1.244	1.091	-1.171	-1.092	0.121416	0.0145657	0.208668	0.67456	0.0434118	0.348606	0.0145657	0.100975	0.00588259	0.0972948	1	1	1	1	1	0	0	Sm
12896	-1.161	1.44	-1.072	-1.09	1.069	1.379	1.241	-1.168	1.474	-1.02	0.189117	0.0038396	0.534643	0.438711	0.54761	0.00904886	0.0038396	0.171722	0.00241159	0.859752	1	1	1	1	1	1	1	SmCcMr
12903	1.019	-1.955	1.008	1.012	-1.036	-1.023	-1.918	1.02	-1.059	-1.024	0.843374	1.53153e-06	0.929884	0.900292	0.711496	0.814212	1.53153e-06	0.831188	0.546841	0.806405	1	1	0	0	0	0	0	Sm
12904	1.012	1.107	1	1.073	2.099	-1.138	1.12	1.073	1.844	2.252	0.865379	0.157305	0.99683	0.321385	4.96931e-09	0.0767641	0.157305	0.323243	8.21319e-08	1.26199e-09	0	0	1	0	1	1	1	OoSm
12908	-1.111	-1.075	1.176	-1.031	1.126	1.104	-1.194	1.141	1.243	1.092	0.0687972	0.201656	0.00814669	0.582632	0.0430607	0.084652	0.201656	0.0262527	0.000889546	0.122356	1	1	1	1	1	1	1	Sm
12909	-1.128	1.078	-1.194	1.09	1.184	-1.033	-1.047	-1.095	1.146	1.29	0.0213815	0.134819	0.00168977	0.0881701	0.00244719	0.500229	0.134819	0.0727278	0.0107678	5.14869e-05	1	1	1	1	1	1	1	Sm
12912	-1.016	-1.007	1.011	1.032	1.059	-1.065	-1.023	1.043	-1.006	1.093	0.656954	0.845613	0.766328	0.379035	0.121657	0.0904971	0.845613	0.244622	0.870528	0.0214535	0	0	0	0	0	1	0	SmCcMr
12913	1.151	-1.393	1.316	1.055	1.373	1.387	-1.211	1.388	1.905	1.448	0.158784	0.00284937	0.0103332	0.584377	0.00396566	0.00315492	0.00284937	0.00311888	3.26922e-06	0.00118162	1	1	1	1	1	1	1	Sm
12915	1.173	-1.493	-1.153	1.18	1.273	-1.057	-1.273	1.023	1.204	1.501	0.331172	0.0225158	0.385237	0.3157	0.149902	0.733371	0.0225158	0.88831	0.261418	0.0210396	1	1	1	1	1	1	1	Sm
12916	1.02867	-0.346333	1.11667	-0.36	-0.350667	1.21833	0.349333	1.08933	1.197	-1.04433	0.662751	0.633228	0.113678	0.503485	0.7686	0.0109712	0.633228	0.301273	0.0125276	0.463888	0.333333	0.666667	0.333333	0.666667	0	0.333333	1	Sm
12927	1.09	-1.155	-1.009	1.045	-1.022	1.087	-1.06	1.036	1.064	1.023	0.201277	0.0392126	0.893606	0.506584	0.743052	0.214906	0.0392126	0.594354	0.352949	0.734113	1	1	1	1	1	1	1	SmMur
12928	0.288333	-0.457333	0.478333	-1.04667	1.04767	1.033	-0.527667	-0.239	1.082	0.333667	0.246688	0.43815	0.314667	0.393951	0.486375	0.660266	0.43815	0.279008	0.275795	0.68232	0.333333	1	0.666667	0.333333	0.333333	0.333333	0.333333	SmCc
12929	-1.054	1.099	-1.084	1.033	1.134	-1.065	1.043	-1.049	1.064	1.172	0.481971	0.216116	0.289956	0.661114	0.106766	0.40312	0.216116	0.526863	0.409596	0.0462931	1	1	1	1	1	1	1	SmCc
12934	-1.039	-2.081	1.445	-1.006	-1.04	1.223	-2.162	1.435	1.175	-1.047	0.627842	3.82287e-08	0.000201062	0.934869	0.61942	0.0196773	3.82287e-08	0.000239875	0.0541424	0.563706	1	1	1	1	1	1	1	Sm
12945	-1.006	1.354	1.008	-1.166	-1.14	1.754	1.346	-1.157	1.539	-1.329	0.908649	3.64001e-05	0.887002	0.0123687	0.0289384	1.05423e-08	3.64001e-05	0.0167289	4.5513e-07	7.43454e-05	0	0	1	1	0	0	1	OoSmCc
12946	1.073	-1.129	-0.004	1.126	1.1455	1.0585	-1.052	1.12	1.21	1.285	0.230857	0.0593961	0.604091	0.18635	0.0578373	0.460377	0.0593961	0.102736	0.00199196	0.000271755	1	1	1	1	1	1	1	Sm
12950	-1.068	-1.177	1.061	-1.044	-1.001	-1.001	-1.257	1.016	-1.003	-1.046	0.101019	0.000484044	0.135497	0.271503	0.969968	0.976927	0.000484044	0.672202	0.946926	0.256291	1	0	0	0	0	0	0	Sm
12953	1.004	1.085	-1.028	1.012	1.071	-1.04	1.088	-1.016	1.03	1.084	0.946348	0.140568	0.603029	0.820067	0.208726	0.46995	0.140568	0.768642	0.577769	0.142518	1	1	1	1	1	1	1	Sm
12955	1.075	-1.311	1.156	1.21	-1.037	-1.021	-1.22	1.399	-1.059	1.166	0.254139	0.000349564	0.0292014	0.00616612	0.555556	0.736762	0.000349564	3.82864e-05	0.358863	0.0218867	1	1	0	1	1	1	1	Sm
12959	1.045	-1.022	1.005	1.032	-1.077	1.652	1.022	1.038	1.535	-1.043	0.289919	0.586952	0.892965	0.438102	0.0819362	4.91939e-10	0.586952	0.365058	5.57119e-09	0.306333	1	1	1	1	1	0	1	Sm
12965	1.074	-4.619	1.081	-1.009	-1.057	1.047	-4.3	1.072	-1.009	-1.066	0.452729	6.7445e-12	0.413261	0.927113	0.558008	0.62621	6.7445e-12	0.465932	0.920335	0.499253	1	1	0	0	0	0	0	Sm
12972	1.065	-1.109	0.344	0.351333	0.389	-1.06067	-1.04133	0.362333	-0.338	1.074	0.293664	0.101442	0.683992	0.734674	0.440416	0.46778	0.101442	0.457309	0.360169	0.308255	1	1	1	1	1	1	1	OoSm
12974	-1.067	1.294	1.153	-1.198	1.193	-1.034	1.213	-1.039	1.154	-1.004	0.509905	0.0157847	0.156809	0.0776285	0.0838575	0.730317	0.0157847	0.696577	0.155642	0.967182	1	1	1	1	1	1	1	Sm
12978	-1.089	-1.053	1.034	-1.01	-1.055	1.077	-1.147	1.024	1.021	-1.065	0.0281763	0.16443	0.360037	0.782105	0.151387	0.0529016	0.16443	0.518299	0.570701	0.092399	1	0	0	0	0	0	0	Sm
12982	-1.002	1	-1.052	1.011	1.097	1.125	-1.001	-1.04	1.234	1.109	0.975277	0.994251	0.379116	0.847721	0.114547	0.0496962	0.994251	0.488504	0.00150181	0.0805011	1	1	1	1	1	1	1	Sm
12988	-1.224	-1.048	1.135	-1.058	1.193	-1.02	-1.283	1.073	1.17	1.128	0.0251975	0.575274	0.142407	0.503196	0.046761	0.813778	0.575274	0.404934	0.0738528	0.16252	1	1	1	1	1	1	1	Sm
12995	1.012	1.016	1.019	1.007	1.012	-1.067	1.029	1.026	-1.054	1.019	0.764768	0.700694	0.644458	0.867427	0.773769	0.129412	0.700694	0.531154	0.210411	0.650261	0	0	0	1	0	0	0	Sm
13000	1.4365	1.042	-1.325	1.2545	-1.032	1.1	1.4975	-1.057	1.0655	1.215	0.0371036	0.796367	0.0927669	0.168727	0.841362	0.551684	0.796367	0.743762	0.69021	0.232571	1	1	1	1	1	1	1	Sm
13002	-1.356	-1.028	1.122	-1.212	1.056	-1.314	-1.394	-1.08	-1.244	-1.148	0.0137016	0.80672	0.312081	0.100821	0.628682	0.0247533	0.80672	0.497619	0.0653308	0.230934	1	1	1	1	1	1	1	Sm
13003	1.107	1.244	1.036	1.024	-1.244	1.338	1.378	1.062	1.076	-1.214	0.0178958	3.0147e-05	0.369819	0.544395	3.0897e-05	8.57534e-07	3.0147e-05	0.141987	0.0762906	0.000110612	0	1	1	1	1	1	1	SmMur
13006	1.086	1.049	1.036	1.025	-1.014	-1.191	1.139	1.062	-1.208	1.011	0.229289	0.481182	0.602618	0.709958	0.832512	0.0169228	0.481182	0.376189	0.0107836	0.872092	1	1	1	1	1	1	1	OoSm
13007	-2.88	-1.981	2.294	-2.615	2.525	1.77	-5.704	-1.14	4.47	-1.036	7.42215e-05	0.00379074	0.000796543	0.000200254	0.000288378	0.0123457	0.00379074	0.529029	1.14142e-06	0.866183	1	1	0	1	0	1	1	Sm
13008	1.372	-1.967	2.021	1.538	2.348	-1.132	-1.434	3.109	2.073	3.612	0.0774233	0.000881498	0.000622418	0.0202078	9.2997e-05	0.469677	0.000881498	3.3916e-06	0.000447134	6.71898e-07	1	1	1	1	1	1	1	OoSm
13010	1.049	-1.802	1.621	1.099	-1.013	-1.095	-1.718	1.781	-1.109	1.085	0.587739	3.21224e-06	3.45695e-05	0.295087	0.884297	0.312613	3.21224e-06	4.15513e-06	0.251013	0.364095	1	1	1	1	1	1	1	Sm
13014	1.136	-1.456	1.15	1.07	-1.003	1.767	-1.282	1.231	1.762	1.067	0.0963581	7.21166e-05	0.0703365	0.36183	0.968417	4.49133e-07	7.21166e-05	0.0106465	4.81381e-07	0.382291	1	1	1	1	1	1	1	Sm
13018	1.218	1.23	1.015	1.014	-1.001	-1.308	1.498	1.029	-1.31	1.013	0.00142311	0.000945566	0.783582	0.784995	0.980764	7.50911e-05	0.000945566	0.585316	7.13735e-05	0.803532	1	1	1	1	1	1	1	Sm
13019	1.012	1.025	-1.191	1.036	-1.065	1.023	1.037	-1.15	-1.041	-1.028	0.860256	0.718345	0.018742	0.606592	0.366706	0.742549	0.718345	0.0536436	0.560676	0.692189	1	1	1	1	1	1	1	Sm
13026	1.039	-1.144	-1.13	1.144	-1.107	2.497	-1.101	1.012	2.255	1.033	0.622954	0.0955761	0.127583	0.0970185	0.200289	1.00867e-09	0.0955761	0.879122	6.01805e-09	0.677031	1	1	1	1	1	1	1	Sm
13030	1.115	1.036	-1.054	1.12	-1.465	1.912	1.156	1.062	1.305	-1.308	0.332206	0.748138	0.635736	0.31455	0.00280526	1.64744e-05	0.748138	0.586782	0.0261357	0.0252806	1	1	1	1	1	1	1	Sm
13033	1.009	-1.013	-1.014	1.025	1.049	1.017	-1.004	1.01	1.067	1.075	0.804658	0.724819	0.693431	0.495566	0.187647	0.638664	0.724819	0.771227	0.0816122	0.0540509	0	1	0	0	1	0	1	Sm
13036	1.246	4.076	1.393	-1.322	-1.392	1.067	5.079	1.054	-1.304	-1.84	0.0311517	2.98353e-11	0.00253451	0.00845689	0.00256863	0.497764	2.98353e-11	0.583503	0.0113839	5.31873e-06	1	1	1	1	1	1	1	OoSmMur
13038	1.064	-1.529	1.288	1.143	-1.328	1.161	-1.437	1.472	-1.144	-1.162	0.447089	5.65517e-05	0.00561427	0.113629	0.00246701	0.0797091	5.65517e-05	0.000153755	0.110431	0.0773645	1	1	1	1	1	1	1	Sm
13039	1.034	-1.044	1.201	1.14	1.646	-1.405	-1.009	1.368	1.171	1.876	0.669426	0.588875	0.0309983	0.110607	6.38652e-06	0.000408799	0.588875	0.0008567	0.0579727	3.05889e-07	1	1	1	1	1	1	1	OoSm
13043	1.03075	-1.18775	1.03375	0.541	1.03725	1.13625	-1.15175	1.07625	1.17825	1.07925	0.541347	0.154276	0.515943	0.254697	0.514136	0.090596	0.154276	0.322259	0.0355074	0.251567	1	1	1	0.75	1	1	1	OoSmMur
13046	1.17667	0.518333	0.329333	1.045	0.411333	1.27767	1.39667	0.375	1.37533	1.12567	0.0259342	0.323158	0.570234	0.537535	0.37725	0.00352155	0.323158	0.361113	0.000565247	0.15367	1	1	1	1	1	1	1	Sm
13047	-0.566	0.55125	0.09525	-0.5345	0.54925	-1.14775	-0.01425	0.057	-1.09425	0.5135	0.381788	0.248405	0.474694	0.627441	0.566211	0.127314	0.248405	0.274453	0.192115	0.549979	0.75	1	0.75	0.75	1	0.75	0.5	SmMur
13051	-1.159	-1.616	1.044	1.051	-1.062	1.129	-1.873	1.097	1.063	-1.011	0.0187876	1.7639e-07	0.457979	0.394474	0.304906	0.0484366	1.7639e-07	0.120796	0.300451	0.856033	1	1	0	0	1	0	1	Sm
13056	-1.246	1.214	-1.084	-1.151	-1.123	-1.031	-1.027	-1.247	-1.158	-1.292	0.0394477	0.0659033	0.423837	0.173689	0.256282	0.760962	0.0659033	0.038758	0.156117	0.0188647	1	1	1	1	1	1	1	Sm
13057	-1.18	-1.959	1.372	1.086	-1.361	1.258	-2.313	1.49	-1.082	-1.252	0.0476578	1.21059e-07	0.000800084	0.30096	0.00100647	0.00891154	1.21059e-07	8.24023e-05	0.327344	0.0100867	1	1	1	1	1	1	1	Sm
13063	1.03	-1.014	1.026	1.044	1.031	-1.074	1.016	1.071	-1.042	1.076	0.454496	0.720264	0.520071	0.286999	0.448135	0.087239	0.720264	0.0970493	0.313743	0.0779503	0	0	0	0	0	1	0	OoSm
13070	1.009	1.011	1.32	1.177	1.001	10.854	1.02	1.553	10.868	1.178	0.916681	0.896713	0.00330216	0.0617972	0.987211	4.97643e-16	0.896713	4.62439e-05	4.93045e-16	0.0599116	0	0	0	1	1	1	1	OoSm
13074	1.098	2.155	2.292	2.117	-1.301	2.807	2.367	4.851	2.157	1.627	0.745746	0.0151318	0.00958696	0.0172609	0.367261	0.00205924	0.0151318	3.45888e-05	0.015013	0.105193	0	0	1	1	1	1	1	Sm
13075	1.583	2.11	1.056	-1.577	2.354	4.666	3.341	-1.493	10.983	1.493	0.0139601	0.000349853	0.749678	0.0147384	8.79693e-05	5.22157e-08	0.000349853	0.0287319	6.46373e-11	0.0287844	1	1	1	1	1	1	1	OoSm
13078	1.098	-1.262	-1.176	1.08	1.348	1.397	-1.149	-1.089	1.884	1.457	0.40614	0.0494421	0.158364	0.492084	0.0146855	0.00740426	0.0494421	0.450008	2.31563e-05	0.00327394	1	1	1	1	1	1	1	Sm
13107	-1.124	-1.304	1.006	-1.034	-1.007	1.026	-1.467	-1.027	1.019	-1.041	0.0114832	6.30828e-06	0.881087	0.433691	0.861568	0.538694	6.30828e-06	0.524374	0.658104	0.341339	1	1	0	0	0	0	0	OoSm
13123	-1.033	-1.204	1.097	1.008	-1.157	-1.086	-1.243	1.106	-1.256	-1.149	0.584358	0.00490963	0.124694	0.894354	0.0208249	0.171112	0.00490963	0.0981541	0.000973078	0.0274283	1	1	1	1	1	1	1	SmCcMr
13132	0.125	1.3525	1.582	1.293	-1.0845	-1.702	1.518	2.027	-1.845	1.191	0.452014	0.0213851	0.00131794	0.110793	0.469216	0.000494676	0.0213851	2.93665e-05	0.000192449	0.214088	1	1	1	1	1	1	1	OoSm
13135	-1.1	-1.362	1.034	1.147	1.221	-1.325	-1.498	1.186	-1.085	1.4	0.317197	0.00385786	0.720239	0.157199	0.0454269	0.00737512	0.00385786	0.0826621	0.39029	0.00202466	1	1	1	1	1	1	1	Sm
13136	1.033	-1.783	-1.072	1.095	-1.577	1.322	-1.727	1.022	-1.193	-1.44	0.750766	2.04107e-05	0.495118	0.373811	0.000265675	0.0121787	2.04107e-05	0.831408	0.0939835	0.00191335	1	1	1	1	1	0	1	OoSmMur
13138	1.043	-0.008	-1.1055	1.185	-1.332	-0.0135	1.035	1.0725	-1.3535	-1.124	0.764209	0.645195	0.448592	0.208976	0.0663432	0.769753	0.645195	0.595539	0.0854955	0.417802	1	1	1	1	1	1	1	Sm
13139	-1.052	1	1.016	-1.015	-1.05	1.122	-1.053	1.001	1.069	-1.066	0.233682	0.99407	0.697614	0.720169	0.253569	0.0125626	0.99407	0.975667	0.126286	0.140497	1	1	1	1	1	0	1	Sm
13143	1.128	-1.326	-1.179	1.142	-1.313	1.035	-1.176	-1.032	-1.269	-1.149	0.23953	0.0108762	0.113663	0.196126	0.0135526	0.734572	0.0108762	0.751225	0.0276114	0.177174	1	1	1	1	1	1	1	Sm
13144	-1.157	-1.081	-1.024	-1.17	1.044	1.258	-1.251	-1.197	1.313	-1.12	0.140248	0.417729	0.805005	0.114448	0.65474	0.0260833	0.417729	0.0725014	0.0101175	0.243342	1	1	1	1	1	1	1	Sm
13163	-1.067	1.133	-1.07	1.027	1.003	-1.048	1.062	-1.043	-1.045	1.03	0.484816	0.185942	0.462518	0.773947	0.97209	0.609942	0.185942	0.651454	0.634395	0.747409	1	1	1	1	1	1	1	Sm
13164	-1.472	1.622	-1.191	-1.577	-2.108	-1.175	1.102	-1.878	-2.477	-3.325	0.0666436	0.0253272	0.388889	0.0338408	0.00149047	0.425787	0.0253272	0.00532767	0.00025593	1.19449e-05	1	1	1	1	1	1	0	SmMur
13167	0.274667	-1.10033	1.192	1.12167	1.113	1.52833	-1.164	1.34133	1.701	1.24933	0.445856	0.243972	0.072674	0.156855	0.171555	0.053401	0.243972	0.00251218	0.000328691	0.0132835	0.666667	1	0.666667	1	1	1	1	SmCc
13169	1.014	1.017	-1.058	1.013	1.192	1.081	1.031	-1.045	1.288	1.208	0.859986	0.833455	0.473806	0.869379	0.0358377	0.329511	0.833455	0.579053	0.0043794	0.0256039	1	1	1	1	1	1	1	Sm
13170	1.196	1.264	-1.112	1.045	-1.881	3.591	1.512	-1.064	1.909	-1.8	0.25742	0.143687	0.498325	0.775935	0.000696369	1.96149e-07	0.143687	0.692167	0.000563979	0.0013042	1	1	1	1	1	1	1	SmCcMr
13171	-1.247	1.242	1.167	-1.104	1.209	1.337	-1.004	1.057	1.616	1.094	0.0280541	0.0305531	0.111312	0.294965	0.0550808	0.00570101	0.0305531	0.557142	6.87813e-05	0.341393	1	1	1	1	1	1	1	Sm
13175	1.299	1.516	-1.553	-1.177	-1.201	-1.085	1.969	-1.829	-1.303	-1.414	0.000609252	3.91443e-06	1.89201e-06	0.018005	0.00919678	0.21004	3.91443e-06	2.4423e-08	0.000549632	3.46437e-05	1	1	1	1	1	0	0	SmMur
13177	-1.213	1.068	1.179	-1.03	1.146	1.24	-1.136	1.145	1.421	1.113	0.0542274	0.491008	0.0957072	0.754384	0.161477	0.0341853	0.491008	0.166402	0.00153362	0.267739	1	1	1	1	1	1	1	Sm
13178	1.038	-1.101	1.024	1.04	1.066	-1.014	-1.061	1.065	1.051	1.108	0.509657	0.0992675	0.668175	0.487163	0.26298	0.805607	0.0992675	0.267458	0.376707	0.0790695	1	1	0	0	1	0	0	OoSm
13179	-1.307	-6.5835	2.2435	1.1705	-1.6095	-1.1315	-8.62	2.6095	-1.821	-1.385	0.108661	8.10795e-11	1.57803e-05	0.264762	0.00415099	0.342125	8.10795e-11	8.52181e-07	0.000419137	0.112525	1	1	1	1	1	1	1	OoSm
13180	1.042	1.276	1.011	-1.025	-1.052	-1.099	1.33	-1.014	-1.156	-1.079	0.523262	0.00133134	0.864055	0.701032	0.433093	0.156442	0.00133134	0.831059	0.0353604	0.249077	1	1	1	1	1	1	1	OoSm
13184	-1.41	-1.775	-1.781	-1.466	-1.383	-1.23	-2.503	-2.611	-1.702	-2.028	0.000409035	1.19007e-06	1.1125e-06	0.000140455	0.000691475	0.0170867	1.19007e-06	7.26966e-10	3.19201e-06	6.79995e-08	1	1	1	1	1	1	0	Sm
13185	0.0365	-0.04	1.0435	0.009	1.1015	1.0985	-0.004	1.0525	1.21	1.1115	0.387487	0.462577	0.446094	0.583096	0.0513481	0.106792	0.462577	0.282907	0.00162454	0.0605994	1	1	1	1	1	1	1	Sm
13191	-1.02	-1.122	-1.051	1.136	-1.003	1.182	-1.144	1.081	1.178	1.133	0.761869	0.0968442	0.45382	0.0674847	0.964072	0.0204214	0.0968442	0.251876	0.0224334	0.0735295	1	1	1	1	1	1	1	Sm
13194	-1.08	1.027	1.234	-1.068	1.057	1.038	-1.052	1.155	1.097	-1.011	0.623225	0.866219	0.189063	0.671851	0.723614	0.811698	0.866219	0.361838	0.555429	0.943836	1	1	1	1	1	1	1	Sm
13195	1.022	1.047	-1.013	1.044	1.426	1.229	1.07	1.031	1.751	1.488	0.73327	0.484436	0.844774	0.50958	3.64827e-05	0.00512451	0.484436	0.640934	1.05168e-07	9.53607e-06	0	0	1	0	1	1	1	SmCc
13196	-1.106	-1.455	1.135	-1.052	-1.024	1.733	-1.609	1.079	1.693	-1.077	0.491606	0.0177936	0.388694	0.726293	0.871841	0.00128792	0.0177936	0.603839	0.00183871	0.609989	1	1	1	1	1	1	1	SmCcMr
13197	-1.233	-1.742	2.779	-2.037	1.5185	2.167	-2.1445	1.365	3.3235	-1.3765	0.264007	0.0490049	0.000305088	0.00351405	0.150621	0.0042236	0.0490049	0.147592	0.000418503	0.194473	1	1	1	1	1	1	1	SmCcMr
13198	-0.0115	1.105	1.04	-1.054	1.1145	-1.1175	1.093	-0.0135	-0.0045	0.0575	0.453044	0.251954	0.612721	0.503302	0.359589	0.2069	0.251954	0.847888	0.625635	0.4657	1	1	1	1	1	1	1	OoSmCc
13202	-1.008	-1.012	-1.014	1.002	1.019	-1.005	-1.021	-1.012	1.014	1.021	0.871266	0.812781	0.785647	0.96616	0.71877	0.92185	0.812781	0.818354	0.793001	0.687499	1	1	1	1	1	1	1	Sm
13204	1.106	0.077	1.1	1.195	0.097	-1.2725	0.2	1.313	-0.187	1.306	0.238674	0.0856762	0.311416	0.0468481	0.381485	0.0219984	0.0856762	0.00769111	0.19615	0.0447014	1	1	1	1	1	1	1	Sm
13205	1.239	1.302	1.104	-1.065	-1.255	1.161	1.614	1.036	-1.081	-1.337	0.115538	0.0564484	0.455483	0.63031	0.0969857	0.26413	0.0564484	0.787676	0.555387	0.038215	1	1	1	1	1	1	1	Sm
13207	1.147	-1.245	1.074	1.121	1.076	1.315	-1.085	1.203	1.416	1.206	0.203197	0.0499697	0.502725	0.287942	0.48735	0.0172217	0.0499697	0.0926336	0.0037984	0.0884728	1	1	1	1	1	1	1	OoSm
13209	-1.2605	-1.0705	-1.0595	-0.0115	0.029	-1.181	-1.3385	-0.0735	-1.144	1.0165	0.411155	0.43315	0.591548	0.689672	0.639021	0.19166	0.43315	0.516761	0.155202	0.856858	1	1	1	1	1	1	1	OoSm
13211	1.163	-1.229	1.123	1.148	1.174	-1.127	-1.057	1.29	1.042	1.348	0.0247547	0.00366039	0.0746064	0.0373971	0.0179233	0.0680377	0.00366039	0.00065736	0.511271	0.00014088	1	1	1	1	1	1	1	OoSm
13244	1.149	-1.326	-1.163	1.171	-1.324	1.37	-1.154	1.007	1.035	-1.131	0.166493	0.00915736	0.13353	0.118194	0.009429	0.00439525	0.00915736	0.94502	0.72625	0.217868	1	1	1	1	1	1	1	Sm
13340	1.02	1.055	-1.088	-1.012	1.023	1.009	1.076	-1.101	1.032	1.011	0.654984	0.247068	0.0749224	0.796924	0.617177	0.844934	0.247068	0.0454596	0.488675	0.807283	0	1	1	0	0	0	0	Sm
13345	1.346	-2.149	1.131	1.058	-1.145	1.087	-1.597	1.197	-1.053	-1.083	0.0013451	1.86641e-08	0.130318	0.477812	0.0982868	0.29545	1.86641e-08	0.033313	0.512131	0.320553	1	1	1	1	1	0	1	Sm
13346	-1.108	-1.081	1.014	-1.025	1.065	1.576	-1.197	-1.01	1.679	1.04	0.0835594	0.181571	0.801278	0.66867	0.271058	2.63779e-07	0.181571	0.8594	4.2126e-08	0.492139	1	1	0	1	0	0	1	Sm
13347	1.015	-1.091	1.01	1.015	1.068	1.074	-1.074	1.025	1.147	1.084	0.738171	0.066036	0.820442	0.738727	0.153298	0.125443	0.066036	0.57642	0.00640408	0.0842271	1	1	0	0	0	0	1	Sm
13350	-1.005	1.02	-1.033	-1.025	1.015	1.578	1.015	-1.058	1.602	-1.009	0.931536	0.710452	0.543101	0.647601	0.775989	1.03934e-07	0.710452	0.292657	6.55363e-08	0.86221	1	1	1	1	1	1	1	Sm
13353	-1.091	1.0975	1.0275	-1.05	1.0545	-0.005	0.0055	-0.0215	1.049	0.0055	0.30854	0.290828	0.737466	0.600812	0.5239	0.921716	0.290828	0.623011	0.559502	0.732386	1	1	1	1	1	1	1	Sm
13356	-0.199	1.487	0.0345	-1.0225	-1.1165	-1.2685	1.22	0.0115	-1.443	-1.141	0.481911	0.0347583	0.733981	0.706751	0.458338	0.383342	0.0347583	0.549671	0.312473	0.232176	1	1	1	1	1	1	1	SmMur
13358	-0.0875	1.1765	-0.0155	-0.0525	0.0305	1.8325	1.0795	-0.0705	1.8805	-0.023	0.314995	0.354188	0.835614	0.465922	0.528697	1.5027e-07	0.354188	0.423519	6.19281e-08	0.126027	1	1	1	1	1	1	1	Sm
13360	-1.006	1.028	1.054	-1.089	1.249	3.677	1.021	-1.034	4.591	1.146	0.944642	0.752936	0.543858	0.32744	0.0181374	2.11757e-11	0.752936	0.702197	1.67635e-12	0.126809	1	1	1	1	1	1	1	SmCcMr
13363	1.479	3.271	-1.026	1.055	1.133	-2.482	4.838	1.028	-2.19	1.195	0.0054841	2.6423e-08	0.835238	0.671335	0.323535	1.05551e-06	2.6423e-08	0.82806	6.96818e-06	0.16565	1	1	1	1	1	1	1	Sm
13367	-1.03	1.112	-1.052	-1.115	-1.048	1.033	1.08	-1.173	-1.014	-1.168	0.691642	0.167121	0.498239	0.158942	0.533764	0.662217	0.167121	0.0448488	0.851113	0.0501056	1	1	1	1	1	1	1	Sm
13382	-1.084	1.077	1.208	-1.127	-1.111	1.036	-1.006	1.073	-1.072	-1.252	0.210193	0.243059	0.00688413	0.0695949	0.104892	0.569643	0.243059	0.271647	0.272928	0.00197821	1	1	1	1	1	1	1	Sm
13384	-1.025	1.207	-1.086	1.057	1.047	-1.205	1.178	-1.028	-1.151	1.107	0.575467	0.000367922	0.0689276	0.211525	0.293175	0.000400136	0.000367922	0.528636	0.00419997	0.0290842	1	0	1	1	1	1	0	SmMur
13386	-1.792	-5.331	1.051	-1.017	-1.017	-1.03	-9.55	1.033	-1.048	-1.035	0.00466064	4.07731e-08	0.785463	0.924675	0.925703	0.869592	4.07731e-08	0.858829	0.796984	0.851093	1	1	0	0	0	0	0	OoSm
13393	1.069	-1.032	1.001	-1.03	1.016	-1.001	1.035	-1.029	1.014	-1.014	0.116313	0.439318	0.985306	0.470233	0.705939	0.972486	0.439318	0.481371	0.73158	0.727067	0	1	0	0	0	0	0	Sm
13401	-0.0275	1.224	-1.1665	0.0545	0.024	-1.0485	1.1975	-1.11	-0.026	0.0765	0.328509	0.080829	0.37605	0.0597499	0.487875	0.577957	0.080829	0.406761	0.698186	0.253324	1	1	1	1	1	1	1	Sm
13417	-1.017	1.17	-1.39	-1.128	-1.017	-1.107	1.151	-1.568	-1.126	-1.147	0.741792	0.00543309	3.81716e-06	0.0259284	0.740608	0.0539451	0.00543309	5.7329e-08	0.0277193	0.0129184	1	1	1	1	1	0	0	Sm
13423	1.029	1.039	-1.036	1.086	-1.069	1.021	1.069	1.048	-1.048	1.016	0.524135	0.389734	0.429003	0.0745889	0.1417	0.644414	0.389734	0.291285	0.299084	0.724482	0	1	1	0	1	0	0	Sm
13424	-1.297	-1.118	1.329	-1.061	1.365	-1.172	-1.45	1.253	1.165	1.287	0.0154341	0.262439	0.00899562	0.550305	0.00497778	0.119273	0.262439	0.0318536	0.131813	0.0181251	1	1	1	1	1	1	1	Sm
13426	-1.026	-1.059	1.0335	0.006	1.046	1.1935	-1.086	1.04	1.246	1.052	0.613241	0.252476	0.46719	0.720762	0.442316	0.00921021	0.252476	0.367399	0.000281289	0.282675	0	0	0	0	0	0	1	SmMur
13427	1.036	-1.14	-1.093	-1.026	-1.039	1.341	-1.101	-1.121	1.291	-1.066	0.574236	0.0477382	0.166471	0.685907	0.541012	0.000176611	0.0477382	0.0807009	0.000672718	0.315035	1	1	1	1	1	1	1	Sm
13430	-1.023	1.029	1.033	-1.07	1.029	1.192	1.007	-1.036	1.226	-1.04	0.595113	0.492688	0.441911	0.119694	0.500942	0.000511572	0.492688	0.406601	0.000118152	0.355081	1	1	1	1	1	1	1	SmCcMr
13436	1.09	1.135	-1.23	1.052	1	-1.343	1.237	-1.169	-1.343	1.053	0.272588	0.113741	0.0141048	0.512111	0.995694	0.00116253	0.113741	0.054523	0.00117644	0.50871	1	1	1	1	1	1	1	SmMur
13447	-0.036	-1.452	-0.053	-0.188	-1.273	1.088	-1.526	-1.221	-1.171	-1.5085	0.0721169	0.00430439	0.18549	0.383366	0.0478715	0.471559	0.00430439	0.110207	0.199159	0.0443074	1	1	1	1	1	0.5	1	Sm
13448	-1.034	1.0575	-0.0005	1.059	1.1465	1.122	1.023	1.0575	1.2855	1.2155	0.460195	0.240446	0.509397	0.304605	0.0282674	0.0205761	0.240446	0.21393	6.60758e-05	0.00877828	1	0	0.5	0	1	1	1	SmCcMr
13449	-1.1	-1.034	1	-1.027	1.013	1.008	-1.138	-1.027	1.021	-1.013	0.0476372	0.467499	0.998036	0.564046	0.773429	0.859721	0.467499	0.562408	0.642961	0.770962	1	0	0	0	0	0	0	Sm
13476	-1.105	-1.77	1.316	1.019	1.072	1.54	-1.957	1.34	1.65	1.091	0.241413	2.36872e-06	0.00391956	0.826216	0.412851	6.53585e-05	2.36872e-06	0.00241694	1.20183e-05	0.302881	1	1	1	1	1	1	1	SmCc
13478	1.245	1.023	-1.086	1.225	1.221	-1.055	1.274	1.128	1.157	1.495	0.0223015	0.793737	0.357725	0.0329466	0.0352621	0.547945	0.793737	0.186769	0.112416	0.000249174	1	1	1	1	1	1	1	Sm
13479	-1.01	-1.137	1.057	1.133	-1.116	1.294	-1.148	1.197	1.16	1.015	0.864859	0.0341866	0.333897	0.0388464	0.0659916	0.00023639	0.0341866	0.0048776	0.0161972	0.787638	1	1	0	0	1	0	1	Sm
13480	-1.02	0.0065	-1.0385	1.03	-1.0075	-0.0105	-1.0135	-0.008	-1.018	1.023	0.658921	0.668363	0.353201	0.44414	0.858855	0.628141	0.668363	0.589659	0.642253	0.568022	1	1	1	0.5	1	0	0	Sm
13481	1.166	-1.04	-1.123	1.289	1.09	-1.188	1.121	1.148	-1.09	1.405	0.221867	0.749963	0.350989	0.0511298	0.486236	0.172434	0.749963	0.270505	0.48583	0.0120352	1	1	1	1	1	1	1	Sm
13482	1.05	-1.518	1.017	1.02	-1.022	1.004	-1.447	1.037	-1.018	-1.002	0.164669	4.92228e-10	0.616323	0.567973	0.529061	0.915415	4.92228e-10	0.289722	0.599724	0.95267	1	1	0	0	0	0	0	Sm
13491	-1.023	1.131	-1.079	-1.113	1.53	1.244	1.106	-1.202	1.904	1.375	0.665009	0.03103	0.163687	0.0570085	3.03367e-07	0.000648038	0.03103	0.00275273	6.99158e-10	1.26942e-05	0	0	1	1	0	1	1	SmCcMr
13494	-0.052	-1.3165	0.022	1.181	1.138	-0.0165	-1.394	1.2005	1.119	1.338	0.351699	0.00351316	0.191112	0.12547	0.129779	0.377865	0.00351316	0.0134722	0.11429	0.000781211	1	1	1	1	1	1	1	OoSm
13495	-1.078	-1.054	1.128	1.016	1.238	-1.108	-1.135	1.146	1.117	1.258	0.148852	0.305144	0.0263687	0.7469	0.000466555	0.0531852	0.305144	0.0133815	0.0388746	0.000230996	1	1	1	1	1	1	1	Sm
13496	-1.101	1.028	-1.06	-1.098	-1.005	1.045	-1.071	-1.164	1.04	-1.104	0.0896712	0.610314	0.286515	0.0978054	0.924789	0.420573	0.610314	0.0110072	0.475577	0.0821116	1	1	1	1	1	1	1	Sm
13497	1.07	1.172	-2.106	1.014	-1.206	1.007	1.254	-2.078	-1.197	-1.19	0.31642	0.0275155	2.29605e-09	0.840617	0.0109406	0.911817	0.0275155	3.02228e-09	0.0138628	0.0167925	1	1	1	1	1	0	0	Sm
13498	-1.128	-1.074	1.13	-1.107	1.02	-1.101	-1.212	1.021	-1.079	-1.085	0.196438	0.436054	0.190055	0.272308	0.825374	0.296863	0.436054	0.820546	0.405986	0.375312	1	1	1	1	1	1	1	Sm
13518	-1.029	0.015	1.0745	1.2435	-1.172	-1.229	-0.015	1.338	-1.4395	0.0735	0.746261	0.677909	0.590447	0.0242472	0.365515	0.0383186	0.677909	0.0105897	0.00256127	0.420105	1	1	1	1	1	1	0.5	OoSmMur
13525	1.042	-1.01	-1.043	1.028	1.118	1.001	1.032	-1.015	1.119	1.15	0.398812	0.842744	0.390591	0.574343	0.0320953	0.988047	0.842744	0.761599	0.0311298	0.00980366	0	0	0	0	0	1	1	Sm
13527	-1.01	1.029	-1.147	1.057	-1.036	-1.031	1.019	-1.085	-1.068	1.02	0.815665	0.520058	0.00597673	0.223484	0.432968	0.487883	0.520058	0.0780443	0.148811	0.651192	1	1	1	0	0	0	0	SmCcMr
13528	-1.041	-1.102	-1.084	-1.171	-1.113	-1.122	-1.147	-1.269	-1.249	-1.304	0.516278	0.130237	0.204657	0.0186075	0.0955084	0.0759389	0.130237	0.0010976	0.00195506	0.000418318	1	1	1	1	1	1	1	SmCcMr
13537	1.065	1.21	-1.1785	-1.1295	-0.0155	0.0295	1.2905	-1.3315	1.0135	-1.149	0.343162	0.00545222	0.00699303	0.0724457	0.546009	0.508974	0.00545222	0.000149573	0.811759	0.125673	0.5	1	1	0.5	0	0	0	Sm
13542	-1.163	1.122	1.0135	-1.0275	-0.0005	1.074	-1.038	-0.014	1.0745	-1.028	0.0263181	0.201894	0.768222	0.613182	0.734279	0.298087	0.201894	0.735384	0.430897	0.570246	1	0.5	1	0.5	0.5	0.5	0.5	OoSm
13548	-1.025	1.06	1.001	1.005	1.039	-1.019	1.034	1.006	1.019	1.044	0.488766	0.115135	0.973892	0.886008	0.290827	0.592245	0.115135	0.860257	0.593297	0.233347	0	0	1	0	0	1	0	OoSm
13549	-1.028	1.355	-1.29	1.025	1.122	-1.153	1.319	-1.258	-1.027	1.15	0.820699	0.021121	0.0485294	0.838446	0.349156	0.251213	0.021121	0.0720584	0.824607	0.258207	1	1	1	1	1	1	1	Sm
13557	1.047	-1.037	1.061	1.001	1.17	1.097	1.009	1.062	1.283	1.171	0.366249	0.469113	0.250777	0.986441	0.00568964	0.0782502	0.469113	0.244234	0.000101071	0.0054824	1	1	1	1	1	1	1	Sm
13559	1.105	1.197	-1.084	-1.331	-2.441	-1.393	1.322	-1.443	-3.401	-3.248	0.310843	0.077631	0.408371	0.00819731	4.0704e-08	0.00291147	0.077631	0.00131067	3.54384e-10	6.40233e-10	1	1	1	1	1	1	1	Sm
13560	-1.071	1.21	-1.067	-1.036	1.037	-1.139	1.13	-1.106	-1.099	1.001	0.113316	0.000230132	0.130287	0.401026	0.394088	0.00561761	0.000230132	0.0253299	0.0348531	0.989752	1	1	1	1	1	1	1	Sm
13589	1.08	1.033	-1.099	1.068	1.06	-1.037	1.116	-1.028	1.022	1.133	0.179513	0.55812	0.10592	0.245895	0.301944	0.513446	0.55812	0.619668	0.696221	0.036738	1	1	1	1	1	1	1	OoSm
13595	1.038	1.027	1.187	1.176	1.327	1.669	1.066	1.396	2.215	1.561	0.588463	0.692381	0.0205012	0.0270254	0.000570442	6.76382e-07	0.692381	0.000114931	1.17281e-09	4.10697e-06	1	1	1	1	1	1	1	SmMur
13601	-1.112	-1.3305	1.1785	1.037	-0.0255	2.6505	-1.501	1.226	2.524	0.012	0.202303	0.179382	0.341133	0.598597	0.468617	4.06033e-05	0.179382	0.247871	1.37409e-05	0.653762	0.5	0.5	0	0.5	0.5	0.5	1	SmCc
13603	-1.048	1.039	1.032	-1.089	-1.016	1.04	-1.009	-1.056	1.023	-1.107	0.161641	0.255326	0.343243	0.016424	0.621296	0.241714	0.255326	0.109946	0.487466	0.00564969	0	0	0	1	0	0	0	Sm
13614	1.017	-1.038	1.134	1.123	-1.011	-1.04	-1.021	1.273	-1.051	1.111	0.764636	0.498557	0.0328241	0.0463559	0.847127	0.482941	0.498557	0.000333824	0.373986	0.0674988	0	0	0	1	1	1	1	OoSmCc
13615	1.371	-1.609	1.271	-1.16	-1.115	1.783	-1.174	1.096	1.6	-1.293	0.010148	0.000426491	0.0421331	0.191808	0.334282	5.84724e-05	0.000426491	0.413726	0.000477626	0.0308967	1	1	0	1	0	0	1	Sm
13617	1.124	-1.788	1.015	1.538	1.13	-2.013	-1.59	1.562	-1.782	1.738	0.238656	1.25965e-05	0.878486	0.00031786	0.220511	1.2276e-06	1.25965e-05	0.000228164	1.35e-05	2.25833e-05	1	1	1	1	1	1	1	Sm
13618	-0.01	-1.2945	1.389	1.4075	1.1905	1.1035	-1.3095	2.0475	1.3175	1.6855	0.892161	0.206685	0.13167	0.00475697	0.0146122	0.44051	0.206685	0.000389605	0.001459	4.65183e-06	0.5	0.5	0.5	0.5	1	1	1	SmCcMr
13619	-0.062	-1.1385	-1.1735	-0.018	-1.159	-1.401	-1.2065	-1.1925	-1.62	-1.175	0.411618	0.189956	0.121866	0.372435	0.203884	0.00878829	0.189956	0.126158	0.000174092	0.124864	1	1	1	1	1	1	1	Sm
13626	-1.01	1.338	-1.087	-1.004	-1.058	-1.176	1.324	-1.092	-1.244	-1.062	0.916236	0.00813388	0.400851	0.966713	0.569876	0.114473	0.00813388	0.378606	0.0384733	0.542312	1	1	1	1	1	1	1	Sm
13629	-1.2055	-1.439	1.4625	-1.2995	1.2875	1.0385	-1.7345	1.1245	1.337	-0.01	0.143499	0.00833772	0.00630787	0.0465389	0.0584118	0.772702	0.00833772	0.36919	0.0297818	0.896398	1	1	1	1	1	1	1	Sm
13636	1.143	-1.476	-1.093	1.129	-1.123	-1.102	-1.292	1.032	-1.237	1.005	0.173186	0.000657245	0.354864	0.213987	0.232651	0.315261	0.000657245	0.738165	0.0362997	0.958127	1	1	1	1	1	1	1	Sm
13639	-1.106	1.3005	-1.2315	-1.103	-1.069	-0.0405	1.176	-1.357	-1.114	-1.179	0.102292	0.000357368	0.00579621	0.146795	0.288898	0.390556	0.000357368	7.46523e-05	0.353258	0.0112249	1	1	1	1	1	1	1	Sm
[truncated: 7,783 more rows]

## Sheet: Mural
ENTREZ ID	Average intensity		Fold change	p-value (fdr corrected)	Presence		Location
[truncated: 9,252 more rows]

## Sheet: Cumulus
ENTREZ ID	Average intensity		Fold change	p-value (fdr corrected)	Presence		LOCATION
[truncated: 8,884 more rows]

[truncated: 1 more sheets: Cumulus NSN to SN]
